# Supplementary material for: Functional interrogation of HOXA9 regulome in MLLr leukemia via reporter-based CRISPR/Cas9 screen
Source: eLife. 2020 Oct 1;9:e57858. doi: 10.7554/eLife.57858 (PMC7599066; doi:10.7554/eLife.57858)
Supplement: Supplementary file 2. [file elife-57858-supp2.xlsx]

## Sheet: Raw counts related to Fig 3-1 
gene	gRNAID	Gene	count_hTF-top-rep1	count_hTF-btm-rep1	count_hTF-top-rep2	count_hTF-btm-rep2
ZNF506	ZNF506_4	AAAAACCTTTAACTATGAAG	3	19	24	7
AC008770.3/ZNF700	AC008770.3/ZNF700_1	AAAACCCCAGAAGAAGCTTC	22	20	71	6
STAT3	STAT3_6	AAAACCCTCAAGAGTCAAGG	29	65	78	8
TLX3	TLX3_7	AAAACCGGAGGACCAAGTGG	23	48	45	10
ZNF101	ZNF101_5	AAAACCTGGGGATTAAGCTA	13	43	23	10
MSANTD4	MSANTD4_2	AAAACGACGACTGGATATCG	13	13	31	3
GTF2IRD2B	GTF2IRD2B_4	AAAACGCAAGATAGACCAGG	30	40	47	17
IRF9	IRF9_1	AAAACTCCGGAACTGGGTGG	26	22	54	7
TBX18	TBX18_2	AAAACTGGGCGCCGAAGAGG	7	21	19	7
FOSB	FOSB_5	AAAACTTACCTGGGAGGCGG	22	2	87	1
PRRX1	PRRX1_5	AAAAGAAGAGAAAGCAGCGA	5	3	17	0
ZNF331	ZNF331_2	AAAAGACCTGCTACTAGAGA	36	79	116	17
ZNF471	ZNF471_3	AAAAGACGAGCCATCACTGA	16	53	19	9
TIGD1	TIGD1_1	AAAAGAGTACGACTCACCGA	43	55	85	26
ZNF597	ZNF597_4	AAAAGAGTCTTTGGAGGATG	29	27	121	5
SHOX	SHOX_2	AAAAGCAAGGACGGTAACGG	17	25	51	9
ZNF552	ZNF552_7	AAAAGCCATTACAGCTGTGG	57	43	154	19
ZNF804A	ZNF804A_3	AAAAGCTCTGGAAGATCTGA	34	42	142	10
TP63	TP63_3	AAAAGCTGAGCACGTCACGG	44	32	65	15
ZNF92	ZNF92_7	AAAAGCTGAGGACCAGCTAA	13	8	34	2
ZNF732	ZNF732_6	AAAAGGAAGGTGCAGAAAGG	32	101	64	30
L3MBTL4	L3MBTL4_2	AAAAGGGTGGGCTGACACCG	23	32	43	18
ZNF350	ZNF350_7	AAAAGTCAGTTACCTGGGCC	2	27	10	10
LBX2	LBX2_2	AAAAGTGTCGAGGAGGGCGT	61	90	157	43
ZNF451	ZNF451_4	AAAAGTTCATTCCGAAGAGG	8	12	21	4
ZNF528	ZNF528_1	AAAATAGCAAACGATCCAGA	9	15	22	3
ZNF709	ZNF709_3	AAAATCAGGGGAGAAAGCTA	31	69	96	14
ZC3H8	ZC3H8_6	AAAATGAAGCGAAAATGGCC	7	4	10	0
ZNF805	ZNF805_7	AAAATGAGCCCCAAACATGA	18	26	54	9
ZNF460	ZNF460_1	AAAATGAGCCTTGAACACGA	26	34	24	10
ZNF728	ZNF728_4	AAAATGATCAGGTCTGGCTT	64	42	110	15
ZNF836	ZNF836_4	AAAATGCCAAACAGTGACGC	1	17	4	2
TCF7L2	TCF7L2_2	AAAATGCCGCAGCTGAACGG	18	7	87	1
HEYL	HEYL_6	AAAATGCTCCATGCCACTGG	128	59	369	19
HEY1	HEY1_4	AAAATGCTGCATACGGCAGG	31	37	49	25
ZBTB2	ZBTB2_2	AAAATGGATTTGGCCAACCA	5	19	18	2
SRY	SRY_5	AAAATGGCCATTCTTCCAGG	22	52	46	10
NEUROD6	NEUROD6_4	AAAATGGGTTGCCTAGAAGG	6	5	13	4
ZNF205	ZNF205_1	AAAATGTCTGCAGACGGCGG	28	96	73	30
ZNF286B	ZNF286B_5	AAAATTGGAGCTCTGGCTGA	3	1	3	0
SOX6	SOX6_1	AAAATTGGGATCATGAGCGG	5	34	5	8
ZBTB33	ZBTB33_4	AAACAAGGCCAATGAAGAGG	7	0	15	3
ZNF586	ZNF586_3	AAACACAGGAATGTTCGCAC	34	90	101	30
CASZ1	CASZ1_5	AAACAGACTCCATCACCACG	39	78	69	22
ZGLP1	ZGLP1_3	AAACAGCTGAACCCCTGCCG	11	4	17	1
REXO4	REXO4_1	AAACAGTTGGGTCAGAGCGA	10	8	26	1
ZNF674	ZNF674_6	AAACATCAGAGAAGTCACAC	15	9	25	3
ARNTL2	ARNTL2_4	AAACCACAGGAGCAATGCAC	4	16	16	5
ZNF92	ZNF92_6	AAACCCTGCAAACATGAATG	8	26	12	11
ELK3	ELK3_2	AAACCGACAAGCACGTCACC	29	36	125	15
BSX	BSX_3	AAACCGTGCGGGCTTTGCGG	32	104	108	32
ZNF823	ZNF823_1	AAACCTCCGAAGACACATGG	4	10	0	5
ZNF57	ZNF57_1	AAACCTTGCGAGTCCACATG	47	53	159	25
ZNF491	ZNF491_3	AAACGAAGTGGAACAAGTGA	24	56	107	23
TAL2	TAL2_7	AAACGGGAGTGGCTGCTCAG	32	33	132	10
ZNF280C	ZNF280C_7	AAACTCACTTTTGCTCCAGG	14	93	37	40
PHOX2B	PHOX2B_3	AAACTCTTCACGGACCACGG	18	18	55	3
ZNF615	ZNF615_6	AAACTGAGACAACTTGAGGA	1	0	0	0
ZBED9	ZBED9_1	AAACTGAGGATATCCGAAAG	10	43	11	19
CEBPZ	CEBPZ_7	AAACTGGAACAGTTGTCCAG	1	0	6	0
NR1D1	NR1D1_4	AAACTGGGAGAAGCCCACCA	20	24	48	0
TCF7L2	TCF7L2_4	AAACTTTCGGAGCGAGGCGG	3	0	2	0
ZNF727	ZNF727_4	AAAGAAAGACTACCAACGTG	64	76	165	16
RBPJ	RBPJ_2	AAAGAACAAATGGAACGCGA	21	146	57	49
SMAD9	SMAD9_5	AAAGAAGAAGAAGGGAGCCA	9	0	13	2
ZBED6	ZBED6_3	AAAGAAGTGCCACACAATGG	71	64	176	30
ZUFSP	ZUFSP_3	AAAGACAACACCCTACAGTG	52	73	134	34
ZFP62	ZFP62_1	AAAGACAGAACAGGAAGGTG	24	0	89	2
SP100	SP100_4	AAAGACATTTCCATTCCTCG	78	212	292	48
ZNF518A	ZNF518A_1	AAAGACTGTAAGCTGTGTAG	82	148	128	44
GCM2	GCM2_1	AAAGAGAATTCGAGAATCCG	6	21	26	8
PATZ1	PATZ1_4	AAAGAGCATTATATCGGCGC	2	0	1	0
SKOR1	SKOR1_4	AAAGAGCCTGGTCCAGGCAG	74	84	177	38
L3MBTL4	L3MBTL4_5	AAAGAGCGTTTGGATCAGGA	0	23	4	9
PHF20	PHF20_5	AAAGAGGCATGTCCAAACCA	7	12	34	0
ZIC1	ZIC1_5	AAAGAGGCTGTGCTGTGCGC	51	39	151	12
CREBZF	CREBZF_6	AAAGAGTCCCCGGAAGGCGG	156	151	422	62
ZNF136	ZNF136_1	AAAGATCACTACAAACACCG	50	244	138	84
BBX	BBX_3	AAAGCAAAAGAATCCGATGG	6	25	19	17
ZBTB21	ZBTB21_4	AAAGCACACAACACATTCCC	11	19	27	9
ZNF518B	ZNF518B_1	AAAGCACACCCTTCAACACG	12	31	37	7
TSHZ1	TSHZ1_6	AAAGCAGCCCGACTCTCCCG	51	38	136	22
ZNF865	ZNF865_7	AAAGCAGCGTCAAAGAGGGG	11	14	21	5
ZNF14	ZNF14_3	AAAGCAGTGGTGATAACTGA	18	32	43	12
MEIS1	MEIS1_6	AAAGCAGTTGGCACAAGACA	0	57	2	18
ZEB2	ZEB2_2	AAAGCATCTGGAGTTCCAGG	2	2	1	6
ZNF668	ZNF668_4	AAAGCCAGAGACAGAAGCTA	3	1	8	1
TTF1	TTF1_1	AAAGCCAGGACTCCTCCTGG	0	1	0	1
TMF1	TMF1_2	AAAGCCAGTTCGGAGGACTG	8	79	11	31
ZNF699	ZNF699_6	AAAGCCATGAGAGACATTTG	43	94	103	30
ZBTB43	ZBTB43_5	AAAGCCCAAGAACTGAGAGA	2	0	2	0
ZNF319	ZNF319_6	AAAGCCCTTCAAGCACCTGT	12	157	36	58
ZSCAN31	ZSCAN31_7	AAAGCCTTCAGTGCCAGCAA	14	38	44	7
ZNF189	ZNF189_5	AAAGCCTTTAGTAGAAGCTC	31	19	62	2
ZBTB24	ZBTB24_5	AAAGCGCCCTGGAGGCCCTG	12	4	23	3
NFIA	NFIA_5	AAAGCGCCTCAAGTCTGTGG	17	11	49	7
BHLHE40	BHLHE40_5	AAAGCGGAGCGAGGACAGCA	43	21	80	11
RUNX3	RUNX3_7	AAAGCGGTCAGGGAACGGCT	11	8	5	2
ZNF512	ZNF512_1	AAAGCTCAGGTGCATGCGTG	17	6	45	5
ZNF667	ZNF667_1	AAAGCTCCTACACGAAAGAG	2	1	16	1
NRF1	NRF1_2	AAAGCTGCAAGCCCATCTGG	2	0	4	0
STAT1	STAT1_6	AAAGCTGGTGAACCTGCTCC	43	62	85	15
ZNF45	ZNF45_6	AAAGCTGTGGATGATGAAGA	2	0	0	0
ZNF676	ZNF676_2	AAAGCTTGAGGACCAGGTGA	51	80	174	21
ZBTB7B	ZBTB7B_6	AAAGCTTTCCTGCAAACCAA	18	95	27	18
ZNF439	ZNF439_4	AAAGGAACCGGAACGAGTGA	27	49	86	17
ZNF709	ZNF709_5	AAAGGAACGTGAGCAACTGA	0	0	0	0
ZNF44	ZNF44_5	AAAGGAACTGAGAGAACTGA	13	38	11	11
ZNF844	ZNF844_7	AAAGGAACTGGAACGATTGA	65	76	192	27
ZNF266	ZNF266_7	AAAGGAACTGGAAGAACTGA	6	14	35	8
HOXD8	HOXD8_4	AAAGGAAGCCCAAGAGCTGG	38	93	94	29
ZNF844	ZNF844_3	AAAGGAATGGAACCATCTGA	27	15	26	4
ZNF433	ZNF433_6	AAAGGAATGGGAAGAGCTGA	23	17	25	4
AKAP8	AKAP8_6	AAAGGAGAAGAGACAGGACG	58	65	86	17
TFDP1	TFDP1_3	AAAGGAGAGAAGAATGGCAA	5	6	12	0
MYOD1	MYOD1_6	AAAGGAGCAGAGAGAGCCGT	9	3	5	3
BPTF	BPTF_1	AAAGGAGCAGAGCAAAACCG	4	5	11	0
ZNF175	ZNF175_5	AAAGGAGCCGCGTGTGGAGG	10	21	39	16
ZNF440	ZNF440_4	AAAGGAGGGGCGGTATCTGA	6	20	30	4
ZHX1	ZHX1_7	AAAGGATTCCAGGATTGCTT	13	63	16	37
RBPJL	RBPJL_6	AAAGGATTGGGAGGCACTGA	58	100	210	35
ZNF804B	ZNF804B_7	AAAGGCCCTGGAAGATGTAA	12	19	59	2
BARHL2	BARHL2_4	AAAGGCTGCAAACTTTGCGT	37	14	106	6
DMRTC2	DMRTC2_5	AAAGGGAACCACTCAGCCAC	4	0	0	0
YY2	YY2_5	AAAGGGAAGAAACTTCCTCC	25	80	107	22
MBD2	MBD2_3	AAAGGGACCGGCTCCCGCCG	28	100	102	35
ZBTB26	ZBTB26_5	AAAGGGCATAATTGTGGAGA	22	47	40	20
SKOR1	SKOR1_5	AAAGGGGAGACACGCCCCAG	21	4	14	0
PRDM9	PRDM9_1	AAAGGGTCATGCATACAAAG	51	66	124	36
ZNF682	ZNF682_2	AAAGGGTGAACACCAGTGAA	26	50	116	13
ZNF561	ZNF561_3	AAAGGTAGAAAGGATGGTGG	25	44	55	4
KLF7	KLF7_7	AAAGGTCTCTGAGATCCTCC	5	2	37	2
NFYB	NFYB_6	AAAGGTGCCATCAAGAGAAA	67	137	181	52
ZNF627	ZNF627_7	AAAGTAAGTGGATCGACTGA	46	17	91	7
THAP11	THAP11_1	AAAGTAGCGCGCAGACCCGC	31	17	24	4
SPDEF	SPDEF_3	AAAGTAGGAGAGGTAGAAGG	15	17	45	1
ZNF625	ZNF625_4	AAAGTAGGGGAGATCACTGA	8	11	42	1
HSF2	HSF2_2	AAAGTAGTACATATCGACTC	14	21	69	17
ZNF347	ZNF347_2	AAAGTCATCCTCACCCAGGG	40	57	74	26
KMT2A	KMT2A_6	AAAGTCCGGAAAGACAAGGA	19	4	53	3
ZNF488	ZNF488_1	AAAGTCGACCCCAACAAGCG	15	8	50	3
ZBTB18	ZBTB18_1	AAAGTCGAGAGTCTCTCCGA	47	114	139	39
ZNF180	ZNF180_4	AAAGTCGAGGGAGAAGACAC	38	49	54	13
IRF1	IRF1_6	AAAGTCTCCATAGACAGAGG	18	48	15	15
GBX1	GBX1_3	AAAGTCTCTGAGAAGTGCGG	49	98	155	36
ONECUT2	ONECUT2_6	AAAGTCTGGGCACTTTGCAC	7	1	10	4
ZNF562	ZNF562_7	AAAGTCTTCACCTTAACTCC	15	57	56	13
ZNF138	ZNF138_4	AAAGTGACACTGAGCAGATA	33	76	108	51
ZBED6	ZBED6_1	AAAGTGAGCGTGAAGACCGC	4	27	10	13
ZNF267	ZNF267_5	AAAGTGATATCGAGGAGACA	20	18	41	1
ZNF557	ZNF557_4	AAAGTGATGACAGAAGAGAG	19	13	51	6
NR3C1	NR3C1_2	AAAGTGATGGGAAATGACCT	66	123	137	39
ZSCAN16	ZSCAN16_3	AAAGTGCAGTCCTCACAGGA	32	39	105	10
ATF3	ATF3_3	AAAGTGCCGAAACAAGAAGA	19	53	23	7
ZNF138	ZNF138_5	AAAGTGCTGAAACAAATGGC	22	33	90	8
PGR	PGR_4	AAAGTGCTGTCAGGCTGGCA	45	43	118	10
MSX1	MSX1_2	AAAGTGGAGGACTCCGCCTT	28	32	75	13
HOXB5	HOXB5_4	AAAGTGGCTGGAGGAGGCCG	56	130	155	48
SMAD9	SMAD9_2	AAAGTGGGCAGAGAAGGCAG	144	57	292	24
NKX2-1	NKX2-1_2	AAAGTGGGCATGGAGGGCGG	7	8	1	0
KCMF1	KCMF1_3	AAAGTGGTGCAACAACAACA	11	41	36	20
PRDM14	PRDM14_5	AAAGTGTCAGGTCCACAACA	2	4	3	0
HOXA9	HOXA9_7	AAAGTGTGAGTGTCAAGCGT	0	54	2	35
ZBTB32	ZBTB32_6	AAAGTTCAGGAGCTGGGCAA	1	4	9	2
FOXD1	FOXD1_1	AAAGTTCTCGACACTGGACA	16	50	61	8
ZNF292	ZNF292_2	AAAGTTGACGACACCTCTCA	71	44	122	18
MEF2A	MEF2A_2	AAAGTTGACTGAAAATGGGG	9	1	2	3
ATOH1	ATOH1_5	AAAGTTGCAGGTGGCTGCGG	34	83	102	17
GPBP1L1	GPBP1L1_4	AAAGTTGCAGTTTGAAGAGG	4	35	13	6
GPBP1	GPBP1_5	AAAGTTGCCAACGCCAAATG	20	28	87	10
ZNF91	ZNF91_2	AAAGTTTTCCTTACCCAGGA	59	74	158	12
TFCP2	TFCP2_1	AAATACAGTGGAGTTCCTGT	15	66	51	18
TMF1	TMF1_5	AAATAGGCTGTGTAAACTGG	2	58	47	16
FOXB2	FOXB2_2	AAATAGTGTACCATGTGCGG	10	8	44	0
ZNF566	ZNF566_7	AAATATCAGAGCCATGGCTC	19	3	20	1
ARID5B	ARID5B_4	AAATATGTTTCCACTGACGG	11	70	19	17
ZHX3	ZHX3_7	AAATCAACCTGAAGAACCTG	71	96	136	47
OTX2	OTX2_3	AAATCAACTTGCCCGAGTCG	8	5	26	5
ZNF567	ZNF567_5	AAATCATTCCTTCAAAGGGG	20	6	77	1
ZIC5	ZIC5_2	AAATCCGCTAATCTCAGCGC	2	10	21	5
SP110	SP110_5	AAATGACCCAGAAGAGCCCC	44	83	168	23
ZNF426	ZNF426_7	AAATGCGACTTGAAACCCAG	19	82	73	40
JRKL	JRKL_4	AAATGGAGATGAGACTGCGG	14	18	68	13
CREB5	CREB5_3	AAATGGGAACATGAACACCA	27	61	134	24
ZNF823	ZNF823_5	AAATGGGAGGACCAGAACAT	88	63	124	29
ZBTB26	ZBTB26_7	AAATGTACAAGACCTCACAG	10	36	97	9
ZNF560	ZNF560_1	AAATTATCTTGCCAAAGGGC	12	16	37	7
KLF12	KLF12_5	AAATTCATGGGACTTGAAGG	5	22	6	16
POU4F3	POU4F3_5	AAATTCTCCAGTCTGCACTC	46	161	167	48
CREB3	CREB3_5	AAATTCTGAAACGTGTGCGG	11	35	29	11
ZNF181	ZNF181_5	AAATTGCAGAGTAATGCCTC	20	117	23	24
NKX2-3	NKX2-3_1	AAATTGCGTCCCCTCAGCGG	53	129	187	39
E2F6	E2F6_6	AACAAAAGGTCTGAAGGTGT	6	26	12	3
LMX1A	LMX1A_6	AACAAACTCATTGGGAGCGA	1	1	3	0
ZNF574	ZNF574_7	AACAACAGTGGAGAAGCAGG	45	21	103	12
ZFP1	ZFP1_2	AACAACTGGACCCCTCTCAG	73	125	222	19
NKX3-2	NKX3-2_1	AACAAGAAAGAGGAGCGCGG	20	64	61	23
UBP1	UBP1_7	AACAAGAATGTGAATACCGG	72	169	134	39
ARHGAP35	ARHGAP35_6	AACAAGAGAGGAGACACCAG	4	2	11	2
TFAP2A	TFAP2A_5	AACAAGGACAACCTCTTCGG	69	55	205	15
AIRE	AIRE_7	AACAAGGCCCGCAGCAGCAG	12	51	27	14
SP3	SP3_6	AACACACTTAAGAGTACAGG	14	46	44	13
CLOCK	CLOCK_3	AACACCAACCAAGATCCCGA	28	149	79	27
ZNF136	ZNF136_5	AACACCGAGGGAGAAATCTA	19	45	35	24
ZNF547	ZNF547_5	AACACTCCACTCACCTGTGC	82	78	227	20
DACH2	DACH2_5	AACACTCCCAAAGAACGCTT	79	125	215	40
TSC22D1	TSC22D1_6	AACACTGCTAACAGCAGCAG	9	7	29	7
MYRFL	MYRFL_1	AACAGACTTGTGTCCAGGGC	27	36	45	7
ZNF721	ZNF721_1	AACAGAGAGAAAGCTTACAC	15	52	41	4
TIGD6	TIGD6_1	AACAGATTTAGAGATCGCCA	2	13	15	0
HSF2	HSF2_1	AACAGGAAACTATTGAGTCC	48	72	127	27
REPIN1	REPIN1_5	AACAGGCACACTGGAAGGGG	3	10	3	3
FOXK1	FOXK1_1	AACAGGCATTCCGGAAACGG	109	81	272	27
CCDC169-SOHLH2	CCDC169-SOHLH2_1	AACAGGTGGATCAACTGCCT	41	106	116	40
TOPORS	TOPORS_2	AACAGTACTCCACTATCCGG	4	9	31	11
ZNF286A	ZNF286A_6	AACAGTGACATTCAAGGATG	22	3	37	6
ZNF790	ZNF790_2	AACATAAACAGTCAAGGCTG	18	2	101	2
ZNF804A	ZNF804A_4	AACATCAAGGGAGTTTTCCG	10	18	15	1
LHX3	LHX3_4	AACATGAAGCGCTCCCGCGG	15	13	24	3
GPBP1	GPBP1_4	AACATGTGCTCCCTTAACTG	17	3	49	0
ZNF107	ZNF107_1	AACATGTGGATGAGTGTACG	39	68	79	18
ZNF148	ZNF148_6	AACATTGACGACAAACTGGA	5	4	20	2
NR1H3	NR1H3_6	AACATTGTAGTGGAAGCCCG	0	4	0	5
THAP5	THAP5_4	AACCAAGATACAGGTAGAGG	38	17	89	4
FOXP1	FOXP1_6	AACCACCAGCATGCACACGG	41	111	100	48
ISL2	ISL2_1	AACCAGACGCGGATGACCCG	13	28	70	12
MITF	MITF_4	AACCATCTTAAAAGCATCCG	31	105	51	24
ETV2	ETV2_5	AACCCGGGGCTGCATGCGGG	18	2	12	0
ZNF599	ZNF599_7	AACCCTCCACTCACCAACGC	0	0	0	0
NEUROD6	NEUROD6_7	AACCGAGAAAGAAGAAGAGG	0	0	0	0
HOXC8	HOXC8_2	AACCGGCAGTCGTAATAGGC	7	5	21	1
USF3/KIAA2018	USF3/KIAA2018_2	AACCGGGAGACACACAATGC	2	5	0	0
TBPL1	TBPL1_2	AACCTAGTTTCTGCAGACTA	7	24	36	20
ZNF674	ZNF674_7	AACCTCAGTGCAGTGAACAT	27	37	93	26
RORB	RORB_1	AACCTGAACAACGAGACCAG	18	27	61	5
ZBTB47	ZBTB47_7	AACCTGAAGAAGCTGGGCGG	17	68	44	29
ZNF215	ZNF215_2	AACCTGAATTCATTGCGTAA	20	36	40	20
ZNF639	ZNF639_6	AACCTGTAGAAAAGGCAGTG	35	29	94	9
ZNF101	ZNF101_3	AACCTTCAGGAACCTGGCCT	69	114	190	28
ZNF177	ZNF177_6	AACCTTCCAGGAAGTGGCAG	2	21	6	7
ZNF558	ZNF558_7	AACCTTCGAGGATGTGGCCG	41	33	59	18
NR1I2	NR1I2_4	AACGCAGATGAGGAAGTCGG	35	49	88	14
ZNF644	ZNF644_7	AACGCTAATCTTCCACGGAC	11	20	50	6
ZNF625	ZNF625_7	AACGCTCGAGGCACATCCAA	17	69	32	18
YY1	YY1_4	AACGCTGGTCACCGTGGCGG	4	47	18	11
POU4F2	POU4F2_3	AACGCTGGTGGTGGCGGCGG	23	51	108	12
SOHLH1	SOHLH1_4	AACGGAGGCCAGGACAGGGG	0	0	0	0
RFX7	RFX7_1	AACGGATTCCTGCATTCAAC	34	193	67	63
PCGF2	PCGF2_2	AACGGCTCCAATGAGGACCG	1	2	0	0
PAX6	PAX6_6	AACGGGCAGACCGGAAGCTG	20	25	67	1
EGR1	EGR1_3	AACGGGTCAGAGATCTGCAG	44	77	177	28
ZNF721	ZNF721_3	AACGTGGCAAAGACTTTGGA	140	104	329	26
ZNF99	ZNF99_7	AACGTGGCAAAGCCTTTAAA	0	0	0	0
TRPS1	TRPS1_3	AACGTTGCAAGTGAAGGCGA	31	34	110	10
ZNF521	ZNF521_1	AACTAGAGGACAGAAACCCA	3	0	0	0
ZNF233	ZNF233_4	AACTCAACTCACCTGAAACT	14	10	47	1
ZBTB3	ZBTB3_2	AACTCCATAGTACCCCACGA	49	92	144	28
HOXA5	HOXA5_1	AACTCCCTAAGCAACTCCAG	47	186	207	38
DMRT3	DMRT3_7	AACTCGGCAGCAGGGCGCGG	122	105	328	30
TAL2	TAL2_1	AACTCTGCTTGAGAACTACC	5	8	24	5
SMAD4	SMAD4_1	AACTCTGTACAAAGACCGCG	18	138	56	36
ELF2	ELF2_7	AACTGAAGAGTCTGAACCCA	11	6	16	2
NR2C2	NR2C2_3	AACTGACAGCCCCATAGTGA	33	61	39	23
HOXC6	HOXC6_5	AACTGCAGACAAAACACCTT	4	0	0	1
RBAK	RBAK_3	AACTTACAGGGATGTGATGT	30	4	62	9
CDX4	CDX4_7	AACTTGGGCCCTGTGGGCGG	137	219	178	82
MYNN	MYNN_3	AACTTGTTCTACTACAGGTG	9	3	12	1
THAP2	THAP2_7	AAGAAAAGAATGGGTTCGCC	58	60	134	15
ZNF714	ZNF714_2	AAGAAAAGGCTCCGCAAATG	21	33	81	12
KIN	KIN_2	AAGAAAATCCGACTTCCCCA	9	5	29	1
HIC1	HIC1_1	AAGAAACGCCTCAAGCGCCA	5	22	25	6
EN2	EN2_4	AAGAAAGGCGGCGACCCCGG	23	16	29	11
PRR12	PRR12_4	AAGAAAGGGCCAGAGCGGGG	62	76	81	10
ZNF430	ZNF430_3	AAGAACAGGCTGTAAAAGTG	15	2	29	2
TIGD5	TIGD5_5	AAGAACCAGCCCCGCAGCAG	45	83	84	21
SP140	SP140_4	AAGAACCTGAAAATGGGCTC	15	44	36	5
AHCTF1	AHCTF1_3	AAGAACCTGAGAATGATCCT	2	0	0	0
CARF	CARF_1	AAGAACTTGGTAGATGCTGG	150	37	306	30
AKAP8L	AKAP8L_5	AAGAAGAAGAGAAAGCAGGG	8	1	12	3
ZNF280C	ZNF280C_5	AAGAAGAAGAGCTAGAGCCA	1	0	1	1
CXXC5	CXXC5_6	AAGAAGAAGCGGAAACGCTG	2	24	36	8
BARHL2	BARHL2_7	AAGAAGACGTGGAAGTCCTG	21	32	75	11
EEA1	EEA1_3	AAGAAGAGCAACAACTTCAG	0	1	10	0
ZNF280D	ZNF280D_4	AAGAAGAGGAGCTGGAACCA	21	38	60	9
YY1	YY1_5	AAGAAGAGTTACCTCAGCGG	19	186	74	77
HOXA4	HOXA4_6	AAGAAGATCCATGTCAGCGC	19	43	111	19
GLYR1	GLYR1_2	AAGAAGCATTTCTTTCCGCG	88	79	234	23
ZBTB7B	ZBTB7B_2	AAGAAGCTTTTCACTGAGGG	8	9	0	0
THAP7	THAP7_5	AAGAAGGACAACCCGAGGCG	19	29	66	4
GTF2IRD1	GTF2IRD1_7	AAGAAGGTGCAGCGGGGCGA	7	50	9	5
SOX3	SOX3_6	AAGAAGGTGCGCCAGCGTGG	31	104	53	35
PKNOX2	PKNOX2_1	AAGAAGTCCAAGAACAAACG	47	61	143	11
HIVEP1	HIVEP1_7	AAGAAGTCTCATCAAGGGCG	7	20	25	6
TWIST1	TWIST1_7	AAGAAGTCTGCGGGCTGTGG	46	107	76	24
MBD3	MBD3_2	AAGAAGTGCCCAGAAGGTCG	19	57	44	37
ZNF541	ZNF541_2	AAGAAGTTTAGAACCACAGG	39	46	60	14
ZNF66	ZNF66_1	AAGAATAGAGGACCGACTGA	6	3	0	4
SP1	SP1_3	AAGAATCGCACAGTCTCTGG	0	0	1	0
ZNF280D	ZNF280D_3	AAGAATGGTGCACTCAGTCG	1	1	2	4
POU2F2	POU2F2_3	AAGAATGTCTAAGCCCCTGG	2	7	12	2
ZNF17	ZNF17_4	AAGAATTCCCCACTCCTCCT	24	58	96	22
REL	REL_6	AAGAATTGTGGAAGTGTCAG	9	4	46	3
HBP1	HBP1_7	AAGACAAAGATGCACGACGC	29	10	76	1
ZNF221	ZNF221_4	AAGACAACAAGCCAAAGAGA	10	60	32	8
ZNF224	ZNF224_4	AAGACAGCAATCCAAAGGGA	13	17	21	2
ZNF727	ZNF727_7	AAGACAGTAGCCAAACACCC	8	37	5	11
ZNF564	ZNF564_2	AAGACCAGAGCATTGAAGAT	0	0	0	0
ZNF627	ZNF627_1	AAGACCCATTCAAAATTCCC	20	62	106	14
OTP	OTP_5	AAGACCCGGACAAGCAGCCC	11	23	38	3
NME2	NME2_1	AAGACCGACCATTCTTCCCT	13	74	46	10
EN2	EN2_2	AAGACGCTCTCGCTGCACGG	44	69	80	35
HMBOX1	HMBOX1_4	AAGACGGTCCAAAGTTTCCA	18	43	29	15
GATA2	GATA2_1	AAGACGTCCACCTCGTCTGG	2	0	0	0
FOXK2	FOXK2_5	AAGACTGGCTGACTGGACAG	7	31	28	4
ZNF561	ZNF561_5	AAGACTTGTGGATGTAGTGA	68	228	110	67
FOS	FOS_6	AAGAGAAAAGGAGAATCCGA	5	7	18	4
NFX1	NFX1_1	AAGAGAAATGCACTGTACGG	77	146	171	51
ZNF195	ZNF195_2	AAGAGACAGGAGGCAGCAGA	22	40	72	14
GMEB1	GMEB1_1	AAGAGAGCTATTCGTCTGGG	62	82	91	24
ZNF860	ZNF860_7	AAGAGATATCCACAGAATGC	2	4	0	0
ZNF578	ZNF578_4	AAGAGATGACCTGTGACTGA	23	85	77	16
ZSCAN25	ZSCAN25_4	AAGAGCACTGGAGGCCAAGG	9	66	24	31
ZFP82	ZFP82_2	AAGAGCCTTGGAAAGTTGTG	43	129	74	37
ZNF43	ZNF43_2	AAGAGCCTTGGGAGCCTATG	3	0	0	0
LHX4	LHX4_5	AAGAGCGTCAAGAGGAGCCG	0	0	0	0
ZNF614	ZNF614_2	AAGAGCGTGCAGCAATGCAA	43	71	51	53
RORA	RORA_4	AAGAGCTCCAGCAGATAACG	26	25	60	0
RFX5	RFX5_1	AAGAGGACGAACATGCACCT	50	106	168	25
FOXR2	FOXR2_7	AAGAGGAGACCCAGTCCTGA	3	11	11	8
NR0B1	NR0B1_7	AAGAGGCGCTACCAGGCGGG	39	22	50	15
TCF12	TCF12_7	AAGAGGCTCTTACCAGGGAG	29	15	149	8
ZNF24	ZNF24_2	AAGAGGGATCAAGTATCCCC	50	58	183	20
EBF1	EBF1_3	AAGAGGGCGTACCTTCCGAG	0	0	0	1
POU2F1	POU2F1_5	AAGAGGGGAGGACAAAGGAG	0	0	0	0
MBD1	MBD1_3	AAGAGGGTGAGATCACACGC	71	160	240	71
ZNF497	ZNF497_4	AAGAGGGTGGACCCTGCAGG	5	14	3	1
NFKB2	NFKB2_2	AAGAGGTGCAGCGGAAGCGG	6	9	0	1
ZNF208	ZNF208_7	AAGAGTCGAGACCTTACTAA	49	19	128	7
ZNF318	ZNF318_4	AAGAGTCGTCGGCCCCGCGG	15	37	85	18
ZNF280C	ZNF280C_1	AAGAGTGAGCCACACAGTCC	33	47	97	11
ZNF430	ZNF430_5	AAGAGTTGAAGACTGGCTAA	74	40	232	6
ZNF679	ZNF679_4	AAGAGTTGAGGAGAAGGCAA	14	5	19	0
MYSM1	MYSM1_3	AAGATAAAGGGACAAAGGCA	13	4	12	1
XPA	XPA_4	AAGATAATTGACACAGGAGG	82	36	147	7
ZNF155	ZNF155_2	AAGATACTTGCCACTTCCTA	19	31	47	4
THAP6	THAP6_6	AAGATAGAAGGTATGACTCC	1	2	0	3
ZNF136	ZNF136_2	AAGATCACTACAAACACCGA	4	6	8	6
ZNF442	ZNF442_2	AAGATCAGCACAGAAATCCC	9	24	30	9
LMX1A	LMX1A_1	AAGATCAGCAGAACACCCAG	35	13	79	6
ARID3B	ARID3B_3	AAGATCAGGATCAACGGCAG	3	0	0	0
KMT2A	KMT2A_1	AAGATCAGTAGCGGTCCCGG	11	28	77	2
ZNF141	ZNF141_3	AAGATCGTAGCCAGACCCCC	55	93	199	27
ZBTB14	ZBTB14_3	AAGATGAACAGACACCAGGC	46	98	99	43
ZNF14	ZNF14_2	AAGATGACCACAGAAACCAG	28	88	130	19
ZNF367	ZNF367_4	AAGATGACGGGCGGCGGCGG	18	16	42	7
ZNF878	ZNF878_1	AAGATGAGCACCAAAATCCT	19	42	68	8
ZNF80	ZNF80_1	AAGATGAGCCCTAAACGCGA	5	0	3	1
ZNF703	ZNF703_2	AAGATGCTGAGCGCTCACAC	22	68	60	39
PLAGL1	PLAGL1_1	AAGATGCTTCTACACCCGGA	17	20	64	11
CREB3L1	CREB3L1_4	AAGATGGAGGACACCACCCA	69	64	152	20
PURB	PURB_2	AAGATGGCGGACGGCGACAG	9	11	8	3
ARID5A	ARID5A_4	AAGATGGCTAAGGAGAACAG	3	0	1	0
BARX2	BARX2_2	AAGATGGTGCGACTCCGGCG	45	20	81	8
ZNF883	ZNF883_2	AAGATGTGCACTCCGATTGA	28	21	97	13
REPIN1	REPIN1_7	AAGATTCACAAGCGATCCGA	71	125	181	40
DUXA	DUXA_2	AAGATTCCTGAGGGACTGCA	28	15	38	11
ZNF439	ZNF439_6	AAGATTTGGGGCAGATCTGA	22	17	12	1
ZNF320	ZNF320_4	AAGCAACGAGCAACTCTTGC	8	3	20	6
ZFP1	ZFP1_6	AAGCAAGAGAAAACCCACAG	1	0	0	0
ZNF677	ZNF677_2	AAGCAAGGGATTATCACCAA	67	53	134	32
GZF1	GZF1_6	AAGCACAGCAAGCACCGCCA	32	47	94	14
SP6	SP6_3	AAGCACATGAAAACCCACGA	0	0	10	4
GRHL1	GRHL1_2	AAGCACTTTATCCACAGCGG	82	51	253	28
GABPA	GABPA_4	AAGCAGAGTGCACAGAAGAA	20	88	26	36
TERF2	TERF2_5	AAGCAGATTGGTCTTGGAGG	3	3	0	0
ZBTB25	ZBTB25_5	AAGCAGCAAGCACTGCTCTG	9	8	7	2
FOXF1	FOXF1_2	AAGCAGCAGCCACCGCACGG	15	54	98	25
ZSCAN31	ZSCAN31_6	AAGCAGCAGGCACATTCCAC	44	26	105	3
TCF7L2	TCF7L2_7	AAGCAGCCGGGAGAGACCAA	8	48	20	11
HMGA1	HMGA1_5	AAGCAGCCTCCGGTGAGTCC	14	15	37	5
GCM1	GCM1_1	AAGCAGGTCTCCACTACTGT	35	26	107	17
ZNF569	ZNF569_7	AAGCAGTGAGCACTGAGAGA	69	63	185	21
ZBTB33	ZBTB33_1	AAGCATCTCAGGTACAGCGC	95	66	242	12
ZNF266	ZNF266_6	AAGCATGCACGAACTCACAG	31	48	35	17
ZNF569	ZNF569_5	AAGCATGGAAAACTGAGAGA	21	11	31	8
ZNF878	ZNF878_6	AAGCATGTAAGGACTCACGC	8	12	34	4
ZNF35	ZNF35_5	AAGCCATGGCCCTAGCCCCA	5	9	10	3
ZNF410	ZNF410_7	AAGCCCCTGTCCCAATGGGA	59	118	141	25
ATOH8	ATOH8_7	AAGCCCTGCAGCAGACCCGG	39	98	95	25
JDP2	JDP2_6	AAGCCCTGGCAGGGAGCCTG	6	20	21	5
NME2	NME2_3	AAGCCGGACGGCGTGCAGCG	71	96	147	24
SP1	SP1_1	AAGCCGGTCGGAGGACCCGG	9	18	9	8
ZNF28	ZNF28_6	AAGCCTACGATGGCGTGCAA	8	17	24	4
ZNF28	ZNF28_4	AAGCCTATGATGGTATACGA	11	16	13	15
ZNF879	ZNF879_1	AAGCCTTCACTTCAATATCG	26	58	83	11
POU2AF1	POU2AF1_6	AAGCGAGGCCACGCCAGCAG	44	54	182	18
ZNF468	ZNF468_7	AAGCGATGATGTCTGACCGA	102	96	358	29
SEBOX	SEBOX_4	AAGCGGACCACCTTCAGCAA	41	36	88	14
ARX	ARX_7	AAGCGGAGTCGAGCGCCGGG	166	158	409	58
ZNF444	ZNF444_5	AAGCGGCGGAAGCGGTGCCA	134	321	328	117
ZNF493	ZNF493_5	AAGCGGTCCTCACACCTCGC	24	48	62	15
NFE2L3	NFE2L3_7	AAGCGGTGGTGGTCGGCCGG	25	37	34	16
TFAP4	TFAP4_7	AAGCTCAGGTACCTGCACGA	8	2	17	3
PURB	PURB_1	AAGCTCATAGACGACTACGG	99	57	371	21
IKZF2	IKZF2_3	AAGCTCCACACTGGTTACAG	6	5	26	3
MGA	MGA_7	AAGCTGATGGAAACAAGCAT	11	7	29	7
ZNF780B	ZNF780B_1	AAGCTGATTGAGGAGACTAA	22	20	15	8
SPDEF	SPDEF_1	AAGCTGCTCAACATCACCGC	18	69	77	25
AEBP2	AEBP2_4	AAGCTGGAATGAACAAAAGG	0	0	0	0
ZNF780A	ZNF780A_7	AAGCTGGTTGAGAAGACTAA	2	24	33	4
ZNF704	ZNF704_3	AAGCTGTCAGCCGAGAGCGG	28	112	66	48
MAFB	MAFB_2	AAGCTGTCGAAGCTTTGCAG	18	23	50	5
ZNF780B	ZNF780B_7	AAGCTGTGTCAGAAGACCAA	7	29	25	10
ZNF680	ZNF680_5	AAGGAAAAGAGCCCTGGAAT	25	23	33	11
SP140L	SP140L_2	AAGGAAAGTGACCAAGCATG	18	47	72	14
ZKSCAN5	ZKSCAN5_4	AAGGAACTTGGAGAACAGGA	0	2	1	0
MBD6	MBD6_4	AAGGAAGCCACCAAAAGCGA	2	3	8	0
FAM200B	FAM200B_7	AAGGAAGCTCATTGAATAGC	24	62	49	19
ISX	ISX_2	AAGGAAGGAAGAGCAAGCGG	6	35	25	2
ZNF682	ZNF682_5	AAGGAAGGATGGGGAAAATG	6	6	10	1
ZNF440	ZNF440_7	AAGGAATGTGGGAAACCCTT	21	26	54	1
ZFPM1	ZFPM1_2	AAGGACAGGAACCAGAACCC	3	59	5	13
DMTF1	DMTF1_5	AAGGACATAAATGGAAGCAG	10	7	12	0
ZNF90	ZNF90_4	AAGGACTAAGGAGCGCCTGA	21	57	44	28
ALX1	ALX1_6	AAGGACTGACAGCTACCCAC	203	109	501	38
ZSCAN29	ZSCAN29_6	AAGGAGAAAGAACTTCCAAG	0	0	0	0
ZFP37	ZFP37_5	AAGGAGAAGCACCATGGTTG	11	10	28	6
HOXC9	HOXC9_4	AAGGAGACGGCGCCGGACAG	19	35	64	16
ZNF418	ZNF418_3	AAGGAGACTCCACTCCTCCT	9	6	20	3
NFATC1	NFATC1_2	AAGGAGAGACGGACATCGGG	19	80	55	16
HEY1	HEY1_6	AAGGAGAGTGCGGACGAGAA	2	19	14	0
CREBZF	CREBZF_3	AAGGAGAGTTGGAAGCCGGG	1	0	0	0
ZNF383	ZNF383_5	AAGGAGATCACTTGAGGCTT	2	42	7	8
ZIM2	ZIM2_5	AAGGAGATGTACCAACCAGA	26	13	109	9
PRDM15	PRDM15_1	AAGGAGCAGGACACACCCCG	15	52	80	17
IRF8	IRF8_4	AAGGAGCCCTTCCCCGCCGG	25	35	69	3
HEYL	HEYL_4	AAGGAGCCGAGCGGCTCCGA	33	29	73	16
TBX2	TBX2_3	AAGGAGCCGGCCGAGAGCGG	46	15	98	6
ZNF480	ZNF480_7	AAGGAGCGCAATCCTATAGA	12	5	43	1
ZNF235	ZNF235_2	AAGGAGCTTCAAACCCAAAG	15	15	29	2
ZNF541	ZNF541_6	AAGGAGGAAGGGCCACCTCG	26	47	55	31
CIC	CIC_3	AAGGAGGAGCAAGAGGGCGG	2	0	0	0
ZNF687	ZNF687_2	AAGGAGGTCATCAAAATCAG	1	15	0	1
GRHL1	GRHL1_4	AAGGAGGTGAGCAGCAGTGA	26	18	92	11
KMT2B	KMT2B_4	AAGGAGTAGGGGCCTCCGGG	3	13	3	4
SETDB2	SETDB2_3	AAGGAGTCTACGAAACGTGG	20	37	70	11
ZNF660	ZNF660_1	AAGGAGTGTGGGAAAACATG	32	81	92	39
AHCTF1	AHCTF1_7	AAGGATAACATCGTTACCAC	29	17	62	16
ZC3H8	ZC3H8_1	AAGGATCAAATGCTTTGCTG	43	37	146	7
ZNF676	ZNF676_3	AAGGATCGAGGACCAGCTGA	39	75	110	25
GATAD2A	GATAD2A_5	AAGGATGATCAAGCAGCTGA	5	27	11	6
ZNF136	ZNF136_6	AAGGATGGTAGTCAGCGTGG	2	0	3	0
CDX1	CDX1_3	AAGGATTCGCCCGTGTACCC	45	238	91	55
ZNF440	ZNF440_6	AAGGATTGACACAGCTCTGA	16	274	27	93
ZNF729	ZNF729_6	AAGGATTGAGGACTGACTAA	1	17	1	5
ZMAT4	ZMAT4_2	AAGGCAAAATCCACGCCAAG	60	42	168	17
ZNF570	ZNF570_2	AAGGCAACCAGGTAATCAGA	11	2	4	4
STAT4	STAT4_1	AAGGCAATTGGAGAAACTAG	5	36	50	9
ZNF124	ZNF124_1	AAGGCAATTGGAGTAACGGA	0	1	10	3
ZSCAN16	ZSCAN16_1	AAGGCAGAGGACCATTACTG	7	10	47	0
GLI3	GLI3_4	AAGGCAGGGAAAAGATGAGG	7	22	4	7
FOXF1	FOXF1_7	AAGGCAGGTGGGGCACCGAG	12	27	9	3
ZNF501	ZNF501_4	AAGGCATATGCTCTGACTGA	8	2	18	3
ASCL3	ASCL3_3	AAGGCATCGGGAAAGAGAAG	16	14	30	2
FOXF1	FOXF1_1	AAGGCCAAGAAGACCAACGC	27	79	104	18
ZNF490	ZNF490_4	AAGGCCGCACAGGAACAGGA	26	105	118	37
MBD2	MBD2_7	AAGGCCGCTGCCGCCACTCG	197	93	355	48
RARB	RARB_1	AAGGCCGTCTGAGAAAGTCA	16	82	76	24
ZNF121	ZNF121_7	AAGGCCTGAGCGCCCAGCGA	63	122	161	43
ZNF559	ZNF559_5	AAGGCCTGATGAGATACTGA	59	8	151	1
ZEB2	ZEB2_7	AAGGCGAGACAGCTCCTCAG	19	1	26	2
HOXD10	HOXD10_6	AAGGCGGCCTTCCCGAAGAG	24	43	58	7
GBX2	GBX2_2	AAGGCGGTGCTACTCCCCAG	15	7	32	2
CRX	CRX_5	AAGGCGTTGACAGAATAGTG	35	40	44	21
E2F8	E2F8_2	AAGGCTCTCAGGGAGAGCCG	7	10	14	2
DMRTB1	DMRTB1_1	AAGGCTGGGCATCGCCACGG	30	56	81	39
ZNF142	ZNF142_7	AAGGCTGTGGATAAAGGCCA	3	0	10	1
ZNF283	ZNF283_7	AAGGCTTGAACCCCAACTAA	48	46	132	15
ZNF677	ZNF677_7	AAGGCTTGAACGTTCAGCAA	17	108	63	30
ZNF728	ZNF728_7	AAGGCTTGAGGACCGGGTGA	62	211	114	78
ZNF140	ZNF140_2	AAGGGAAAGAACCCTGGCTG	10	48	17	14
ZNF440	ZNF440_1	AAGGGAACTGGAATGAGGGA	9	26	23	18
ZNF124	ZNF124_5	AAGGGAACTGGCGTATCTGA	7	8	10	0
ZNF891	ZNF891_4	AAGGGAAGAGGAAACACTGA	30	48	41	12
ZNF501	ZNF501_6	AAGGGAAGAGTTCTGAGTGA	4	25	20	9
ZNF669	ZNF669_5	AAGGGAAGTGGAACAGCTGA	60	18	224	6
ZNF454	ZNF454_3	AAGGGAAGTGTGGATGCCAG	10	10	46	5
AC008770.3/ZNF700	AC008770.3/ZNF700_5	AAGGGAATTGCAACATCTGA	45	92	110	31
RORB	RORB_6	AAGGGACAGCCTGTATGCTG	41	100	56	27
ZNF816	ZNF816_5	AAGGGATGACATCTGAGTGA	46	103	39	33
ZNF611	ZNF611_5	AAGGGATGACCTGCGACTGA	10	140	22	40
ZNF808	ZNF808_7	AAGGGATGACCTGTTACTGA	46	79	162	21
ZNF761	ZNF761_6	AAGGGATGACGTCCGACTGA	26	41	102	6
ZNF813	ZNF813_6	AAGGGATGACGTCTGACTAA	53	39	159	18
ZNF791	ZNF791_7	AAGGGATGAGAGACGCATGA	0	0	1	0
ZNF600	ZNF600_1	AAGGGATGATACCTGACTGA	1	14	13	2
ZNF569	ZNF569_6	AAGGGATGCAATTCGAGGGA	16	30	20	9
ZNF808	ZNF808_5	AAGGGATGCCCGGTGACGGA	12	33	63	17
ZNF354A	ZNF354A_1	AAGGGATGTACTGAGAGTAA	86	256	183	83
FOXA2	FOXA2_2	AAGGGCACGAGCCGTCCGAC	0	1	0	3
FOXA1	FOXA1_5	AAGGGCATGAAACCAGCGAC	92	124	217	53
ZNF845	ZNF845_6	AAGGGCTGAATTTCGACCGA	18	49	95	16
MEF2A	MEF2A_7	AAGGGCTGACAGGTCAGCGC	43	44	77	8
ZNF90	ZNF90_7	AAGGGCTGAGGAGTACTTGA	19	22	79	9
ZFP37	ZFP37_1	AAGGGGAAAAGACCCAGTCA	0	1	0	0
ZBTB45	ZBTB45_5	AAGGGGAAGAGTGCAACGGG	1	2	7	0
CIC	CIC_6	AAGGGGACTAAGGAGTGCCA	1	1	3	1
CREB3L1	CREB3L1_5	AAGGGGCTGAGGCCCAGCAG	2	1	5	1
TCF7L2	TCF7L2_5	AAGGGGTAGCCGGGATACGG	5	17	30	8
ZIC5	ZIC5_3	AAGGGGTGGGAGGAAGAGGA	0	0	0	0
SETDB2	SETDB2_5	AAGGGGTTTTATAACTCACG	68	32	182	11
ZNF124	ZNF124_7	AAGGGTACTAGCACGACTAA	3	17	15	8
ZNF20	ZNF20_1	AAGGGTAGTGGAACGAGTAA	25	30	64	2
ZNF486	ZNF486_7	AAGGGTATAGGGGTACATAA	3	3	4	1
ANHX	ANHX_3	AAGGGTCACCAGCTCCGCCG	3	3	28	4
ZNF285	ZNF285_5	AAGGGTGACATTCAAGGATG	11	5	19	2
THAP11	THAP11_5	AAGGGTGAGAAGCACGGCCG	38	12	59	3
ZNF100	ZNF100_5	AAGGGTTGAGAACCAGTTGA	165	37	197	8
ZNF260	ZNF260_4	AAGGGTTGAGAACTGAGAAA	29	109	86	40
ZNF728	ZNF728_2	AAGGGTTGAGAAGTTACCAA	62	41	176	28
ZNF208	ZNF208_1	AAGGGTTGAGACCTTACTGA	25	18	46	8
ZNF91	ZNF91_7	AAGGGTTGAGGACCAATGAA	3	11	5	1
ZNF93	ZNF93_5	AAGGGTTGAGGATGCAACAA	81	106	225	43
PLAG1	PLAG1_2	AAGGTAAGGACATCACCGGA	23	17	92	0
ZNF765	ZNF765_2	AAGGTACGACTTCTGACTAA	112	35	288	12
ZNF573	ZNF573_6	AAGGTAGCCATACAAGCTAA	18	26	83	5
ZNF570	ZNF570_7	AAGGTAGGCAAACTGGCTGA	50	24	120	2
ZNF737	ZNF737_6	AAGGTATGAAAACCGGCTAA	12	60	51	13
ZNF600	ZNF600_5	AAGGTATGACCTCAGACGGA	24	50	84	13
ZNF611	ZNF611_3	AAGGTATGACCTGTGACTGA	51	91	107	26
ZNF845	ZNF845_7	AAGGTATGACGTTTGACTGA	33	35	29	15
DMRT1	DMRT1_6	AAGGTCCGGGGAGGCCCCGA	9	27	11	4
E2F1	E2F1_2	AAGGTCCTGACACGTCACGT	11	18	25	5
ZNF705E	ZNF705E_7	AAGGTCGGAAGACAGACTGA	10	17	13	8
ZNF705B	ZNF705B_5	AAGGTCGGAGGACAGACTGA	13	13	54	2
ZNF404	ZNF404_7	AAGGTCTCCAACACGACTGA	17	1	59	4
ZNF626	ZNF626_5	AAGGTCTGAAGACCGCTTGA	76	64	209	36
ZNF727	ZNF727_5	AAGGTCTGAGAACCACCTAA	1	9	0	2
ZFP14	ZFP14_2	AAGGTCTGGACCACATACGA	39	58	169	30
ZNF253	ZNF253_6	AAGGTCTGTGGATCGGTTGA	14	75	54	27
ZNF124	ZNF124_4	AAGGTGACTGGAACGACTGA	0	9	15	5
ZNF669	ZNF669_7	AAGGTGACTGGAACGAGTGT	2	0	2	1
ZNF750	ZNF750_4	AAGGTGAGCCGGCTTTCCAG	5	0	0	0
TBX15	TBX15_6	AAGGTGAGTGTGCGCACAGG	43	36	89	14
ZNF33A	ZNF33A_2	AAGGTGCGAAGTCACACGGA	76	230	173	59
TIGD6	TIGD6_7	AAGGTGCGGGAGGCATCCGT	9	44	32	9
AC008770.3/ZNF700	AC008770.3/ZNF700_4	AAGGTGCTTCACATATCTGA	102	306	339	99
FOXR2	FOXR2_5	AAGGTGGCTACAATTGAGAG	2	0	0	0
ZNF607	ZNF607_1	AAGGTGGGAAAACTGACGAA	4	1	8	1
ZNF329	ZNF329_4	AAGGTGGGAGATGTCAGTGA	6	18	5	4
ZNF492	ZNF492_1	AAGGTGGGATAACTGGCTAA	47	34	60	22
ZNF781	ZNF781_1	AAGGTGGGCACGCTTTCTAA	26	164	29	45
ZNF558	ZNF558_3	AAGGTGGTGACAGAGGAAAG	2	0	0	1
LIN28B	LIN28B_3	AAGGTGGTGGAGAAGAGCCC	3	0	0	0
SALL1	SALL1_5	AAGGTGGTGGCACTGCCCGC	19	178	83	33
ZSCAN20	ZSCAN20_3	AAGGTGTCAGGTGTTCACTG	132	35	249	6
ZFHX2	ZFHX2_5	AAGGTGTCCGAAGGCAGGGA	3	3	3	6
ZNF708	ZNF708_5	AAGGTGTGAAGATAGGGTAA	15	80	28	35
ZNF730	ZNF730_4	AAGGTGTGAGAACCGCCTAA	29	82	47	22
ZNF626	ZNF626_6	AAGGTGTGAGGACCGCTTGA	7	33	58	11
ZNF90	ZNF90_6	AAGGTGTGAGGACCTGTTGA	18	36	31	22
ZNF737	ZNF737_7	AAGGTGTGAGGACGAGTTGA	3	69	11	11
ZNF681	ZNF681_2	AAGGTGTGAGGACTGCCTAA	47	38	97	15
ZNF486	ZNF486_5	AAGGTGTGAGGAGCGGGTGA	0	0	0	0
ZNF253	ZNF253_7	AAGGTGTGAGGATAGGTGAA	17	54	68	15
ZNF844	ZNF844_5	AAGGTGTGAGGCAGATGTGA	1	2	4	0
ZNF502	ZNF502_5	AAGGTGTGCATACTTGCGGA	13	42	32	10
ZNF454	ZNF454_2	AAGGTGTGCCCTGCACACAA	14	8	53	4
ZNF883	ZNF883_5	AAGGTGTGTACTTCGACTGA	11	14	45	7
GATAD2B	GATAD2B_7	AAGGTTCATATAGATGGCAG	28	212	49	77
ZNF440	ZNF440_2	AAGGTTCTGGGCAGATCCGA	18	7	57	7
NFX1	NFX1_3	AAGGTTGATTCTGAAGGCCA	68	109	259	37
HSF2	HSF2_7	AAGGTTTAAAGCCAAGGGAG	7	28	10	7
ZNF44	ZNF44_6	AAGGTTTCCAGGAGAACTGA	14	60	55	16
ZNF844	ZNF844_6	AAGGTTTCTGACAGATCCAA	37	4	93	5
ZNF573	ZNF573_7	AAGGTTTGAAGCACGACTGA	105	107	270	55
AC008770.3/ZNF700	AC008770.3/ZNF700_6	AAGGTTTGAGGCACAACTGA	16	21	19	10
ZNF728	ZNF728_5	AAGGTTTGCAACCTTACTGA	3	0	2	1
ZBTB40	ZBTB40_5	AAGGTTTGCACAGCAGGGGA	20	29	34	10
ZNF345	ZNF345_1	AAGGTTTGCACCACTACCAA	5	6	6	0
ZNF479	ZNF479_6	AAGGTTTGCAGACCAGCTAA	1	0	0	0
DR1	DR1_3	AAGGTTTTCCAAACGAGAAC	1	0	0	0
VAX1	VAX1_6	AAGTAAATCCAATTCCGCAG	7	18	34	8
VEZF1	VEZF1_6	AAGTAGAAACACTGAGACTG	21	22	44	8
ZNF404	ZNF404_1	AAGTAGATAGCTGCGAACAA	8	1	12	0
ZNF420	ZNF420_2	AAGTAGTAAGCCACGCGCAA	37	48	88	9
HLF	HLF_3	AAGTATCTCCGTCATAGGGA	11	11	5	1
ZNF800	ZNF800_1	AAGTCAGCCTGCGACTCCTG	46	40	128	11
ZNF789	ZNF789_3	AAGTCATTAGGCGTAAGGCA	26	84	82	43
PAX6	PAX6_1	AAGTCCCCGGATACCAACCA	43	106	134	44
PRDM5	PRDM5_5	AAGTCCTCCCGGGTTCAGGA	88	70	322	24
SHOX2	SHOX2_1	AAGTCGGACCAATTTCACCC	13	147	47	24
RHOXF2	RHOXF2_4	AAGTCGGCAGGAGCCCAAGG	17	14	65	5
ZBTB40	ZBTB40_7	AAGTCGTCTTCACAGCCTGG	30	91	78	22
PHF20	PHF20_3	AAGTCTTCCCAAGAACGAGA	18	23	20	5
OVOL2	OVOL2_5	AAGTCTTCCTGGTGAAGAGG	0	2	0	0
ZNF728	ZNF728_6	AAGTCTTGAGGACCAGATGA	32	25	58	11
SP100	SP100_5	AAGTGAAGAAGAAGAGAGGG	4	3	4	0
LBX2	LBX2_6	AAGTGAGTCTTGGGGAGTTG	8	3	2	1
ZNF669	ZNF669_2	AAGTGATGCAGGAAACCTGC	16	14	56	16
ZNF589	ZNF589_7	AAGTGATGCTGGAAAATCTC	6	13	7	6
ZNF260	ZNF260_7	AAGTGATGTGATTCGAGAGA	25	67	53	16
ZNF146	ZNF146_2	AAGTGATGTTCGCTGAGAGA	7	13	16	2
ZFP37	ZFP37_2	AAGTGCGGAAACGACCAAAG	18	12	17	3
PGR	PGR_7	AAGTGGTCTAAATCATTGCC	15	60	51	28
HIF1A	HIF1A_1	AAGTGTACCCTAACTAGCCG	4	1	21	1
ZNF432	ZNF432_4	AAGTGTTCTCCAGAAAGTCC	22	18	19	10
LBX1	LBX1_4	AAGTTACTCGCTGTGCGGGG	108	45	326	27
NPAS3	NPAS3_3	AAGTTATAGGTGCACAGCGA	70	86	175	25
ZNF788	ZNF788_1	AAGTTCTGAGGCGCATCCAA	92	75	276	8
ZNF805	ZNF805_5	AAGTTCTTGGATGTTGACTG	20	19	51	8
ZNF24	ZNF24_6	AAGTTGGAGGAGGATCCTGA	6	1	9	4
ZNF280B	ZNF280B_4	AAGTTGGGAAGCTGGCAGGA	73	37	145	23
ZNF518A	ZNF518A_2	AATAACTGTTTCTGTTCAGA	4	1	0	0
ZNF573	ZNF573_1	AATACCTGGACCCTAATCAG	7	27	70	8
CCDC169-SOHLH2	CCDC169-SOHLH2_7	AATACCTGGGCCATAACGGC	38	44	163	10
ZNF383	ZNF383_4	AATACTAGAAGCCATGGCTG	15	64	84	25
ZNF12	ZNF12_4	AATAGAGAGAATCCAGGAAG	7	13	38	6
NR1H4	NR1H4_7	AATAGGTCAGAATGCCCAGA	17	58	32	8
ZNF385D	ZNF385D_1	AATATCAACGACGACAACTG	36	181	113	54
ZNF786	ZNF786_6	AATATCCTGGATTGAACACG	0	3	0	0
ZNF766	ZNF766_6	AATATCTCCAGTTCTGGCAG	20	122	53	36
HHEX	HHEX_3	AATATCTCTCTCCGCCCGAG	26	37	184	10
ZKSCAN1	ZKSCAN1_6	AATATCTCTGGGTCTGGAGG	23	31	56	4
ZNF529	ZNF529_4	AATATCTGGATTCTGCTCAG	28	21	85	7
TGIF2LY	TGIF2LY_1	AATATGGAGGCCGCTGCAGA	15	27	13	17
TGIF2LX	TGIF2LX_4	AATATGGAGGCCGCTGCGGA	43	57	116	20
ZNF83	ZNF83_5	AATCACTGGAGAATCCACAC	1	6	23	0
ZNF225	ZNF225_7	AATCATCAGAGAATCCACAG	17	9	13	4
ZNF587B	ZNF587B_2	AATCATCAGAGAGTTCACAG	9	11	9	3
MYBL1	MYBL1_4	AATCATGATCGGCATACTGA	61	151	101	62
NR2C2	NR2C2_1	AATCCAGATAGTCACCGCAG	33	151	106	44
NKX2-8	NKX2-8_4	AATCCAGCCAGGCGGCGCAG	19	40	29	10
NANOGNB	NANOGNB_1	AATCCCTCATGCATACTCTC	72	244	173	55
ZNF610	ZNF610_6	AATCCCTGGACCCTGGACAG	4	0	0	2
ZNF583	ZNF583_7	AATCCTTAAAGCCATGTCCA	0	0	0	2
POU2F1	POU2F1_7	AATCTCAACAGCCCAGGCGC	94	167	275	38
ZBTB6	ZBTB6_1	AATCTCAACCGACACATCCG	17	100	70	26
CREBL2	CREBL2_4	AATCTCAGCAGAACTCAAGC	8	25	22	17
GRHL2	GRHL2_6	AATCTCTCCGTCAGAAGCAG	15	28	59	17
SOX5	SOX5_4	AATCTGAGTGGAGATTCTGA	80	97	268	17
NFE2	NFE2_6	AATCTGGGTGGATTGAGCAG	0	0	0	0
FOXK2	FOXK2_4	AATGAAAAGGAAGCTTCAGG	4	9	7	4
ZNF613	ZNF613_7	AATGAAATGAACTTCCCCGA	10	12	3	3
ZNF285	ZNF285_4	AATGAAGCACTTCTTGCGAA	2	0	0	1
TERB1/CCDC79	TERB1/CCDC79_3	AATGAATCTACTACCCCTGG	21	30	77	5
ZNF10	ZNF10_2	AATGACAACTCTCTTACTCA	38	212	154	62
ZNF324B	ZNF324B_6	AATGACCACACGAGGTCGGG	108	202	121	75
ZFX	ZFX_4	AATGACCATGGACACAGAGT	3	0	10	0
RUNX2	RUNX2_3	AATGAGCGACGTGAGCCCGG	57	100	160	48
ZFP42	ZFP42_5	AATGAGGAGATGCTTTCTCA	44	90	130	29
ZNF596	ZNF596_5	AATGATATCCTCGAAGGTCA	41	40	65	15
ZNF845	ZNF845_4	AATGCAGCAGGACCTTTAGT	109	109	284	24
YY2	YY2_4	AATGCAGGTCAAAACGCTGG	21	36	32	12
ZNF148	ZNF148_7	AATGCAGTCTTCCAGGACAA	1	10	18	2
ZNF397	ZNF397_2	AATGCCAGAGTTGCACACAA	17	5	11	2
ZNF18	ZNF18_7	AATGCCCGTTGACTTGGGGC	54	93	151	30
ZNF461	ZNF461_1	AATGCCTGAACCCAGCGCAG	4	22	35	9
ZNF611	ZNF611_2	AATGCCTGAACCCTTCACAG	20	50	102	7
ZFP30	ZFP30_1	AATGCCTGAACTCATATCAG	3	1	1	1
ZNF415	ZNF415_5	AATGCCTGAACTCTACACAG	0	0	17	1
ZNF680	ZNF680_1	AATGCCTGGACACTGCACAA	5	29	27	10
ZNF695	ZNF695_6	AATGCCTGGACCCAGCTCAG	12	85	57	20
ZNF860	ZNF860_6	AATGCCTGGACCCTACGCAG	0	4	22	0
ZNF479	ZNF479_3	AATGCCTGGATTGTGCTCAG	1	1	1	1
CCDC17	CCDC17_4	AATGCGGCCCTGGATAACAG	8	24	51	31
ZNF575	ZNF575_7	AATGCGGGCAAGGATAGGGG	18	14	3	4
ZBTB3	ZBTB3_3	AATGCGTGAGGGAGATGCTT	45	108	88	36
ZNF556	ZNF556_7	AATGCTATCCTCACCTACTG	15	50	38	11
PRDM5	PRDM5_4	AATGCTGGGCATGTACGTGC	40	85	83	54
ZNF800	ZNF800_7	AATGCTTCCAATTCACCTGA	27	64	56	22
ZNF20	ZNF20_6	AATGGAACTGGAACAAGTGA	2	5	0	1
ZNF544	ZNF544_2	AATGGAAGCACGTTCTATGC	3	15	0	2
KCNIP3	KCNIP3_7	AATGGACCGGAACCAGGATG	83	17	220	6
HDX	HDX_5	AATGGAGACTGGAGATGCTG	7	224	38	63
DRGX	DRGX_4	AATGGAGGAAGACAGAGAGA	0	0	1	0
ZNF791	ZNF791_4	AATGGAGGTGGAACATCTGA	10	57	31	6
HOXA5	HOXA5_3	AATGGCATGGATCTCAGCGT	9	7	38	3
ZNF583	ZNF583_5	AATGGCTGAACCCTGCTCAG	3	7	28	1
ZNF282	ZNF282_4	AATGGGACATGGACGCCCGG	13	12	9	4
HINFP	HINFP_7	AATGGGACTTGATAGAGCAG	26	33	12	8
ZNF451	ZNF451_5	AATGGGCAGTGAGCTCCATG	0	0	0	0
SKIL	SKIL_2	AATGGGCCAGGAAGAACCTG	21	24	46	29
ETV7	ETV7_4	AATGGGCTCGCCAGACTCTG	55	66	146	11
PRDM10	PRDM10_4	AATGGGGAAAAGAGTGACGA	14	104	69	28
ZNF703	ZNF703_5	AATGGGGCTGACGGGAGTGG	56	44	151	11
NR4A2	NR4A2_3	AATGGGGTTGGGCACAGCGA	18	28	61	8
ZEB1	ZEB1_4	AATGGGGTTTTCACTGGTGG	58	82	129	30
HNF4G	HNF4G_7	AATGGGTCTTGAGACAAATG	15	4	47	3
TBX18	TBX18_7	AATGGGTTTGGAAGCCTTGG	20	42	77	7
NFAT5	NFAT5_3	AATGGTAGGGCTGGAAGAGG	2	14	3	6
GLI2	GLI2_4	AATGGTGGCAAGAGATGCTG	13	29	43	4
SKIL	SKIL_7	AATGTAATCAGCCCACAGGA	13	44	44	13
ZNF781	ZNF781_2	AATGTAGAAAGACGTTTAGG	9	20	44	14
ZNF639	ZNF639_7	AATGTAGTGACTGCTTGATG	17	1	61	7
ZBTB8A	ZBTB8A_3	AATGTATTATTCGCTAGTAG	32	2	84	1
ZNF609	ZNF609_3	AATGTCAGGCTCAAAGGAGG	15	41	67	10
ZNF101	ZNF101_6	AATGTCCTTCTTACCGACCG	44	57	107	12
DZIP1	DZIP1_5	AATGTGAACAAACCAGTCGG	12	4	18	0
ZNF462	ZNF462_1	AATGTGAATGAGCTACGATG	2	4	4	0
ZNF550	ZNF550_6	AATGTGACTCACAGCAACCA	5	4	12	2
TBX15	TBX15_4	AATGTGCTGACCTCTGGAAG	22	42	52	10
MTF1	MTF1_2	AATGTGCTGCACATAACCCT	3	13	28	0
THAP2	THAP2_6	AATGTGCTTGTTGTAGGTAG	70	17	144	1
ZNF682	ZNF682_6	AATGTGGAAAAGCCTTTCAC	5	13	1	12
ZNF736	ZNF736_3	AATGTGGCAAAGCATCGAGC	3	0	0	0
ZNF528	ZNF528_5	AATGTGGCAAAGCATTTCGA	8	7	8	4
ZNF493	ZNF493_7	AATGTGGCAAAGCCTTTATC	2	10	13	4
ZNF141	ZNF141_7	AATGTGGCAAAGCCTTTGGA	0	1	9	1
ZNF534	ZNF534_5	AATGTGGCAAGGTCTTCCGT	32	90	62	31
ZNF816	ZNF816_7	AATGTGGCAGGAGTTTCAGT	33	44	171	16
ZNF26	ZNF26_6	AATGTGGGAAAGCCTACAGT	6	6	12	4
ZNF222	ZNF222_5	AATGTGGGAAGAGCTTCAAA	6	19	28	4
ZNF98	ZNF98_6	AATGTGGTAAGGCCTTTAGC	21	28	81	9
SP2	SP2_1	AATGTGGTGAAGCTGACAGG	10	18	8	13
ZNF43	ZNF43_4	AATGTGGTGAAGCTTTTAGC	8	9	15	3
MTERF1	MTERF1_1	AATGTTAGCTTTCACCCGCT	20	32	50	17
VEZF1	VEZF1_3	AATGTTTCTGGTGCACCCTG	4	5	12	3
FAM200B	FAM200B_2	AATTCCACAGAATCTCATGG	7	4	25	1
ZNF578	ZNF578_2	AATTCCTGAACCCTGCGCAG	0	0	0	0
ZFP14	ZFP14_6	AATTCCTGGATCCTGCTCAG	1	0	8	0
DNTTIP1	DNTTIP1_7	AATTCGCCGGGAAGGCCCCA	29	49	82	19
MTERF2	MTERF2_1	AATTCGTAGATTAAAAGGAT	36	139	101	46
ZNF436	ZNF436_5	AATTCTCCTGCATAACATCC	78	33	225	14
ZNF729	ZNF729_2	AATTCTGCTGAACCGTGTCC	6	29	25	8
ZNF99	ZNF99_1	AATTCTGCTGAGCCATGTCC	82	72	235	15
ZNF195	ZNF195_5	AATTCTGCTGAGCGAGGTCC	37	199	89	60
ZNF679	ZNF679_2	AATTCTGCTGAGCGTGATCC	14	92	50	22
ZNF273	ZNF273_7	AATTCTGCTGTGAAGTGTCC	7	70	23	10
ZNF33B	ZNF33B_6	AATTCTTCCTCCAGTCTCCA	15	2	80	6
ZNF33A	ZNF33A_7	AATTCTTCCTCCTGTTTCCA	9	9	23	1
CDC5L	CDC5L_3	AATTGCACGTCAAACTGCCG	14	7	48	0
PAX5	PAX5_1	AATTGGAGGATCCAAACCAA	62	27	185	5
ZNF518B	ZNF518B_6	AATTGGGAGGAGCTGCACCG	9	43	10	11
ZNF286B	ZNF286B_2	AATTGGTTAGAGAAGCAGCA	5	0	1	0
ZNF596	ZNF596_4	AATTTCCCACTCACCGGTGA	20	46	78	24
ZNF14	ZNF14_7	AATTTGACTGGAACGAAGGA	8	28	48	3
POU4F3	POU4F3_7	AATTTGGGTTCTTGCAGCAC	37	59	62	19
GTF2B	GTF2B_2	ACAAAAGATCCATCTCGAGT	15	9	41	4
ZNF277	ZNF277_3	ACAAAATAAGCAGACTGCAG	45	89	132	34
ARID5A	ARID5A_6	ACAAAGCAGTGGAGAAGCTG	5	21	16	5
GTF2B	GTF2B_7	ACAAAGGTTGGAACAGAACC	4	175	3	1
ZNF70	ZNF70_5	ACAACAAGGGCTTTTCCCAG	0	4	0	0
EBF3	EBF3_6	ACAACAATTCCAAACACGGG	10	5	28	2
TFEC	TFEC_6	ACAACAGAGAGCCCGAGAAT	26	7	108	1
CCDC169-SOHLH2	CCDC169-SOHLH2_6	ACAACATGTCCCTCAAACAC	72	71	166	12
MXD4	MXD4_4	ACAACGAGCTAGAAAAGCAC	2	0	5	0
NFIL3	NFIL3_2	ACAACTACTTGACACCATCG	30	84	107	15
HSF5	HSF5_3	ACAACTTCCCCGCCAAGCTG	5	51	33	9
IRF2	IRF2_7	ACAACTTGGCAAATGTCTGG	7	15	37	6
ZNF443	ZNF443_1	ACAAGAACTGGAATCAGGGA	33	48	74	23
ZNF224	ZNF224_3	ACAAGACAGAAATCTTCCCA	0	0	0	1
ZNF684	ZNF684_5	ACAAGAGCCATGGATGGTGG	1	0	0	0
ZZZ3	ZZZ3_3	ACAAGGAGTCAGTAGAACAG	31	57	98	24
TIGD6	TIGD6_3	ACAAGGGGAACAAGAAGCGT	0	0	0	0
ZNF644	ZNF644_6	ACAAGGGTCCTCGAAAGACT	43	70	164	25
NPAS2	NPAS2_2	ACAAGTCTGAGAAGAAGCGT	43	82	45	29
SATB2	SATB2_6	ACAAGTTGTGGACTAAGCTG	0	1	5	1
STAT5B	STAT5B_3	ACAATATATGGCGGATGCAG	0	1	3	0
MXD3	MXD3_4	ACAATGAACTGGAGAAGCGC	3	4	45	1
ZKSCAN7	ZKSCAN7_6	ACAATGACCACTGCAGGCAG	28	10	131	16
DACH1	DACH1_1	ACAATGACTGCACCAACGCA	8	14	14	6
GABPA	GABPA_6	ACAATGGCCAAATCCAACTA	2	0	0	0
ZSCAN29	ZSCAN29_3	ACAATGTCCAGAAAATGGAG	39	2	76	1
NFE2L1	NFE2L1_1	ACAATTACTTCACTGCCCGG	35	94	152	32
ZNF827	ZNF827_5	ACACAAAGAAGACACTCCCG	36	18	82	2
ZNF763	ZNF763_2	ACACAAGAAAGGAATCACAC	0	0	0	0
HSFY2	HSFY2_1	ACACAATGGAGACCTAGTGG	102	171	376	44
NKX2-6	NKX2-6_1	ACACACACCACTGGCCAGCG	52	32	145	14
ZFPM2	ZFPM2_5	ACACACAGTCAGAGAAACCG	3	14	18	2
ZSCAN31	ZSCAN31_3	ACACAGAAGAATCCACACAG	11	3	28	0
ZNF581	ZNF581_6	ACACAGCATCACCCACTCGG	16	34	53	15
ZNF160	ZNF160_6	ACACAGCTCTTCACAGTCCA	27	201	90	45
ZNF177	ZNF177_3	ACACAGTCTGATCTCCAAGG	13	45	53	5
ZNF148	ZNF148_4	ACACATGAAAGACTTCCTCA	41	42	66	13
ZNF709	ZNF709_1	ACACATGAGAATGCACACAG	1	18	0	2
LIN54	LIN54_6	ACACCAGCTTTAAATAGTGG	6	8	28	4
GLIS2	GLIS2_1	ACACCATCCAAATAGCGCAG	2	6	5	5
DLX1	DLX1_6	ACACCGCCTTGCCCGACACG	2	0	9	1
NCOA1	NCOA1_2	ACACCTACCTCCAAAAGAAG	16	38	96	6
ZNF329	ZNF329_2	ACACCTGGGAGAGCAACCCA	18	30	55	6
HOXD9	HOXD9_2	ACACGAGGCGAACTCGGCGG	23	91	162	19
ZNF665	ZNF665_4	ACACGGATTTGCCACCAAAG	42	8	209	3
ZNF668	ZNF668_1	ACACGGGCTGCATGAAGCGG	50	110	107	26
ETV7	ETV7_1	ACACGTAATCCCACAGCAGG	31	40	92	35
CEBPG	CEBPG_3	ACACTAATTCCGTTCACCCC	13	90	38	32
FOXN1	FOXN1_1	ACACTATCAGTACCAGCGAA	28	14	51	5
ZSCAN5B	ZSCAN5B_7	ACACTCTCATGGGGTCAGGG	63	70	130	24
ZNF560	ZNF560_4	ACACTGCCAAGAGTTCTCCA	48	22	82	8
YBX3	YBX3_1	ACACTGCGCAGATATTTCCG	26	37	34	13
ZNF17	ZNF17_7	ACACTGTCATTCACAAACGA	51	60	213	15
ZNF277	ZNF277_2	ACACTTACCAAATGGAGCAG	3	31	9	12
ZNF654	ZNF654_6	ACACTTACTGCTTCTAGTGA	2	13	1	3
LHX2	LHX2_2	ACACTTCAACCATGCCGACG	17	0	13	5
ZNF660	ZNF660_7	ACACTTGAGAACCCACACTA	17	26	76	8
BATF	BATF_3	ACAGAACGCGGCTCTACGCA	71	48	141	18
ZNF385D	ZNF385D_6	ACAGAAGACAGCACATCCAC	21	54	75	9
ESX1	ESX1_2	ACAGAAGCGGAAAACAACGT	12	40	56	12
TEAD2	TEAD2_5	ACAGAATCAACTGCATCTGG	15	87	39	24
ZNF75D	ZNF75D_4	ACAGAATGTCAAACAGGCTC	8	0	16	0
STAT5A	STAT5A_2	ACAGAATGTGCCGGATGCAG	3	4	10	1
ZBTB21	ZBTB21_7	ACAGACAAAACAGGTGGCCG	38	13	79	6
KAT7	KAT7_3	ACAGACAGTTCAGAAAGTGA	9	8	7	4
ZNF792	ZNF792_1	ACAGACTCCGATGGCAGCGG	13	26	5	7
POU4F3	POU4F3_3	ACAGACTCGGCGCATGGCCT	27	80	94	17
TMF1	TMF1_3	ACAGACTGTGTTAGACAAGG	48	19	130	16
NFYC	NFYC_1	ACAGAGAAATGATATCGCCA	5	6	11	2
HOXA7	HOXA7_3	ACAGAGAAGCGGCTACGGGG	13	73	11	22
ZNF711	ZNF711_3	ACAGAGAGTGAGTACACCAG	21	18	48	3
LHX3	LHX3_7	ACAGAGATCCCGCTGTGCGC	22	32	110	6
MXD1	MXD1_1	ACAGAGATGCCTTAAAACGG	1	0	0	0
LHX4	LHX4_7	ACAGAGATTCCCCAGTGCGC	22	34	27	2
FLI1	FLI1_7	ACAGAGCAACGGCCCCAGCC	1	0	0	1
USF3/KIAA2018	USF3/KIAA2018_4	ACAGAGCAAGAATATGATCC	40	16	71	3
PBX4	PBX4_2	ACAGAGCAGGCTTCATCCGA	37	159	100	50
T	T_1	ACAGAGCGCGAACTGCGCGT	4	4	14	1
ZNF114	ZNF114_7	ACAGAGGAACCACACAGGCA	24	45	101	16
TBX6	TBX6_5	ACAGAGGCCTATGGGAGCGG	0	1	0	0
E2F7	E2F7_7	ACAGAGGCGCTTCTGAGCTG	5	3	54	3
ETV6	ETV6_6	ACAGAGGGTAGGACTCCTGG	9	8	17	5
PLSCR1	PLSCR1_4	ACAGAGGGTTTACTTTGCAG	74	110	157	64
NR2C1	NR2C1_3	ACAGATAATTCTCCAGACCA	11	0	13	0
BCL11A	BCL11A_2	ACAGATGATGAACCAGACCA	1	1	0	2
ESR2	ESR2_2	ACAGATGTGATAACTGGCGA	35	22	101	9
TIGD7	TIGD7_6	ACAGATTTCAAAGCTAGCAC	24	41	80	14
ZNF280A	ZNF280A_4	ACAGATTTTACAGACAGCAG	4	8	10	2
ST18	ST18_5	ACAGCAACCGCAACACCCAC	38	75	75	11
ZNF571	ZNF571_5	ACAGCAACTCACGTGGGGCA	9	19	34	4
ZBTB4	ZBTB4_1	ACAGCAATGTACACTCGTGG	7	56	29	29
STAT3	STAT3_2	ACAGCACCGGCCGATGCTGG	93	169	229	47
NCOA1	NCOA1_3	ACAGCACGGAAAAGAGGCGC	0	1	3	2
ZNF385B	ZNF385B_2	ACAGCAGAACTACTGTCCAC	33	56	100	13
NKX3-2	NKX3-2_2	ACAGCAGACAGCGGGAGCCG	40	91	120	17
RORC	RORC_3	ACAGCAGCAACAGGAACCAG	2	12	2	4
ZNF189	ZNF189_6	ACAGCAGGAAGTCTACCCTA	2	5	0	1
RAX	RAX_5	ACAGCATCGAGGCCATCCTG	3	1	18	0
CREB5	CREB5_6	ACAGCCACCCCAGCCCACAG	16	26	21	1
ZNF142	ZNF142_4	ACAGCCAGCCAGTAGCACCG	38	29	138	14
TRERF1	TRERF1_4	ACAGCCCACCAGTGAAACCA	81	115	216	37
DPF3	DPF3_4	ACAGCCCAGAAAGGACCGGA	1	12	16	3
ZNF629	ZNF629_7	ACAGCCCCTTAAGCCGCCGG	6	1	9	0
ERF	ERF_6	ACAGCCGGGCCACCTCATCA	27	10	45	4
FOXJ1	FOXJ1_2	ACAGCCTGACCAGCCTGCAG	18	22	29	12
FEZF2	FEZF2_3	ACAGCCTGGTTGATGACCTG	24	60	92	11
FOXP3	FOXP3_7	ACAGCCTGTTTGCTGTCCGG	42	98	94	49
MLXIPL	MLXIPL_1	ACAGCGACTCGCTGCCCCGG	42	26	87	4
ZNF837	ZNF837_4	ACAGCGAGCGGAGTCCCCGA	2	1	6	0
THAP9	THAP9_6	ACAGCGCTCAAAATGGATCA	10	26	68	6
THRB	THRB_3	ACAGCGGTAGTGATACCCGG	16	16	46	15
KLF16	KLF16_4	ACAGCGGTGGCTCTTGGCGG	4	13	1	14
GSX1	GSX1_3	ACAGCGTAGGGGAAGAGCGG	22	27	84	5
ZNF587	ZNF587_7	ACAGCGTGACTATACATCAG	75	2	154	3
TFAP4	TFAP4_1	ACAGCTCAAGCGCTTCATCC	10	18	11	2
DMBX1	DMBX1_2	ACAGCTCCAGAAGCAGAAGG	0	0	0	0
SIX2	SIX2_7	ACAGCTGCTGCAGCTTGGCG	24	82	41	25
C11orf95	C11orf95_7	ACAGCTGGGATGCACACCTG	3	3	15	0
STAT3	STAT3_4	ACAGCTTCCCAATGGAGCTG	3	3	14	0
SCML4	SCML4_2	ACAGCTTGGCGAGGAAGCGG	11	9	23	2
OSR1	OSR1_2	ACAGCTTGGTCACGTCGAGG	34	52	76	10
SETDB1	SETDB1_2	ACAGCTTGTCAGCAGGAGGG	1	18	2	6
SRY	SRY_3	ACAGCTTTCAGTGCAAAGGA	31	190	96	73
ZNF248	ZNF248_4	ACAGGAACAAGTGTCATTCA	30	27	46	0
TBPL1	TBPL1_7	ACAGGAAGTATCACAGTAAC	24	66	77	14
ZNF432	ZNF432_5	ACAGGAATTGCTGACACTGG	38	7	41	1
ZNF235	ZNF235_6	ACAGGACAGAAAACCTACCA	10	10	34	1
ZNF155	ZNF155_3	ACAGGACAGAAACCTTCCCA	37	21	87	2
PRDM12	PRDM12_4	ACAGGAGCAGAACCTGGAGG	2	7	20	3
FOXM1	FOXM1_3	ACAGGAGTCTAATCAAGCAG	27	92	49	23
ARNT2	ARNT2_3	ACAGGGAACAAGTCCACCGA	1	2	3	0
ZIM3	ZIM3_3	ACAGGGAAGAGTGACCTTCG	34	100	115	30
FOXB1	FOXB1_5	ACAGGGAGAACACGCAGCGC	16	106	42	28
HOXC12	HOXC12_5	ACAGGGAGCACACGTTGTCG	18	51	145	13
ZNF474	ZNF474_5	ACAGGGCAGCAGCTGAGCCT	12	0	31	2
SNAI3	SNAI3_1	ACAGGGTCCCCAACTACCGG	30	56	110	15
ZNF770	ZNF770_4	ACAGGTCAGAAGATTGCTGG	8	11	17	5
ZSCAN4	ZSCAN4_2	ACAGGTCCACGTCCACATGC	31	38	83	14
BCL11B	BCL11B_5	ACAGGTGAGCAGGTCAGGGT	38	16	123	0
ZNF444	ZNF444_3	ACAGGTGGAAAGGAGGACAG	0	41	1	24
TEAD3	TEAD3_7	ACAGGTGGTAGAGAAGGTGG	12	8	24	4
ZNF354B	ZNF354B_3	ACAGGTGTCACTGACATTCG	12	15	26	6
ZNF211	ZNF211_1	ACAGGTTCCCATAGCTACAG	20	45	46	8
ZBTB11	ZBTB11_3	ACAGGTTGACACCAAAGGAG	16	22	36	10
FOXO1	FOXO1_1	ACAGGTTGCCCCACGCGTTG	60	111	230	16
TGIF2	TGIF2_2	ACAGGTTGGTCTGTCCAGAA	75	58	212	19
SATB1	SATB1_6	ACAGGTTTCGACCAACACAG	7	7	42	6
ZNF491	ZNF491_4	ACAGTAACTGGAACGAATGA	3	0	7	0
ZNF654	ZNF654_4	ACAGTAATGAAGTGGAGCAA	2	53	11	19
ATF2	ATF2_4	ACAGTACTTGAGGTTGGTGA	103	69	277	19
ZNF566	ZNF566_3	ACAGTATCTCACCTGAGCCA	2	10	10	3
KLF11	KLF11_1	ACAGTCCCCACAGACAACTG	16	27	70	15
HOXC4	HOXC4_1	ACAGTCCGGAATATTACGGC	17	18	20	4
HOXC9	HOXC9_2	ACAGTCCGGCACCAAACCGC	77	136	137	46
CENPA	CENPA_4	ACAGTCGGCGGAGACAAGGT	0	4	14	0
VDR	VDR_4	ACAGTGATCTGAGCAGGAGG	0	0	0	0
GLI2	GLI2_2	ACAGTGGCGTGGAGATGCCG	17	11	37	0
PBX2	PBX2_4	ACAGTGGGATCCACCTGCAG	7	19	1	7
SREBF1	SREBF1_4	ACAGTGGTGCCAGAGACCAG	4	1	0	2
ZNF516	ZNF516_1	ACAGTGGTGTTTGAGTCCGA	4	0	0	0
NKX1-1	NKX1-1_1	ACAGTGTCGCTGGCCGCGAG	34	134	63	45
BHLHE23	BHLHE23_1	ACAGTGTTTGCAAAGCGCGG	33	57	201	25
JUND	JUND_3	ACAGTTCCTCTACCCCAAGG	18	9	25	3
SIX1	SIX1_7	ACAGTTGCTGCAGTTTGGGG	9	3	28	1
RORB	RORB_4	ACAGTTTCTCTGCCTTGGGC	31	73	87	31
HSFX1	HSFX1_2	ACAGTTTCTGTGGAAAGGGG	9	23	46	11
CBX2	CBX2_4	ACATAACAGCTGGGAGCCGG	30	16	101	9
ZNF397	ZNF397_1	ACATAATCCAGAAAGCGGCG	25	76	36	9
ZNF721	ZNF721_7	ACATAGGAGAGTTCACACTA	7	18	3	16
GTF2B	GTF2B_4	ACATATAGCCCGTAAAGCTG	0	0	0	0
CREBL2	CREBL2_3	ACATATAGCTCTTTCTCGAC	2	2	4	0
ZNF404	ZNF404_4	ACATCAACTCACCCGGGCCA	35	104	111	22
ZNF232	ZNF232_5	ACATCACCCTAAGAGTGGAG	19	19	63	0
TBPL1	TBPL1_5	ACATCACTGTCTGCATCCAT	94	41	206	12
ZFP41	ZFP41_4	ACATCAGAAGACGCACACCG	174	137	253	46
ZKSCAN8	ZKSCAN8_2	ACATCAGCTAGAGAACGGAG	1	51	1	23
ZNF883	ZNF883_6	ACATCAGGGAATTCATTCTG	14	11	27	13
ZFP3	ZFP3_1	ACATCAGGGAGATACAACAG	13	42	10	9
LIN28B	LIN28B_5	ACATCGACTGGAATATCCAA	3	40	51	12
NFATC1	NFATC1_5	ACATCGGGAGGAAGAACACA	14	19	63	5
ZNF354A	ZNF354A_6	ACATCTAAGAACCCATACTG	1	2	1	0
ZNF578	ZNF578_6	ACATCTACGATGGCATGTCA	12	38	53	14
ZNF2	ZNF2_1	ACATCTGATGTCACACACTG	66	104	100	32
TEAD1	TEAD1_1	ACATGGTGGATAGATAGCCA	2	1	6	0
ZNF696	ZNF696_5	ACATGTCCCCTCACCTGCAA	1	0	0	0
ELF1	ELF1_1	ACATGTTCCACAATTACGGC	21	55	24	24
THAP2	THAP2_4	ACATTAACATCAGCTTCCAC	4	0	26	0
ZFP14	ZFP14_7	ACATTAACTTACATGGGCCA	12	0	20	0
ZNF165	ZNF165_5	ACATTACCCAGAGAGTGGAG	2	3	1	0
ZNF559	ZNF559_7	ACATTCTCTGAGGTGTGAGG	67	30	136	5
ZNF28	ZNF28_5	ACATTCTTCTCAACAGGGCA	2	12	1	5
ZNF853	ZNF853_1	ACATTGAAGTTCCAGCACGA	24	66	89	28
NFATC2	NFATC2_1	ACATTGGAAGAAAGAACACG	58	3	158	1
ZNF182	ZNF182_3	ACCAAACCTCATCCTCAAGT	29	44	66	11
MBD4	MBD4_1	ACCAAACTGAGCAGAAGCGA	96	83	244	19
ZNF112	ZNF112_1	ACCAAAGGGTTCATGTGGAA	35	36	117	8
NKX1-1	NKX1-1_2	ACCAACGGCTACAGCAGCGG	44	28	111	19
ZNF454	ZNF454_7	ACCAAGACAGAAGCCTCCAG	19	81	47	30
ZSCAN4	ZSCAN4_6	ACCACAAGAGAAGCAAACAT	25	79	45	17
HINFP	HINFP_3	ACCACACCAAGCTGAAACAG	9	19	13	6
ZNF658	ZNF658_1	ACCACATGAGAACTGACACA	3	7	17	5
EBF2	EBF2_7	ACCACGCCTGGGATGTGCCG	15	3	56	13
ZNF587B	ZNF587B_3	ACCACGTGGTTCGATGGCGG	3	27	14	15
ZNF782	ZNF782_1	ACCAGAACTGATCTTCACAT	1	4	10	5
ZNF543	ZNF543_4	ACCAGAGCTGATCTACCAGT	0	7	0	2
ZNF33B	ZNF33B_5	ACCAGAGGTGATCTTCAGGC	4	2	27	5
E2F6	E2F6_3	ACCAGCGATACATCAAAACG	54	144	266	50
ZBED5	ZBED5_1	ACCAGCTTCATTAGTAGCAC	5	0	7	0
ZNF418	ZNF418_4	ACCATCATAGCAGGGCACTG	15	4	5	3
RORA	RORA_1	ACCATCTCGAGACATCCCTA	31	8	105	4
TCF7L1	TCF7L1_7	ACCATGCCCCAGCTCGGCGG	37	57	174	15
ZFP90	ZFP90_2	ACCATGTCGACCCTGCTCAG	10	25	28	14
HOXA2	HOXA2_6	ACCATTCCCAGCCTGAACCC	24	75	74	26
ZNF626	ZNF626_1	ACCATTGCAATTTAGAGATG	2	0	4	3
ZNF98	ZNF98_4	ACCATTTCTAGGCTTCCAAG	6	27	30	8
ZNF486	ZNF486_2	ACCATTTCTAGGCTTCTAAG	5	3	5	2
ZNF697	ZNF697_6	ACCCACAGGACTCAAGGCAC	6	18	44	4
ZNF316	ZNF316_7	ACCCAGGAGCGACTTAGCCG	4	0	0	0
ZNF43	ZNF43_7	ACCCATAAGATAATTCGCAC	27	18	231	4
LHX5	LHX5_7	ACCCCGTACACCTACTACGG	14	14	39	3
LYL1	LYL1_1	ACCCCTTACAGTGTCTACAT	46	146	102	52
ZNF408	ZNF408_3	ACCCGGAATGGAGGAGGCGG	1	3	20	0
SETBP1	SETBP1_1	ACCCGTTGCTCTATCTTCGT	89	97	222	26
NFE2	NFE2_3	ACCCTGTTCCTGCTCTGCTG	16	18	94	3
SOX1	SOX1_1	ACCGACCTGCACTCGCCCGG	91	286	200	99
TCF3	TCF3_2	ACCGAGGATGGAAGACCCGG	7	9	13	0
ZBTB45	ZBTB45_3	ACCGATGGCGAGGATGGCGA	10	33	7	15
CENPX/STRA13	CENPX/STRA13_6	ACCGCAGAAGCAGCAGTCCG	36	68	32	26
HES7	HES7_5	ACCGCAGCCTGGAAGAGCTG	42	37	107	14
INSM1	INSM1_1	ACCGCCGCTGGCACAAACCG	30	31	87	19
ZNF250	ZNF250_7	ACCGCCTGTGCCCTGCTCAG	1	0	0	0
ZNF568	ZNF568_7	ACCGGATGTGATATTCAAGT	18	23	72	8
LHX1	LHX1_6	ACCGGCGCTCCAAGGAGCGG	3	1	10	3
NR2F6	NR2F6_2	ACCGGGCGTGAAGAGCGCGA	16	16	38	9
ZBTB7A	ZBTB7A_1	ACCGTCAGCACAGCCAACGT	1	23	0	8
ZNF264	ZNF264_5	ACCGTCCACTCACCTGGGCC	154	239	341	72
NR1H4	NR1H4_5	ACCGTGAATGAAGACAGTGA	5	26	6	19
ZSCAN5B	ZSCAN5B_6	ACCGTGGAGTGTCTGACCCA	15	56	8	18
ZHX2	ZHX2_7	ACCGTGTCGGGAGGCCGCGA	36	45	111	21
SPIC	SPIC_1	ACCGTTCTCCAATTATAGAC	4	12	1	5
ATF7	ATF7_2	ACCGTTTGTGTGCAATGCCC	28	92	92	32
ZFP92	ZFP92_7	ACCTATGTGCAATCCTGCGG	18	139	123	53
OSR2	OSR2_4	ACCTATTCCACCCCAAGCAG	4	0	9	2
SNAI2	SNAI2_5	ACCTCCTCCAAGGACCACAG	32	94	104	26
MNX1	MNX1_7	ACCTCCTGGGGAAGTGCCGC	16	20	58	1
ZNF597	ZNF597_6	ACCTCGACTCACCTGGGCCT	13	13	53	8
SNAPC2	SNAPC2_6	ACCTCGCCCAGATAGCGCGC	7	13	23	1
NFIC	NFIC_1	ACCTCGCTCACGCACGAAGT	0	3	6	0
BBX	BBX_1	ACCTCGGCAAACTGAAACAA	16	14	18	5
FOXB2	FOXB2_7	ACCTCGGCCGAAAGCAAGGG	19	33	60	24
MKX	MKX_5	ACCTCGGCCTGAGACACCGG	30	12	79	6
ZNF696	ZNF696_6	ACCTGCAAGGGACTCCATCA	2	0	0	0
NOBOX	NOBOX_1	ACCTGGAAAGGTATCCAGAG	12	0	1	4
ZNF112	ZNF112_2	ACCTGGCAACAAAGTGCAGG	32	84	103	19
BCL6B	BCL6B_4	ACCTGGCCTGGATGAAGCGG	43	23	87	5
SETBP1	SETBP1_5	ACCTGGGAAGGGGATCCCGG	4	47	24	7
THAP7	THAP7_7	ACCTGTGGAAGGAGATGCCG	0	0	0	0
ZNF793	ZNF793_7	ACCTGTGTCATTCAAAGATG	8	0	1	0
ZBTB33	ZBTB33_3	ACCTTCTCACAGTAACGGCA	46	47	142	8
E2F5	E2F5_3	ACCTTCTGGTACACAACTGG	11	51	56	20
ZNF549	ZNF549_4	ACCTTTGAGCTTCATCAAGG	27	21	102	5
ZNF317	ZNF317_1	ACGAACAGGTCCAAATTCTG	98	154	307	51
LTF	LTF_1	ACGAACTCACTATTATGCCG	52	79	107	18
ZNF367	ZNF367_7	ACGAAGCCCCGAGTGCTCGG	123	57	221	24
OVOL2	OVOL2_2	ACGACACCTTCGACCTGAAG	24	2	30	0
ZNF226	ZNF226_5	ACGACAGCAACCCGAAGACA	13	85	16	39
HES6	HES6_5	ACGAGAGCCTGCAGGAGCTG	9	10	12	11
TGIF1	TGIF1_1	ACGAGCCAAAACTGATCCCG	4	6	25	2
GRHL3	GRHL3_4	ACGAGCGGAAGCAGTTCCGG	22	5	103	8
TWIST1	TWIST1_3	ACGAGGAGCTGCAGACGCAG	3	0	4	0
ZNF691	ZNF691_1	ACGCACCAGCAAGATCACCT	9	5	6	2
ZNF575	ZNF575_1	ACGCACCGCTTAGCACACGG	17	10	61	0
NACC2	NACC2_4	ACGCAGGAGCGGCTCTCCAG	30	57	148	10
EGR1	EGR1_1	ACGCCCTTACGCTTGCCCAG	0	12	24	2
NKX6-2	NKX6-2_6	ACGCCGGGCCAGAAGATGGG	3	7	8	1
TCF24	TCF24_1	ACGCGAGTCGCGGATGGCGG	41	23	161	12
THAP7	THAP7_2	ACGCGCGAGACGCGCAACCG	14	17	36	5
ZNF17	ZNF17_5	ACGCGGCACCCACCTCAGTC	59	77	192	21
ZNF180	ZNF180_3	ACGCGGGAAGCTGGAAGCGG	11	11	35	5
LCORL	LCORL_7	ACGCGGGACGCAGATGGACA	14	84	14	35
FOXE3	FOXE3_7	ACGCTGAACAGACGCGCGGG	116	112	218	30
MSX1	MSX1_7	ACGCTGAAGGGCAGGAGCGA	14	4	23	1
TFCP2L1	TFCP2L1_4	ACGCTGACCTACCTCAACCA	22	29	105	12
ZNF749	ZNF749_7	ACGCTGCACGCACCTCGGTC	51	120	133	56
NKX3-1	NKX3-1_3	ACGCTGGCAGAGACCGAGCC	72	95	235	42
HOXA10	HOXA10_7	ACGCTGGCTTGCGGCAGCGG	7	0	0	1
OSR1	OSR1_6	ACGCTGTGCACCTGCATCAG	21	36	75	8
UBP1	UBP1_1	ACGCTTACTTATTTGAACCA	32	15	65	6
ZNF610	ZNF610_1	ACGCTTGACATTCATGGACG	42	23	142	7
ZFP91	ZFP91_3	ACGGACAAGCCCCGATGCCG	12	8	22	2
ZNF644	ZNF644_3	ACGGACTGGAGCTGGCATGG	14	44	45	13
DPF1	DPF1_3	ACGGAGACTCAACATCCTGG	0	0	0	0
HOXC11	HOXC11_3	ACGGAGAGCAGAAGTTGCCC	39	101	97	33
NEUROD2	NEUROD2_1	ACGGCGAAGACGACGAGCCG	26	29	100	22
MXD3	MXD3_5	ACGGCGCAGCAGGCTCAGCG	107	35	201	14
XPA	XPA_3	ACGGCGGCTGCGGCTACTGG	5	5	0	1
NFATC4	NFATC4_6	ACGGCGGGACAGAGCTGGGG	2	5	0	0
ATOH1	ATOH1_7	ACGGCTAGCAGCCAACGCCA	10	55	20	7
ZNF296	ZNF296_6	ACGGGAAGGTCTGCAGGCAG	6	28	6	26
ZNF548	ZNF548_4	ACGGGACACCCACCTCAGTC	178	111	448	32
ZNF791	ZNF791_3	ACGGGAGAGAGACTCTGTGA	38	3	95	1
MAX	MAX_6	ACGGGCTCATCATAATGCAC	12	14	29	1
MLX	MLX_3	ACGGGGCTTGCCTTGACCCA	26	26	68	7
POU4F1	POU4F1_4	ACGGGTACTTGTGCTCAGGG	42	76	77	19
BHLHA15	BHLHA15_3	ACGGGTCCCTGCCGAACCCG	58	58	196	11
ZBTB44	ZBTB44_1	ACGGGTGAATCGCACCCCGC	21	3	38	6
THAP9	THAP9_5	ACGGGTGCTGCAGCCCACTG	1	2	0	0
ZBED9	ZBED9_2	ACGGTATTACTTACACAGTG	26	45	24	20
ATMIN	ATMIN_6	ACGGTCTCTCAGGGCCTCTG	25	24	28	13
HMGN3	HMGN3_5	ACGGTCTGCCAGATTGTCAG	30	50	93	10
ATF7	ATF7_3	ACGTACCTGTCCACAGCCCG	5	1	0	0
DBP	DBP_1	ACGTACTCCACATCGCCGAA	21	7	141	4
ZNF846	ZNF846_5	ACGTAGTCTCATGTCTGGAT	14	62	23	16
TBX22	TBX22_1	ACGTCTATCACAGCTCACAG	8	143	42	59
PRDM12	PRDM12_3	ACGTCTTGGAGAAGATGCCG	35	31	133	7
ZNF814	ZNF814_1	ACGTGGTTCGATGGCTGCCG	29	93	100	37
MBD1	MBD1_1	ACGTTGTGCAAAGACTGTCG	69	41	200	19
CHCHD3	CHCHD3_7	ACTAAAGCAAGCCAAAGAGC	4	1	7	3
BHLHE23	BHLHE23_3	ACTAAGCCACGGCTACGCGG	39	16	87	10
NFYB	NFYB_4	ACTAAGTGAAGAGCTTACAG	6	0	2	1
HOXC9	HOXC9_1	ACTACATGTACGGCTCGCCC	33	104	143	22
ALX4	ALX4_1	ACTACCCAGACGTGTATGCG	27	197	37	39
ZNF287	ZNF287_2	ACTACGATGATAGACTAGAG	1	0	0	1
SP1	SP1_7	ACTACTACCACCAGCAACAT	38	147	69	27
MTERF3	MTERF3_1	ACTACTTGAGCTAGTAGACT	3	39	5	12
ASH1L	ASH1L_7	ACTAGAGACACACATACTGG	1	12	8	2
ZNF107	ZNF107_3	ACTCAAACCTAATTAACCAT	13	53	34	32
THAP12/PRKRIR	THAP12/PRKRIR_6	ACTCAAATTCAATACGTCGG	4	0	22	2
WIZ	WIZ_7	ACTCACCACAGAACTCGCAG	14	4	15	2
ZNF77	ZNF77_7	ACTCACCTCAGATGCCTCTG	23	63	37	19
NFE2	NFE2_1	ACTCACCTGCAGCTCGGTGA	7	3	0	4
SNAI2	SNAI2_1	ACTCACTCGCCCCAAAGATG	30	64	50	14
ZNF772	ZNF772_2	ACTCAGAAGGCTTACCCCTG	0	0	0	0
ZNF594	ZNF594_7	ACTCCAAAGACAAATCACCC	1	0	1	0
ZNF420	ZNF420_3	ACTCCAATTTACCCGAGCCA	50	118	95	28
ZNF747	ZNF747_1	ACTCCACACGCAGCTCCCAG	26	38	51	14
FOXD4L5	FOXD4L5_5	ACTCCAGCCGGGGCTGCAGG	56	83	147	21
ZFP69	ZFP69_1	ACTCCCGACAGCAGAATCCC	15	6	13	13
TSHZ1	TSHZ1_4	ACTCCGAGAAGACCAAGAGG	0	0	0	0
ZNF396	ZNF396_5	ACTCCTAACACAAACTTCAG	44	20	89	0
TSC22D1	TSC22D1_1	ACTCCTAGATCCATCGCCAC	37	51	95	6
ZNF770	ZNF770_2	ACTCCTAGCACGCTTAAGCT	21	17	42	1
GTF2I	GTF2I_1	ACTCCTCATCTTCAACGGGG	4	4	10	0
ATF5	ATF5_5	ACTCCTGGCGACCCTGGGGC	38	14	46	4
TIGD2	TIGD2_1	ACTCGATTTAAGCAGCGCCA	11	21	118	15
ZBTB20	ZBTB20_5	ACTCGGGCCAGGACACGCCG	0	10	0	1
ZNF69	ZNF69_6	ACTCTACAAGGAAGTGATGC	7	2	10	0
ZNF214	ZNF214_5	ACTCTACAGGGAGGTCATGT	7	19	37	6
POU3F4	POU3F4_7	ACTCTGCGGGCATGCAGCAG	0	0	0	0
ZNF562	ZNF562_6	ACTCTGTGAGAATTGTGGAG	4	11	0	0
DR1	DR1_1	ACTCTTCTTCAGGAATGCCA	86	59	249	20
ZSCAN22	ZSCAN22_4	ACTGACAGCACAGCGCTCGG	7	1	20	4
ZNF165	ZNF165_3	ACTGACAGCAGAGCTCCCGG	15	38	10	5
IKZF4	IKZF4_5	ACTGACCTGAGTGTGTGCGG	5	86	20	10
SMAD3	SMAD3_2	ACTGACCTGCGTCCATGCTG	25	57	25	20
LBX1	LBX1_1	ACTGACGCCGTTCAGCATCG	43	52	114	39
ZFP2	ZFP2_3	ACTGAGATGAGAGTATGTGG	2	3	0	0
PHF1	PHF1_2	ACTGATGGGCTGCTATACTT	4	7	3	3
ZNF554	ZNF554_6	ACTGATGTGGGGATTAAAGA	1	0	0	0
MEF2D	MEF2D_6	ACTGCACTCACCAACAGGGC	26	108	47	21
PITX1	PITX1_1	ACTGCAGAGAAGGAGCGCGG	14	35	58	11
SP3	SP3_1	ACTGCAGGCATTAATGCCGA	3	6	0	1
USF3/KIAA2018	USF3/KIAA2018_7	ACTGCCACTAAAGTGCACCA	45	55	94	21
ZSCAN1	ZSCAN1_2	ACTGCCGGAAGCGCAGACGC	26	0	38	3
ZNF383	ZNF383_3	ACTGCCTGGACCCTGTTCAG	7	5	46	1
AKAP8L	AKAP8L_2	ACTGCGGGCCACCATGAGGG	42	35	136	9
ESX1	ESX1_4	ACTGCGTGAACGCGGTGCGG	32	80	111	32
ZNF417	ZNF417_6	ACTGCGTGACTATACATCAG	14	5	45	9
DLX4	DLX4_2	ACTGCGTGTGCTGGAAACGC	54	18	88	8
ZNF143	ZNF143_2	ACTGCTAAATCTCAACAGAG	12	49	19	6
ELK4	ELK4_5	ACTGCTCGTGATCACAAGGG	11	17	21	1
ZNF696	ZNF696_3	ACTGCTCTCTTTAGCACCTG	28	22	46	0
ZXDC	ZXDC_6	ACTGCTGGCTCCAATCAAGG	8	5	62	1
ARNT	ARNT_4	ACTGGCAACACATCCACTGA	10	76	41	29
MBD1	MBD1_6	ACTGGCGCCTGAGACCAGGG	2	0	14	1
SP2	SP2_2	ACTGGGACTCACAGCAGCAG	17	65	86	18
MYF6	MYF6_7	ACTGGGAGCTGCAGGTGCGC	49	7	111	4
TFE3	TFE3_2	ACTGGGGAAGGGAGCCGCGG	4	0	7	2
CRX	CRX_6	ACTGGGGCCACTTAGGGCCA	61	41	125	9
EPAS1	EPAS1_5	ACTGGGGCTGCAGGTTGCGA	1	18	0	10
MYBL2	MYBL2_7	ACTGGGGTGGATGTCAGCGA	15	3	3	1
T	T_5	ACTGGGTCTCAGGGAAGCAG	36	54	144	14
ARGFX	ARGFX_2	ACTGGTAGAACTCTCAGTGA	0	0	0	0
ZNF529	ZNF529_6	ACTGGTGACACTCAGGGATG	2	0	17	0
ZNF565	ZNF565_7	ACTGGTGACATTCAGGGACG	0	0	5	0
ZNF225	ZNF225_1	ACTGTACCGAGAAGTGATGC	16	4	16	5
ZBTB38	ZBTB38_4	ACTGTAGCTGATCACAGAGG	0	3	1	0
ZNF865	ZNF865_5	ACTGTATGGGGAACACGCCA	8	26	23	12
ATF3	ATF3_5	ACTGTCAGCGACAGACCCCT	37	179	81	40
ELF1	ELF1_6	ACTGTCCTCAAAACTTCTGA	21	50	70	8
SNAI1	SNAI1_6	ACTGTCCTCATCTGACAGGG	23	54	55	20
ZFP57	ZFP57_4	ACTGTCTAGATGCCAGCCAG	12	6	41	4
ZNF540	ZNF540_3	ACTGTGACTTACATGGGCCA	2	37	19	6
ZNF711	ZNF711_5	ACTGTGATTCAAGCAGCTGG	21	4	20	2
ZNF488	ZNF488_7	ACTGTGGCTGGAGCATACCC	4	33	10	4
ZNF345	ZNF345_4	ACTGTGGGAAGGCTTATGGG	26	7	39	4
ZNF510	ZNF510_5	ACTGTGGGCCAACTTGCAGA	4	15	17	8
HOXA3	HOXA3_4	ACTGTGGGTGAGTTGAGCAG	1	4	5	0
POU2AF1	POU2AF1_1	ACTGTGGTGTAGGTCGCCAG	61	51	125	28
IRF9	IRF9_4	ACTGTGTCCGCAGGAGGAGG	30	8	153	7
DLX6	DLX6_4	ACTGTGTCTGCTGAAAGCGA	6	5	9	1
ZNF707	ZNF707_2	ACTGTTCCAGGCGAGAGACG	10	18	8	4
HNF4G	HNF4G_3	ACTGTTGAGAGCTCACGCAG	4	0	0	0
NR3C2	NR3C2_4	ACTGTTGTTTGGAATAGCAC	78	158	146	44
ZNF155	ZNF155_1	ACTGTTTACACTTCCCACCC	0	0	0	0
SP9	SP9_1	ACTTACCCCGAGTATAGACG	0	3	4	1
WT1	WT1_6	ACTTCAAGGACTGTGAACGA	73	125	180	56
HOXA11	HOXA11_1	ACTTCAAGTTCGGACAGCGG	25	290	87	64
ZNF480	ZNF480_5	ACTTCACTCTCACCAGACCA	19	76	143	18
ZNF880	ZNF880_4	ACTTCACTCTGCAGATTCCG	17	39	64	9
MYRFL	MYRFL_2	ACTTCAGAGCAGGAGAGCAC	36	43	96	14
THAP8	THAP8_3	ACTTCAGGTTGTGACCGCTC	11	9	43	5
RFX8	RFX8_6	ACTTCAGTCATGCCTAGAGG	4	42	33	18
SP110	SP110_2	ACTTCATGCACCAGAAGCTG	4	31	3	7
ZNF140	ZNF140_7	ACTTCCCTTTTCCCCAGCCA	26	61	83	9
ZNF829	ZNF829_3	ACTTCTACAAGCAGTATCCA	4	8	22	1
ZNF354C	ZNF354C_7	ACTTCTCTTTCCACCATGCA	10	6	25	4
RFX3	RFX3_6	ACTTGCTGTACCACCTGCGT	89	113	140	31
ZNF219	ZNF219_3	ACTTGGCAGCGGAACTCCGG	33	110	78	12
ZNF841	ZNF841_5	ACTTGGCTCACCACAGTCCA	12	106	54	27
ZSCAN23	ZSCAN23_1	ACTTGGGTATAATTTGCGAG	10	17	52	3
MITF	MITF_6	ACTTGGTGGGGTTTTCGAGG	3	6	46	1
PGR	PGR_2	ACTTGTCAGCAAAGAACTGG	2	41	0	15
ATF1	ATF1_3	ACTTGTGCCCAGCAATCAGG	42	16	129	3
ZNF223	ZNF223_7	ACTTTTCCTCCCTTAGAAAG	6	14	4	7
ZNF221	ZNF221_5	ACTTTTCCTTCCCTAAGAAG	5	102	2	29
ZNF394	ZNF394_5	ACTTTTGCCCGTGAAAGTGG	1	25	19	11
ZNF345	ZNF345_5	AGAAAACAGGGATCTCAGGA	3	43	12	24
ZEB2	ZEB2_6	AGAAAACTGGAGGAACGCGA	28	0	90	1
ZNF331	ZNF331_5	AGAAAAGTCTATGGCTACGT	5	12	0	0
NANOGNB	NANOGNB_3	AGAAACAATCAGCTATGCCT	5	7	0	4
GCM1	GCM1_7	AGAAACCAAGTTAGAAGCTG	20	26	24	10
ZMAT1	ZMAT1_7	AGAAAGAAGAACGTAAGCAC	0	0	0	0
ZSCAN16	ZSCAN16_2	AGAAAGACGGGACATACTCA	24	21	34	9
SRCAP	SRCAP_6	AGAAAGAGGAACGGGCCCGG	17	0	31	0
PITX2	PITX2_2	AGAAAGATAAAAGCCAGCAG	6	0	0	0
TMF1	TMF1_4	AGAAAGATGAGCAGATCCGA	26	71	35	42
SP140L	SP140L_5	AGAAAGCCCGGAAGCAAGGA	5	5	0	0
ZNF652	ZNF652_1	AGAAAGTCAGCGTTACACAA	27	7	58	8
EEA1	EEA1_2	AGAAAGTCATAAACAAGCCC	37	47	99	6
ZNF121	ZNF121_5	AGAAAGTGTCTCTCCAGCAG	7	6	6	0
ZNF141	ZNF141_4	AGAAAGTTCATACTGGAGAG	32	79	110	18
MYB	MYB_1	AGAAATACGGTCCGAAACGT	5	2	0	1
ONECUT2	ONECUT2_4	AGAAATCAACACCAAAGAGG	4	8	3	0
ZNF22	ZNF22_1	AGAACAAGCGCAAAACAGGC	5	11	19	2
TBPL1	TBPL1_1	AGAACAATAGACCTCATGCC	81	90	179	23
STAT1	STAT1_1	AGAACACGAGACCAATGGTG	4	15	45	8
CHCHD3	CHCHD3_3	AGAACAGCTGGCTAGACTGG	12	12	45	4
NR1I3	NR1I3_4	AGAACAGTCAGCAAAAGCAT	6	5	14	5
NCOA2	NCOA2_4	AGAACCACCAAACCTGCCCA	81	131	236	39
PHF20	PHF20_1	AGAACCACTCATCATAACGA	1	4	0	0
NR1D2	NR1D2_7	AGAACCCTCACTGTGACAAG	10	71	43	12
TLX2	TLX2_7	AGAACCGACGCACCAAGTGG	3	33	1	4
TLX1	TLX1_4	AGAACCGGCGGACAAAGTGG	41	72	75	33
THRB	THRB_2	AGAACCGGGAGAAAAGACGG	18	23	24	9
PBX3	PBX3_3	AGAACCTCCAGAGGCTGCCG	20	73	35	22
LHX1	LHX1_4	AGAACCTGGGCGCCAAGCGG	14	77	71	12
ZNF770	ZNF770_3	AGAACGACCACAAGGGAAAG	64	135	222	32
ZNF160	ZNF160_2	AGAACGCCGGAATGTGTCAA	38	28	100	2
TFDP2	TFDP2_6	AGAACGGATAAAGCAGAAGC	7	18	27	4
MAZ	MAZ_2	AGAACGGCTACAATCTCCGG	0	4	0	0
TBP	TBP_3	AGAACTGAAAATCAGTGCCG	14	7	13	1
ZNF695	ZNF695_1	AGAACTGATCATCTGTCTGG	30	22	111	7
EBF4	EBF4_1	AGAACTGCCTGAAGAATGCG	23	19	43	7
ZNF500	ZNF500_1	AGAACTGTCCCCCTATCCCG	3	2	0	1
ATF2	ATF2_5	AGAACTTGTAAGCAGCACAT	6	62	44	16
CEBPZ	CEBPZ_3	AGAAGAAAGCCAAATACCAG	13	17	59	4
ZNF33B	ZNF33B_4	AGAAGAACCATGGAGACTGG	50	104	164	31
ZNF207	ZNF207_4	AGAAGAAGCAGCTGAAGCCG	4	0	1	0
L3MBTL1	L3MBTL1_6	AGAAGAAGGAAAGGACCCAG	21	52	90	15
STAT5A	STAT5A_7	AGAAGACCTCATCCTTGGGG	26	19	81	3
NFIL3	NFIL3_7	AGAAGACTCCACAACAGGTG	8	12	34	7
ZNF33A	ZNF33A_4	AGAAGAGCCATGGAAACAGG	6	59	7	15
ZNF334	ZNF334_4	AGAAGAGCCATGGATAGTGG	34	72	109	24
ZNF300	ZNF300_4	AGAAGAGCCATGGATCATAA	28	18	46	1
USF2	USF2_2	AGAAGAGCCCAGCACAACGA	2	244	11	102
ZNF500	ZNF500_7	AGAAGAGCCGGAAGAGCTGG	20	23	57	3
ZNF268	ZNF268_3	AGAAGAGCTGTGTATGGTGC	5	13	0	2
ZNF837	ZNF837_6	AGAAGAGGCCCGAGGAGCCG	3	0	6	10
PURA	PURA_4	AGAAGATTCAAGAGAAGCAG	2	25	35	6
MNT	MNT_6	AGAAGATTGCCACGCAGCAG	8	45	49	23
ZNF793	ZNF793_6	AGAAGCACCATGGATTGGTG	0	0	0	0
ZNF503	ZNF503_3	AGAAGCAGTAAGCACAGCGG	51	35	175	23
MSX1	MSX1_5	AGAAGCCCGAGAGGACCCCG	10	11	11	0
CDX2	CDX2_5	AGAAGCGCAGGAAGGCGCGG	3	1	21	2
SMAD3	SMAD3_1	AGAAGCGCTCCGAATTGGAG	5	3	5	0
PITX2	PITX2_4	AGAAGCGGCAAAGGCGGCAG	3	17	0	4
RORA	RORA_7	AGAAGCTATACAGTATGTGG	5	36	9	11
ZNF268	ZNF268_1	AGAAGCTGTCCGGACCCTGG	21	35	57	14
ZFP82	ZFP82_1	AGAAGCTTAATAGTGCTGAC	2	0	3	0
ATF3	ATF3_6	AGAAGGCACTCACTTTCTGC	3	21	5	1
ZNF398	ZNF398_3	AGAAGGGGAACATAATACAG	5	10	0	0
MECP2	MECP2_5	AGAAGGGTCAGGCTCCGCCC	25	33	76	9
MYBL2	MYBL2_1	AGAAGTATGGCACAAAGCAG	3	0	2	1
MSX1	MSX1_6	AGAAGTCATGTCAGCAGCCG	43	33	46	5
POU2F1	POU2F1_2	AGAATCAACCCACCAAGCAG	1	0	1	0
ISX	ISX_1	AGAATCAGCGAGCCAAGTGG	84	232	248	61
HHEX	HHEX_6	AGAATCGACGCGCTAAATGG	11	32	31	2
HSFY2	HSFY2_5	AGAATCGTCTGTCTTAAGCA	53	63	183	28
ZNF101	ZNF101_4	AGAATCTGTACCAAAACCTG	38	4	34	4
CDC5L	CDC5L_6	AGAATGGTCCAGAGAAGAAG	0	1	3	0
ZHX1	ZHX1_6	AGAATTAACAACTGGGACAG	23	18	40	12
FOXJ1	FOXJ1_6	AGAATTCCTGCAGCCACTGC	14	95	29	20
SOX5	SOX5_1	AGAATTTATAGGGAATCCCG	1	0	14	4
FOXD4L3	FOXD4L3_3	AGAATTTGTCCCCGACCGCG	13	3	42	1
ZSCAN18	ZSCAN18_1	AGACAAATTCCCGGAAACGC	66	80	101	26
ZNF404	ZNF404_2	AGACAACAGAGACCTAAAGT	19	39	31	14
YBX3	YBX3_2	AGACAACGTACATTCCGGGG	30	28	96	3
ZNF234	ZNF234_7	AGACAAGATCCAAAGTGAGG	11	40	27	13
ZNF433	ZNF433_1	AGACACAGGATAATGCACCG	62	504	101	155
ZNF442	ZNF442_1	AGACACATAATAGTACAACG	16	2	60	2
ZNF136	ZNF136_7	AGACACATCAAAGATCACAG	10	30	59	22
ZNF563	ZNF563_4	AGACACATGGTAGTGCAAGG	15	12	19	5
ZNF439	ZNF439_1	AGACACATGGTAGTGCACAG	0	9	16	4
TBX15	TBX15_5	AGACACCTGGATGAGACAGG	4	3	5	2
GLMP	GLMP_1	AGACACCTGTCAGCTAGAGG	4	10	20	3
HNF1A	HNF1A_1	AGACACGCACCTCCGTGACG	53	79	178	27
ZNF562	ZNF562_2	AGACAGCATCAGTGTGCACA	27	82	16	23
ZNF670	ZNF670_1	AGACAGGATGTGCCTATGAA	8	6	14	2
ZNF132	ZNF132_1	AGACAGGGCATTACCAAGTG	0	0	0	0
MEIS3	MEIS3_2	AGACAGTGCCCGCAGTACCA	24	14	60	6
HIVEP1	HIVEP1_4	AGACAGTGGGGAGAGCGAGG	5	3	16	4
ZNF502	ZNF502_3	AGACATCAGAAACTTCACAG	15	26	6	3
ZNF441	ZNF441_5	AGACATGAAAGAACACACAG	2	0	5	2
ZNF813	ZNF813_3	AGACATGAAAGTCATCACAC	32	133	127	50
ZNF705E	ZNF705E_2	AGACATGAGAAAACTCACAC	10	0	16	0
ZNF280C	ZNF280C_3	AGACCCACCATCAAATCCAG	19	262	79	54
HMGA2	HMGA2_5	AGACCCAGGGGAAGACCCAA	29	70	87	19
NFE2L1	NFE2L1_7	AGACCCAGTTCCACAACCTG	47	73	141	27
DBX1	DBX1_1	AGACCCTTCGAAGTAGGGAA	2	12	13	5
BHLHE40	BHLHE40_6	AGACCTACAAATTGCCGCAC	15	4	41	3
ZNF214	ZNF214_7	AGACCTACTGAGAGATTCAA	31	125	91	45
NKX3-2	NKX3-2_4	AGACCTAGAGGAGGAAGCCG	0	0	0	0
TEAD4	TEAD4_7	AGACCTCAACACCAACATCG	67	113	290	40
ETV3L	ETV3L_3	AGACCTCTGGGGATAAGAAG	1	14	7	5
SPI1	SPI1_1	AGACCTGGTGCCCTATGACA	12	71	21	25
GATA1	GATA1_3	AGACGACCACCACGACACTG	20	118	1	60
YBX1	YBX1_1	AGACGCTATCCACGTCGTAG	5	19	13	4
DLX5	DLX5_1	AGACGGATGGTGCATAGCTG	5	1	1	0
ZSCAN1	ZSCAN1_3	AGACTCACCCAGCAAGCCAG	5	0	0	0
ZNF624	ZNF624_3	AGACTCCACTCTTTCCAGAG	10	3	18	6
ZHX1	ZHX1_5	AGACTCCAGTGATGAAACCA	11	34	36	5
ZNF317	ZNF317_7	AGACTCCATCTAAAACCAAG	14	28	22	13
ZNF14	ZNF14_5	AGACTCTGTGAAAGTAGAAG	9	8	10	0
KLF8	KLF8_5	AGACTGCACTACCACTGGGA	33	45	74	17
REST	REST_6	AGACTGCCCCATTACCTGGG	25	128	100	45
ZNF608	ZNF608_5	AGACTGCTGGAAATCGGCGG	81	173	290	73
ZNF827	ZNF827_7	AGACTGGGAGCTAAAAGGGG	6	0	4	0
ZNF688	ZNF688_3	AGACTGGGAGGAGCTCGGAG	26	31	115	12
TTF1	TTF1_4	AGACTGTTCATTCACCAGGG	43	78	132	29
ZNF284	ZNF284_5	AGACTTACTCACCTTGAACA	80	93	121	36
ZFP82	ZFP82_3	AGACTTCTCTCCAGAAGAGT	4	4	13	0
PHF19	PHF19 _5	AGACTTGATGTCCAAACTGA	2	1	13	0
THAP6	THAP6_1	AGACTTGATGTGAATGCAGC	6	5	13	7
ZNF549	ZNF549_6	AGAGAAACACATCAGAAAGG	12	10	24	1
FAM170A	FAM170A_6	AGAGAAACCAGAAGCAAAGG	4	0	1	0
ZFAT	ZFAT_2	AGAGAAGCACATGGAAGAAG	15	6	44	0
HMG20B	HMG20B_7	AGAGAAGCAGCAGTACATGA	16	10	23	1
REST	REST_5	AGAGAAGCAGGCAAAAGCCA	21	8	69	3
GLIS2	GLIS2_6	AGAGAAGCGGGAGAGGACGC	6	10	36	3
ZNF366	ZNF366_7	AGAGACACCTCACCACGCAC	5	56	32	8
ZNF415	ZNF415_2	AGAGACCAACGCGATAGAAG	7	11	36	20
NAIF1	NAIF1_2	AGAGACCACCTATCACACGC	33	14	29	1
ZGPAT	ZGPAT_7	AGAGACCGTTCCTAAAGCAG	29	191	96	39
ZNF496	ZNF496_4	AGAGACGCCGAGAGGACTCG	26	82	69	27
THAP10	THAP10_3	AGAGACGTCAAAACAGGCTG	8	17	36	18
ZNF343	ZNF343_5	AGAGACTGAGTCCAGAGCAG	23	95	122	38
MYNN	MYNN_1	AGAGAGACTGAACAAACAGC	0	1	0	0
HNF1B	HNF1B_4	AGAGAGAGAGGCCTTAGTGG	0	2	0	1
SAFB2	SAFB2_7	AGAGAGAGCGCCAGAGGCAG	12	9	13	6
ZNF135	ZNF135_3	AGAGAGCCTGGCAGTGCCGG	93	90	213	24
HOXD10	HOXD10_7	AGAGAGGAGCTGCCTGGCTG	16	47	43	14
FBXL19	FBXL19_4	AGAGAGGCACCTGAAGAAGG	3	1	0	0
FOXO3	FOXO3_1	AGAGAGGCGCATCATCGTCC	0	0	0	0
FOS	FOS_7	AGAGAGGCTATCCCCGGCCG	9	7	18	2
HESX1	HESX1_1	AGAGAGTTGAGTTGGTATAG	12	61	10	20
VEZF1	VEZF1_4	AGAGATAAGGGGAACCACCG	44	24	174	11
ZNF449	ZNF449_3	AGAGATAGAGACCTGGGTGA	13	42	23	21
ONECUT1	ONECUT1_1	AGAGATCAATACCAAAGAGG	13	17	28	6
ZNF500	ZNF500_5	AGAGATCCTGATTGTGAAGG	31	13	144	12
KLF16	KLF16_5	AGAGATGGCCATGAGCACGT	8	10	44	6
HNF4G	HNF4G_4	AGAGCAACAGGAAAACACTA	1	7	21	0
ZNF675	ZNF675_2	AGAGCAACCCTACAAATGTG	5	7	24	2
ZNF75A	ZNF75A_4	AGAGCAAGGGGAAGAGCCAT	26	42	60	7
NR2F2	NR2F2_5	AGAGCAAGTGGAGAAGCTCA	0	0	0	0
TGIF2LY	TGIF2LY_6	AGAGCACAAGAAGAAGCGCA	72	112	179	42
RBPJL	RBPJL_7	AGAGCACACCACCATTCTGA	8	1	46	0
MYOD1	MYOD1_3	AGAGCACTCGCACTTCCCCG	38	149	151	40
TERB1/CCDC79	TERB1/CCDC79_1	AGAGCACTGGAGGAAAGCAA	0	0	0	0
GATA1	GATA1_5	AGAGCAGGATCCACAAACTG	7	29	3	18
DUXA	DUXA_3	AGAGCAGGGCAAGATTCCTG	42	30	70	11
KAT7	KAT7_2	AGAGCCAAACGATACTCCGC	0	0	2	0
ZNF667	ZNF667_5	AGAGCCAGTAAGAAGACGCC	15	63	42	33
ZNF607	ZNF607_2	AGAGCCATGGATGATTGTGA	1	0	0	0
UNCX	UNCX_4	AGAGCCCGGGCTGCAAGCGG	15	18	34	5
ZNF546	ZNF546_2	AGAGCCCTGGATAGTAATGA	6	33	27	18
NFAT5	NFAT5_7	AGAGCCCTGTAACACAGCAA	35	66	125	19
FOXI1	FOXI1_2	AGAGCCGAGTAGGAATAGGG	0	0	0	0
FEZF1	FEZF1_6	AGAGCCTCGGCTGAAATCCG	38	59	113	13
OLIG1	OLIG1_1	AGAGCGAACTGGCCGCACGG	25	62	32	20
HOXC4	HOXC4_2	AGAGCGACTGTGATTTCTCG	30	37	119	23
ZNF671	ZNF671_4	AGAGCGAGGAGAAGAGCCCT	17	0	32	0
SETBP1	SETBP1_3	AGAGCGCATGGAGCCAGAGG	7	10	2	0
DPF3	DPF3_5	AGAGCGTCCACAGTCTGCGC	16	32	27	23
ZNF232	ZNF232_3	AGAGCTAGTGCAGACTAGGA	3	27	3	8
ZNF628	ZNF628_7	AGAGCTCAGGCACCACGGGC	14	2	33	0
FOXO6	FOXO6_1	AGAGCTCTCGGCGGAACGCG	6	8	16	1
ZNF785	ZNF785_6	AGAGCTCTGCAGCTTTCAGC	9	10	9	0
SP6	SP6_4	AGAGCTGCAGAGCCTCCCGC	5	5	5	4
BARHL1	BARHL1_6	AGAGCTGCCCGGGCTGCAGG	58	94	130	26
STAT4	STAT4_5	AGAGCTGTAGTGTTTACCGA	0	0	0	0
SP8	SP8_2	AGAGCTGTCCGAGAGGGAGG	0	2	14	0
SATB2	SATB2_1	AGAGCTGTGAGAATACCCCA	2	62	2	23
ZNF157	ZNF157_5	AGAGCTGTGGATATTAGAGG	3	4	1	3
MYSM1	MYSM1_2	AGAGCTGTTTGAACAAGGGC	3	11	9	0
NPAS4	NPAS4_4	AGAGCTTGAGGACATCGTAG	10	12	51	5
ZNF484	ZNF484_1	AGAGCTTGCTTATGATGCAG	0	27	0	8
VEZF1	VEZF1_1	AGAGCTTGTGTCGATTGAGA	68	7	115	1
ZNF569	ZNF569_3	AGAGGAAATGACTGAGTCCC	87	33	200	7
ZNF396	ZNF396_6	AGAGGAACCTATGAACAAGA	0	0	0	0
ZNF100	ZNF100_4	AGAGGACACATTCCATACCT	97	117	319	42
ZNF398	ZNF398_7	AGAGGACCAGGCAGGGCCAG	2	0	11	0
KLF11	KLF11_4	AGAGGACTGGAGAACATCCG	12	46	29	8
HKR1	HKR1_3	AGAGGAGAGAAAATGTCCAC	2	12	6	4
ZUFSP	ZUFSP_5	AGAGGAGCACAGTGAAGATA	66	88	158	35
SPIB	SPIB_3	AGAGGAGGAAGACTTACCGT	15	15	17	2
FOXP1	FOXP1_3	AGAGGAGGAGACACATGTCG	2	28	14	13
CSRNP1	CSRNP1_1	AGAGGAGGAGGAGGAGACCG	0	0	0	0
ZNF623	ZNF623_7	AGAGGATCCATACTGGGGAG	29	58	87	7
LEF1	LEF1_6	AGAGGATGGACCGCATGGGA	61	177	116	52
ZNF135	ZNF135_4	AGAGGCAGAGCTGTGGGCGG	0	0	0	0
MESP2	MESP2_4	AGAGGCGCAGACGCAGGCGG	24	11	65	0
NKX6-1	NKX6-1_3	AGAGGCGGACGAGGAAGAGG	2	3	10	1
ZNF397	ZNF397_4	AGAGGGAGTTTGATGACCCA	32	41	97	10
ZNF648	ZNF648_6	AGAGGGCACCGCTGACCCGG	1	0	0	0
IRF3	IRF3_2	AGAGGGCCCCAGGTTTGGGA	20	32	45	4
ISX	ISX_3	AGAGGGCCCCGGAGAAGCTG	7	6	4	0
AKAP8L	AKAP8L_1	AGAGGGCCTTGAAGGCACCG	22	33	30	11
ZNF197	ZNF197_4	AGAGGGCCTTGTGAAGGGGA	2	0	0	0
CAMTA2	CAMTA2_7	AGAGGGGCCAGACATATGGA	14	21	53	16
AC138696.1/ZFP41	AC138696.1/ZFP41_2	AGAGGGGCCATGGATGCTGG	8	11	7	2
DZIP1	DZIP1_6	AGAGGGGCCCGACGTCGCTG	14	57	43	25
KCNIP3	KCNIP3_4	AGAGGGGCTGGACCAGCTGC	45	43	78	12
PRDM1	PRDM1_7	AGAGGGGCTTGGAGTGGTGG	3	4	1	2
MSANTD1	MSANTD1_4	AGAGGGGTGGACTTAGCGGG	40	86	50	21
ZNF503	ZNF503_2	AGAGGGTCCTTACCTCGATG	83	86	228	40
ZNF316	ZNF316_3	AGAGGTAGTGCAGGATGCGC	85	206	198	62
ZNF384	ZNF384_6	AGAGGTCAGGGACAACCTGC	22	18	88	20
FOXQ1	FOXQ1_6	AGAGGTGCAAGCAGGAGGGG	2	6	8	0
CUX1	CUX1_1	AGAGGTGGCTCAGAGAGAGG	1	0	0	1
ZBTB7C	ZBTB7C_7	AGAGGTGTGGAAAGAAGTCC	7	0	6	0
LIN28A	LIN28A_6	AGAGTAAGCTGCACATGGAA	1	0	3	0
ASCL3	ASCL3_1	AGAGTAAGGGGATGACACCG	4	0	1	1
ELF3	ELF3_6	AGAGTACTGGGACTGTCTCG	0	0	0	0
ZNF263	ZNF263_3	AGAGTCACCGAGCTTCAAGC	37	42	143	29
ZNF215	ZNF215_4	AGAGTCATGTGTCTCCACGA	23	5	77	4
TCF7	TCF7_6	AGAGTCCAAGGCAGAGAAGG	6	0	26	3
POU3F4	POU3F4_6	AGAGTCCGCATGGACTAGGG	1	16	1	1
ZBTB24	ZBTB24_3	AGAGTCGATACAGCAAGCGG	0	0	6	0
MITF	MITF_3	AGAGTCTGAAGCAAGAGCAC	1	2	9	3
TBX22	TBX22_2	AGAGTGAAAGAAGGCCTCCA	30	0	46	4
ZFP82	ZFP82_4	AGAGTGGGAATACCTGGACT	32	145	115	58
TFAP2D	TFAP2D_6	AGAGTTCAGAGAGTAGGCGT	4	18	2	5
POU5F2	POU5F2_1	AGAGTTGCAGCAATTGGCCA	104	28	331	12
SON	SON_5	AGAGTTGCCAGAGCAGCCTG	6	6	1	1
ZNF365	ZNF365_1	AGAGTTGGCCCAGAAAACTG	9	4	0	0
SP7	SP7_1	AGAGTTGTTGAGTCCCGCAG	15	4	31	2
SCMH1	SCMH1_2	AGAGTTTCTCCAGGAAGCGG	15	22	51	6
TEAD1	TEAD1_2	AGATACATCAAACTCAGGAC	4	80	13	6
ZNF25	ZNF25_6	AGATACCAGGAAAGCCAAGC	5	0	6	0
TBX1	TBX1_7	AGATAGCGAGAAATATGCCG	1	25	22	12
ELF5	ELF5_4	AGATCAGTCCACGACATCAG	4	26	3	10
ZNF619	ZNF619_4	AGATCCCTGGACACTTGCTG	10	34	27	6
PGR	PGR_3	AGATCCTACAAACACGTCAG	41	43	143	13
ZNF160	ZNF160_5	AGATCCTCTGAGCAGGGTCC	0	0	0	0
TFAP4	TFAP4_2	AGATCGCCAACAGCAACGAG	3	6	25	2
ZIM2	ZIM2_1	AGATCGGGACTCATAAGCCC	20	87	57	21
CENPBD1	CENPBD1_2	AGATCTTGCTATCTCTACAG	1	12	6	2
SP140	SP140_1	AGATGAAGGAGCGGTCTCGG	24	121	81	36
HES4	HES4_1	AGATGACCGTGAGACACCTG	19	20	24	8
PA2G4	PA2G4_4	AGATGAGAAGAAGGCTCGGA	4	7	0	0
SOX15	SOX15_7	AGATGAGGAGGCAGCAGCCG	0	1	0	0
KLF12	KLF12_7	AGATGCTGTCATGGAAACTG	29	103	92	30
NR1D2	NR1D2_4	AGATGGAACAGAAGAGGAGG	0	0	0	0
ZNF497	ZNF497_3	AGATGGAGTCCCCAAGAGGG	0	4	9	1
SPIB	SPIB_1	AGATGGCGTCTTCTATGACC	42	39	153	14
ELF1	ELF1_2	AGATGGGATTCCTGAAGTGA	40	51	89	1
ZNF563	ZNF563_5	AGATGGGCCGAATAAATGCA	7	44	23	21
SMAD4	SMAD4_5	AGATGGGGCTAACAGAGCTG	33	62	104	15
ZZZ3	ZZZ3_7	AGATGGTTCAGGTTCTCCGG	23	39	77	6
PURB	PURB_3	AGATGTGAAGCAGAACGCCA	13	60	59	24
KIN	KIN_5	AGATGTGCCAGAAGCAGTGC	32	25	42	6
TEF	TEF_1	AGATTCGCCATCATATGGGA	28	109	64	35
ZNF528	ZNF528_3	AGCAAACGATCCAGACGGCA	16	10	46	2
EEA1	EEA1_5	AGCAACTCCTATAAACACAG	5	18	0	3
ZNF160	ZNF160_3	AGCAAGAAAACCAAGAACGC	14	17	74	3
ZNF609	ZNF609_7	AGCAAGAAGGAGAGAAGCGA	45	3	83	1
ATF6	ATF6_5	AGCAAGGACTGGCTGAGCAG	82	41	183	32
ZNF645	ZNF645_5	AGCACAGGATAACGACAGCG	13	31	54	0
RFX4	RFX4_6	AGCACAGGCAGCATGTGGGG	5	6	28	1
ZNF782	ZNF782_3	AGCACATGGGCCCTGTTGAG	22	44	83	12
ZIC2	ZIC2_1	AGCACATTCTGCGAGCCGTG	17	2	8	3
ZNF843	ZNF843_1	AGCACCGGCAGATTCACCCA	43	259	109	96
HES1	HES1_4	AGCACCTCCGGAACCTGCAG	11	4	9	1
ZNF396	ZNF396_7	AGCACCTTCAGAAATCACTG	6	24	29	17
IRX4	IRX4_6	AGCACGTGCTGCGAGTCCGG	13	16	41	4
ZNF446	ZNF446_2	AGCAGAACCCTCGGAAGCGG	50	44	62	11
CXXC5	CXXC5_7	AGCAGCACCAATGGCAGCGG	3	0	3	0
ZNF598	ZNF598_1	AGCAGCGGTAGCACACCGGG	23	22	49	11
ZNF212	ZNF212_4	AGCAGGCGCCGACTCCGCCA	29	127	69	53
DNMT1	DNMT1_2	AGCAGGCTTGCCAAGAGCGG	8	6	6	0
ZBTB25	ZBTB25_2	AGCAGGGACACCGAATGGCA	12	14	32	6
SMYD3	SMYD3_7	AGCAGTCCGAGACATCGAGG	9	109	47	38
ZNF717	ZNF717_1	AGCATCAAGGTATTCACACG	26	8	84	3
ZNF286A	ZNF286A_1	AGCATCACATCCCTTTGTGC	18	9	31	12
PBX4	PBX4_1	AGCATGCTCTGAATTGCCAT	42	27	116	11
ZSCAN30	ZSCAN30_5	AGCATGGTAGGCCAAGACTG	0	0	0	0
STAT5B	STAT5B_5	AGCATTGTCCCAGAGAACAG	28	11	59	4
CGGBP1	CGGBP1_3	AGCCAACATCCCACTTGAGA	16	16	101	7
RAX2	RAX2_6	AGCCAAGGTGCACCTACCTG	5	1	5	0
TAL2	TAL2_6	AGCCACACTAAGGAATGTGG	14	27	58	11
ZNF157	ZNF157_4	AGCCACATCCTCGAATGACA	32	85	103	26
ZNF853	ZNF853_7	AGCCACCGAGACCTTCGTGC	187	54	492	23
ZBTB39	ZBTB39_4	AGCCAGCACAAATGCAACAG	3	4	21	3
ZNF146	ZNF146_3	AGCCAGCAGAGAATTTACAG	25	74	64	28
NKX1-2	NKX1-2_5	AGCCAGGAAAAGTTTGGCGG	11	68	67	22
HES1	HES1_2	AGCCAGTGTCAACACGACAC	41	70	106	11
ZNF814	ZNF814_3	AGCCATCAACGAGTTCACGC	25	41	32	2
ZNF417	ZNF417_7	AGCCATCAGCGTGTTCACAC	8	20	5	7
ATF5	ATF5_1	AGCCATCCCAGCCCACTAGC	1	5	8	3
ZNF789	ZNF789_5	AGCCATGTTCCCACCAGCCA	13	22	46	4
ZNF229	ZNF229_3	AGCCATTTCCCAAGATAGGG	0	4	5	2
THYN1	THYN1_7	AGCCCAAACAGACAACATGC	84	97	168	44
ZNF610	ZNF610_7	AGCCCAGAAGAGGAAAGCAA	12	16	12	6
ZNF629	ZNF629_2	AGCCCCAACGATGCTCACAG	45	29	83	14
ZNF768	ZNF768_1	AGCCCCGAAGGGTACCTCAG	45	45	106	19
FOXF2	FOXF2_3	AGCCCGCGGGCATCATGTCG	73	57	162	22
ZNF790	ZNF790_7	AGCCCTCACTCACCTGGGCA	21	68	65	27
FOXD2	FOXD2_2	AGCCGAGGCAGACTTAGCCG	37	82	90	25
KAT7	KAT7_5	AGCCGCCGGCAATGCCGCGA	0	6	1	0
NANOG	NANOG_7	AGCCTACCTGTTTGTAGCTG	22	32	106	7
EVX2	EVX2_3	AGCCTGCATGGAGGCAGCGG	35	27	121	13
SCMH1	SCMH1_3	AGCCTGCTGCAACACCACAG	14	55	36	8
CREB3L2	CREB3L2_5	AGCCTGGATGAGAGGCGCCG	17	23	59	3
THAP11	THAP11_6	AGCCTGTAACTCCGACGCGG	46	66	125	14
ZKSCAN1	ZKSCAN1_5	AGCCTGTGGGGACAGACCCG	22	26	49	7
ZNF234	ZNF234_5	AGCCTTATTCACCTTGAATG	22	72	91	18
ZNF611	ZNF611_1	AGCCTTGAGACACATAAGAT	27	33	67	16
ZNF652	ZNF652_5	AGCGAGTGTTAAATACCCTG	5	34	6	9
ZSCAN2	ZSCAN2_4	AGCGCCGGCAGAGCTCTCGG	35	33	45	8
ZNF394	ZNF394_7	AGCGCCTGGACCCAGCACGG	74	88	279	23
FOXC1	FOXC1_1	AGCGCGATGTAGCTATAGGG	0	0	0	0
FOXF1	FOXF1_4	AGCGCGATGTAGGAATAGGG	24	195	65	95
TLX3	TLX3_3	AGCGCGCTTGGCAGAGGCGG	6	0	2	1
BHLHA9	BHLHA9_5	AGCGCGGATGGCCCATCCCG	39	19	45	14
FOXG1	FOXG1_1	AGCGCGTTGTAGCTGAACGG	14	11	16	12
ZNF549	ZNF549_1	AGCGCTAGTGATTACGCCGC	17	93	72	30
USF2	USF2_1	AGCGGAGGAGCAGACAGCGG	9	60	35	17
CSRNP2	CSRNP2_3	AGCGGCAGAAGCAGCTGCGG	10	15	27	4
ZNF304	ZNF304_7	AGCGGCGGTGCTGATGGACC	28	67	108	34
SNAI2	SNAI2_3	AGCGGTAGTCCACACAGTGA	3	9	17	4
TLX3	TLX3_5	AGCGGTCTTTCACGAAGCGG	38	23	147	13
ZKSCAN8	ZKSCAN8_5	AGCGTAACTGCCTGAAGCGC	8	4	23	3
DLX2	DLX2_6	AGCGTAGGAGGTGTAGGCGG	122	21	359	7
SOX21	SOX21_1	AGCGTCTTGGGCTTGCGCCG	88	226	233	79
FOXN1	FOXN1_2	AGCGTGACGTCAGACTGCGG	29	27	97	15
DBP	DBP_5	AGCGTGCGCTCCCACAGCAG	11	46	52	12
FOXJ1	FOXJ1_1	AGCGTGGCATACGAGTAGGG	66	25	114	28
ZNF48	ZNF48_7	AGCGTGGTTCACCCAGGAGC	11	18	22	23
LBX1	LBX1_6	AGCGTTCTGCAGGCAGCCGA	10	15	12	4
ZNF730	ZNF730_2	AGCGTTGACATTTAGAGATG	5	19	15	11
ZNF3	ZNF3_5	AGCGTTTGGAACCTGCTCAG	48	142	111	28
HES5	HES5_2	AGCTACCTGAAGCACAGCAA	41	38	126	11
ZNF169	ZNF169_1	AGCTATTGAGTTCTGCTCAG	65	210	208	77
ZNF804A	ZNF804A_7	AGCTCCACGCATCTCAGCAA	144	56	429	18
DLX5	DLX5_7	AGCTCCTACCACCAGTACGG	36	24	126	9
ZSCAN18	ZSCAN18_6	AGCTCGCCTGGTAGCAGCAG	20	3	38	0
ZNF225	ZNF225_5	AGCTCTACTCACCTTCAACG	8	113	25	38
ZNF230	ZNF230_7	AGCTCTACTCACCTTGAATG	12	27	34	5
STAT4	STAT4_7	AGCTGCAAGACTGGAAGCGG	14	94	62	32
ZNF229	ZNF229_4	AGCTGCTGGACTCTACCCAG	32	6	62	3
CENPX/STRA13	CENPX/STRA13_5	AGCTGGATCCGGCTTCCGGA	34	55	160	17
GMEB1	GMEB1_2	AGCTGGGTCGGAGAACAACA	13	40	34	18
MECP2	MECP2_6	AGCTTCCGGCACAGCCGGGG	17	27	42	15
NR5A2	NR5A2_6	AGCTTGGATCACCTGAGACA	8	10	23	2
SMYD3	SMYD3_4	AGCTTGGCCAGACCACAAGC	1	2	0	0
ZEB2	ZEB2_5	AGCTTGGCTCACGTGTGGGG	15	39	10	2
STAT5B	STAT5B_6	AGCTTGTATCCACACAGCCA	18	92	102	29
DLX5	DLX5_5	AGCTTTGCCATAGGAAGCCG	4	4	4	3
TET1	TET1_7	AGGAAAACAAGAGGCCCCAG	3	1	23	0
ESR1	ESR1_4	AGGAAAGGCGACAGCTGCGG	49	29	153	13
INSM2	INSM2_4	AGGAAAGGGGTTGACGGCGG	12	56	29	22
ZNF205	ZNF205_6	AGGAAATGCCTTCTAAGCTG	10	18	85	4
CPXCR1	CPXCR1_7	AGGAACAACATCTTCCTGGG	4	19	26	7
ZNF491	ZNF491_2	AGGAACATCAGAACTGACAC	17	22	56	13
CEBPG	CEBPG_2	AGGAACCTGCTGTAAGCCGC	77	84	182	21
POGK	POGK_6	AGGAAGAAGAGATTCAGAGC	29	122	89	45
ZNF32	ZNF32_7	AGGAAGAGTTTCCACACCAG	12	24	83	12
ZNF816	ZNF816_6	AGGAAGATTCATACTGGAGA	34	84	79	12
ZNF266	ZNF266_5	AGGAAGCCACAACGGAGGGG	21	45	98	12
SMYD3	SMYD3_6	AGGAAGCCATCCCGTCAGAG	12	49	39	17
ZSCAN16	ZSCAN16_6	AGGAAGCTGGGAAACCACAA	0	7	8	0
HOXB5	HOXB5_6	AGGAAGCTTCACATCAGCCA	28	63	90	27
ZUFSP	ZUFSP_7	AGGAAGGTTTTGATCCTCAG	1	0	0	0
ZNF365	ZNF365_7	AGGAAGTTCAGAGACGAGAG	37	21	52	5
ZNF439	ZNF439_3	AGGAATATGGACCAAAGCCA	25	83	115	28
ZNF701	ZNF701_4	AGGACAAGGCAATACAGAAG	28	26	74	14
ZNF148	ZNF148_3	AGGACAATGGTTGTAATGGG	16	48	56	22
ZNF668	ZNF668_2	AGGACACGCACTTGTAGCGG	32	70	85	39
BATF2	BATF2_1	AGGACCCCAAGGAGCAACAA	35	109	133	19
TERF1	TERF1_7	AGGACCCGCAACAGCGCAGA	23	143	146	56
PITX2	PITX2_6	AGGACCCGTCTAAGAAGAAG	0	0	0	0
ZXDB	ZXDB_2	AGGACCGATCAACCTAGCGG	38	78	81	14
ATF5	ATF5_3	AGGACCTCATAGGGAGCCAG	6	16	23	4
FOXI3	FOXI3_2	AGGACCTGATGAAGATGGTG	1	2	18	0
NEUROG1	NEUROG1_4	AGGACGACGAGCAGGAGAGG	31	9	82	10
SP8	SP8_1	AGGACGAGGAGCGTTTCCAG	32	16	145	0
NKX2-8	NKX2-8_1	AGGACGCGCAACACCTGCCG	31	36	32	22
HES6	HES6_3	AGGACGGCTGGGAGACGCGA	4	48	25	8
ZNF169	ZNF169_2	AGGACTCCTGACAACCAGGA	13	28	69	9
KLF9	KLF9_2	AGGACTCGACCCAGATTCGG	14	16	24	5
MEIS3	MEIS3_3	AGGACTTGGACCAGGAGCGA	18	29	17	14
ZNF616	ZNF616_4	AGGAGAAAGGTTCCAAACAG	7	40	28	3
CBX2	CBX2_5	AGGAGAACATCCTGGACCCG	36	25	84	14
ZNF432	ZNF432_6	AGGAGAAGAACCATGGACAA	33	32	57	14
ZNF354C	ZNF354C_5	AGGAGAAGATCCCTGCATGG	4	59	71	36
FOSL2	FOSL2_1	AGGAGAAGCGTCGCATCCGG	0	0	0	0
ZNF688	ZNF688_1	AGGAGATGTCCCAAACAGGA	4	0	3	0
LMX1B	LMX1B_5	AGGAGCAGCAGAACTCCCAG	53	64	126	18
MEIS2	MEIS2_5	AGGAGCAGCATATAGTCCAG	39	76	68	22
ZBTB32	ZBTB32_7	AGGAGCCAGAGAAACCCTCA	6	11	22	1
ZNF292	ZNF292_7	AGGAGCTGGAGCTACAGCTG	3	10	19	2
POU1F1	POU1F1_4	AGGAGGAAATCCATGACTCA	8	0	35	1
SNAPC5	SNAPC5_7	AGGAGGAGGAGACGCTGCTG	8	0	26	4
HOXC11	HOXC11_7	AGGAGGAGTAGCTGTTCCGA	6	1	28	5
ZNF552	ZNF552_3	AGGAGGCGTTGTTTGCGAAG	0	99	0	29
ZNF587B	ZNF587B_7	AGGAGGCGTTGTTTGTGAAG	22	59	76	26
ZBTB32	ZBTB32_4	AGGAGGTCTGGCGGGAACAG	26	18	130	8
DRGX	DRGX_1	AGGAGGTGTCACCTCTGCCA	33	21	151	5
ZNF296	ZNF296_4	AGGAGGTGTCCTCGGCGGGG	0	16	0	1
ZNF581	ZNF581_5	AGGAGTCACAGAGGGAGCCA	55	61	169	15
MLX	MLX_1	AGGAGTCCTACAAAGACCGG	7	47	24	13
SCML4	SCML4_4	AGGATCCCGGGGAGAAAGCG	0	3	3	3
ETV3L	ETV3L_5	AGGATCCTGCATAAGACCAA	8	6	33	6
ZNF575	ZNF575_5	AGGATCGGTAGCCCCGGCCG	13	28	49	16
ZNF385B	ZNF385B_5	AGGATCTAAACACAAGACCA	31	38	68	21
BHLHE41	BHLHE41_2	AGGATGAAGCTGGATTCCCG	37	20	73	9
HMGA2	HMGA2_4	AGGATGAGCGCACGCGGTGA	113	68	345	27
GPBP1	GPBP1_7	AGGATGCTGGTCATTAAGAA	10	13	27	4
HIF1A	HIF1A_3	AGGATGCTTGCCAAAAGAGG	3	1	2	0
ZFP3	ZFP3_7	AGGATGTGAAGAAGACATGT	12	76	43	19
IRF8	IRF8_3	AGGATGTGTGACCGGAATGG	4	3	2	5
ZNF709	ZNF709_7	AGGATTTGGAGTCTGACTGA	26	91	85	34
ZNF582	ZNF582_4	AGGCAAAGAGCCCTGGATGG	30	71	70	18
IRF9	IRF9_2	AGGCAAGCAGGACTTCCGGG	7	9	14	1
SOX5	SOX5_7	AGGCAATCATGCGCAACAGG	48	34	105	16
ZNF432	ZNF432_1	AGGCACAGTCGAATCTGTCC	52	136	205	34
ZNF627	ZNF627_5	AGGCACATCAGAGATCACAC	0	1	0	0
ZNF433	ZNF433_2	AGGCACATCAGAGATGACAC	40	257	90	89
IKZF4	IKZF4_1	AGGCACCACACTGGTTGCAA	12	36	63	5
ZNF625	ZNF625_5	AGGCACCACAGAGCTGACAC	3	24	12	10
NRL	NRL_1	AGGCACTGAGCTGTAAGGTG	18	18	51	7
CTCFL	CTCFL_6	AGGCAGAGGTGACACAGGTG	2	0	4	0
VENTX	VENTX_1	AGGCAGATTTGAGGACCCGG	0	5	0	0
ZBTB7C	ZBTB7C_4	AGGCAGCCAGGACGGAGCGG	12	0	0	2
JAZF1	JAZF1_6	AGGCAGCGAGTATGACGAGG	56	76	121	34
RARB	RARB_5	AGGCAGGAGCTGGTTGGCAA	4	0	0	0
NEUROG1	NEUROG1_6	AGGCAGGGGACGCACTGCGG	26	36	21	9
ZNF148	ZNF148_5	AGGCATAAGAGAACTCATAG	46	63	90	22
AEBP2	AEBP2_6	AGGCATATGCTGACACACAG	1	0	3	0
E2F2	E2F2_4	AGGCCAAGAACAACATCCAG	14	0	50	0
ZNF428	ZNF428_4	AGGCCACCTTACCTGGGGAA	21	64	67	25
CUX1	CUX1_5	AGGCCAGCCTCACCAAGCTG	10	49	41	18
ZXDA	ZXDA_3	AGGCCCCATCAACCTAGCGG	2	4	11	0
IKZF1	IKZF1_7	AGGCCCCGCACTGATTGCAC	43	16	118	8
FOXI2	FOXI2_5	AGGCCCGGGACCCGAAGCGT	30	51	93	4
LHX2	LHX2_5	AGGCCGCCAGATCCGCACCG	22	48	67	31
ZNF318	ZNF318_3	AGGCCGGTGGGAAGAGACGG	4	11	16	2
ZSCAN21	ZSCAN21_5	AGGCCTAGGGCCCAGAACTG	0	0	0	1
NR2E3	NR2E3_3	AGGCCTGGCACTGGTTGCGG	7	1	22	1
GLIS3	GLIS3_4	AGGCCTGGTCAACCACATGG	87	115	188	39
ZNF264	ZNF264_3	AGGCCTTACCCAGAGACACC	36	43	42	12
FERD3L	FERD3L_6	AGGCCTTTGACCAGCTGCGG	181	93	557	33
ZNF169	ZNF169_7	AGGCGACGAACCTTGGAGAG	87	78	226	34
KCMF1	KCMF1_2	AGGCGATCCTAATCATGTCA	31	18	38	16
ZNF346	ZNF346_1	AGGCGCAGCAAACCTTACAC	17	1	53	2
TFEB	TFEB_6	AGGCGCAGCAGGAGGAGCAG	11	13	26	14
KLF13	KLF13_7	AGGCGCTGTCCTTACCGTCG	22	43	106	27
ZNF165	ZNF165_2	AGGCGGCTCAGTGCCTCGCG	42	25	26	5
ZNF79	ZNF79_2	AGGCGGGACTCAAATGCTGG	7	9	5	1
ETV3	ETV3_3	AGGCGGGTGAAAATGAAAGC	0	0	1	0
ZNF503	ZNF503_7	AGGCGGTTGGCCTGGCGCAG	7	11	24	6
OVOL1	OVOL1_5	AGGCTCATGTTCAAAGCCAG	13	7	29	8
DUX4	DUX4_1	AGGCTCGCAGGGCCTCGCTT	0	0	0	0
ZNF709	ZNF709_6	AGGCTCTGTGAAAGGAAAGA	9	0	20	3
ZNF175	ZNF175_6	AGGCTGAAGTCTCACATCAG	18	23	38	4
TCF4	TCF4_4	AGGCTGATTCATCCCACTGG	5	10	14	2
DLX6	DLX6_1	AGGCTGGAATAAATGGTCCG	23	31	26	17
FOXJ3	FOXJ3_1	AGGCTGGCATAACTGTATGG	4	0	6	0
TBX20	TBX20_6	AGGCTGGTCAGCTCACCCAG	10	22	38	3
AR	AR_4	AGGCTTCCGCAACTTACACG	43	57	176	24
ZNF133	ZNF133_3	AGGGAAAGAGACCTGGAGAG	37	180	114	59
PHF20	PHF20_4	AGGGAACCCAAAAGAAAACG	4	56	0	9
RBAK	RBAK_1	AGGGAACCCTCACTGTACAT	34	95	85	40
HMGN3	HMGN3_6	AGGGAAGAAGGAGGAAAAGC	0	5	0	2
FOXE3	FOXE3_1	AGGGAAGCCAGAGAACGCGG	14	7	22	1
ARNTL2	ARNTL2_5	AGGGACAAGACCAACAGCTA	5	23	15	2
ZNF710	ZNF710_4	AGGGACACAGACGGACGCCG	5	9	4	3
SOX3	SOX3_3	AGGGACACCCACACAAGCGG	0	0	0	0
ZNF805	ZNF805_2	AGGGAGAACGCTTGAGACCA	77	82	142	30
NFIL3	NFIL3_5	AGGGAGCCAAGAGATGACCG	31	60	111	14
JDP2	JDP2_5	AGGGAGCCTGTGGTCACCGA	195	34	536	5
AHCTF1	AHCTF1_6	AGGGAGGAAGGCGTGAATGA	0	0	0	0
MYBL1	MYBL1_1	AGGGATGGCTCATTGAACGA	21	35	112	13
ZNF420	ZNF420_5	AGGGATTATTTGGAAGCCAA	0	0	0	0
ETV3	ETV3_5	AGGGATTGGAGAGACAGCGA	0	0	0	0
RUNX3	RUNX3_5	AGGGCACCGGCAGAAGCTGG	1	0	0	0
BAZ2A	BAZ2A_2	AGGGCAGCCACCGATGGCAG	16	26	67	15
CENPA	CENPA_7	AGGGCAGCTTCCTTATCAAG	35	38	63	20
FOXD4L1	FOXD4L1_2	AGGGCAGGGGCCCCAAGCAG	23	51	44	8
ETV3L	ETV3L_7	AGGGCCACCAGAGACCTCTG	0	0	2	0
TCF23	TCF23_2	AGGGCCACCAGCCATGCCAG	0	3	7	0
SNAPC2	SNAPC2_4	AGGGCCACTGGAAGAAGCCC	0	1	1	1
ZBTB17	ZBTB17_6	AGGGCCAGCTGAGGTCAAGG	7	0	4	1
CCDC17	CCDC17_5	AGGGCCCCGCGAACACCCTG	18	31	50	16
ZNF574	ZNF574_2	AGGGCCCGGAGGAACAACAG	4	3	2	0
GZF1	GZF1_5	AGGGCCGGAGGAGGAAGAGG	0	0	0	0
KDM5B	KDM5B_2	AGGGCCTCTCCAGTGAGCGG	42	237	225	64
NCOA3	NCOA3_4	AGGGCCTGGTGAAATCCCCA	5	10	10	1
NFXL1	NFXL1_3	AGGGCGAGAGAAGGGGTCGG	23	15	53	8
MYC	MYC_4	AGGGCGAGCAGAGCCCGGAG	9	17	22	4
TCF3	TCF3_3	AGGGCGAGCAGGTGCCACGG	39	18	149	7
ZNF408	ZNF408_2	AGGGCGAGGGAGTAAAGCCA	17	16	52	5
SOX17	SOX17_1	AGGGCGAGTCCCGTATCCGG	14	5	37	0
ATOH8	ATOH8_5	AGGGCGCACAGTGGACTCCG	20	90	2	21
ASCL4	ASCL4_6	AGGGCGGAATGCAACAGCGA	29	9	37	3
FOXI1	FOXI1_5	AGGGCGTGCCCAGCCCTCAG	12	45	60	14
ZNF512	ZNF512_5	AGGGCTCCCTACCTTCAGCC	18	78	47	19
LCORL	LCORL_1	AGGGCTCCGGCACTGAGCGG	15	143	14	51
KLF14	KLF14_7	AGGGCTCCTGGGAGAACTCG	25	101	23	39
EVX2	EVX2_2	AGGGCTGCACAGCCCTACGG	11	4	40	4
TBR1	TBR1_3	AGGGCTGCCGATGGAGAAGG	8	53	46	19
HNF1B	HNF1B_2	AGGGCTGCTAAAATGATCAA	1	0	4	0
IRF5	IRF5_2	AGGGCTTCAGCCGCACGCGG	42	55	96	7
SON	SON_3	AGGGCTTCCAGCACCATCCA	17	22	72	8
PPARG	PPARG_2	AGGGCTTGATATCAAAGGAG	18	8	51	4
ZBTB9	ZBTB9_3	AGGGCTTTCAGTAGAAGCAG	9	3	0	1
KLF10	KLF10_3	AGGGGAAAACCCAGGAGCAG	27	3	28	0
TLX3	TLX3_1	AGGGGAAATTGAGACCGCCA	0	0	0	0
TP73	TP73_3	AGGGGAACTCACCGTCCAGG	2	5	6	1
ZNF79	ZNF79_6	AGGGGATACCAGGAAAGTCC	4	49	81	20
RAX2	RAX2_5	AGGGGCCGGCAACCGAGGGT	11	13	6	7
NR1I2	NR1I2_1	AGGGGCTGACAGAGGAGCAG	0	20	12	5
KIN	KIN_3	AGGGGCTGCAGAAGCTACGC	3	0	12	0
MTF2	MTF2_5	AGGGGTGGTGCACTTAAGAA	4	1	11	0
KLF17	KLF17_5	AGGGTAGCCAGGCCCTTCGG	16	11	23	9
MYC	MYC_2	AGGGTAGGGGAAGACCACCG	0	0	0	0
DLX6	DLX6_2	AGGGTAGTGCGCGCCTGCCA	109	85	251	28
FOSL2	FOSL2_7	AGGGTATGGGTTGGACATGG	6	17	2	13
MECOM	MECOM_5	AGGGTCCATAAAGAAAGGAG	55	68	108	24
ASCL4	ASCL4_3	AGGGTCCCCGGAACGCCCAG	84	99	218	30
IKZF4	IKZF4_3	AGGGTCTCACCGGCAAGGGA	58	37	166	6
TPRX1	TPRX1_1	AGGGTCTCAGCCCCAAGAGG	2	0	3	0
KLF8	KLF8_4	AGGGTCTGGGGAGAAGACTG	10	1	0	3
ZNF157	ZNF157_3	AGGGTGAACATGCCAGCTAA	14	34	33	4
ZFP69	ZFP69_5	AGGGTGATCAGGAGCTGCTG	21	16	35	7
ZKSCAN7	ZKSCAN7_4	AGGGTGATGCAGCTGCACCC	32	24	48	0
JDP2	JDP2_2	AGGGTGCAATCATGGCCCCG	21	29	40	9
MYCL	MYCL_5	AGGGTGCACCGGAGACGAAG	0	1	0	0
MLXIPL	MLXIPL_2	AGGGTGCTGGATACAAGTGG	23	23	77	15
LYL1	LYL1_3	AGGGTGGAGAGTTGCAGCAG	1	1	5	1
ZSCAN20	ZSCAN20_2	AGGGTGGCGTGCCTGCACCC	10	28	31	12
ZNF76	ZNF76_4	AGGGTGGTGAATGTAGGCAG	52	70	153	17
CPXCR1	CPXCR1_2	AGGGTGTCAGAATACCATGT	9	25	21	11
RAG1	RAG1_6	AGGGTTCATGGTAAACCCAG	8	0	0	0
MYRFL	MYRFL_3	AGGGTTGGGTAGCATGCACC	74	54	206	12
ZNF202	ZNF202_1	AGGGTTTGCAGAAACAACCC	22	127	47	30
CARF	CARF_5	AGGGTTTGCAGTTACAACCA	10	237	40	63
ZNF33B	ZNF33B_3	AGGTAGATCAGAAGTTCCAG	10	39	76	9
DACH2	DACH2_1	AGGTATAACAGCTGCAGCGA	9	5	11	0
ZNF768	ZNF768_6	AGGTATGAACCCCAAAGCCC	0	15	0	4
KLF5	KLF5_5	AGGTCCTCTGGAGGCAGCCG	18	33	77	6
RARA	RARA_7	AGGTCTACGTGCGGAAGCGG	16	17	25	4
PHF21A	PHF21A_2	AGGTCTCTGGCCCACCACAG	21	7	51	3
ZNF665	ZNF665_7	AGGTCTTCAGTCAAAACTCA	32	48	61	21
FOXL1	FOXL1_5	AGGTGCCCCGCGAGAAAGGG	17	11	24	2
ZNF273	ZNF273_5	AGGTGGACCTCTAGGAGCAG	0	0	0	0
ZFP64	ZFP64_7	AGGTGGCACAACGGTGCTGG	0	0	0	0
NEUROG3	NEUROG3_2	AGGTGGGCAGGACACCGCGC	21	54	67	17
E4F1	E4F1_2	AGGTGGTGGGCACATCAAAG	19	21	45	16
NR2F6	NR2F6_5	AGGTGTAGCTGAGGTTGCGG	0	0	0	0
SOHLH1	SOHLH1_3	AGGTGTGCCAGACCCTGGGA	26	18	112	4
CHAMP1	CHAMP1_3	AGGTTCAGGAGAAGAAACAG	0	8	7	1
ZFPM1	ZFPM1_7	AGGTTCCCTCGGAGACATGG	7	9	9	2
SIM1	SIM1_1	AGGTTCCTGGCGAAACACGG	7	19	21	7
GLYR1	GLYR1_5	AGGTTGAGACGACTTCAGCG	32	19	30	2
ZNF687	ZNF687_1	AGGTTGCACCATCACCACCG	16	60	63	25
OSR1	OSR1_4	AGGTTGGCAAAATCAAAGCG	18	37	48	18
LHX6	LHX6_1	AGGTTGGGTACCGTTCTCGG	134	165	351	41
ZNF547	ZNF547_6	AGGTTGTTGCCATGGAGCTG	69	53	112	13
ZNF134	ZNF134_6	AGGTTGTTGGCATGAAGTGA	31	128	111	32
ZNF772	ZNF772_1	AGGTTGTTGGCATGGAATGG	27	9	66	0
ZNF419	ZNF419_5	AGGTTGTTGGCATGGAGCCG	20	3	57	3
SNAPC4	SNAPC4_3	AGGTTTCTGGGTCTTCAGGG	45	39	112	8
TRPS1	TRPS1_5	AGGTTTTGCAACCTCAGAGG	4	18	44	6
ZNF408	ZNF408_5	AGTAAAGCCACGGCAGGAGG	24	26	53	0
CAMTA2	CAMTA2_2	AGTAAGCCCAGACTTCCCCG	10	53	57	9
NCOA1	NCOA1_6	AGTAATTCTAGCAACAGCCA	50	49	265	26
TGIF2LX	TGIF2LX_5	AGTACAAAGGGCTGCCGAGC	32	72	86	36
ZNF800	ZNF800_3	AGTACCGGTTACAGATACAG	38	22	105	7
ZNF182	ZNF182_4	AGTACCTGAACCCACCACAG	21	30	77	12
POU1F1	POU1F1_2	AGTACCTGTAGACATCACAT	65	92	173	37
ZNF493	ZNF493_1	AGTACGGTAGTCAAACCCCC	32	108	73	16
GSX1	GSX1_1	AGTACTGCGAGCCGAAGGGT	0	0	0	1
NR2F6	NR2F6_7	AGTACTGGCACTGGTTCCGG	8	39	22	19
ZNF157	ZNF157_1	AGTACTTACCTGAGTAACCA	29	2	39	1
POU4F2	POU4F2_7	AGTACTTGGGCTCCACGTGC	25	13	81	3
TOPORS	TOPORS_6	AGTAGAAACAAGGACAGGGA	4	7	3	5
CEBPZ	CEBPZ_4	AGTAGAAGATCCGGACGAGG	24	19	72	7
MYSM1	MYSM1_4	AGTAGACATCACAGATGAGG	23	79	76	24
NACC2	NACC2_5	AGTAGAGCTTGGGATGGCAG	19	35	76	9
ZNF442	ZNF442_5	AGTAGCCTTTGAGGATGTGG	19	34	47	14
ZNF579	ZNF579_4	AGTAGGGGAAACGGAAGAGG	8	10	24	5
FOXD4L1	FOXD4L1_4	AGTAGGTGCCCTTGCCTGGG	2	0	4	0
ZNF471	ZNF471_2	AGTAGTAAAAGTCATGCCCC	15	15	57	13
NRF1	NRF1_1	AGTAGTATATTCATCTAACG	0	0	3	0
ZNF250	ZNF250_6	AGTAGTCACTCCACAGGCCC	3	11	3	1
CEBPG	CEBPG_1	AGTATCGGCAACGCCGAGAG	14	29	56	12
ZNF160	ZNF160_7	AGTATGGATTGCCTGATGGG	27	18	70	7
NCOA3	NCOA3_1	AGTATTGCCAGAAGATGCCA	4	52	29	16
NR2F1	NR2F1_2	AGTATTGGCACTGGTTGCGG	27	106	140	17
CGGBP1	CGGBP1_4	AGTCAAAGACTCATACCAAG	103	19	260	6
ZNF639	ZNF639_3	AGTCAACCAGCAAACCCAAG	20	102	44	38
ZNF302	ZNF302_6	AGTCAATCCTCAGTCGCCAC	11	75	90	10
MBD1	MBD1_7	AGTCACAGCCTCCCTTGCGG	64	158	185	49
ZNF84	ZNF84_1	AGTCACATCTCATATCGCAT	8	14	30	6
THRB	THRB_1	AGTCACGCGAAATCAGTGCC	47	40	78	3
E2F1	E2F1_4	AGTCCAAGAACCACATCCAG	0	14	6	3
HOXD9	HOXD9_6	AGTCCACGTAGTAGTTGCTG	1	2	16	0
ATF4	ATF4_1	AGTCCCTCCAACAACAGCAA	34	32	94	6
KLF16	KLF16_7	AGTCCGGGAAGGGACAGCGG	10	13	14	1
TBX21	TBX21_6	AGTCCGGGTGGACGTACAGG	24	8	21	3
ZC3H8	ZC3H8_4	AGTCCGTGGCCGTTTTGCCG	104	158	262	58
ZNF224	ZNF224_5	AGTCCTACCCACCTTGAACG	15	38	63	10
ZNF223	ZNF223_6	AGTCCTACTTACCTTGGACA	12	33	50	4
ZNF35	ZNF35_6	AGTCCTGAAAGCAACTCAGG	37	64	114	21
ZNF275	ZNF275_1	AGTCCTGAATTCAGACAGCA	54	44	112	10
PAX4	PAX4_2	AGTCCTGCGGGCATTACAGG	4	20	11	2
FAM170A	FAM170A_7	AGTCCTTAGAAAAGCAGCCA	23	15	87	1
HINFP	HINFP_4	AGTCGGCAAGGACAACCCGG	58	15	106	1
ZNF446	ZNF446_6	AGTCTCAGGCTCCTCAAGGG	4	3	28	6
MXD3	MXD3_6	AGTCTGAGCGCTCAGAGGAG	1	2	16	2
ZKSCAN4	ZKSCAN4_6	AGTCTGCAGAAGACCAGACG	48	16	125	3
ZNF30	ZNF30_4	AGTCTGGACTCTTCCCAGAG	17	10	18	3
ZNF579	ZNF579_1	AGTCTGGGCACACGAAAGGG	1	1	8	1
TBX5	TBX5_2	AGTCTGGGTGCACGTACAGG	6	13	22	4
SP140L	SP140L_7	AGTCTGTATACACTTTGCCA	42	56	114	16
ZSCAN23	ZSCAN23_7	AGTCTTTGAAGAGCCTCCCG	11	18	31	6
ZNF507	ZNF507_6	AGTGAACTGAGTATCCACAA	58	115	112	12
ATF4	ATF4_7	AGTGAAGTGGATATCACTGA	0	5	9	0
GATAD2A	GATAD2A_4	AGTGAATGGGCTGACCACGG	5	8	23	1
ST18	ST18_2	AGTGACAGGACAGAGGACGA	24	19	18	0
NFIC	NFIC_6	AGTGACGCTGAACACGCCGG	8	8	38	5
ATF3	ATF3_4	AGTGACTGATTCCAGCGCAG	41	14	117	4
ALX1	ALX1_7	AGTGACTTTTACATGGGCGC	23	5	35	1
ZFX	ZFX_6	AGTGAGCCTGAGAATGATCA	28	50	100	17
HIC2	HIC2_6	AGTGAGGTGGGGACCTGGGG	0	0	0	0
IKZF3	IKZF3_3	AGTGATCAACAAGGAAGGGG	17	4	79	12
FOXN3	FOXN3_4	AGTGATCCAAAATGGAGCGC	14	17	50	7
TGIF2	TGIF2_5	AGTGATCTAGGTGAGGACGA	87	44	93	18
ZNF296	ZNF296_2	AGTGATGGCCTCCAACGGGA	1	0	1	0
DMRT1	DMRT1_1	AGTGCAACCTGATCGCCGAG	4	5	11	3
SREBF2	SREBF2_1	AGTGCAACGGTCATTCACCC	25	52	71	19
UBP1	UBP1_6	AGTGCAAGCGAGAATGGCAG	27	5	52	2
GLI1	GLI1_7	AGTGCAGCCAATACAGACAG	48	14	89	8
ZNF691	ZNF691_2	AGTGCCAGGAGAGCTTTCGG	13	18	9	7
ZNF75A	ZNF75A_7	AGTGCCGGAAAATCTCCTAC	22	54	74	17
ZNF540	ZNF540_2	AGTGCCTGGACACTACCCAG	1	0	0	0
ZNF138	ZNF138_3	AGTGCCTGGACACTGCACAG	5	55	17	21
ZNF677	ZNF677_3	AGTGCCTGGACCCTGCCCAG	8	15	23	2
ZNF790	ZNF790_3	AGTGCCTGGACCTGGAACAG	4	14	1	9
ZNF546	ZNF546_5	AGTGCCTGGACGCTGTGCAG	4	1	0	0
ZNF217	ZNF217_1	AGTGCGAACAGAACCTCCCA	28	20	86	5
ESRRB	ESRRB_1	AGTGCGAGATCACCAAACGG	73	33	193	13
NKX2-3	NKX2-3_7	AGTGCGCACCATGGAAGTGC	22	59	55	15
HIC2	HIC2_7	AGTGCGCAGAGCGGGAGCGA	12	28	13	9
RBCK1	RBCK1_1	AGTGCGCCCTGATATGACAG	20	0	51	0
SCML4	SCML4_3	AGTGCGGGGACCACCAGCGG	46	68	164	29
SPDEF	SPDEF_5	AGTGCTCAAGGACATCGAGA	35	46	126	16
PURA	PURA_7	AGTGCTCGATGAAGTCGCCC	23	24	84	14
MTF2	MTF2_3	AGTGCTGCAAATGTAAGCAG	34	44	66	9
PAX5	PAX5_3	AGTGCTGCCTCTCAAACACG	56	23	164	8
HOXC13	HOXC13_1	AGTGCTGGTAGCCTTCGACG	41	29	113	21
FOXP2	FOXP2_3	AGTGCTTTACTAACCTGCAG	10	19	6	8
CARF	CARF_4	AGTGGAAACAAATCAGACCA	18	20	6	7
ZNF534	ZNF534_4	AGTGGAAATGCCTGGACCCT	14	15	26	5
ZNF785	ZNF785_5	AGTGGAGGCGTGGAGCCCGG	0	11	0	1
ZFX	ZFX_5	AGTGGATGGCACTTGCCCTG	3	14	16	0
ZNF177	ZNF177_7	AGTGGCAGTGGACTTTTCCC	3	3	0	0
ZBED3	ZBED3_7	AGTGGCCACACCCCTACAGG	19	47	44	32
ZNF414	ZNF414_5	AGTGGCCAGCATGTCTGGGA	12	7	6	2
PAX2	PAX2_7	AGTGGCGACGCCCAAAGTGG	15	36	46	15
ARNTL2	ARNTL2_3	AGTGGCTCCTGCGATGGCGG	57	193	236	41
PAX4	PAX4_1	AGTGGCTCTGAGACTCCCCG	0	0	0	0
ZFP28	ZFP28_6	AGTGGCTGAACCCCATTCAG	7	72	22	15
ZNF202	ZNF202_3	AGTGGCTGAGACCAGAGAGG	0	0	0	0
THAP6	THAP6_7	AGTGGCTGGAACGGTTTTGA	11	15	37	5
ZNF513	ZNF513_4	AGTGGGACACGAAGGTGCAG	34	22	59	2
ZNF425	ZNF425_2	AGTGGGAGATCCTGGAGAAG	0	0	0	0
PRDM10	PRDM10_6	AGTGGGGACAGCAGACGGGA	6	2	14	1
ZFP42	ZFP42_3	AGTGGGGCTAAGCCCAGGCA	14	18	21	6
CAMTA2	CAMTA2_6	AGTGGGGCTATCAGTGGAGG	1	13	14	9
ZNF469	ZNF469_6	AGTGGGGTGGACACCAGCCC	11	30	11	7
PRDM1	PRDM1_5	AGTGGGGTTGAGCATGGGGT	0	0	10	0
ZNF229	ZNF229_5	AGTGGGTGAGAGGAATCCTC	46	23	91	12
ZNF281	ZNF281_3	AGTGGGTTCCTGAGTGGCGG	25	23	68	6
ZNF692	ZNF692_2	AGTGGTGCCTCCTCAAGGAG	28	16	95	12
NFKB1	NFKB1_4	AGTGGTGCTGGAGCTGGAGG	1	15	2	2
ZBTB33	ZBTB33_7	AGTGGTTCTTGAAGAAGTGT	15	2	30	2
ZNF576	ZNF576_4	AGTGGTTGCAACCGGCAGGG	26	40	58	17
ZNF582	ZNF582_2	AGTGGTTGGCACCTGCTCAG	76	114	297	29
TERB1/CCDC79	TERB1/CCDC79_5	AGTGGTTGTGACGAAGACTG	17	29	21	10
ZNF441	ZNF441_6	AGTGTAACAGGAACAACTGA	10	5	10	2
PAX3	PAX3_7	AGTGTCCACTCCCCTCGGCC	110	227	196	77
SPZ1	SPZ1_5	AGTGTCGGCTAAGCATGAGC	18	141	88	67
ZNF7	ZNF7_5	AGTGTCTGGACCCTGGCCAG	0	4	2	0
PRDM4	PRDM4_5	AGTGTGAATGGAGTCACTGA	10	5	20	6
ZNF791	ZNF791_6	AGTGTGACGAAGAAGACTGC	36	25	84	7
ZNF239	ZNF239_2	AGTGTGATGACTCTTCAAAG	7	20	13	19
FOSL2	FOSL2_3	AGTGTGCAAGATTAGCCCCG	18	5	43	4
MBD3	MBD3_4	AGTGTGCAGGGCGCTGGCGA	39	31	68	5
ZNF761	ZNF761_4	AGTGTGGAAAGACCTTTAGC	11	56	52	26
ZFP3	ZFP3_4	AGTGTGGAAAGGCTTTCAGG	17	47	68	15
ZNF766	ZNF766_4	AGTGTGGATTAACAGATGGG	1	13	23	7
ZNF765	ZNF765_7	AGTGTGGCAAGACCTTCAGC	20	4	39	2
ZNF761	ZNF761_1	AGTGTGGCAAGACCTTCAGT	10	0	16	0
ZNF628	ZNF628_2	AGTGTGGCAAGTCATTCCGG	17	20	14	6
HOXA11	HOXA11_2	AGTGTGGCCGGAAGACGACT	31	115	66	48
CIC	CIC_4	AGTGTGGCTGGGCTCAGGGG	6	4	22	2
ZSCAN26	ZSCAN26_3	AGTGTGGGAAAGCCTTTCAG	4	6	24	0
ZNF226	ZNF226_7	AGTGTGGGAAGAGCTTCAGG	0	0	0	0
NPAS2	NPAS2_7	AGTGTGTTAAAGTGCTGCCG	27	55	54	11
CENPBD1	CENPBD1_1	AGTGTTACGACGATTTGAAG	9	24	12	6
ZSCAN9	ZSCAN9_6	AGTGTTCCCTCACCCAGCCC	26	10	129	5
NFE2L2	NFE2L2_7	AGTTACCTGTAACTCAGGAA	26	4	76	5
ZNF490	ZNF490_7	AGTTCACAGCCACATCCTCA	0	0	0	0
ZNF200	ZNF200_3	AGTTCCGCCAGACTCCAAGC	37	105	111	36
ZNF804B	ZNF804B_2	AGTTCGAGACATCTCAGCAA	12	49	47	16
HOXC10	HOXC10_3	AGTTCGGAGTTACATTGCGA	5	0	8	0
HOXC12	HOXC12_2	AGTTCGTCCCTGCTCAACGA	1	0	0	0
ZNF565	ZNF565_4	AGTTCTAAAAGCCATGGCCC	23	32	62	17
ZNF230	ZNF230_1	AGTTCTCAAGCATCACGTCT	49	73	150	12
ZNF615	ZNF615_4	AGTTCTCCAACATCACGTCC	0	22	22	3
ZNF81	ZNF81_6	AGTTCTCCAACATTACATCC	17	32	31	6
ZNF788	ZNF788_2	AGTTCTGAGGCGCATCCAAA	19	19	65	5
BRF2	BRF2_5	AGTTCTGCCAAGCACAGAGA	32	24	82	10
ZSCAN32	ZSCAN32_1	AGTTGAGTTACCGCAAAGTG	24	94	49	72
CDC5L	CDC5L_2	AGTTGATGCCAACTCAGTGG	9	33	25	14
ZNF613	ZNF613_4	AGTTGGAACAAGGAGAGCCA	0	0	0	0
DACH1	DACH1_5	AGTTGGCCCAGAGGACGCCG	29	57	149	14
ZNF75D	ZNF75D_1	AGTTGGCTGATAGTCTCAAG	16	36	35	22
L3MBTL3	L3MBTL3_7	AGTTGGTACCATCCAAGTGG	9	19	9	21
NEUROD6	NEUROD6_1	AGTTGTCCAGAGCGTCGTTG	113	172	308	54
ZNF324	ZNF324_2	AGTTGTCTAGCATCACGCGG	5	14	21	0
ZNF572	ZNF572_1	AGTTTGAAAAGCCCTTTCAC	1	0	0	0
ZNF324B	ZNF324B_3	AGTTTTCCAGCATCACGTGG	17	73	43	18
ZNF470	ZNF470_5	ATAAAAGGAGGGATGAACAG	4	32	57	11
IRX5	IRX5_1	ATAAAATGACGTGGACGCCG	24	39	45	18
EN1	EN1_2	ATAACGTGTGCAGTACACCC	36	165	95	46
TERB1/CCDC79	TERB1/CCDC79_7	ATAATCTTGAAGAGCACTGG	7	49	13	6
ZFP64	ZFP64_5	ATACAAACTGGACCGTGCTG	30	173	70	61
AHR	AHR_7	ATACAACACAGCTTCTCCAG	65	88	184	24
ZNF580	ZNF580_3	ATACACGGTGCAGCTGGAGG	26	21	88	18
ZNF277	ZNF277_1	ATACACTTAAAGATCACATG	30	43	75	13
ZNF25	ZNF25_4	ATACAGAGTCCTCTGAGCAG	6	1	3	0
NR4A3	NR4A3_6	ATACAGCTCGGAATACACCA	7	40	4	10
ZNF441	ZNF441_7	ATACATGAAAGACCTCAGCA	23	43	67	31
L3MBTL3	L3MBTL3_1	ATACCAACTCGAAAGCCCGA	41	57	79	23
ZNF346	ZNF346_7	ATACCTAGCAATCCATGGAA	1	0	0	0
FOXD4L4	FOXD4L4_1	ATACCTCAGCAGCGCCGACG	3	0	0	1
FOXD4L6	FOXD4L6_2	ATACCTCAGCAGGGCCGACG	32	64	99	11
THAP9	THAP9_4	ATACGCACTGGTGGAAGGAG	32	40	46	12
MSANTD1	MSANTD1_5	ATACGGGAAGTACAGAGGGG	46	45	87	34
PLAGL2	PLAGL2_2	ATACTCGTAAGGATGTACGG	15	10	56	8
ZNF479	ZNF479_2	ATACTGGAGAGAAACCCTGC	39	53	95	22
HOXC6	HOXC6_6	ATACTGGCTTTCTGGTCCTG	4	30	18	10
SIX3	SIX3_1	ATACTTCTGGCGAGTAGCGG	100	51	199	24
ARID3A	ARID3A_1	ATAGACAGCAACCGACGGGA	100	15	189	19
ARID3C	ARID3C_4	ATAGACAGCAATCGGCGCGA	14	74	51	20
SETDB2	SETDB2_1	ATAGAGAAGAAACTCCACCA	8	13	11	11
ZNF311	ZNF311_4	ATAGAGATGCCTTTGAGCGT	25	64	57	36
GRHL1	GRHL1_3	ATAGAGCAGGCCCAGCGCAG	89	90	219	20
CPXCR1	CPXCR1_5	ATAGATCAAGATCCCACTCA	7	4	4	3
FOXD4L6	FOXD4L6_4	ATAGCAGCAGCATCAGGAGG	9	21	45	27
ARNTL2	ARNTL2_1	ATAGCCAAACTGAAAAGCGG	3	2	15	0
HOXB7	HOXB7_2	ATAGCCGGCCGCGTAGACGC	23	29	8	13
FOXM1	FOXM1_1	ATAGCCTATCCAACATCCAG	0	1	0	0
IRX1	IRX1_6	ATAGCGACCGGCGGCTGCGG	38	40	57	7
ZNF841	ZNF841_3	ATAGCGAGGAACCCAAACTG	0	4	0	1
HOXC4	HOXC4_7	ATAGCTGCACCAGTCTCCAG	5	29	7	15
ZNF563	ZNF563_2	ATAGGAACTGGAATCAGGCA	17	6	17	1
KLF5	KLF5_6	ATAGGAACTGGAGGAAGCTG	0	0	0	2
ZNF44	ZNF44_7	ATAGGAACTGTAAACAGGGA	5	17	31	6
MTERF4	MTERF4_1	ATAGGCAGTTTCAATAACTG	43	7	90	7
ZNF668	ZNF668_7	ATAGGGCCTAGGCTTGGCCG	6	7	10	2
NR4A1	NR4A1_5	ATAGTAGTCAGAGCCACTGG	1	0	0	0
THRB	THRB_5	ATAGTCAATGCCCCAGAAGG	13	14	20	4
NR6A1	NR6A1_7	ATAGTGACCACAGTTCCCCT	63	56	206	12
MBD6	MBD6_3	ATAGTGGCTGAAGACACTGG	28	5	33	1
ZNF611	ZNF611_6	ATATAAGGGATGAGCAGTGA	2	7	8	2
ZNF844	ZNF844_2	ATATATGCTGAGACAAGGGC	45	80	143	23
ZNF585A	ZNF585A_2	ATATCAAGTTCCTGAAGCAG	9	31	14	8
ZFP90	ZFP90_4	ATATCAAGTTTCCAAGCCAG	26	46	102	6
ZNF705G	ZNF705G_1	ATATCATGTGTGTTTTCTTA	8	34	20	21
ZNF589	ZNF589_5	ATATCTAGGCTTCTCTTCCC	3	10	0	0
ZFP69B	ZFP69B_7	ATATCTCTCTCCATCAGCCA	20	9	70	2
NFYB	NFYB_2	ATATCTTCCAATAGCAAACG	2	0	7	0
OLIG3	OLIG3_3	ATATGATGCAGAAGATGCCC	8	8	32	3
ZNF716	ZNF716_4	ATATGGAAAATGTGGACAGG	65	131	176	49
ZNF670	ZNF670_3	ATATGGAGAAACCTTCAGCC	10	11	25	4
GTF2I	GTF2I_7	ATATGGTACAGGTACCACTG	7	6	59	0
ZEB2	ZEB2_3	ATATGGTGACACACAAGCCA	2	332	16	106
MTF2	MTF2_2	ATATGTGACAAGTGTGGCCA	35	28	107	9
CENPA	CENPA_1	ATATGTGTTAAATTCACTCG	24	43	71	17
CREBL2	CREBL2_1	ATATGTTTCAGTACAAGCAG	3	0	0	1
ZNF658	ZNF658_2	ATATTGCATTACTAAACCTA	27	70	66	26
ZNF605	ZNF605_7	ATCAAACCTGGCAGAACCCA	27	19	29	11
PAX2	PAX2_6	ATCAAGCCGGGTGTGATCGG	33	18	109	8
SNAPC5	SNAPC5_4	ATCAATCAACCAAACAACCC	4	2	19	0
ETV4	ETV4_1	ATCAATGTACCTCCACACAG	8	10	5	2
SP1	SP1_6	ATCACAAATCGAGGAAGTGG	4	4	13	5
ZNF23	ZNF23_7	ATCACAGCAGGTTTGAGAAG	30	22	19	12
ARNT	ARNT_3	ATCACAGTGAAATTGAACGG	0	3	21	0
ZNF74	ZNF74_7	ATCACATCTGGCTTGTGCAG	152	89	283	41
POU3F2	POU3F2_1	ATCACCGCGCTGTCCCACGG	14	14	53	5
ZNF821	ZNF821_5	ATCAGAGGAAGATGGAGGGG	0	0	0	0
ZNF77	ZNF77_4	ATCAGCACCAAATCCCACAG	56	56	227	17
ZMAT1	ZMAT1_4	ATCAGGATTTCAACCAGAGA	37	74	170	23
ZNF821	ZNF821_2	ATCAGGGAAACATGTCCCGT	4	6	34	8
ZNF428	ZNF428_1	ATCATATTCAGGATCGTCAG	29	45	46	6
DR1	DR1_6	ATCATCATCGTTGCCAGACG	19	1	92	4
NFYC	NFYC_2	ATCATCGCACAGCCTCAGCA	9	6	43	0
EHF	EHF_7	ATCATGATTCTGGAAGGAGG	47	65	148	12
PURA	PURA_5	ATCATGGCGGACCGAGACAG	54	47	102	11
ZNF85	ZNF85_3	ATCATGGTGGCCAAACCCAC	41	83	89	28
MESP1	MESP1_2	ATCCAGGACTCGGAGAGCGG	35	148	133	48
FOXI2	FOXI2_7	ATCCCCTGGCTCATAGCCCG	7	21	10	6
ZNF774	ZNF774_2	ATCCCGAGGGAAAGCCACAC	11	17	24	1
ZNF654	ZNF654_3	ATCCGGACACAACCAAGAGC	3	1	0	2
ZNF391	ZNF391_7	ATCCTCTTTTGAGAACACAG	7	0	8	1
ZNF776	ZNF776_4	ATCGTACAGAAGCAATGCCA	11	10	3	1
ZNF721	ZNF721_6	ATCGTGACAGAGCCTTTGGA	1	21	13	0
FLI1	FLI1_6	ATCGTGAGGATTGGTCGGTG	34	41	111	20
ZNF471	ZNF471_1	ATCTCACTCGTCATCTCCCA	2	8	19	0
ZNF784	ZNF784_1	ATCTCGATGAGGTCACTCGG	23	56	111	18
HLX	HLX_1	ATCTCTAGATCCCATTAACG	2	11	6	3
NFYB	NFYB_1	ATCTCTGCAGACTATATTGG	2	2	3	2
ZNF705B	ZNF705B_1	ATCTCTGTACAGCTTTCTTT	59	203	189	40
ZNF233	ZNF233_6	ATCTTGGTACAGCTTTCTCT	9	24	18	3
TCF12	TCF12_6	ATGAAATATCCAGGAACCAG	9	53	16	8
ZNF571	ZNF571_6	ATGAAATGGAATCACTCCAG	14	29	42	10
[truncated: 9,364 more rows]

## Sheet: Raw counts related to Fig 3-2
gene	gRNAID	Gene	count_hTF-top-rep1_S9_L001_R1_001	count_hTF-btm-rep1_S10_L001_R1_001	count_hTF-top-rep2_S11_L001_R1_001	count_hTF-btm-rep2_S12_L001_R1_001
ZNF506	ZNF506_4	AAAAACCTTTAACTATGAAG	24	17	4	4
AC008770.3/ZNF700	AC008770.3/ZNF700_1	AAAACCCCAGAAGAAGCTTC	145	92	36	24
STAT3	STAT3_6	AAAACCCTCAAGAGTCAAGG	88	68	26	15
TLX3	TLX3_7	AAAACCGGAGGACCAAGTGG	56	37	18	7
ZNF101	ZNF101_5	AAAACCTGGGGATTAAGCTA	46	40	10	7
MSANTD4	MSANTD4_2	AAAACGACGACTGGATATCG	56	59	10	12
GTF2IRD2B	GTF2IRD2B_4	AAAACGCAAGATAGACCAGG	82	39	24	24
IRF9	IRF9_1	AAAACTCCGGAACTGGGTGG	93	55	46	19
TBX18	TBX18_2	AAAACTGGGCGCCGAAGAGG	68	47	28	24
FOSB	FOSB_5	AAAACTTACCTGGGAGGCGG	117	59	35	10
PRRX1	PRRX1_5	AAAAGAAGAGAAAGCAGCGA	23	27	7	4
ZNF331	ZNF331_2	AAAAGACCTGCTACTAGAGA	128	47	31	12
ZNF471	ZNF471_3	AAAAGACGAGCCATCACTGA	182	74	41	27
TIGD1	TIGD1_1	AAAAGAGTACGACTCACCGA	83	31	25	13
ZNF597	ZNF597_4	AAAAGAGTCTTTGGAGGATG	56	8	19	9
SHOX	SHOX_2	AAAAGCAAGGACGGTAACGG	100	106	39	10
ZNF552	ZNF552_7	AAAAGCCATTACAGCTGTGG	56	20	21	5
ZNF804A	ZNF804A_3	AAAAGCTCTGGAAGATCTGA	37	21	15	7
TP63	TP63_3	AAAAGCTGAGCACGTCACGG	261	110	87	31
ZNF92	ZNF92_7	AAAAGCTGAGGACCAGCTAA	49	30	15	7
ZNF732	ZNF732_6	AAAAGGAAGGTGCAGAAAGG	83	52	27	7
L3MBTL4	L3MBTL4_2	AAAAGGGTGGGCTGACACCG	87	73	34	17
ZNF350	ZNF350_7	AAAAGTCAGTTACCTGGGCC	70	66	23	22
LBX2	LBX2_2	AAAAGTGTCGAGGAGGGCGT	89	80	32	25
ZNF451	ZNF451_4	AAAAGTTCATTCCGAAGAGG	83	21	18	8
ZNF528	ZNF528_1	AAAATAGCAAACGATCCAGA	50	32	31	9
ZNF709	ZNF709_3	AAAATCAGGGGAGAAAGCTA	63	31	12	16
ZC3H8	ZC3H8_6	AAAATGAAGCGAAAATGGCC	67	37	16	9
ZNF805	ZNF805_7	AAAATGAGCCCCAAACATGA	127	66	38	19
ZNF460	ZNF460_1	AAAATGAGCCTTGAACACGA	75	52	20	13
ZNF728	ZNF728_4	AAAATGATCAGGTCTGGCTT	85	39	35	12
ZNF836	ZNF836_4	AAAATGCCAAACAGTGACGC	55	21	16	10
TCF7L2	TCF7L2_2	AAAATGCCGCAGCTGAACGG	58	46	13	13
HEYL	HEYL_6	AAAATGCTCCATGCCACTGG	144	30	32	18
HEY1	HEY1_4	AAAATGCTGCATACGGCAGG	112	55	33	21
ZBTB2	ZBTB2_2	AAAATGGATTTGGCCAACCA	41	52	20	7
SRY	SRY_5	AAAATGGCCATTCTTCCAGG	94	33	18	5
NEUROD6	NEUROD6_4	AAAATGGGTTGCCTAGAAGG	97	26	21	6
ZNF205	ZNF205_1	AAAATGTCTGCAGACGGCGG	97	65	39	11
ZNF286B	ZNF286B_5	AAAATTGGAGCTCTGGCTGA	34	59	21	9
SOX6	SOX6_1	AAAATTGGGATCATGAGCGG	76	38	11	9
ZBTB33	ZBTB33_4	AAACAAGGCCAATGAAGAGG	116	41	20	6
ZNF586	ZNF586_3	AAACACAGGAATGTTCGCAC	270	60	39	18
CASZ1	CASZ1_5	AAACAGACTCCATCACCACG	95	70	40	13
ZGLP1	ZGLP1_3	AAACAGCTGAACCCCTGCCG	92	93	15	20
REXO4	REXO4_1	AAACAGTTGGGTCAGAGCGA	126	33	45	19
ZNF674	ZNF674_6	AAACATCAGAGAAGTCACAC	55	67	28	12
ARNTL2	ARNTL2_4	AAACCACAGGAGCAATGCAC	93	78	37	19
ZNF92	ZNF92_6	AAACCCTGCAAACATGAATG	130	53	39	17
ELK3	ELK3_2	AAACCGACAAGCACGTCACC	180	86	52	16
BSX	BSX_3	AAACCGTGCGGGCTTTGCGG	98	55	28	24
ZNF823	ZNF823_1	AAACCTCCGAAGACACATGG	37	40	33	10
ZNF57	ZNF57_1	AAACCTTGCGAGTCCACATG	48	32	13	5
ZNF491	ZNF491_3	AAACGAAGTGGAACAAGTGA	26	30	11	7
TAL2	TAL2_7	AAACGGGAGTGGCTGCTCAG	145	42	34	9
ZNF280C	ZNF280C_7	AAACTCACTTTTGCTCCAGG	107	89	36	26
PHOX2B	PHOX2B_3	AAACTCTTCACGGACCACGG	54	32	17	10
ZNF615	ZNF615_6	AAACTGAGACAACTTGAGGA	50	24	27	18
ZBED9	ZBED9_1	AAACTGAGGATATCCGAAAG	70	44	15	16
CEBPZ	CEBPZ_7	AAACTGGAACAGTTGTCCAG	82	65	32	19
NR1D1	NR1D1_4	AAACTGGGAGAAGCCCACCA	42	24	8	8
TCF7L2	TCF7L2_4	AAACTTTCGGAGCGAGGCGG	54	40	14	7
ZNF727	ZNF727_4	AAAGAAAGACTACCAACGTG	87	52	27	18
RBPJ	RBPJ_2	AAAGAACAAATGGAACGCGA	58	70	5	16
SMAD9	SMAD9_5	AAAGAAGAAGAAGGGAGCCA	46	23	14	4
ZBED6	ZBED6_3	AAAGAAGTGCCACACAATGG	97	54	26	13
ZUFSP	ZUFSP_3	AAAGACAACACCCTACAGTG	187	113	53	32
ZFP62	ZFP62_1	AAAGACAGAACAGGAAGGTG	29	17	9	6
SP100	SP100_4	AAAGACATTTCCATTCCTCG	261	95	38	24
ZNF518A	ZNF518A_1	AAAGACTGTAAGCTGTGTAG	176	110	58	27
GCM2	GCM2_1	AAAGAGAATTCGAGAATCCG	79	33	20	2
PATZ1	PATZ1_4	AAAGAGCATTATATCGGCGC	21	29	4	16
SKOR1	SKOR1_4	AAAGAGCCTGGTCCAGGCAG	126	83	40	28
L3MBTL4	L3MBTL4_5	AAAGAGCGTTTGGATCAGGA	37	37	13	13
PHF20	PHF20_5	AAAGAGGCATGTCCAAACCA	98	33	42	15
ZIC1	ZIC1_5	AAAGAGGCTGTGCTGTGCGC	194	118	51	34
CREBZF	CREBZF_6	AAAGAGTCCCCGGAAGGCGG	197	98	59	22
ZNF136	ZNF136_1	AAAGATCACTACAAACACCG	63	54	20	15
BBX	BBX_3	AAAGCAAAAGAATCCGATGG	72	30	12	13
ZBTB21	ZBTB21_4	AAAGCACACAACACATTCCC	93	76	38	18
ZNF518B	ZNF518B_1	AAAGCACACCCTTCAACACG	104	69	16	16
TSHZ1	TSHZ1_6	AAAGCAGCCCGACTCTCCCG	91	74	48	12
ZNF865	ZNF865_7	AAAGCAGCGTCAAAGAGGGG	87	54	40	21
ZNF14	ZNF14_3	AAAGCAGTGGTGATAACTGA	52	44	18	26
MEIS1	MEIS1_6	AAAGCAGTTGGCACAAGACA	10	21	8	5
ZEB2	ZEB2_2	AAAGCATCTGGAGTTCCAGG	65	40	18	22
ZNF668	ZNF668_4	AAAGCCAGAGACAGAAGCTA	47	8	13	1
TTF1	TTF1_1	AAAGCCAGGACTCCTCCTGG	69	33	34	4
TMF1	TMF1_2	AAAGCCAGTTCGGAGGACTG	46	25	11	6
ZNF699	ZNF699_6	AAAGCCATGAGAGACATTTG	97	49	18	19
ZBTB43	ZBTB43_5	AAAGCCCAAGAACTGAGAGA	32	8	11	4
ZNF319	ZNF319_6	AAAGCCCTTCAAGCACCTGT	60	53	20	13
ZSCAN31	ZSCAN31_7	AAAGCCTTCAGTGCCAGCAA	56	60	19	20
ZNF189	ZNF189_5	AAAGCCTTTAGTAGAAGCTC	31	31	10	19
ZBTB24	ZBTB24_5	AAAGCGCCCTGGAGGCCCTG	70	44	35	15
NFIA	NFIA_5	AAAGCGCCTCAAGTCTGTGG	91	56	26	12
BHLHE40	BHLHE40_5	AAAGCGGAGCGAGGACAGCA	53	37	19	13
RUNX3	RUNX3_7	AAAGCGGTCAGGGAACGGCT	47	40	17	4
ZNF512	ZNF512_1	AAAGCTCAGGTGCATGCGTG	44	23	23	12
ZNF667	ZNF667_1	AAAGCTCCTACACGAAAGAG	44	26	10	8
NRF1	NRF1_2	AAAGCTGCAAGCCCATCTGG	48	40	15	8
STAT1	STAT1_6	AAAGCTGGTGAACCTGCTCC	98	47	35	14
ZNF45	ZNF45_6	AAAGCTGTGGATGATGAAGA	67	26	15	5
ZNF676	ZNF676_2	AAAGCTTGAGGACCAGGTGA	71	61	32	15
ZBTB7B	ZBTB7B_6	AAAGCTTTCCTGCAAACCAA	79	55	35	12
ZNF439	ZNF439_4	AAAGGAACCGGAACGAGTGA	162	37	35	17
ZNF709	ZNF709_5	AAAGGAACGTGAGCAACTGA	72	67	16	33
ZNF44	ZNF44_5	AAAGGAACTGAGAGAACTGA	142	120	48	27
ZNF844	ZNF844_7	AAAGGAACTGGAACGATTGA	100	49	21	7
ZNF266	ZNF266_7	AAAGGAACTGGAAGAACTGA	70	36	31	10
HOXD8	HOXD8_4	AAAGGAAGCCCAAGAGCTGG	125	74	43	19
ZNF844	ZNF844_3	AAAGGAATGGAACCATCTGA	87	71	19	15
ZNF433	ZNF433_6	AAAGGAATGGGAAGAGCTGA	103	67	17	14
AKAP8	AKAP8_6	AAAGGAGAAGAGACAGGACG	116	57	36	39
TFDP1	TFDP1_3	AAAGGAGAGAAGAATGGCAA	46	19	21	9
MYOD1	MYOD1_6	AAAGGAGCAGAGAGAGCCGT	86	47	38	26
BPTF	BPTF_1	AAAGGAGCAGAGCAAAACCG	63	41	39	15
ZNF175	ZNF175_5	AAAGGAGCCGCGTGTGGAGG	56	36	17	6
ZNF440	ZNF440_4	AAAGGAGGGGCGGTATCTGA	45	39	13	19
ZHX1	ZHX1_7	AAAGGATTCCAGGATTGCTT	113	83	31	29
RBPJL	RBPJL_6	AAAGGATTGGGAGGCACTGA	214	91	45	27
ZNF804B	ZNF804B_7	AAAGGCCCTGGAAGATGTAA	45	34	13	9
BARHL2	BARHL2_4	AAAGGCTGCAAACTTTGCGT	85	43	31	11
DMRTC2	DMRTC2_5	AAAGGGAACCACTCAGCCAC	91	40	15	13
YY2	YY2_5	AAAGGGAAGAAACTTCCTCC	177	162	53	26
MBD2	MBD2_3	AAAGGGACCGGCTCCCGCCG	98	58	23	18
ZBTB26	ZBTB26_5	AAAGGGCATAATTGTGGAGA	128	58	26	13
SKOR1	SKOR1_5	AAAGGGGAGACACGCCCCAG	69	39	20	10
PRDM9	PRDM9_1	AAAGGGTCATGCATACAAAG	93	33	33	21
ZNF682	ZNF682_2	AAAGGGTGAACACCAGTGAA	27	18	9	13
ZNF561	ZNF561_3	AAAGGTAGAAAGGATGGTGG	83	44	25	11
KLF7	KLF7_7	AAAGGTCTCTGAGATCCTCC	43	34	25	4
NFYB	NFYB_6	AAAGGTGCCATCAAGAGAAA	110	59	33	20
ZNF627	ZNF627_7	AAAGTAAGTGGATCGACTGA	51	55	29	15
THAP11	THAP11_1	AAAGTAGCGCGCAGACCCGC	136	68	47	25
SPDEF	SPDEF_3	AAAGTAGGAGAGGTAGAAGG	56	21	15	4
ZNF625	ZNF625_4	AAAGTAGGGGAGATCACTGA	134	50	40	7
HSF2	HSF2_2	AAAGTAGTACATATCGACTC	97	41	29	17
ZNF347	ZNF347_2	AAAGTCATCCTCACCCAGGG	141	94	51	24
KMT2A	KMT2A_6	AAAGTCCGGAAAGACAAGGA	35	60	4	5
ZNF488	ZNF488_1	AAAGTCGACCCCAACAAGCG	94	63	15	10
ZBTB18	ZBTB18_1	AAAGTCGAGAGTCTCTCCGA	165	122	36	32
ZNF180	ZNF180_4	AAAGTCGAGGGAGAAGACAC	17	24	14	6
IRF1	IRF1_6	AAAGTCTCCATAGACAGAGG	65	47	30	9
GBX1	GBX1_3	AAAGTCTCTGAGAAGTGCGG	159	116	48	21
ONECUT2	ONECUT2_6	AAAGTCTGGGCACTTTGCAC	48	39	16	4
ZNF562	ZNF562_7	AAAGTCTTCACCTTAACTCC	155	96	50	13
ZNF138	ZNF138_4	AAAGTGACACTGAGCAGATA	110	59	50	35
ZBED6	ZBED6_1	AAAGTGAGCGTGAAGACCGC	94	82	61	35
ZNF267	ZNF267_5	AAAGTGATATCGAGGAGACA	146	58	46	28
ZNF557	ZNF557_4	AAAGTGATGACAGAAGAGAG	96	25	26	16
NR3C1	NR3C1_2	AAAGTGATGGGAAATGACCT	195	128	91	51
ZSCAN16	ZSCAN16_3	AAAGTGCAGTCCTCACAGGA	45	48	30	11
ATF3	ATF3_3	AAAGTGCCGAAACAAGAAGA	24	27	23	6
ZNF138	ZNF138_5	AAAGTGCTGAAACAAATGGC	91	23	16	12
PGR	PGR_4	AAAGTGCTGTCAGGCTGGCA	82	45	28	28
MSX1	MSX1_2	AAAGTGGAGGACTCCGCCTT	74	91	34	25
HOXB5	HOXB5_4	AAAGTGGCTGGAGGAGGCCG	170	111	58	31
SMAD9	SMAD9_2	AAAGTGGGCAGAGAAGGCAG	99	42	23	15
NKX2-1	NKX2-1_2	AAAGTGGGCATGGAGGGCGG	56	63	45	13
KCMF1	KCMF1_3	AAAGTGGTGCAACAACAACA	67	79	20	23
PRDM14	PRDM14_5	AAAGTGTCAGGTCCACAACA	67	40	12	8
HOXA9	HOXA9_7	AAAGTGTGAGTGTCAAGCGT	24	315	8	115
ZBTB32	ZBTB32_6	AAAGTTCAGGAGCTGGGCAA	56	30	19	7
FOXD1	FOXD1_1	AAAGTTCTCGACACTGGACA	59	38	18	13
ZNF292	ZNF292_2	AAAGTTGACGACACCTCTCA	96	90	50	24
MEF2A	MEF2A_2	AAAGTTGACTGAAAATGGGG	39	27	14	9
ATOH1	ATOH1_5	AAAGTTGCAGGTGGCTGCGG	155	76	52	28
GPBP1L1	GPBP1L1_4	AAAGTTGCAGTTTGAAGAGG	58	34	31	12
GPBP1	GPBP1_5	AAAGTTGCCAACGCCAAATG	28	19	6	3
ZNF91	ZNF91_2	AAAGTTTTCCTTACCCAGGA	156	106	46	29
TFCP2	TFCP2_1	AAATACAGTGGAGTTCCTGT	82	73	28	20
TMF1	TMF1_5	AAATAGGCTGTGTAAACTGG	24	29	10	6
FOXB2	FOXB2_2	AAATAGTGTACCATGTGCGG	102	76	37	15
ZNF566	ZNF566_7	AAATATCAGAGCCATGGCTC	23	38	10	9
ARID5B	ARID5B_4	AAATATGTTTCCACTGACGG	61	79	13	21
ZHX3	ZHX3_7	AAATCAACCTGAAGAACCTG	140	76	31	17
OTX2	OTX2_3	AAATCAACTTGCCCGAGTCG	132	90	31	27
ZNF567	ZNF567_5	AAATCATTCCTTCAAAGGGG	78	59	27	16
ZIC5	ZIC5_2	AAATCCGCTAATCTCAGCGC	40	27	9	2
SP110	SP110_5	AAATGACCCAGAAGAGCCCC	148	114	34	10
ZNF426	ZNF426_7	AAATGCGACTTGAAACCCAG	55	34	33	13
JRKL	JRKL_4	AAATGGAGATGAGACTGCGG	86	58	31	11
CREB5	CREB5_3	AAATGGGAACATGAACACCA	115	97	53	33
ZNF823	ZNF823_5	AAATGGGAGGACCAGAACAT	114	55	40	14
ZBTB26	ZBTB26_7	AAATGTACAAGACCTCACAG	41	29	10	9
ZNF560	ZNF560_1	AAATTATCTTGCCAAAGGGC	48	19	19	4
KLF12	KLF12_5	AAATTCATGGGACTTGAAGG	47	34	4	12
POU4F3	POU4F3_5	AAATTCTCCAGTCTGCACTC	305	150	87	56
CREB3	CREB3_5	AAATTCTGAAACGTGTGCGG	66	39	24	10
ZNF181	ZNF181_5	AAATTGCAGAGTAATGCCTC	97	47	30	17
NKX2-3	NKX2-3_1	AAATTGCGTCCCCTCAGCGG	363	214	120	58
E2F6	E2F6_6	AACAAAAGGTCTGAAGGTGT	85	19	7	8
LMX1A	LMX1A_6	AACAAACTCATTGGGAGCGA	134	72	29	17
ZNF574	ZNF574_7	AACAACAGTGGAGAAGCAGG	49	21	19	3
ZFP1	ZFP1_2	AACAACTGGACCCCTCTCAG	242	128	73	32
NKX3-2	NKX3-2_1	AACAAGAAAGAGGAGCGCGG	146	95	54	25
UBP1	UBP1_7	AACAAGAATGTGAATACCGG	99	51	36	15
ARHGAP35	ARHGAP35_6	AACAAGAGAGGAGACACCAG	15	8	2	1
TFAP2A	TFAP2A_5	AACAAGGACAACCTCTTCGG	103	32	38	26
AIRE	AIRE_7	AACAAGGCCCGCAGCAGCAG	82	42	18	11
SP3	SP3_6	AACACACTTAAGAGTACAGG	68	45	24	12
CLOCK	CLOCK_3	AACACCAACCAAGATCCCGA	68	46	39	2
ZNF136	ZNF136_5	AACACCGAGGGAGAAATCTA	104	65	19	21
ZNF547	ZNF547_5	AACACTCCACTCACCTGTGC	134	66	40	25
DACH2	DACH2_5	AACACTCCCAAAGAACGCTT	181	156	64	23
TSC22D1	TSC22D1_6	AACACTGCTAACAGCAGCAG	170	86	45	28
MYRFL	MYRFL_1	AACAGACTTGTGTCCAGGGC	127	78	55	19
ZNF721	ZNF721_1	AACAGAGAGAAAGCTTACAC	88	43	57	3
TIGD6	TIGD6_1	AACAGATTTAGAGATCGCCA	91	42	20	8
HSF2	HSF2_1	AACAGGAAACTATTGAGTCC	77	46	21	9
REPIN1	REPIN1_5	AACAGGCACACTGGAAGGGG	71	7	15	4
FOXK1	FOXK1_1	AACAGGCATTCCGGAAACGG	173	93	85	58
CCDC169-SOHLH2	CCDC169-SOHLH2_1	AACAGGTGGATCAACTGCCT	63	37	28	13
TOPORS	TOPORS_2	AACAGTACTCCACTATCCGG	85	37	22	4
ZNF286A	ZNF286A_6	AACAGTGACATTCAAGGATG	22	12	17	3
ZNF790	ZNF790_2	AACATAAACAGTCAAGGCTG	91	54	33	10
ZNF804A	ZNF804A_4	AACATCAAGGGAGTTTTCCG	132	56	24	5
LHX3	LHX3_4	AACATGAAGCGCTCCCGCGG	88	33	27	16
GPBP1	GPBP1_4	AACATGTGCTCCCTTAACTG	95	53	16	12
ZNF107	ZNF107_1	AACATGTGGATGAGTGTACG	80	43	37	7
ZNF148	ZNF148_6	AACATTGACGACAAACTGGA	57	29	15	8
NR1H3	NR1H3_6	AACATTGTAGTGGAAGCCCG	9	4	11	5
THAP5	THAP5_4	AACCAAGATACAGGTAGAGG	88	23	25	11
FOXP1	FOXP1_6	AACCACCAGCATGCACACGG	170	91	36	23
ISL2	ISL2_1	AACCAGACGCGGATGACCCG	134	60	30	19
MITF	MITF_4	AACCATCTTAAAAGCATCCG	93	72	13	7
ETV2	ETV2_5	AACCCGGGGCTGCATGCGGG	42	12	12	8
ZNF599	ZNF599_7	AACCCTCCACTCACCAACGC	0	0	0	0
NEUROD6	NEUROD6_7	AACCGAGAAAGAAGAAGAGG	9	2	2	0
HOXC8	HOXC8_2	AACCGGCAGTCGTAATAGGC	59	11	11	3
USF3/KIAA2018	USF3/KIAA2018_2	AACCGGGAGACACACAATGC	46	19	24	12
TBPL1	TBPL1_2	AACCTAGTTTCTGCAGACTA	79	53	16	9
ZNF674	ZNF674_7	AACCTCAGTGCAGTGAACAT	121	95	34	18
RORB	RORB_1	AACCTGAACAACGAGACCAG	73	42	21	10
ZBTB47	ZBTB47_7	AACCTGAAGAAGCTGGGCGG	108	102	31	22
ZNF215	ZNF215_2	AACCTGAATTCATTGCGTAA	95	75	45	26
ZNF639	ZNF639_6	AACCTGTAGAAAAGGCAGTG	86	59	16	10
ZNF101	ZNF101_3	AACCTTCAGGAACCTGGCCT	69	58	29	3
ZNF177	ZNF177_6	AACCTTCCAGGAAGTGGCAG	110	35	14	11
ZNF558	ZNF558_7	AACCTTCGAGGATGTGGCCG	80	39	28	17
NR1I2	NR1I2_4	AACGCAGATGAGGAAGTCGG	215	182	69	52
ZNF644	ZNF644_7	AACGCTAATCTTCCACGGAC	104	56	35	10
ZNF625	ZNF625_7	AACGCTCGAGGCACATCCAA	21	49	21	10
YY1	YY1_4	AACGCTGGTCACCGTGGCGG	40	55	18	13
POU4F2	POU4F2_3	AACGCTGGTGGTGGCGGCGG	22	15	20	6
SOHLH1	SOHLH1_4	AACGGAGGCCAGGACAGGGG	22	18	2	4
RFX7	RFX7_1	AACGGATTCCTGCATTCAAC	114	96	36	18
PCGF2	PCGF2_2	AACGGCTCCAATGAGGACCG	38	25	14	8
PAX6	PAX6_6	AACGGGCAGACCGGAAGCTG	93	75	35	15
EGR1	EGR1_3	AACGGGTCAGAGATCTGCAG	118	82	31	27
ZNF721	ZNF721_3	AACGTGGCAAAGACTTTGGA	131	71	37	15
ZNF99	ZNF99_7	AACGTGGCAAAGCCTTTAAA	16	17	10	3
TRPS1	TRPS1_3	AACGTTGCAAGTGAAGGCGA	74	30	24	19
ZNF521	ZNF521_1	AACTAGAGGACAGAAACCCA	33	29	7	3
ZNF233	ZNF233_4	AACTCAACTCACCTGAAACT	98	84	43	16
ZBTB3	ZBTB3_2	AACTCCATAGTACCCCACGA	75	89	21	3
HOXA5	HOXA5_1	AACTCCCTAAGCAACTCCAG	41	80	28	30
DMRT3	DMRT3_7	AACTCGGCAGCAGGGCGCGG	77	38	31	19
TAL2	TAL2_1	AACTCTGCTTGAGAACTACC	53	24	22	6
SMAD4	SMAD4_1	AACTCTGTACAAAGACCGCG	42	26	20	13
ELF2	ELF2_7	AACTGAAGAGTCTGAACCCA	48	42	21	12
NR2C2	NR2C2_3	AACTGACAGCCCCATAGTGA	50	41	18	24
HOXC6	HOXC6_5	AACTGCAGACAAAACACCTT	119	51	33	18
RBAK	RBAK_3	AACTTACAGGGATGTGATGT	19	23	26	7
CDX4	CDX4_7	AACTTGGGCCCTGTGGGCGG	239	146	63	34
MYNN	MYNN_3	AACTTGTTCTACTACAGGTG	30	36	13	10
THAP2	THAP2_7	AAGAAAAGAATGGGTTCGCC	94	47	24	13
ZNF714	ZNF714_2	AAGAAAAGGCTCCGCAAATG	123	73	21	13
KIN	KIN_2	AAGAAAATCCGACTTCCCCA	175	24	46	3
HIC1	HIC1_1	AAGAAACGCCTCAAGCGCCA	56	38	19	17
EN2	EN2_4	AAGAAAGGCGGCGACCCCGG	179	111	59	23
PRR12	PRR12_4	AAGAAAGGGCCAGAGCGGGG	48	28	30	6
ZNF430	ZNF430_3	AAGAACAGGCTGTAAAAGTG	27	10	10	3
TIGD5	TIGD5_5	AAGAACCAGCCCCGCAGCAG	81	86	32	37
SP140	SP140_4	AAGAACCTGAAAATGGGCTC	56	22	11	7
AHCTF1	AHCTF1_3	AAGAACCTGAGAATGATCCT	72	119	16	6
CARF	CARF_1	AAGAACTTGGTAGATGCTGG	42	33	10	14
AKAP8L	AKAP8L_5	AAGAAGAAGAGAAAGCAGGG	8	9	7	8
ZNF280C	ZNF280C_5	AAGAAGAAGAGCTAGAGCCA	78	60	16	12
CXXC5	CXXC5_6	AAGAAGAAGCGGAAACGCTG	54	41	11	19
BARHL2	BARHL2_7	AAGAAGACGTGGAAGTCCTG	83	55	19	17
EEA1	EEA1_3	AAGAAGAGCAACAACTTCAG	94	47	30	13
ZNF280D	ZNF280D_4	AAGAAGAGGAGCTGGAACCA	98	41	28	6
YY1	YY1_5	AAGAAGAGTTACCTCAGCGG	28	31	20	13
HOXA4	HOXA4_6	AAGAAGATCCATGTCAGCGC	27	41	4	9
GLYR1	GLYR1_2	AAGAAGCATTTCTTTCCGCG	138	88	22	23
ZBTB7B	ZBTB7B_2	AAGAAGCTTTTCACTGAGGG	33	21	15	5
THAP7	THAP7_5	AAGAAGGACAACCCGAGGCG	77	34	21	2
GTF2IRD1	GTF2IRD1_7	AAGAAGGTGCAGCGGGGCGA	36	110	20	21
SOX3	SOX3_6	AAGAAGGTGCGCCAGCGTGG	62	39	19	18
PKNOX2	PKNOX2_1	AAGAAGTCCAAGAACAAACG	89	78	27	21
HIVEP1	HIVEP1_7	AAGAAGTCTCATCAAGGGCG	79	29	19	13
TWIST1	TWIST1_7	AAGAAGTCTGCGGGCTGTGG	104	72	34	25
MBD3	MBD3_2	AAGAAGTGCCCAGAAGGTCG	51	13	24	4
ZNF541	ZNF541_2	AAGAAGTTTAGAACCACAGG	113	86	38	26
ZNF66	ZNF66_1	AAGAATAGAGGACCGACTGA	38	59	21	15
SP1	SP1_3	AAGAATCGCACAGTCTCTGG	22	39	15	5
ZNF280D	ZNF280D_3	AAGAATGGTGCACTCAGTCG	93	53	31	10
POU2F2	POU2F2_3	AAGAATGTCTAAGCCCCTGG	28	31	19	3
ZNF17	ZNF17_4	AAGAATTCCCCACTCCTCCT	133	66	17	8
REL	REL_6	AAGAATTGTGGAAGTGTCAG	78	25	17	6
HBP1	HBP1_7	AAGACAAAGATGCACGACGC	103	64	26	16
ZNF221	ZNF221_4	AAGACAACAAGCCAAAGAGA	50	33	19	9
ZNF224	ZNF224_4	AAGACAGCAATCCAAAGGGA	70	78	21	12
ZNF727	ZNF727_7	AAGACAGTAGCCAAACACCC	17	25	5	2
ZNF564	ZNF564_2	AAGACCAGAGCATTGAAGAT	35	10	11	10
ZNF627	ZNF627_1	AAGACCCATTCAAAATTCCC	95	55	47	16
OTP	OTP_5	AAGACCCGGACAAGCAGCCC	81	39	20	6
NME2	NME2_1	AAGACCGACCATTCTTCCCT	114	55	35	11
EN2	EN2_2	AAGACGCTCTCGCTGCACGG	226	121	77	46
HMBOX1	HMBOX1_4	AAGACGGTCCAAAGTTTCCA	50	40	30	14
GATA2	GATA2_1	AAGACGTCCACCTCGTCTGG	49	33	16	11
FOXK2	FOXK2_5	AAGACTGGCTGACTGGACAG	13	37	14	2
ZNF561	ZNF561_5	AAGACTTGTGGATGTAGTGA	65	40	34	6
FOS	FOS_6	AAGAGAAAAGGAGAATCCGA	52	14	8	4
NFX1	NFX1_1	AAGAGAAATGCACTGTACGG	94	66	30	16
ZNF195	ZNF195_2	AAGAGACAGGAGGCAGCAGA	134	66	28	26
GMEB1	GMEB1_1	AAGAGAGCTATTCGTCTGGG	112	31	30	10
ZNF860	ZNF860_7	AAGAGATATCCACAGAATGC	50	19	17	9
ZNF578	ZNF578_4	AAGAGATGACCTGTGACTGA	55	52	17	18
ZSCAN25	ZSCAN25_4	AAGAGCACTGGAGGCCAAGG	47	41	20	10
ZFP82	ZFP82_2	AAGAGCCTTGGAAAGTTGTG	108	92	40	22
ZNF43	ZNF43_2	AAGAGCCTTGGGAGCCTATG	22	28	8	3
LHX4	LHX4_5	AAGAGCGTCAAGAGGAGCCG	30	14	12	7
ZNF614	ZNF614_2	AAGAGCGTGCAGCAATGCAA	172	146	60	62
RORA	RORA_4	AAGAGCTCCAGCAGATAACG	94	15	24	1
RFX5	RFX5_1	AAGAGGACGAACATGCACCT	76	36	23	13
FOXR2	FOXR2_7	AAGAGGAGACCCAGTCCTGA	71	54	13	6
NR0B1	NR0B1_7	AAGAGGCGCTACCAGGCGGG	88	75	39	27
TCF12	TCF12_7	AAGAGGCTCTTACCAGGGAG	83	39	32	5
ZNF24	ZNF24_2	AAGAGGGATCAAGTATCCCC	127	74	34	17
EBF1	EBF1_3	AAGAGGGCGTACCTTCCGAG	32	9	7	0
POU2F1	POU2F1_5	AAGAGGGGAGGACAAAGGAG	8	8	5	2
MBD1	MBD1_3	AAGAGGGTGAGATCACACGC	119	95	58	23
ZNF497	ZNF497_4	AAGAGGGTGGACCCTGCAGG	24	18	4	1
NFKB2	NFKB2_2	AAGAGGTGCAGCGGAAGCGG	42	16	17	17
ZNF208	ZNF208_7	AAGAGTCGAGACCTTACTAA	51	32	32	6
ZNF318	ZNF318_4	AAGAGTCGTCGGCCCCGCGG	95	51	29	24
ZNF280C	ZNF280C_1	AAGAGTGAGCCACACAGTCC	97	45	33	3
ZNF430	ZNF430_5	AAGAGTTGAAGACTGGCTAA	65	48	14	14
ZNF679	ZNF679_4	AAGAGTTGAGGAGAAGGCAA	95	42	26	10
MYSM1	MYSM1_3	AAGATAAAGGGACAAAGGCA	80	57	28	13
XPA	XPA_4	AAGATAATTGACACAGGAGG	102	100	38	9
ZNF155	ZNF155_2	AAGATACTTGCCACTTCCTA	69	34	13	9
THAP6	THAP6_6	AAGATAGAAGGTATGACTCC	45	12	13	2
ZNF136	ZNF136_2	AAGATCACTACAAACACCGA	70	38	21	14
ZNF442	ZNF442_2	AAGATCAGCACAGAAATCCC	140	89	62	16
LMX1A	LMX1A_1	AAGATCAGCAGAACACCCAG	72	30	23	6
ARID3B	ARID3B_3	AAGATCAGGATCAACGGCAG	78	42	28	10
KMT2A	KMT2A_1	AAGATCAGTAGCGGTCCCGG	92	31	13	7
ZNF141	ZNF141_3	AAGATCGTAGCCAGACCCCC	126	117	44	18
ZBTB14	ZBTB14_3	AAGATGAACAGACACCAGGC	105	60	45	30
ZNF14	ZNF14_2	AAGATGACCACAGAAACCAG	63	60	16	11
ZNF367	ZNF367_4	AAGATGACGGGCGGCGGCGG	100	98	25	16
ZNF878	ZNF878_1	AAGATGAGCACCAAAATCCT	206	108	51	22
ZNF80	ZNF80_1	AAGATGAGCCCTAAACGCGA	43	23	17	9
ZNF703	ZNF703_2	AAGATGCTGAGCGCTCACAC	38	41	11	12
PLAGL1	PLAGL1_1	AAGATGCTTCTACACCCGGA	98	73	30	19
CREB3L1	CREB3L1_4	AAGATGGAGGACACCACCCA	56	68	48	25
PURB	PURB_2	AAGATGGCGGACGGCGACAG	58	49	29	16
ARID5A	ARID5A_4	AAGATGGCTAAGGAGAACAG	20	10	10	5
BARX2	BARX2_2	AAGATGGTGCGACTCCGGCG	46	52	28	6
ZNF883	ZNF883_2	AAGATGTGCACTCCGATTGA	153	80	46	24
REPIN1	REPIN1_7	AAGATTCACAAGCGATCCGA	155	45	61	27
DUXA	DUXA_2	AAGATTCCTGAGGGACTGCA	63	23	8	7
ZNF439	ZNF439_6	AAGATTTGGGGCAGATCTGA	80	51	24	16
ZNF320	ZNF320_4	AAGCAACGAGCAACTCTTGC	16	11	7	0
ZFP1	ZFP1_6	AAGCAAGAGAAAACCCACAG	13	12	3	0
ZNF677	ZNF677_2	AAGCAAGGGATTATCACCAA	42	21	11	3
GZF1	GZF1_6	AAGCACAGCAAGCACCGCCA	190	80	60	18
SP6	SP6_3	AAGCACATGAAAACCCACGA	16	28	5	5
GRHL1	GRHL1_2	AAGCACTTTATCCACAGCGG	45	13	9	5
GABPA	GABPA_4	AAGCAGAGTGCACAGAAGAA	63	48	31	18
TERF2	TERF2_5	AAGCAGATTGGTCTTGGAGG	58	36	18	12
ZBTB25	ZBTB25_5	AAGCAGCAAGCACTGCTCTG	100	52	40	16
FOXF1	FOXF1_2	AAGCAGCAGCCACCGCACGG	61	72	21	22
ZSCAN31	ZSCAN31_6	AAGCAGCAGGCACATTCCAC	88	57	28	13
TCF7L2	TCF7L2_7	AAGCAGCCGGGAGAGACCAA	27	16	5	9
HMGA1	HMGA1_5	AAGCAGCCTCCGGTGAGTCC	57	18	32	11
GCM1	GCM1_1	AAGCAGGTCTCCACTACTGT	119	39	20	4
ZNF569	ZNF569_7	AAGCAGTGAGCACTGAGAGA	174	97	48	32
ZBTB33	ZBTB33_1	AAGCATCTCAGGTACAGCGC	79	59	38	10
ZNF266	ZNF266_6	AAGCATGCACGAACTCACAG	93	90	28	20
ZNF569	ZNF569_5	AAGCATGGAAAACTGAGAGA	17	19	6	1
ZNF878	ZNF878_6	AAGCATGTAAGGACTCACGC	43	19	19	3
ZNF35	ZNF35_5	AAGCCATGGCCCTAGCCCCA	34	25	8	6
ZNF410	ZNF410_7	AAGCCCCTGTCCCAATGGGA	197	160	79	50
ATOH8	ATOH8_7	AAGCCCTGCAGCAGACCCGG	194	106	66	27
JDP2	JDP2_6	AAGCCCTGGCAGGGAGCCTG	54	18	4	11
NME2	NME2_3	AAGCCGGACGGCGTGCAGCG	110	58	29	38
SP1	SP1_1	AAGCCGGTCGGAGGACCCGG	44	44	12	11
ZNF28	ZNF28_6	AAGCCTACGATGGCGTGCAA	90	55	24	16
ZNF28	ZNF28_4	AAGCCTATGATGGTATACGA	39	31	24	12
ZNF879	ZNF879_1	AAGCCTTCACTTCAATATCG	133	103	31	20
POU2AF1	POU2AF1_6	AAGCGAGGCCACGCCAGCAG	128	66	42	13
ZNF468	ZNF468_7	AAGCGATGATGTCTGACCGA	177	82	70	28
SEBOX	SEBOX_4	AAGCGGACCACCTTCAGCAA	58	15	22	8
ARX	ARX_7	AAGCGGAGTCGAGCGCCGGG	375	224	77	69
ZNF444	ZNF444_5	AAGCGGCGGAAGCGGTGCCA	117	69	29	18
ZNF493	ZNF493_5	AAGCGGTCCTCACACCTCGC	108	68	31	11
NFE2L3	NFE2L3_7	AAGCGGTGGTGGTCGGCCGG	197	100	67	42
TFAP4	TFAP4_7	AAGCTCAGGTACCTGCACGA	45	20	12	2
PURB	PURB_1	AAGCTCATAGACGACTACGG	45	26	19	7
IKZF2	IKZF2_3	AAGCTCCACACTGGTTACAG	90	27	10	6
MGA	MGA_7	AAGCTGATGGAAACAAGCAT	83	42	23	16
ZNF780B	ZNF780B_1	AAGCTGATTGAGGAGACTAA	76	75	29	18
SPDEF	SPDEF_1	AAGCTGCTCAACATCACCGC	80	55	22	9
AEBP2	AEBP2_4	AAGCTGGAATGAACAAAAGG	17	14	13	4
ZNF780A	ZNF780A_7	AAGCTGGTTGAGAAGACTAA	63	20	15	8
ZNF704	ZNF704_3	AAGCTGTCAGCCGAGAGCGG	19	31	12	20
MAFB	MAFB_2	AAGCTGTCGAAGCTTTGCAG	93	37	16	10
ZNF780B	ZNF780B_7	AAGCTGTGTCAGAAGACCAA	96	35	12	8
ZNF680	ZNF680_5	AAGGAAAAGAGCCCTGGAAT	102	82	38	16
SP140L	SP140L_2	AAGGAAAGTGACCAAGCATG	62	49	17	16
ZKSCAN5	ZKSCAN5_4	AAGGAACTTGGAGAACAGGA	42	17	8	5
MBD6	MBD6_4	AAGGAAGCCACCAAAAGCGA	22	26	7	6
FAM200B	FAM200B_7	AAGGAAGCTCATTGAATAGC	58	29	6	8
ISX	ISX_2	AAGGAAGGAAGAGCAAGCGG	100	40	14	7
ZNF682	ZNF682_5	AAGGAAGGATGGGGAAAATG	38	30	24	5
ZNF440	ZNF440_7	AAGGAATGTGGGAAACCCTT	16	29	18	4
ZFPM1	ZFPM1_2	AAGGACAGGAACCAGAACCC	35	10	11	1
DMTF1	DMTF1_5	AAGGACATAAATGGAAGCAG	44	32	10	11
ZNF90	ZNF90_4	AAGGACTAAGGAGCGCCTGA	81	82	36	16
ALX1	ALX1_6	AAGGACTGACAGCTACCCAC	163	195	83	46
ZSCAN29	ZSCAN29_6	AAGGAGAAAGAACTTCCAAG	14	12	0	3
ZFP37	ZFP37_5	AAGGAGAAGCACCATGGTTG	60	34	28	9
HOXC9	HOXC9_4	AAGGAGACGGCGCCGGACAG	110	67	35	43
ZNF418	ZNF418_3	AAGGAGACTCCACTCCTCCT	127	45	31	9
NFATC1	NFATC1_2	AAGGAGAGACGGACATCGGG	39	25	13	2
HEY1	HEY1_6	AAGGAGAGTGCGGACGAGAA	73	32	18	6
CREBZF	CREBZF_3	AAGGAGAGTTGGAAGCCGGG	61	30	18	4
ZNF383	ZNF383_5	AAGGAGATCACTTGAGGCTT	50	23	17	14
ZIM2	ZIM2_5	AAGGAGATGTACCAACCAGA	116	143	45	21
PRDM15	PRDM15_1	AAGGAGCAGGACACACCCCG	66	47	19	15
IRF8	IRF8_4	AAGGAGCCCTTCCCCGCCGG	88	39	25	8
HEYL	HEYL_4	AAGGAGCCGAGCGGCTCCGA	59	47	25	15
TBX2	TBX2_3	AAGGAGCCGGCCGAGAGCGG	90	53	27	23
ZNF480	ZNF480_7	AAGGAGCGCAATCCTATAGA	7	3	0	8
ZNF235	ZNF235_2	AAGGAGCTTCAAACCCAAAG	163	92	44	22
ZNF541	ZNF541_6	AAGGAGGAAGGGCCACCTCG	162	103	56	24
CIC	CIC_3	AAGGAGGAGCAAGAGGGCGG	18	35	2	3
ZNF687	ZNF687_2	AAGGAGGTCATCAAAATCAG	54	29	22	3
GRHL1	GRHL1_4	AAGGAGGTGAGCAGCAGTGA	121	51	34	24
KMT2B	KMT2B_4	AAGGAGTAGGGGCCTCCGGG	65	24	24	10
SETDB2	SETDB2_3	AAGGAGTCTACGAAACGTGG	85	45	14	23
ZNF660	ZNF660_1	AAGGAGTGTGGGAAAACATG	39	54	20	13
AHCTF1	AHCTF1_7	AAGGATAACATCGTTACCAC	162	114	49	25
ZC3H8	ZC3H8_1	AAGGATCAAATGCTTTGCTG	59	41	11	15
ZNF676	ZNF676_3	AAGGATCGAGGACCAGCTGA	99	30	19	5
GATAD2A	GATAD2A_5	AAGGATGATCAAGCAGCTGA	74	30	22	10
ZNF136	ZNF136_6	AAGGATGGTAGTCAGCGTGG	40	41	15	8
CDX1	CDX1_3	AAGGATTCGCCCGTGTACCC	51	37	21	11
ZNF440	ZNF440_6	AAGGATTGACACAGCTCTGA	108	72	34	21
ZNF729	ZNF729_6	AAGGATTGAGGACTGACTAA	38	30	10	10
ZMAT4	ZMAT4_2	AAGGCAAAATCCACGCCAAG	81	69	41	20
ZNF570	ZNF570_2	AAGGCAACCAGGTAATCAGA	46	24	12	3
STAT4	STAT4_1	AAGGCAATTGGAGAAACTAG	35	23	15	7
ZNF124	ZNF124_1	AAGGCAATTGGAGTAACGGA	65	30	27	13
ZSCAN16	ZSCAN16_1	AAGGCAGAGGACCATTACTG	70	49	24	10
GLI3	GLI3_4	AAGGCAGGGAAAAGATGAGG	46	14	9	4
FOXF1	FOXF1_7	AAGGCAGGTGGGGCACCGAG	76	55	21	17
ZNF501	ZNF501_4	AAGGCATATGCTCTGACTGA	112	38	28	13
ASCL3	ASCL3_3	AAGGCATCGGGAAAGAGAAG	87	28	20	14
FOXF1	FOXF1_1	AAGGCCAAGAAGACCAACGC	108	33	23	9
ZNF490	ZNF490_4	AAGGCCGCACAGGAACAGGA	115	113	43	30
MBD2	MBD2_7	AAGGCCGCTGCCGCCACTCG	148	168	77	34
RARB	RARB_1	AAGGCCGTCTGAGAAAGTCA	65	29	19	12
ZNF121	ZNF121_7	AAGGCCTGAGCGCCCAGCGA	39	47	20	8
ZNF559	ZNF559_5	AAGGCCTGATGAGATACTGA	106	27	28	10
ZEB2	ZEB2_7	AAGGCGAGACAGCTCCTCAG	40	68	12	19
HOXD10	HOXD10_6	AAGGCGGCCTTCCCGAAGAG	75	11	12	5
GBX2	GBX2_2	AAGGCGGTGCTACTCCCCAG	141	52	31	17
CRX	CRX_5	AAGGCGTTGACAGAATAGTG	72	37	30	9
E2F8	E2F8_2	AAGGCTCTCAGGGAGAGCCG	29	21	9	2
DMRTB1	DMRTB1_1	AAGGCTGGGCATCGCCACGG	54	55	34	4
ZNF142	ZNF142_7	AAGGCTGTGGATAAAGGCCA	51	37	19	9
ZNF283	ZNF283_7	AAGGCTTGAACCCCAACTAA	173	98	43	19
ZNF677	ZNF677_7	AAGGCTTGAACGTTCAGCAA	113	56	42	28
ZNF728	ZNF728_7	AAGGCTTGAGGACCGGGTGA	167	95	60	24
ZNF140	ZNF140_2	AAGGGAAAGAACCCTGGCTG	64	61	19	13
ZNF440	ZNF440_1	AAGGGAACTGGAATGAGGGA	58	22	25	12
ZNF124	ZNF124_5	AAGGGAACTGGCGTATCTGA	67	43	32	8
ZNF891	ZNF891_4	AAGGGAAGAGGAAACACTGA	60	36	21	12
ZNF501	ZNF501_6	AAGGGAAGAGTTCTGAGTGA	61	31	18	9
ZNF669	ZNF669_5	AAGGGAAGTGGAACAGCTGA	53	28	9	10
ZNF454	ZNF454_3	AAGGGAAGTGTGGATGCCAG	117	52	33	13
AC008770.3/ZNF700	AC008770.3/ZNF700_5	AAGGGAATTGCAACATCTGA	219	119	61	46
RORB	RORB_6	AAGGGACAGCCTGTATGCTG	186	65	41	35
ZNF816	ZNF816_5	AAGGGATGACATCTGAGTGA	294	199	101	77
ZNF611	ZNF611_5	AAGGGATGACCTGCGACTGA	136	56	37	23
ZNF808	ZNF808_7	AAGGGATGACCTGTTACTGA	160	36	35	19
ZNF761	ZNF761_6	AAGGGATGACGTCCGACTGA	76	41	39	19
ZNF813	ZNF813_6	AAGGGATGACGTCTGACTAA	264	139	62	45
ZNF791	ZNF791_7	AAGGGATGAGAGACGCATGA	27	67	15	13
ZNF600	ZNF600_1	AAGGGATGATACCTGACTGA	53	50	17	9
ZNF569	ZNF569_6	AAGGGATGCAATTCGAGGGA	61	28	14	10
ZNF808	ZNF808_5	AAGGGATGCCCGGTGACGGA	40	36	8	11
ZNF354A	ZNF354A_1	AAGGGATGTACTGAGAGTAA	154	60	53	31
FOXA2	FOXA2_2	AAGGGCACGAGCCGTCCGAC	63	52	20	7
FOXA1	FOXA1_5	AAGGGCATGAAACCAGCGAC	82	67	27	40
ZNF845	ZNF845_6	AAGGGCTGAATTTCGACCGA	54	17	14	18
MEF2A	MEF2A_7	AAGGGCTGACAGGTCAGCGC	74	61	35	18
ZNF90	ZNF90_7	AAGGGCTGAGGAGTACTTGA	58	38	24	4
ZFP37	ZFP37_1	AAGGGGAAAAGACCCAGTCA	33	32	26	8
ZBTB45	ZBTB45_5	AAGGGGAAGAGTGCAACGGG	52	31	22	17
CIC	CIC_6	AAGGGGACTAAGGAGTGCCA	22	15	9	4
CREB3L1	CREB3L1_5	AAGGGGCTGAGGCCCAGCAG	48	49	9	13
TCF7L2	TCF7L2_5	AAGGGGTAGCCGGGATACGG	68	48	31	10
ZIC5	ZIC5_3	AAGGGGTGGGAGGAAGAGGA	14	1	1	5
SETDB2	SETDB2_5	AAGGGGTTTTATAACTCACG	52	58	22	20
ZNF124	ZNF124_7	AAGGGTACTAGCACGACTAA	69	31	16	8
ZNF20	ZNF20_1	AAGGGTAGTGGAACGAGTAA	54	45	23	11
ZNF486	ZNF486_7	AAGGGTATAGGGGTACATAA	50	42	15	11
ANHX	ANHX_3	AAGGGTCACCAGCTCCGCCG	113	43	34	37
ZNF285	ZNF285_5	AAGGGTGACATTCAAGGATG	68	56	14	5
THAP11	THAP11_5	AAGGGTGAGAAGCACGGCCG	98	34	77	3
ZNF100	ZNF100_5	AAGGGTTGAGAACCAGTTGA	134	123	56	49
ZNF260	ZNF260_4	AAGGGTTGAGAACTGAGAAA	67	35	19	11
ZNF728	ZNF728_2	AAGGGTTGAGAAGTTACCAA	81	93	28	23
ZNF208	ZNF208_1	AAGGGTTGAGACCTTACTGA	100	40	36	8
ZNF91	ZNF91_7	AAGGGTTGAGGACCAATGAA	70	24	19	12
ZNF93	ZNF93_5	AAGGGTTGAGGATGCAACAA	172	72	50	25
PLAG1	PLAG1_2	AAGGTAAGGACATCACCGGA	124	78	33	17
ZNF765	ZNF765_2	AAGGTACGACTTCTGACTAA	98	42	28	14
ZNF573	ZNF573_6	AAGGTAGCCATACAAGCTAA	33	38	7	6
ZNF570	ZNF570_7	AAGGTAGGCAAACTGGCTGA	68	52	17	14
ZNF737	ZNF737_6	AAGGTATGAAAACCGGCTAA	76	79	16	8
ZNF600	ZNF600_5	AAGGTATGACCTCAGACGGA	87	57	15	19
ZNF611	ZNF611_3	AAGGTATGACCTGTGACTGA	118	47	29	14
ZNF845	ZNF845_7	AAGGTATGACGTTTGACTGA	89	44	15	19
DMRT1	DMRT1_6	AAGGTCCGGGGAGGCCCCGA	84	33	36	12
E2F1	E2F1_2	AAGGTCCTGACACGTCACGT	80	39	34	1
ZNF705E	ZNF705E_7	AAGGTCGGAAGACAGACTGA	94	27	22	14
ZNF705B	ZNF705B_5	AAGGTCGGAGGACAGACTGA	44	37	18	7
ZNF404	ZNF404_7	AAGGTCTCCAACACGACTGA	51	54	31	7
ZNF626	ZNF626_5	AAGGTCTGAAGACCGCTTGA	112	64	25	19
ZNF727	ZNF727_5	AAGGTCTGAGAACCACCTAA	50	29	15	9
ZFP14	ZFP14_2	AAGGTCTGGACCACATACGA	79	46	17	8
ZNF253	ZNF253_6	AAGGTCTGTGGATCGGTTGA	84	41	41	16
ZNF124	ZNF124_4	AAGGTGACTGGAACGACTGA	15	28	17	6
ZNF669	ZNF669_7	AAGGTGACTGGAACGAGTGT	83	46	20	20
ZNF750	ZNF750_4	AAGGTGAGCCGGCTTTCCAG	46	37	25	11
TBX15	TBX15_6	AAGGTGAGTGTGCGCACAGG	116	73	45	18
ZNF33A	ZNF33A_2	AAGGTGCGAAGTCACACGGA	215	131	57	30
TIGD6	TIGD6_7	AAGGTGCGGGAGGCATCCGT	37	67	18	14
AC008770.3/ZNF700	AC008770.3/ZNF700_4	AAGGTGCTTCACATATCTGA	298	210	81	57
FOXR2	FOXR2_5	AAGGTGGCTACAATTGAGAG	64	17	8	8
ZNF607	ZNF607_1	AAGGTGGGAAAACTGACGAA	57	33	14	4
ZNF329	ZNF329_4	AAGGTGGGAGATGTCAGTGA	88	90	22	27
ZNF492	ZNF492_1	AAGGTGGGATAACTGGCTAA	80	46	17	8
ZNF781	ZNF781_1	AAGGTGGGCACGCTTTCTAA	142	95	27	26
ZNF558	ZNF558_3	AAGGTGGTGACAGAGGAAAG	5	2	8	6
LIN28B	LIN28B_3	AAGGTGGTGGAGAAGAGCCC	5	14	0	0
SALL1	SALL1_5	AAGGTGGTGGCACTGCCCGC	154	94	45	19
ZSCAN20	ZSCAN20_3	AAGGTGTCAGGTGTTCACTG	56	14	16	14
ZFHX2	ZFHX2_5	AAGGTGTCCGAAGGCAGGGA	8	24	7	6
ZNF708	ZNF708_5	AAGGTGTGAAGATAGGGTAA	60	28	17	5
ZNF730	ZNF730_4	AAGGTGTGAGAACCGCCTAA	93	65	29	12
ZNF626	ZNF626_6	AAGGTGTGAGGACCGCTTGA	39	86	28	26
ZNF90	ZNF90_6	AAGGTGTGAGGACCTGTTGA	53	37	21	20
ZNF737	ZNF737_7	AAGGTGTGAGGACGAGTTGA	66	22	13	7
ZNF681	ZNF681_2	AAGGTGTGAGGACTGCCTAA	46	51	34	5
ZNF486	ZNF486_5	AAGGTGTGAGGAGCGGGTGA	34	16	8	9
ZNF253	ZNF253_7	AAGGTGTGAGGATAGGTGAA	83	60	25	27
ZNF844	ZNF844_5	AAGGTGTGAGGCAGATGTGA	15	21	16	1
ZNF502	ZNF502_5	AAGGTGTGCATACTTGCGGA	79	70	32	16
ZNF454	ZNF454_2	AAGGTGTGCCCTGCACACAA	58	24	10	3
ZNF883	ZNF883_5	AAGGTGTGTACTTCGACTGA	126	52	32	12
GATAD2B	GATAD2B_7	AAGGTTCATATAGATGGCAG	83	45	30	18
ZNF440	ZNF440_2	AAGGTTCTGGGCAGATCCGA	141	59	38	31
NFX1	NFX1_3	AAGGTTGATTCTGAAGGCCA	118	37	25	23
HSF2	HSF2_7	AAGGTTTAAAGCCAAGGGAG	44	37	19	2
ZNF44	ZNF44_6	AAGGTTTCCAGGAGAACTGA	36	8	7	4
ZNF844	ZNF844_6	AAGGTTTCTGACAGATCCAA	108	61	33	20
ZNF573	ZNF573_7	AAGGTTTGAAGCACGACTGA	139	98	53	36
AC008770.3/ZNF700	AC008770.3/ZNF700_6	AAGGTTTGAGGCACAACTGA	219	176	57	38
ZNF728	ZNF728_5	AAGGTTTGCAACCTTACTGA	93	54	23	16
ZBTB40	ZBTB40_5	AAGGTTTGCACAGCAGGGGA	46	22	14	10
ZNF345	ZNF345_1	AAGGTTTGCACCACTACCAA	106	57	26	11
ZNF479	ZNF479_6	AAGGTTTGCAGACCAGCTAA	59	35	28	17
DR1	DR1_3	AAGGTTTTCCAAACGAGAAC	18	3	5	2
VAX1	VAX1_6	AAGTAAATCCAATTCCGCAG	33	19	7	4
VEZF1	VEZF1_6	AAGTAGAAACACTGAGACTG	73	33	27	14
ZNF404	ZNF404_1	AAGTAGATAGCTGCGAACAA	70	44	21	17
ZNF420	ZNF420_2	AAGTAGTAAGCCACGCGCAA	46	72	27	12
HLF	HLF_3	AAGTATCTCCGTCATAGGGA	78	57	22	12
ZNF800	ZNF800_1	AAGTCAGCCTGCGACTCCTG	151	81	81	38
ZNF789	ZNF789_3	AAGTCATTAGGCGTAAGGCA	109	45	34	12
PAX6	PAX6_1	AAGTCCCCGGATACCAACCA	230	153	105	41
PRDM5	PRDM5_5	AAGTCCTCCCGGGTTCAGGA	165	118	44	28
SHOX2	SHOX2_1	AAGTCGGACCAATTTCACCC	76	25	18	6
RHOXF2	RHOXF2_4	AAGTCGGCAGGAGCCCAAGG	97	85	46	38
ZBTB40	ZBTB40_7	AAGTCGTCTTCACAGCCTGG	113	91	24	16
PHF20	PHF20_3	AAGTCTTCCCAAGAACGAGA	32	21	15	2
OVOL2	OVOL2_5	AAGTCTTCCTGGTGAAGAGG	41	17	11	6
ZNF728	ZNF728_6	AAGTCTTGAGGACCAGATGA	41	43	16	15
SP100	SP100_5	AAGTGAAGAAGAAGAGAGGG	15	21	6	15
LBX2	LBX2_6	AAGTGAGTCTTGGGGAGTTG	37	38	23	24
ZNF669	ZNF669_2	AAGTGATGCAGGAAACCTGC	83	65	36	21
ZNF589	ZNF589_7	AAGTGATGCTGGAAAATCTC	153	72	28	22
ZNF260	ZNF260_7	AAGTGATGTGATTCGAGAGA	10	12	1	3
ZNF146	ZNF146_2	AAGTGATGTTCGCTGAGAGA	47	5	6	12
ZFP37	ZFP37_2	AAGTGCGGAAACGACCAAAG	29	13	22	2
PGR	PGR_7	AAGTGGTCTAAATCATTGCC	52	73	22	20
HIF1A	HIF1A_1	AAGTGTACCCTAACTAGCCG	32	20	4	3
ZNF432	ZNF432_4	AAGTGTTCTCCAGAAAGTCC	87	59	20	29
LBX1	LBX1_4	AAGTTACTCGCTGTGCGGGG	105	89	34	36
NPAS3	NPAS3_3	AAGTTATAGGTGCACAGCGA	61	65	21	15
ZNF788	ZNF788_1	AAGTTCTGAGGCGCATCCAA	132	105	47	18
ZNF805	ZNF805_5	AAGTTCTTGGATGTTGACTG	60	29	15	11
ZNF24	ZNF24_6	AAGTTGGAGGAGGATCCTGA	42	53	28	19
ZNF280B	ZNF280B_4	AAGTTGGGAAGCTGGCAGGA	90	42	16	10
ZNF518A	ZNF518A_2	AATAACTGTTTCTGTTCAGA	70	70	28	13
ZNF573	ZNF573_1	AATACCTGGACCCTAATCAG	28	31	36	10
CCDC169-SOHLH2	CCDC169-SOHLH2_7	AATACCTGGGCCATAACGGC	196	96	70	24
ZNF383	ZNF383_4	AATACTAGAAGCCATGGCTG	54	44	35	14
ZNF12	ZNF12_4	AATAGAGAGAATCCAGGAAG	50	41	10	7
NR1H4	NR1H4_7	AATAGGTCAGAATGCCCAGA	148	82	32	22
ZNF385D	ZNF385D_1	AATATCAACGACGACAACTG	124	79	30	22
ZNF786	ZNF786_6	AATATCCTGGATTGAACACG	101	47	33	3
ZNF766	ZNF766_6	AATATCTCCAGTTCTGGCAG	66	39	41	11
HHEX	HHEX_3	AATATCTCTCTCCGCCCGAG	137	70	59	12
ZKSCAN1	ZKSCAN1_6	AATATCTCTGGGTCTGGAGG	145	105	54	15
ZNF529	ZNF529_4	AATATCTGGATTCTGCTCAG	90	59	40	38
TGIF2LY	TGIF2LY_1	AATATGGAGGCCGCTGCAGA	170	71	51	21
TGIF2LX	TGIF2LX_4	AATATGGAGGCCGCTGCGGA	74	101	49	18
ZNF83	ZNF83_5	AATCACTGGAGAATCCACAC	40	27	9	9
ZNF225	ZNF225_7	AATCATCAGAGAATCCACAG	58	32	11	4
ZNF587B	ZNF587B_2	AATCATCAGAGAGTTCACAG	60	42	23	11
MYBL1	MYBL1_4	AATCATGATCGGCATACTGA	189	127	74	37
NR2C2	NR2C2_1	AATCCAGATAGTCACCGCAG	65	32	19	8
NKX2-8	NKX2-8_4	AATCCAGCCAGGCGGCGCAG	87	37	25	11
NANOGNB	NANOGNB_1	AATCCCTCATGCATACTCTC	137	104	48	39
ZNF610	ZNF610_6	AATCCCTGGACCCTGGACAG	46	50	17	15
ZNF583	ZNF583_7	AATCCTTAAAGCCATGTCCA	85	40	21	7
POU2F1	POU2F1_7	AATCTCAACAGCCCAGGCGC	207	99	59	25
ZBTB6	ZBTB6_1	AATCTCAACCGACACATCCG	106	44	33	7
CREBL2	CREBL2_4	AATCTCAGCAGAACTCAAGC	82	37	24	11
GRHL2	GRHL2_6	AATCTCTCCGTCAGAAGCAG	47	23	7	11
SOX5	SOX5_4	AATCTGAGTGGAGATTCTGA	96	34	19	20
NFE2	NFE2_6	AATCTGGGTGGATTGAGCAG	28	25	23	8
FOXK2	FOXK2_4	AATGAAAAGGAAGCTTCAGG	52	41	13	14
ZNF613	ZNF613_7	AATGAAATGAACTTCCCCGA	22	26	7	12
ZNF285	ZNF285_4	AATGAAGCACTTCTTGCGAA	7	15	2	1
TERB1/CCDC79	TERB1/CCDC79_3	AATGAATCTACTACCCCTGG	47	37	19	11
ZNF10	ZNF10_2	AATGACAACTCTCTTACTCA	174	59	49	23
ZNF324B	ZNF324B_6	AATGACCACACGAGGTCGGG	78	51	17	24
ZFX	ZFX_4	AATGACCATGGACACAGAGT	28	24	13	6
RUNX2	RUNX2_3	AATGAGCGACGTGAGCCCGG	93	48	21	25
ZFP42	ZFP42_5	AATGAGGAGATGCTTTCTCA	74	45	20	7
ZNF596	ZNF596_5	AATGATATCCTCGAAGGTCA	97	60	30	9
ZNF845	ZNF845_4	AATGCAGCAGGACCTTTAGT	170	96	43	29
YY2	YY2_4	AATGCAGGTCAAAACGCTGG	26	19	14	2
ZNF148	ZNF148_7	AATGCAGTCTTCCAGGACAA	37	32	12	6
ZNF397	ZNF397_2	AATGCCAGAGTTGCACACAA	103	85	38	18
ZNF18	ZNF18_7	AATGCCCGTTGACTTGGGGC	97	62	25	19
ZNF461	ZNF461_1	AATGCCTGAACCCAGCGCAG	67	45	13	9
ZNF611	ZNF611_2	AATGCCTGAACCCTTCACAG	129	84	42	10
ZFP30	ZFP30_1	AATGCCTGAACTCATATCAG	185	72	41	21
ZNF415	ZNF415_5	AATGCCTGAACTCTACACAG	65	75	31	14
ZNF680	ZNF680_1	AATGCCTGGACACTGCACAA	96	65	27	13
ZNF695	ZNF695_6	AATGCCTGGACCCAGCTCAG	56	42	15	13
ZNF860	ZNF860_6	AATGCCTGGACCCTACGCAG	36	50	13	9
ZNF479	ZNF479_3	AATGCCTGGATTGTGCTCAG	39	33	2	3
CCDC17	CCDC17_4	AATGCGGCCCTGGATAACAG	26	54	18	6
ZNF575	ZNF575_7	AATGCGGGCAAGGATAGGGG	31	31	16	8
ZBTB3	ZBTB3_3	AATGCGTGAGGGAGATGCTT	113	90	33	26
ZNF556	ZNF556_7	AATGCTATCCTCACCTACTG	66	39	20	10
PRDM5	PRDM5_4	AATGCTGGGCATGTACGTGC	122	57	39	16
ZNF800	ZNF800_7	AATGCTTCCAATTCACCTGA	102	66	35	12
ZNF20	ZNF20_6	AATGGAACTGGAACAAGTGA	101	77	34	12
ZNF544	ZNF544_2	AATGGAAGCACGTTCTATGC	41	35	28	9
KCNIP3	KCNIP3_7	AATGGACCGGAACCAGGATG	62	95	17	14
HDX	HDX_5	AATGGAGACTGGAGATGCTG	44	34	32	11
DRGX	DRGX_4	AATGGAGGAAGACAGAGAGA	20	14	2	2
ZNF791	ZNF791_4	AATGGAGGTGGAACATCTGA	130	34	37	12
HOXA5	HOXA5_3	AATGGCATGGATCTCAGCGT	33	23	7	11
ZNF583	ZNF583_5	AATGGCTGAACCCTGCTCAG	37	14	14	12
ZNF282	ZNF282_4	AATGGGACATGGACGCCCGG	81	44	32	7
HINFP	HINFP_7	AATGGGACTTGATAGAGCAG	135	68	45	35
ZNF451	ZNF451_5	AATGGGCAGTGAGCTCCATG	16	4	10	0
SKIL	SKIL_2	AATGGGCCAGGAAGAACCTG	13	7	3	1
ETV7	ETV7_4	AATGGGCTCGCCAGACTCTG	120	66	36	34
PRDM10	PRDM10_4	AATGGGGAAAAGAGTGACGA	80	36	37	17
ZNF703	ZNF703_5	AATGGGGCTGACGGGAGTGG	71	93	24	28
NR4A2	NR4A2_3	AATGGGGTTGGGCACAGCGA	76	28	24	10
ZEB1	ZEB1_4	AATGGGGTTTTCACTGGTGG	154	97	69	54
HNF4G	HNF4G_7	AATGGGTCTTGAGACAAATG	69	70	15	13
TBX18	TBX18_7	AATGGGTTTGGAAGCCTTGG	34	14	11	13
NFAT5	NFAT5_3	AATGGTAGGGCTGGAAGAGG	29	11	5	3
GLI2	GLI2_4	AATGGTGGCAAGAGATGCTG	82	36	23	8
SKIL	SKIL_7	AATGTAATCAGCCCACAGGA	37	21	16	10
ZNF781	ZNF781_2	AATGTAGAAAGACGTTTAGG	82	75	30	17
ZNF639	ZNF639_7	AATGTAGTGACTGCTTGATG	101	101	39	16
ZBTB8A	ZBTB8A_3	AATGTATTATTCGCTAGTAG	95	74	39	18
ZNF609	ZNF609_3	AATGTCAGGCTCAAAGGAGG	48	20	17	17
ZNF101	ZNF101_6	AATGTCCTTCTTACCGACCG	65	13	13	6
DZIP1	DZIP1_5	AATGTGAACAAACCAGTCGG	64	51	33	5
ZNF462	ZNF462_1	AATGTGAATGAGCTACGATG	43	14	25	5
ZNF550	ZNF550_6	AATGTGACTCACAGCAACCA	108	49	35	12
TBX15	TBX15_4	AATGTGCTGACCTCTGGAAG	45	28	21	9
MTF1	MTF1_2	AATGTGCTGCACATAACCCT	107	79	35	14
THAP2	THAP2_6	AATGTGCTTGTTGTAGGTAG	227	50	16	14
ZNF682	ZNF682_6	AATGTGGAAAAGCCTTTCAC	85	30	25	10
ZNF736	ZNF736_3	AATGTGGCAAAGCATCGAGC	52	25	15	12
ZNF528	ZNF528_5	AATGTGGCAAAGCATTTCGA	49	49	25	24
ZNF493	ZNF493_7	AATGTGGCAAAGCCTTTATC	40	24	17	16
ZNF141	ZNF141_7	AATGTGGCAAAGCCTTTGGA	15	13	16	5
ZNF534	ZNF534_5	AATGTGGCAAGGTCTTCCGT	122	41	26	23
ZNF816	ZNF816_7	AATGTGGCAGGAGTTTCAGT	105	53	26	12
ZNF26	ZNF26_6	AATGTGGGAAAGCCTACAGT	71	59	32	8
ZNF222	ZNF222_5	AATGTGGGAAGAGCTTCAAA	64	26	27	19
ZNF98	ZNF98_6	AATGTGGTAAGGCCTTTAGC	17	25	20	7
SP2	SP2_1	AATGTGGTGAAGCTGACAGG	23	22	7	10
ZNF43	ZNF43_4	AATGTGGTGAAGCTTTTAGC	31	31	15	12
MTERF1	MTERF1_1	AATGTTAGCTTTCACCCGCT	316	95	64	22
VEZF1	VEZF1_3	AATGTTTCTGGTGCACCCTG	136	45	46	20
FAM200B	FAM200B_2	AATTCCACAGAATCTCATGG	18	27	2	7
ZNF578	ZNF578_2	AATTCCTGAACCCTGCGCAG	17	12	12	3
ZFP14	ZFP14_6	AATTCCTGGATCCTGCTCAG	34	20	6	0
DNTTIP1	DNTTIP1_7	AATTCGCCGGGAAGGCCCCA	155	87	37	12
MTERF2	MTERF2_1	AATTCGTAGATTAAAAGGAT	75	59	31	14
ZNF436	ZNF436_5	AATTCTCCTGCATAACATCC	121	88	44	15
ZNF729	ZNF729_2	AATTCTGCTGAACCGTGTCC	82	62	18	11
ZNF99	ZNF99_1	AATTCTGCTGAGCCATGTCC	145	80	41	21
ZNF195	ZNF195_5	AATTCTGCTGAGCGAGGTCC	83	75	17	25
ZNF679	ZNF679_2	AATTCTGCTGAGCGTGATCC	150	68	35	24
ZNF273	ZNF273_7	AATTCTGCTGTGAAGTGTCC	90	80	31	22
ZNF33B	ZNF33B_6	AATTCTTCCTCCAGTCTCCA	170	58	36	10
ZNF33A	ZNF33A_7	AATTCTTCCTCCTGTTTCCA	152	74	40	24
CDC5L	CDC5L_3	AATTGCACGTCAAACTGCCG	211	82	59	36
PAX5	PAX5_1	AATTGGAGGATCCAAACCAA	232	65	90	13
ZNF518B	ZNF518B_6	AATTGGGAGGAGCTGCACCG	85	52	31	8
ZNF286B	ZNF286B_2	AATTGGTTAGAGAAGCAGCA	92	84	38	19
ZNF596	ZNF596_4	AATTTCCCACTCACCGGTGA	116	74	36	12
ZNF14	ZNF14_7	AATTTGACTGGAACGAAGGA	13	16	10	9
POU4F3	POU4F3_7	AATTTGGGTTCTTGCAGCAC	68	63	49	16
GTF2B	GTF2B_2	ACAAAAGATCCATCTCGAGT	97	59	22	16
ZNF277	ZNF277_3	ACAAAATAAGCAGACTGCAG	119	68	57	23
ARID5A	ARID5A_6	ACAAAGCAGTGGAGAAGCTG	38	23	24	7
GTF2B	GTF2B_7	ACAAAGGTTGGAACAGAACC	29	11	17	5
ZNF70	ZNF70_5	ACAACAAGGGCTTTTCCCAG	77	39	29	17
EBF3	EBF3_6	ACAACAATTCCAAACACGGG	58	22	31	14
TFEC	TFEC_6	ACAACAGAGAGCCCGAGAAT	56	37	25	14
CCDC169-SOHLH2	CCDC169-SOHLH2_6	ACAACATGTCCCTCAAACAC	126	87	41	23
MXD4	MXD4_4	ACAACGAGCTAGAAAAGCAC	7	6	3	1
NFIL3	NFIL3_2	ACAACTACTTGACACCATCG	120	82	51	20
HSF5	HSF5_3	ACAACTTCCCCGCCAAGCTG	62	51	18	15
IRF2	IRF2_7	ACAACTTGGCAAATGTCTGG	98	36	37	13
ZNF443	ZNF443_1	ACAAGAACTGGAATCAGGGA	145	99	33	25
ZNF224	ZNF224_3	ACAAGACAGAAATCTTCCCA	28	3	9	5
ZNF684	ZNF684_5	ACAAGAGCCATGGATGGTGG	13	19	8	7
ZZZ3	ZZZ3_3	ACAAGGAGTCAGTAGAACAG	72	25	28	3
TIGD6	TIGD6_3	ACAAGGGGAACAAGAAGCGT	17	12	1	0
ZNF644	ZNF644_6	ACAAGGGTCCTCGAAAGACT	127	63	48	15
NPAS2	NPAS2_2	ACAAGTCTGAGAAGAAGCGT	74	28	19	4
SATB2	SATB2_6	ACAAGTTGTGGACTAAGCTG	38	34	16	3
STAT5B	STAT5B_3	ACAATATATGGCGGATGCAG	36	21	7	4
MXD3	MXD3_4	ACAATGAACTGGAGAAGCGC	61	66	20	13
ZKSCAN7	ZKSCAN7_6	ACAATGACCACTGCAGGCAG	73	70	29	25
DACH1	DACH1_1	ACAATGACTGCACCAACGCA	59	38	44	17
GABPA	GABPA_6	ACAATGGCCAAATCCAACTA	75	20	25	4
ZSCAN29	ZSCAN29_3	ACAATGTCCAGAAAATGGAG	35	28	12	7
NFE2L1	NFE2L1_1	ACAATTACTTCACTGCCCGG	142	63	31	7
ZNF827	ZNF827_5	ACACAAAGAAGACACTCCCG	165	89	39	24
ZNF763	ZNF763_2	ACACAAGAAAGGAATCACAC	0	0	0	0
HSFY2	HSFY2_1	ACACAATGGAGACCTAGTGG	121	126	37	25
NKX2-6	NKX2-6_1	ACACACACCACTGGCCAGCG	155	88	37	27
ZFPM2	ZFPM2_5	ACACACAGTCAGAGAAACCG	36	50	13	15
ZSCAN31	ZSCAN31_3	ACACAGAAGAATCCACACAG	58	30	7	6
ZNF581	ZNF581_6	ACACAGCATCACCCACTCGG	87	23	24	14
ZNF160	ZNF160_6	ACACAGCTCTTCACAGTCCA	161	55	43	18
ZNF177	ZNF177_3	ACACAGTCTGATCTCCAAGG	59	43	22	16
ZNF148	ZNF148_4	ACACATGAAAGACTTCCTCA	171	67	53	15
ZNF709	ZNF709_1	ACACATGAGAATGCACACAG	48	28	14	7
LIN54	LIN54_6	ACACCAGCTTTAAATAGTGG	31	16	11	4
GLIS2	GLIS2_1	ACACCATCCAAATAGCGCAG	53	17	18	7
DLX1	DLX1_6	ACACCGCCTTGCCCGACACG	129	67	34	31
NCOA1	NCOA1_2	ACACCTACCTCCAAAAGAAG	74	47	37	12
ZNF329	ZNF329_2	ACACCTGGGAGAGCAACCCA	135	78	49	13
HOXD9	HOXD9_2	ACACGAGGCGAACTCGGCGG	58	33	22	12
ZNF665	ZNF665_4	ACACGGATTTGCCACCAAAG	121	45	23	8
ZNF668	ZNF668_1	ACACGGGCTGCATGAAGCGG	67	50	21	20
ETV7	ETV7_1	ACACGTAATCCCACAGCAGG	58	46	26	12
CEBPG	CEBPG_3	ACACTAATTCCGTTCACCCC	88	55	24	9
FOXN1	FOXN1_1	ACACTATCAGTACCAGCGAA	35	51	10	15
ZSCAN5B	ZSCAN5B_7	ACACTCTCATGGGGTCAGGG	131	96	41	11
ZNF560	ZNF560_4	ACACTGCCAAGAGTTCTCCA	220	45	88	9
YBX3	YBX3_1	ACACTGCGCAGATATTTCCG	117	80	34	15
ZNF17	ZNF17_7	ACACTGTCATTCACAAACGA	126	69	40	2
ZNF277	ZNF277_2	ACACTTACCAAATGGAGCAG	76	30	21	14
ZNF654	ZNF654_6	ACACTTACTGCTTCTAGTGA	58	20	17	18
LHX2	LHX2_2	ACACTTCAACCATGCCGACG	35	53	21	29
ZNF660	ZNF660_7	ACACTTGAGAACCCACACTA	145	48	36	19
BATF	BATF_3	ACAGAACGCGGCTCTACGCA	54	66	25	15
ZNF385D	ZNF385D_6	ACAGAAGACAGCACATCCAC	70	41	27	23
ESX1	ESX1_2	ACAGAAGCGGAAAACAACGT	88	34	40	7
TEAD2	TEAD2_5	ACAGAATCAACTGCATCTGG	109	21	31	16
ZNF75D	ZNF75D_4	ACAGAATGTCAAACAGGCTC	56	42	24	11
STAT5A	STAT5A_2	ACAGAATGTGCCGGATGCAG	200	48	18	15
ZBTB21	ZBTB21_7	ACAGACAAAACAGGTGGCCG	77	85	33	12
KAT7	KAT7_3	ACAGACAGTTCAGAAAGTGA	13	18	0	4
ZNF792	ZNF792_1	ACAGACTCCGATGGCAGCGG	45	51	24	15
POU4F3	POU4F3_3	ACAGACTCGGCGCATGGCCT	124	35	27	13
TMF1	TMF1_3	ACAGACTGTGTTAGACAAGG	54	60	21	16
NFYC	NFYC_1	ACAGAGAAATGATATCGCCA	34	50	12	18
HOXA7	HOXA7_3	ACAGAGAAGCGGCTACGGGG	56	148	19	43
ZNF711	ZNF711_3	ACAGAGAGTGAGTACACCAG	121	82	32	36
LHX3	LHX3_7	ACAGAGATCCCGCTGTGCGC	74	90	89	28
MXD1	MXD1_1	ACAGAGATGCCTTAAAACGG	41	30	4	4
LHX4	LHX4_7	ACAGAGATTCCCCAGTGCGC	50	34	37	9
FLI1	FLI1_7	ACAGAGCAACGGCCCCAGCC	53	9	8	4
USF3/KIAA2018	USF3/KIAA2018_4	ACAGAGCAAGAATATGATCC	75	58	45	26
PBX4	PBX4_2	ACAGAGCAGGCTTCATCCGA	102	73	30	19
T	T_1	ACAGAGCGCGAACTGCGCGT	78	53	29	8
ZNF114	ZNF114_7	ACAGAGGAACCACACAGGCA	120	66	17	23
TBX6	TBX6_5	ACAGAGGCCTATGGGAGCGG	19	73	12	19
E2F7	E2F7_7	ACAGAGGCGCTTCTGAGCTG	73	50	22	11
ETV6	ETV6_6	ACAGAGGGTAGGACTCCTGG	55	16	11	12
PLSCR1	PLSCR1_4	ACAGAGGGTTTACTTTGCAG	110	67	23	17
NR2C1	NR2C1_3	ACAGATAATTCTCCAGACCA	67	54	31	20
BCL11A	BCL11A_2	ACAGATGATGAACCAGACCA	36	16	11	4
ESR2	ESR2_2	ACAGATGTGATAACTGGCGA	48	56	41	11
TIGD7	TIGD7_6	ACAGATTTCAAAGCTAGCAC	59	36	12	17
ZNF280A	ZNF280A_4	ACAGATTTTACAGACAGCAG	78	36	25	5
ST18	ST18_5	ACAGCAACCGCAACACCCAC	111	70	33	20
ZNF571	ZNF571_5	ACAGCAACTCACGTGGGGCA	58	45	30	6
ZBTB4	ZBTB4_1	ACAGCAATGTACACTCGTGG	76	45	15	10
STAT3	STAT3_2	ACAGCACCGGCCGATGCTGG	52	25	13	14
NCOA1	NCOA1_3	ACAGCACGGAAAAGAGGCGC	81	10	36	5
ZNF385B	ZNF385B_2	ACAGCAGAACTACTGTCCAC	116	84	26	20
NKX3-2	NKX3-2_2	ACAGCAGACAGCGGGAGCCG	75	86	39	11
RORC	RORC_3	ACAGCAGCAACAGGAACCAG	27	18	19	1
ZNF189	ZNF189_6	ACAGCAGGAAGTCTACCCTA	50	48	11	10
RAX	RAX_5	ACAGCATCGAGGCCATCCTG	27	22	11	13
CREB5	CREB5_6	ACAGCCACCCCAGCCCACAG	29	11	19	7
ZNF142	ZNF142_4	ACAGCCAGCCAGTAGCACCG	176	107	59	21
TRERF1	TRERF1_4	ACAGCCCACCAGTGAAACCA	98	137	37	30
DPF3	DPF3_4	ACAGCCCAGAAAGGACCGGA	74	23	27	8
ZNF629	ZNF629_7	ACAGCCCCTTAAGCCGCCGG	32	26	8	7
ERF	ERF_6	ACAGCCGGGCCACCTCATCA	78	44	17	8
FOXJ1	FOXJ1_2	ACAGCCTGACCAGCCTGCAG	63	21	18	11
FEZF2	FEZF2_3	ACAGCCTGGTTGATGACCTG	189	87	61	19
FOXP3	FOXP3_7	ACAGCCTGTTTGCTGTCCGG	152	82	55	28
MLXIPL	MLXIPL_1	ACAGCGACTCGCTGCCCCGG	89	54	38	15
ZNF837	ZNF837_4	ACAGCGAGCGGAGTCCCCGA	43	29	15	13
THAP9	THAP9_6	ACAGCGCTCAAAATGGATCA	48	43	11	6
THRB	THRB_3	ACAGCGGTAGTGATACCCGG	65	20	22	6
KLF16	KLF16_4	ACAGCGGTGGCTCTTGGCGG	58	41	8	6
GSX1	GSX1_3	ACAGCGTAGGGGAAGAGCGG	41	29	12	4
ZNF587	ZNF587_7	ACAGCGTGACTATACATCAG	50	55	9	6
TFAP4	TFAP4_1	ACAGCTCAAGCGCTTCATCC	94	47	30	10
DMBX1	DMBX1_2	ACAGCTCCAGAAGCAGAAGG	45	10	16	12
SIX2	SIX2_7	ACAGCTGCTGCAGCTTGGCG	56	43	22	19
C11orf95	C11orf95_7	ACAGCTGGGATGCACACCTG	58	66	22	11
STAT3	STAT3_4	ACAGCTTCCCAATGGAGCTG	87	46	19	11
SCML4	SCML4_2	ACAGCTTGGCGAGGAAGCGG	46	54	19	12
OSR1	OSR1_2	ACAGCTTGGTCACGTCGAGG	73	33	21	12
SETDB1	SETDB1_2	ACAGCTTGTCAGCAGGAGGG	50	20	18	7
SRY	SRY_3	ACAGCTTTCAGTGCAAAGGA	212	117	74	33
ZNF248	ZNF248_4	ACAGGAACAAGTGTCATTCA	87	76	18	7
TBPL1	TBPL1_7	ACAGGAAGTATCACAGTAAC	45	41	17	15
ZNF432	ZNF432_5	ACAGGAATTGCTGACACTGG	58	26	30	17
ZNF235	ZNF235_6	ACAGGACAGAAAACCTACCA	61	65	32	15
ZNF155	ZNF155_3	ACAGGACAGAAACCTTCCCA	69	40	30	4
PRDM12	PRDM12_4	ACAGGAGCAGAACCTGGAGG	37	41	12	16
FOXM1	FOXM1_3	ACAGGAGTCTAATCAAGCAG	98	77	38	14
ARNT2	ARNT2_3	ACAGGGAACAAGTCCACCGA	35	33	11	7
ZIM3	ZIM3_3	ACAGGGAAGAGTGACCTTCG	82	65	23	15
FOXB1	FOXB1_5	ACAGGGAGAACACGCAGCGC	52	26	14	18
HOXC12	HOXC12_5	ACAGGGAGCACACGTTGTCG	88	49	19	8
ZNF474	ZNF474_5	ACAGGGCAGCAGCTGAGCCT	124	35	21	22
SNAI3	SNAI3_1	ACAGGGTCCCCAACTACCGG	178	107	82	22
ZNF770	ZNF770_4	ACAGGTCAGAAGATTGCTGG	40	35	11	5
ZSCAN4	ZSCAN4_2	ACAGGTCCACGTCCACATGC	121	76	47	13
BCL11B	BCL11B_5	ACAGGTGAGCAGGTCAGGGT	41	47	24	17
ZNF444	ZNF444_3	ACAGGTGGAAAGGAGGACAG	14	8	4	2
TEAD3	TEAD3_7	ACAGGTGGTAGAGAAGGTGG	0	2	4	0
ZNF354B	ZNF354B_3	ACAGGTGTCACTGACATTCG	110	73	30	13
ZNF211	ZNF211_1	ACAGGTTCCCATAGCTACAG	75	56	35	19
ZBTB11	ZBTB11_3	ACAGGTTGACACCAAAGGAG	44	41	18	3
FOXO1	FOXO1_1	ACAGGTTGCCCCACGCGTTG	130	82	42	21
TGIF2	TGIF2_2	ACAGGTTGGTCTGTCCAGAA	69	16	18	7
SATB1	SATB1_6	ACAGGTTTCGACCAACACAG	52	24	30	7
ZNF491	ZNF491_4	ACAGTAACTGGAACGAATGA	40	22	31	17
ZNF654	ZNF654_4	ACAGTAATGAAGTGGAGCAA	57	52	25	8
ATF2	ATF2_4	ACAGTACTTGAGGTTGGTGA	113	68	27	33
ZNF566	ZNF566_3	ACAGTATCTCACCTGAGCCA	27	17	4	3
KLF11	KLF11_1	ACAGTCCCCACAGACAACTG	31	39	21	7
HOXC4	HOXC4_1	ACAGTCCGGAATATTACGGC	52	47	22	8
HOXC9	HOXC9_2	ACAGTCCGGCACCAAACCGC	119	70	37	33
CENPA	CENPA_4	ACAGTCGGCGGAGACAAGGT	27	16	9	8
VDR	VDR_4	ACAGTGATCTGAGCAGGAGG	8	0	8	3
GLI2	GLI2_2	ACAGTGGCGTGGAGATGCCG	46	19	27	10
PBX2	PBX2_4	ACAGTGGGATCCACCTGCAG	52	51	29	17
SREBF1	SREBF1_4	ACAGTGGTGCCAGAGACCAG	24	8	9	7
ZNF516	ZNF516_1	ACAGTGGTGTTTGAGTCCGA	38	11	12	3
NKX1-1	NKX1-1_1	ACAGTGTCGCTGGCCGCGAG	76	27	29	18
BHLHE23	BHLHE23_1	ACAGTGTTTGCAAAGCGCGG	105	51	30	17
JUND	JUND_3	ACAGTTCCTCTACCCCAAGG	57	19	20	7
SIX1	SIX1_7	ACAGTTGCTGCAGTTTGGGG	60	27	21	13
RORB	RORB_4	ACAGTTTCTCTGCCTTGGGC	78	77	28	8
HSFX1	HSFX1_2	ACAGTTTCTGTGGAAAGGGG	54	54	16	8
CBX2	CBX2_4	ACATAACAGCTGGGAGCCGG	83	71	29	20
ZNF397	ZNF397_1	ACATAATCCAGAAAGCGGCG	127	74	39	14
ZNF721	ZNF721_7	ACATAGGAGAGTTCACACTA	64	49	30	12
GTF2B	GTF2B_4	ACATATAGCCCGTAAAGCTG	78	3	19	4
CREBL2	CREBL2_3	ACATATAGCTCTTTCTCGAC	37	20	12	6
ZNF404	ZNF404_4	ACATCAACTCACCCGGGCCA	172	145	44	47
ZNF232	ZNF232_5	ACATCACCCTAAGAGTGGAG	64	44	21	10
TBPL1	TBPL1_5	ACATCACTGTCTGCATCCAT	201	81	57	24
ZFP41	ZFP41_4	ACATCAGAAGACGCACACCG	197	114	90	82
ZKSCAN8	ZKSCAN8_2	ACATCAGCTAGAGAACGGAG	85	39	22	25
ZNF883	ZNF883_6	ACATCAGGGAATTCATTCTG	78	51	23	18
ZFP3	ZFP3_1	ACATCAGGGAGATACAACAG	26	20	21	14
LIN28B	LIN28B_5	ACATCGACTGGAATATCCAA	87	55	50	17
NFATC1	NFATC1_5	ACATCGGGAGGAAGAACACA	120	38	27	10
ZNF354A	ZNF354A_6	ACATCTAAGAACCCATACTG	36	26	9	10
ZNF578	ZNF578_6	ACATCTACGATGGCATGTCA	225	132	59	44
ZNF2	ZNF2_1	ACATCTGATGTCACACACTG	162	130	55	44
TEAD1	TEAD1_1	ACATGGTGGATAGATAGCCA	36	5	5	2
ZNF696	ZNF696_5	ACATGTCCCCTCACCTGCAA	56	35	27	19
ELF1	ELF1_1	ACATGTTCCACAATTACGGC	30	54	15	14
THAP2	THAP2_4	ACATTAACATCAGCTTCCAC	86	52	29	24
ZFP14	ZFP14_7	ACATTAACTTACATGGGCCA	90	33	30	11
ZNF165	ZNF165_5	ACATTACCCAGAGAGTGGAG	37	19	8	8
ZNF559	ZNF559_7	ACATTCTCTGAGGTGTGAGG	34	40	17	12
ZNF28	ZNF28_5	ACATTCTTCTCAACAGGGCA	97	78	20	18
ZNF853	ZNF853_1	ACATTGAAGTTCCAGCACGA	114	71	31	19
NFATC2	NFATC2_1	ACATTGGAAGAAAGAACACG	63	31	19	13
ZNF182	ZNF182_3	ACCAAACCTCATCCTCAAGT	94	52	23	11
MBD4	MBD4_1	ACCAAACTGAGCAGAAGCGA	194	86	47	22
ZNF112	ZNF112_1	ACCAAAGGGTTCATGTGGAA	99	80	35	19
NKX1-1	NKX1-1_2	ACCAACGGCTACAGCAGCGG	184	78	50	38
ZNF454	ZNF454_7	ACCAAGACAGAAGCCTCCAG	76	48	17	11
ZSCAN4	ZSCAN4_6	ACCACAAGAGAAGCAAACAT	79	84	17	25
HINFP	HINFP_3	ACCACACCAAGCTGAAACAG	92	35	26	8
ZNF658	ZNF658_1	ACCACATGAGAACTGACACA	92	34	32	14
EBF2	EBF2_7	ACCACGCCTGGGATGTGCCG	96	26	30	5
ZNF587B	ZNF587B_3	ACCACGTGGTTCGATGGCGG	48	77	38	12
ZNF782	ZNF782_1	ACCAGAACTGATCTTCACAT	100	57	16	17
ZNF543	ZNF543_4	ACCAGAGCTGATCTACCAGT	70	23	15	4
ZNF33B	ZNF33B_5	ACCAGAGGTGATCTTCAGGC	13	26	10	7
E2F6	E2F6_3	ACCAGCGATACATCAAAACG	192	118	57	26
ZBED5	ZBED5_1	ACCAGCTTCATTAGTAGCAC	72	61	39	9
ZNF418	ZNF418_4	ACCATCATAGCAGGGCACTG	78	53	32	16
RORA	RORA_1	ACCATCTCGAGACATCCCTA	80	29	19	7
TCF7L1	TCF7L1_7	ACCATGCCCCAGCTCGGCGG	173	77	63	43
ZFP90	ZFP90_2	ACCATGTCGACCCTGCTCAG	131	68	44	7
HOXA2	HOXA2_6	ACCATTCCCAGCCTGAACCC	101	87	22	19
ZNF626	ZNF626_1	ACCATTGCAATTTAGAGATG	20	16	2	6
ZNF98	ZNF98_4	ACCATTTCTAGGCTTCCAAG	56	37	25	6
ZNF486	ZNF486_2	ACCATTTCTAGGCTTCTAAG	61	15	19	7
ZNF697	ZNF697_6	ACCCACAGGACTCAAGGCAC	38	24	14	16
ZNF316	ZNF316_7	ACCCAGGAGCGACTTAGCCG	14	36	21	14
ZNF43	ZNF43_7	ACCCATAAGATAATTCGCAC	40	36	11	25
LHX5	LHX5_7	ACCCCGTACACCTACTACGG	118	122	49	22
LYL1	LYL1_1	ACCCCTTACAGTGTCTACAT	116	89	37	27
ZNF408	ZNF408_3	ACCCGGAATGGAGGAGGCGG	48	18	11	10
SETBP1	SETBP1_1	ACCCGTTGCTCTATCTTCGT	123	77	21	20
NFE2	NFE2_3	ACCCTGTTCCTGCTCTGCTG	55	64	42	16
SOX1	SOX1_1	ACCGACCTGCACTCGCCCGG	274	203	88	54
TCF3	TCF3_2	ACCGAGGATGGAAGACCCGG	76	31	26	16
ZBTB45	ZBTB45_3	ACCGATGGCGAGGATGGCGA	55	30	13	8
CENPX/STRA13	CENPX/STRA13_6	ACCGCAGAAGCAGCAGTCCG	166	96	62	25
HES7	HES7_5	ACCGCAGCCTGGAAGAGCTG	48	25	16	12
INSM1	INSM1_1	ACCGCCGCTGGCACAAACCG	131	94	55	24
ZNF250	ZNF250_7	ACCGCCTGTGCCCTGCTCAG	59	21	9	8
ZNF568	ZNF568_7	ACCGGATGTGATATTCAAGT	100	75	29	24
LHX1	LHX1_6	ACCGGCGCTCCAAGGAGCGG	59	76	26	7
NR2F6	NR2F6_2	ACCGGGCGTGAAGAGCGCGA	86	70	42	15
ZBTB7A	ZBTB7A_1	ACCGTCAGCACAGCCAACGT	110	108	17	22
ZNF264	ZNF264_5	ACCGTCCACTCACCTGGGCC	258	130	84	35
NR1H4	NR1H4_5	ACCGTGAATGAAGACAGTGA	114	53	52	12
ZSCAN5B	ZSCAN5B_6	ACCGTGGAGTGTCTGACCCA	63	19	20	1
ZHX2	ZHX2_7	ACCGTGTCGGGAGGCCGCGA	99	47	33	18
SPIC	SPIC_1	ACCGTTCTCCAATTATAGAC	49	31	27	5
ATF7	ATF7_2	ACCGTTTGTGTGCAATGCCC	143	102	28	23
ZFP92	ZFP92_7	ACCTATGTGCAATCCTGCGG	192	177	78	32
OSR2	OSR2_4	ACCTATTCCACCCCAAGCAG	68	30	7	3
SNAI2	SNAI2_5	ACCTCCTCCAAGGACCACAG	32	19	13	7
MNX1	MNX1_7	ACCTCCTGGGGAAGTGCCGC	20	24	5	7
ZNF597	ZNF597_6	ACCTCGACTCACCTGGGCCT	185	99	65	38
SNAPC2	SNAPC2_6	ACCTCGCCCAGATAGCGCGC	122	61	39	10
NFIC	NFIC_1	ACCTCGCTCACGCACGAAGT	40	15	6	3
BBX	BBX_1	ACCTCGGCAAACTGAAACAA	88	112	26	4
FOXB2	FOXB2_7	ACCTCGGCCGAAAGCAAGGG	52	22	20	8
MKX	MKX_5	ACCTCGGCCTGAGACACCGG	96	57	46	28
ZNF696	ZNF696_6	ACCTGCAAGGGACTCCATCA	50	40	22	6
NOBOX	NOBOX_1	ACCTGGAAAGGTATCCAGAG	121	46	35	10
ZNF112	ZNF112_2	ACCTGGCAACAAAGTGCAGG	116	46	17	11
BCL6B	BCL6B_4	ACCTGGCCTGGATGAAGCGG	133	81	51	20
SETBP1	SETBP1_5	ACCTGGGAAGGGGATCCCGG	5	8	3	1
THAP7	THAP7_7	ACCTGTGGAAGGAGATGCCG	59	29	9	15
ZNF793	ZNF793_7	ACCTGTGTCATTCAAAGATG	130	69	40	9
ZBTB33	ZBTB33_3	ACCTTCTCACAGTAACGGCA	113	51	28	6
E2F5	E2F5_3	ACCTTCTGGTACACAACTGG	95	24	24	15
ZNF549	ZNF549_4	ACCTTTGAGCTTCATCAAGG	129	73	20	13
ZNF317	ZNF317_1	ACGAACAGGTCCAAATTCTG	125	140	55	18
LTF	LTF_1	ACGAACTCACTATTATGCCG	45	51	28	10
ZNF367	ZNF367_7	ACGAAGCCCCGAGTGCTCGG	159	121	57	18
OVOL2	OVOL2_2	ACGACACCTTCGACCTGAAG	35	18	27	14
ZNF226	ZNF226_5	ACGACAGCAACCCGAAGACA	29	32	9	12
HES6	HES6_5	ACGAGAGCCTGCAGGAGCTG	40	21	22	8
TGIF1	TGIF1_1	ACGAGCCAAAACTGATCCCG	82	49	24	18
GRHL3	GRHL3_4	ACGAGCGGAAGCAGTTCCGG	53	46	16	13
TWIST1	TWIST1_3	ACGAGGAGCTGCAGACGCAG	22	36	9	5
ZNF691	ZNF691_1	ACGCACCAGCAAGATCACCT	122	33	39	20
ZNF575	ZNF575_1	ACGCACCGCTTAGCACACGG	73	54	25	17
NACC2	NACC2_4	ACGCAGGAGCGGCTCTCCAG	73	53	21	18
EGR1	EGR1_1	ACGCCCTTACGCTTGCCCAG	90	55	31	14
NKX6-2	NKX6-2_6	ACGCCGGGCCAGAAGATGGG	53	36	28	22
TCF24	TCF24_1	ACGCGAGTCGCGGATGGCGG	55	61	25	12
THAP7	THAP7_2	ACGCGCGAGACGCGCAACCG	40	33	14	6
ZNF17	ZNF17_5	ACGCGGCACCCACCTCAGTC	104	58	51	18
ZNF180	ZNF180_3	ACGCGGGAAGCTGGAAGCGG	111	26	17	4
LCORL	LCORL_7	ACGCGGGACGCAGATGGACA	69	53	45	20
FOXE3	FOXE3_7	ACGCTGAACAGACGCGCGGG	120	124	58	28
MSX1	MSX1_7	ACGCTGAAGGGCAGGAGCGA	82	38	24	13
TFCP2L1	TFCP2L1_4	ACGCTGACCTACCTCAACCA	120	91	28	23
ZNF749	ZNF749_7	ACGCTGCACGCACCTCGGTC	121	77	52	27
NKX3-1	NKX3-1_3	ACGCTGGCAGAGACCGAGCC	82	45	35	11
HOXA10	HOXA10_7	ACGCTGGCTTGCGGCAGCGG	44	54	15	14
OSR1	OSR1_6	ACGCTGTGCACCTGCATCAG	106	82	26	13
UBP1	UBP1_1	ACGCTTACTTATTTGAACCA	88	59	31	8
ZNF610	ZNF610_1	ACGCTTGACATTCATGGACG	137	68	51	31
ZFP91	ZFP91_3	ACGGACAAGCCCCGATGCCG	56	51	27	19
ZNF644	ZNF644_3	ACGGACTGGAGCTGGCATGG	44	33	17	8
DPF1	DPF1_3	ACGGAGACTCAACATCCTGG	83	25	16	1
HOXC11	HOXC11_3	ACGGAGAGCAGAAGTTGCCC	94	35	21	5
NEUROD2	NEUROD2_1	ACGGCGAAGACGACGAGCCG	41	12	26	15
MXD3	MXD3_5	ACGGCGCAGCAGGCTCAGCG	89	52	46	11
XPA	XPA_3	ACGGCGGCTGCGGCTACTGG	73	52	31	7
NFATC4	NFATC4_6	ACGGCGGGACAGAGCTGGGG	34	34	11	1
ATOH1	ATOH1_7	ACGGCTAGCAGCCAACGCCA	118	80	33	15
ZNF296	ZNF296_6	ACGGGAAGGTCTGCAGGCAG	160	82	59	26
ZNF548	ZNF548_4	ACGGGACACCCACCTCAGTC	346	232	85	66
ZNF791	ZNF791_3	ACGGGAGAGAGACTCTGTGA	38	21	23	13
MAX	MAX_6	ACGGGCTCATCATAATGCAC	17	24	7	16
MLX	MLX_3	ACGGGGCTTGCCTTGACCCA	103	33	30	4
POU4F1	POU4F1_4	ACGGGTACTTGTGCTCAGGG	73	72	32	8
BHLHA15	BHLHA15_3	ACGGGTCCCTGCCGAACCCG	44	111	14	27
ZBTB44	ZBTB44_1	ACGGGTGAATCGCACCCCGC	115	63	55	17
THAP9	THAP9_5	ACGGGTGCTGCAGCCCACTG	24	14	18	3
ZBED9	ZBED9_2	ACGGTATTACTTACACAGTG	75	41	15	8
ATMIN	ATMIN_6	ACGGTCTCTCAGGGCCTCTG	152	129	32	24
HMGN3	HMGN3_5	ACGGTCTGCCAGATTGTCAG	143	65	49	19
ATF7	ATF7_3	ACGTACCTGTCCACAGCCCG	46	31	21	8
DBP	DBP_1	ACGTACTCCACATCGCCGAA	84	44	20	8
ZNF846	ZNF846_5	ACGTAGTCTCATGTCTGGAT	61	43	26	12
TBX22	TBX22_1	ACGTCTATCACAGCTCACAG	59	50	25	10
PRDM12	PRDM12_3	ACGTCTTGGAGAAGATGCCG	49	68	38	16
ZNF814	ZNF814_1	ACGTGGTTCGATGGCTGCCG	174	94	56	30
MBD1	MBD1_1	ACGTTGTGCAAAGACTGTCG	61	75	25	19
CHCHD3	CHCHD3_7	ACTAAAGCAAGCCAAAGAGC	30	24	16	1
BHLHE23	BHLHE23_3	ACTAAGCCACGGCTACGCGG	106	27	39	17
NFYB	NFYB_4	ACTAAGTGAAGAGCTTACAG	44	76	7	19
HOXC9	HOXC9_1	ACTACATGTACGGCTCGCCC	39	42	33	10
ALX4	ALX4_1	ACTACCCAGACGTGTATGCG	82	18	28	8
ZNF287	ZNF287_2	ACTACGATGATAGACTAGAG	55	46	11	21
SP1	SP1_7	ACTACTACCACCAGCAACAT	125	100	43	26
MTERF3	MTERF3_1	ACTACTTGAGCTAGTAGACT	71	153	20	7
ASH1L	ASH1L_7	ACTAGAGACACACATACTGG	106	65	21	14
ZNF107	ZNF107_3	ACTCAAACCTAATTAACCAT	165	76	40	5
THAP12/PRKRIR	THAP12/PRKRIR_6	ACTCAAATTCAATACGTCGG	84	34	15	15
WIZ	WIZ_7	ACTCACCACAGAACTCGCAG	85	56	25	9
ZNF77	ZNF77_7	ACTCACCTCAGATGCCTCTG	137	70	44	19
NFE2	NFE2_1	ACTCACCTGCAGCTCGGTGA	93	36	19	4
SNAI2	SNAI2_1	ACTCACTCGCCCCAAAGATG	211	117	53	34
ZNF772	ZNF772_2	ACTCAGAAGGCTTACCCCTG	80	29	17	7
ZNF594	ZNF594_7	ACTCCAAAGACAAATCACCC	119	25	22	5
ZNF420	ZNF420_3	ACTCCAATTTACCCGAGCCA	76	60	35	18
ZNF747	ZNF747_1	ACTCCACACGCAGCTCCCAG	52	65	26	14
FOXD4L5	FOXD4L5_5	ACTCCAGCCGGGGCTGCAGG	14	34	16	8
ZFP69	ZFP69_1	ACTCCCGACAGCAGAATCCC	97	125	51	54
TSHZ1	TSHZ1_4	ACTCCGAGAAGACCAAGAGG	24	27	13	2
ZNF396	ZNF396_5	ACTCCTAACACAAACTTCAG	130	72	34	28
TSC22D1	TSC22D1_1	ACTCCTAGATCCATCGCCAC	84	42	19	7
ZNF770	ZNF770_2	ACTCCTAGCACGCTTAAGCT	141	72	34	12
GTF2I	GTF2I_1	ACTCCTCATCTTCAACGGGG	43	45	32	10
ATF5	ATF5_5	ACTCCTGGCGACCCTGGGGC	92	51	38	17
TIGD2	TIGD2_1	ACTCGATTTAAGCAGCGCCA	91	67	40	9
ZBTB20	ZBTB20_5	ACTCGGGCCAGGACACGCCG	104	37	35	10
ZNF69	ZNF69_6	ACTCTACAAGGAAGTGATGC	36	35	10	11
ZNF214	ZNF214_5	ACTCTACAGGGAGGTCATGT	81	66	26	27
POU3F4	POU3F4_7	ACTCTGCGGGCATGCAGCAG	65	38	1	5
ZNF562	ZNF562_6	ACTCTGTGAGAATTGTGGAG	61	23	9	10
DR1	DR1_1	ACTCTTCTTCAGGAATGCCA	172	55	48	11
ZSCAN22	ZSCAN22_4	ACTGACAGCACAGCGCTCGG	124	92	54	20
ZNF165	ZNF165_3	ACTGACAGCAGAGCTCCCGG	52	66	17	9
IKZF4	IKZF4_5	ACTGACCTGAGTGTGTGCGG	62	53	43	15
SMAD3	SMAD3_2	ACTGACCTGCGTCCATGCTG	137	51	50	21
LBX1	LBX1_1	ACTGACGCCGTTCAGCATCG	54	53	11	23
ZFP2	ZFP2_3	ACTGAGATGAGAGTATGTGG	54	52	28	14
PHF1	PHF1_2	ACTGATGGGCTGCTATACTT	77	42	31	17
ZNF554	ZNF554_6	ACTGATGTGGGGATTAAAGA	22	20	18	4
MEF2D	MEF2D_6	ACTGCACTCACCAACAGGGC	91	81	37	14
PITX1	PITX1_1	ACTGCAGAGAAGGAGCGCGG	63	38	19	8
SP3	SP3_1	ACTGCAGGCATTAATGCCGA	19	37	8	11
USF3/KIAA2018	USF3/KIAA2018_7	ACTGCCACTAAAGTGCACCA	187	122	52	23
ZSCAN1	ZSCAN1_2	ACTGCCGGAAGCGCAGACGC	72	60	27	11
ZNF383	ZNF383_3	ACTGCCTGGACCCTGTTCAG	67	59	19	20
AKAP8L	AKAP8L_2	ACTGCGGGCCACCATGAGGG	149	29	32	15
ESX1	ESX1_4	ACTGCGTGAACGCGGTGCGG	234	94	59	43
ZNF417	ZNF417_6	ACTGCGTGACTATACATCAG	84	46	45	23
DLX4	DLX4_2	ACTGCGTGTGCTGGAAACGC	31	61	4	9
ZNF143	ZNF143_2	ACTGCTAAATCTCAACAGAG	126	47	22	20
ELK4	ELK4_5	ACTGCTCGTGATCACAAGGG	86	33	17	13
ZNF696	ZNF696_3	ACTGCTCTCTTTAGCACCTG	130	79	30	23
ZXDC	ZXDC_6	ACTGCTGGCTCCAATCAAGG	58	41	11	5
ARNT	ARNT_4	ACTGGCAACACATCCACTGA	51	26	22	8
MBD1	MBD1_6	ACTGGCGCCTGAGACCAGGG	38	28	16	8
SP2	SP2_2	ACTGGGACTCACAGCAGCAG	55	30	30	12
MYF6	MYF6_7	ACTGGGAGCTGCAGGTGCGC	167	105	59	18
TFE3	TFE3_2	ACTGGGGAAGGGAGCCGCGG	49	16	12	17
CRX	CRX_6	ACTGGGGCCACTTAGGGCCA	105	115	25	22
EPAS1	EPAS1_5	ACTGGGGCTGCAGGTTGCGA	75	32	14	15
MYBL2	MYBL2_7	ACTGGGGTGGATGTCAGCGA	56	41	8	11
T	T_5	ACTGGGTCTCAGGGAAGCAG	75	42	31	5
ARGFX	ARGFX_2	ACTGGTAGAACTCTCAGTGA	42	22	9	8
ZNF529	ZNF529_6	ACTGGTGACACTCAGGGATG	53	20	21	3
ZNF565	ZNF565_7	ACTGGTGACATTCAGGGACG	20	2	11	4
ZNF225	ZNF225_1	ACTGTACCGAGAAGTGATGC	24	10	7	8
ZBTB38	ZBTB38_4	ACTGTAGCTGATCACAGAGG	38	22	7	14
ZNF865	ZNF865_5	ACTGTATGGGGAACACGCCA	138	34	11	8
ATF3	ATF3_5	ACTGTCAGCGACAGACCCCT	116	89	21	37
ELF1	ELF1_6	ACTGTCCTCAAAACTTCTGA	97	64	22	17
SNAI1	SNAI1_6	ACTGTCCTCATCTGACAGGG	53	33	15	8
ZFP57	ZFP57_4	ACTGTCTAGATGCCAGCCAG	91	52	31	7
ZNF540	ZNF540_3	ACTGTGACTTACATGGGCCA	39	38	7	1
ZNF711	ZNF711_5	ACTGTGATTCAAGCAGCTGG	117	73	24	15
ZNF488	ZNF488_7	ACTGTGGCTGGAGCATACCC	41	31	16	10
ZNF345	ZNF345_4	ACTGTGGGAAGGCTTATGGG	19	21	6	0
ZNF510	ZNF510_5	ACTGTGGGCCAACTTGCAGA	75	43	21	5
HOXA3	HOXA3_4	ACTGTGGGTGAGTTGAGCAG	6	17	6	5
POU2AF1	POU2AF1_1	ACTGTGGTGTAGGTCGCCAG	73	58	28	7
IRF9	IRF9_4	ACTGTGTCCGCAGGAGGAGG	42	41	20	19
DLX6	DLX6_4	ACTGTGTCTGCTGAAAGCGA	70	40	22	6
ZNF707	ZNF707_2	ACTGTTCCAGGCGAGAGACG	81	23	22	12
HNF4G	HNF4G_3	ACTGTTGAGAGCTCACGCAG	26	36	22	15
NR3C2	NR3C2_4	ACTGTTGTTTGGAATAGCAC	172	42	65	22
ZNF155	ZNF155_1	ACTGTTTACACTTCCCACCC	0	0	0	0
SP9	SP9_1	ACTTACCCCGAGTATAGACG	31	4	7	5
WT1	WT1_6	ACTTCAAGGACTGTGAACGA	106	60	39	16
HOXA11	HOXA11_1	ACTTCAAGTTCGGACAGCGG	88	72	23	27
ZNF480	ZNF480_5	ACTTCACTCTCACCAGACCA	129	31	48	7
ZNF880	ZNF880_4	ACTTCACTCTGCAGATTCCG	111	61	27	20
MYRFL	MYRFL_2	ACTTCAGAGCAGGAGAGCAC	88	35	29	10
THAP8	THAP8_3	ACTTCAGGTTGTGACCGCTC	111	43	33	20
RFX8	RFX8_6	ACTTCAGTCATGCCTAGAGG	130	35	21	12
SP110	SP110_2	ACTTCATGCACCAGAAGCTG	85	19	25	12
ZNF140	ZNF140_7	ACTTCCCTTTTCCCCAGCCA	135	59	18	8
ZNF829	ZNF829_3	ACTTCTACAAGCAGTATCCA	88	91	56	14
ZNF354C	ZNF354C_7	ACTTCTCTTTCCACCATGCA	95	81	15	13
RFX3	RFX3_6	ACTTGCTGTACCACCTGCGT	137	66	44	26
ZNF219	ZNF219_3	ACTTGGCAGCGGAACTCCGG	151	64	50	16
ZNF841	ZNF841_5	ACTTGGCTCACCACAGTCCA	115	47	26	13
ZSCAN23	ZSCAN23_1	ACTTGGGTATAATTTGCGAG	68	92	21	21
MITF	MITF_6	ACTTGGTGGGGTTTTCGAGG	75	30	31	6
PGR	PGR_2	ACTTGTCAGCAAAGAACTGG	22	15	13	6
ATF1	ATF1_3	ACTTGTGCCCAGCAATCAGG	132	71	22	16
ZNF223	ZNF223_7	ACTTTTCCTCCCTTAGAAAG	87	34	15	3
ZNF221	ZNF221_5	ACTTTTCCTTCCCTAAGAAG	31	14	24	6
ZNF394	ZNF394_5	ACTTTTGCCCGTGAAAGTGG	24	19	15	4
ZNF345	ZNF345_5	AGAAAACAGGGATCTCAGGA	83	45	20	13
ZEB2	ZEB2_6	AGAAAACTGGAGGAACGCGA	14	27	8	7
ZNF331	ZNF331_5	AGAAAAGTCTATGGCTACGT	26	30	15	9
NANOGNB	NANOGNB_3	AGAAACAATCAGCTATGCCT	57	31	21	7
GCM1	GCM1_7	AGAAACCAAGTTAGAAGCTG	140	89	51	18
ZMAT1	ZMAT1_7	AGAAAGAAGAACGTAAGCAC	9	0	3	4
ZSCAN16	ZSCAN16_2	AGAAAGACGGGACATACTCA	53	41	22	12
SRCAP	SRCAP_6	AGAAAGAGGAACGGGCCCGG	145	72	41	32
PITX2	PITX2_2	AGAAAGATAAAAGCCAGCAG	32	25	10	6
TMF1	TMF1_4	AGAAAGATGAGCAGATCCGA	59	45	9	8
SP140L	SP140L_5	AGAAAGCCCGGAAGCAAGGA	58	49	37	19
ZNF652	ZNF652_1	AGAAAGTCAGCGTTACACAA	81	62	24	16
EEA1	EEA1_2	AGAAAGTCATAAACAAGCCC	88	31	23	5
ZNF121	ZNF121_5	AGAAAGTGTCTCTCCAGCAG	88	25	34	11
ZNF141	ZNF141_4	AGAAAGTTCATACTGGAGAG	66	44	18	15
MYB	MYB_1	AGAAATACGGTCCGAAACGT	19	66	22	28
ONECUT2	ONECUT2_4	AGAAATCAACACCAAAGAGG	16	16	9	2
ZNF22	ZNF22_1	AGAACAAGCGCAAAACAGGC	80	20	7	5
TBPL1	TBPL1_1	AGAACAATAGACCTCATGCC	109	61	53	13
STAT1	STAT1_1	AGAACACGAGACCAATGGTG	44	36	22	5
CHCHD3	CHCHD3_3	AGAACAGCTGGCTAGACTGG	32	40	8	16
NR1I3	NR1I3_4	AGAACAGTCAGCAAAAGCAT	31	36	14	5
NCOA2	NCOA2_4	AGAACCACCAAACCTGCCCA	320	153	106	39
PHF20	PHF20_1	AGAACCACTCATCATAACGA	115	67	41	16
NR1D2	NR1D2_7	AGAACCCTCACTGTGACAAG	72	42	28	4
TLX2	TLX2_7	AGAACCGACGCACCAAGTGG	18	28	4	9
TLX1	TLX1_4	AGAACCGGCGGACAAAGTGG	151	75	41	20
THRB	THRB_2	AGAACCGGGAGAAAAGACGG	68	29	22	11
PBX3	PBX3_3	AGAACCTCCAGAGGCTGCCG	150	86	37	29
LHX1	LHX1_4	AGAACCTGGGCGCCAAGCGG	102	47	34	20
ZNF770	ZNF770_3	AGAACGACCACAAGGGAAAG	177	93	42	44
ZNF160	ZNF160_2	AGAACGCCGGAATGTGTCAA	99	74	40	19
TFDP2	TFDP2_6	AGAACGGATAAAGCAGAAGC	65	34	16	6
MAZ	MAZ_2	AGAACGGCTACAATCTCCGG	61	33	53	7
TBP	TBP_3	AGAACTGAAAATCAGTGCCG	61	53	17	15
ZNF695	ZNF695_1	AGAACTGATCATCTGTCTGG	69	56	27	8
EBF4	EBF4_1	AGAACTGCCTGAAGAATGCG	18	26	12	4
ZNF500	ZNF500_1	AGAACTGTCCCCCTATCCCG	66	40	21	4
ATF2	ATF2_5	AGAACTTGTAAGCAGCACAT	140	71	43	12
CEBPZ	CEBPZ_3	AGAAGAAAGCCAAATACCAG	59	38	34	25
ZNF33B	ZNF33B_4	AGAAGAACCATGGAGACTGG	129	36	36	14
ZNF207	ZNF207_4	AGAAGAAGCAGCTGAAGCCG	68	33	19	9
L3MBTL1	L3MBTL1_6	AGAAGAAGGAAAGGACCCAG	107	29	19	14
STAT5A	STAT5A_7	AGAAGACCTCATCCTTGGGG	20	19	8	2
NFIL3	NFIL3_7	AGAAGACTCCACAACAGGTG	99	75	18	21
ZNF33A	ZNF33A_4	AGAAGAGCCATGGAAACAGG	45	34	19	8
ZNF334	ZNF334_4	AGAAGAGCCATGGATAGTGG	98	20	26	19
ZNF300	ZNF300_4	AGAAGAGCCATGGATCATAA	30	38	18	12
USF2	USF2_2	AGAAGAGCCCAGCACAACGA	11	167	5	50
ZNF500	ZNF500_7	AGAAGAGCCGGAAGAGCTGG	45	26	14	7
ZNF268	ZNF268_3	AGAAGAGCTGTGTATGGTGC	21	16	9	10
ZNF837	ZNF837_6	AGAAGAGGCCCGAGGAGCCG	89	58	26	16
PURA	PURA_4	AGAAGATTCAAGAGAAGCAG	34	14	6	8
MNT	MNT_6	AGAAGATTGCCACGCAGCAG	50	62	25	19
ZNF793	ZNF793_6	AGAAGCACCATGGATTGGTG	54	28	11	14
ZNF503	ZNF503_3	AGAAGCAGTAAGCACAGCGG	134	97	57	20
MSX1	MSX1_5	AGAAGCCCGAGAGGACCCCG	90	49	32	15
CDX2	CDX2_5	AGAAGCGCAGGAAGGCGCGG	24	12	5	9
SMAD3	SMAD3_1	AGAAGCGCTCCGAATTGGAG	51	46	22	9
PITX2	PITX2_4	AGAAGCGGCAAAGGCGGCAG	52	43	35	18
RORA	RORA_7	AGAAGCTATACAGTATGTGG	65	54	26	10
ZNF268	ZNF268_1	AGAAGCTGTCCGGACCCTGG	138	89	48	28
ZFP82	ZFP82_1	AGAAGCTTAATAGTGCTGAC	88	54	26	22
ATF3	ATF3_6	AGAAGGCACTCACTTTCTGC	97	39	30	23
ZNF398	ZNF398_3	AGAAGGGGAACATAATACAG	33	10	9	0
MECP2	MECP2_5	AGAAGGGTCAGGCTCCGCCC	83	62	23	6
MYBL2	MYBL2_1	AGAAGTATGGCACAAAGCAG	27	11	10	5
MSX1	MSX1_6	AGAAGTCATGTCAGCAGCCG	67	70	33	9
POU2F1	POU2F1_2	AGAATCAACCCACCAAGCAG	35	25	9	2
ISX	ISX_1	AGAATCAGCGAGCCAAGTGG	156	126	42	27
HHEX	HHEX_6	AGAATCGACGCGCTAAATGG	69	44	16	12
HSFY2	HSFY2_5	AGAATCGTCTGTCTTAAGCA	206	111	61	32
ZNF101	ZNF101_4	AGAATCTGTACCAAAACCTG	48	34	20	5
CDC5L	CDC5L_6	AGAATGGTCCAGAGAAGAAG	29	20	6	6
ZHX1	ZHX1_6	AGAATTAACAACTGGGACAG	89	43	18	27
FOXJ1	FOXJ1_6	AGAATTCCTGCAGCCACTGC	142	56	35	18
SOX5	SOX5_1	AGAATTTATAGGGAATCCCG	74	56	19	7
FOXD4L3	FOXD4L3_3	AGAATTTGTCCCCGACCGCG	55	26	8	9
ZSCAN18	ZSCAN18_1	AGACAAATTCCCGGAAACGC	76	56	11	16
ZNF404	ZNF404_2	AGACAACAGAGACCTAAAGT	57	39	14	7
YBX3	YBX3_2	AGACAACGTACATTCCGGGG	70	54	29	8
ZNF234	ZNF234_7	AGACAAGATCCAAAGTGAGG	75	72	35	5
ZNF433	ZNF433_1	AGACACAGGATAATGCACCG	89	73	46	18
ZNF442	ZNF442_1	AGACACATAATAGTACAACG	66	65	37	27
ZNF136	ZNF136_7	AGACACATCAAAGATCACAG	26	24	11	9
ZNF563	ZNF563_4	AGACACATGGTAGTGCAAGG	71	50	35	15
ZNF439	ZNF439_1	AGACACATGGTAGTGCACAG	50	23	11	4
TBX15	TBX15_5	AGACACCTGGATGAGACAGG	39	25	5	9
GLMP	GLMP_1	AGACACCTGTCAGCTAGAGG	48	48	12	10
HNF1A	HNF1A_1	AGACACGCACCTCCGTGACG	140	54	49	19
ZNF562	ZNF562_2	AGACAGCATCAGTGTGCACA	122	70	41	21
ZNF670	ZNF670_1	AGACAGGATGTGCCTATGAA	60	51	23	22
ZNF132	ZNF132_1	AGACAGGGCATTACCAAGTG	6	12	3	3
MEIS3	MEIS3_2	AGACAGTGCCCGCAGTACCA	194	81	26	17
HIVEP1	HIVEP1_4	AGACAGTGGGGAGAGCGAGG	11	13	10	12
ZNF502	ZNF502_3	AGACATCAGAAACTTCACAG	30	35	3	12
ZNF441	ZNF441_5	AGACATGAAAGAACACACAG	37	29	11	5
ZNF813	ZNF813_3	AGACATGAAAGTCATCACAC	86	25	26	8
ZNF705E	ZNF705E_2	AGACATGAGAAAACTCACAC	8	14	2	2
ZNF280C	ZNF280C_3	AGACCCACCATCAAATCCAG	118	63	34	21
HMGA2	HMGA2_5	AGACCCAGGGGAAGACCCAA	110	48	36	15
NFE2L1	NFE2L1_7	AGACCCAGTTCCACAACCTG	134	64	40	25
DBX1	DBX1_1	AGACCCTTCGAAGTAGGGAA	10	24	7	11
BHLHE40	BHLHE40_6	AGACCTACAAATTGCCGCAC	70	63	34	13
ZNF214	ZNF214_7	AGACCTACTGAGAGATTCAA	83	58	37	20
NKX3-2	NKX3-2_4	AGACCTAGAGGAGGAAGCCG	16	8	3	0
TEAD4	TEAD4_7	AGACCTCAACACCAACATCG	212	88	103	28
ETV3L	ETV3L_3	AGACCTCTGGGGATAAGAAG	14	7	4	5
SPI1	SPI1_1	AGACCTGGTGCCCTATGACA	35	36	12	23
GATA1	GATA1_3	AGACGACCACCACGACACTG	101	95	55	13
YBX1	YBX1_1	AGACGCTATCCACGTCGTAG	12	7	12	1
DLX5	DLX5_1	AGACGGATGGTGCATAGCTG	61	28	6	8
ZSCAN1	ZSCAN1_3	AGACTCACCCAGCAAGCCAG	32	26	14	7
ZNF624	ZNF624_3	AGACTCCACTCTTTCCAGAG	50	32	19	12
ZHX1	ZHX1_5	AGACTCCAGTGATGAAACCA	39	34	30	10
ZNF317	ZNF317_7	AGACTCCATCTAAAACCAAG	105	42	18	15
ZNF14	ZNF14_5	AGACTCTGTGAAAGTAGAAG	144	58	22	29
KLF8	KLF8_5	AGACTGCACTACCACTGGGA	114	67	48	25
REST	REST_6	AGACTGCCCCATTACCTGGG	125	57	39	9
ZNF608	ZNF608_5	AGACTGCTGGAAATCGGCGG	126	108	43	17
ZNF827	ZNF827_7	AGACTGGGAGCTAAAAGGGG	38	23	15	3
ZNF688	ZNF688_3	AGACTGGGAGGAGCTCGGAG	50	40	25	12
TTF1	TTF1_4	AGACTGTTCATTCACCAGGG	154	130	62	38
ZNF284	ZNF284_5	AGACTTACTCACCTTGAACA	106	61	29	13
ZFP82	ZFP82_3	AGACTTCTCTCCAGAAGAGT	43	17	16	4
PHF19	PHF19 _5	AGACTTGATGTCCAAACTGA	47	36	12	8
THAP6	THAP6_1	AGACTTGATGTGAATGCAGC	78	30	15	12
ZNF549	ZNF549_6	AGAGAAACACATCAGAAAGG	38	25	16	5
FAM170A	FAM170A_6	AGAGAAACCAGAAGCAAAGG	42	29	3	7
ZFAT	ZFAT_2	AGAGAAGCACATGGAAGAAG	29	42	13	11
HMG20B	HMG20B_7	AGAGAAGCAGCAGTACATGA	15	3	1	5
REST	REST_5	AGAGAAGCAGGCAAAAGCCA	40	47	29	8
GLIS2	GLIS2_6	AGAGAAGCGGGAGAGGACGC	83	33	17	12
ZNF366	ZNF366_7	AGAGACACCTCACCACGCAC	241	145	58	42
ZNF415	ZNF415_2	AGAGACCAACGCGATAGAAG	70	52	23	10
NAIF1	NAIF1_2	AGAGACCACCTATCACACGC	79	47	33	19
ZGPAT	ZGPAT_7	AGAGACCGTTCCTAAAGCAG	90	48	26	7
ZNF496	ZNF496_4	AGAGACGCCGAGAGGACTCG	51	48	25	8
THAP10	THAP10_3	AGAGACGTCAAAACAGGCTG	63	57	21	12
ZNF343	ZNF343_5	AGAGACTGAGTCCAGAGCAG	182	96	83	32
MYNN	MYNN_1	AGAGAGACTGAACAAACAGC	28	8	8	3
HNF1B	HNF1B_4	AGAGAGAGAGGCCTTAGTGG	5	3	1	0
SAFB2	SAFB2_7	AGAGAGAGCGCCAGAGGCAG	19	9	1	2
ZNF135	ZNF135_3	AGAGAGCCTGGCAGTGCCGG	102	73	46	26
HOXD10	HOXD10_7	AGAGAGGAGCTGCCTGGCTG	60	36	25	13
FBXL19	FBXL19_4	AGAGAGGCACCTGAAGAAGG	79	18	16	15
FOXO3	FOXO3_1	AGAGAGGCGCATCATCGTCC	85	42	36	15
FOS	FOS_7	AGAGAGGCTATCCCCGGCCG	146	70	32	18
HESX1	HESX1_1	AGAGAGTTGAGTTGGTATAG	50	76	19	16
VEZF1	VEZF1_4	AGAGATAAGGGGAACCACCG	42	28	32	9
ZNF449	ZNF449_3	AGAGATAGAGACCTGGGTGA	44	14	10	4
ONECUT1	ONECUT1_1	AGAGATCAATACCAAAGAGG	46	13	13	11
ZNF500	ZNF500_5	AGAGATCCTGATTGTGAAGG	69	13	32	5
KLF16	KLF16_5	AGAGATGGCCATGAGCACGT	63	41	38	18
HNF4G	HNF4G_4	AGAGCAACAGGAAAACACTA	40	19	18	15
ZNF675	ZNF675_2	AGAGCAACCCTACAAATGTG	13	4	4	7
ZNF75A	ZNF75A_4	AGAGCAAGGGGAAGAGCCAT	21	24	11	4
NR2F2	NR2F2_5	AGAGCAAGTGGAGAAGCTCA	8	7	4	6
TGIF2LY	TGIF2LY_6	AGAGCACAAGAAGAAGCGCA	213	118	44	25
RBPJL	RBPJL_7	AGAGCACACCACCATTCTGA	76	27	15	17
MYOD1	MYOD1_3	AGAGCACTCGCACTTCCCCG	99	105	26	19
TERB1/CCDC79	TERB1/CCDC79_1	AGAGCACTGGAGGAAAGCAA	4	6	7	1
GATA1	GATA1_5	AGAGCAGGATCCACAAACTG	65	34	20	4
DUXA	DUXA_3	AGAGCAGGGCAAGATTCCTG	58	50	30	22
KAT7	KAT7_2	AGAGCCAAACGATACTCCGC	40	56	6	18
ZNF667	ZNF667_5	AGAGCCAGTAAGAAGACGCC	70	38	19	6
ZNF607	ZNF607_2	AGAGCCATGGATGATTGTGA	12	14	4	4
UNCX	UNCX_4	AGAGCCCGGGCTGCAAGCGG	59	55	23	17
ZNF546	ZNF546_2	AGAGCCCTGGATAGTAATGA	61	32	19	17
NFAT5	NFAT5_7	AGAGCCCTGTAACACAGCAA	136	45	37	16
FOXI1	FOXI1_2	AGAGCCGAGTAGGAATAGGG	24	19	22	6
FEZF1	FEZF1_6	AGAGCCTCGGCTGAAATCCG	149	95	57	16
OLIG1	OLIG1_1	AGAGCGAACTGGCCGCACGG	102	55	31	15
HOXC4	HOXC4_2	AGAGCGACTGTGATTTCTCG	34	68	30	22
ZNF671	ZNF671_4	AGAGCGAGGAGAAGAGCCCT	137	22	18	15
SETBP1	SETBP1_3	AGAGCGCATGGAGCCAGAGG	26	17	19	10
DPF3	DPF3_5	AGAGCGTCCACAGTCTGCGC	94	69	41	20
ZNF232	ZNF232_3	AGAGCTAGTGCAGACTAGGA	64	60	25	17
ZNF628	ZNF628_7	AGAGCTCAGGCACCACGGGC	79	38	21	9
FOXO6	FOXO6_1	AGAGCTCTCGGCGGAACGCG	100	52	27	21
ZNF785	ZNF785_6	AGAGCTCTGCAGCTTTCAGC	98	64	25	11
SP6	SP6_4	AGAGCTGCAGAGCCTCCCGC	31	35	35	11
BARHL1	BARHL1_6	AGAGCTGCCCGGGCTGCAGG	103	72	37	19
STAT4	STAT4_5	AGAGCTGTAGTGTTTACCGA	24	16	3	13
SP8	SP8_2	AGAGCTGTCCGAGAGGGAGG	43	15	3	18
SATB2	SATB2_1	AGAGCTGTGAGAATACCCCA	84	31	19	3
ZNF157	ZNF157_5	AGAGCTGTGGATATTAGAGG	61	39	28	12
MYSM1	MYSM1_2	AGAGCTGTTTGAACAAGGGC	53	22	20	9
NPAS4	NPAS4_4	AGAGCTTGAGGACATCGTAG	36	42	15	10
ZNF484	ZNF484_1	AGAGCTTGCTTATGATGCAG	55	44	13	32
VEZF1	VEZF1_1	AGAGCTTGTGTCGATTGAGA	63	24	30	5
ZNF569	ZNF569_3	AGAGGAAATGACTGAGTCCC	130	71	25	20
ZNF396	ZNF396_6	AGAGGAACCTATGAACAAGA	32	11	8	3
ZNF100	ZNF100_4	AGAGGACACATTCCATACCT	191	137	70	37
ZNF398	ZNF398_7	AGAGGACCAGGCAGGGCCAG	25	31	3	8
KLF11	KLF11_4	AGAGGACTGGAGAACATCCG	44	38	25	9
HKR1	HKR1_3	AGAGGAGAGAAAATGTCCAC	54	38	20	2
ZUFSP	ZUFSP_5	AGAGGAGCACAGTGAAGATA	55	52	35	14
SPIB	SPIB_3	AGAGGAGGAAGACTTACCGT	32	45	11	6
FOXP1	FOXP1_3	AGAGGAGGAGACACATGTCG	140	66	28	19
CSRNP1	CSRNP1_1	AGAGGAGGAGGAGGAGACCG	3	10	10	7
ZNF623	ZNF623_7	AGAGGATCCATACTGGGGAG	74	20	16	9
LEF1	LEF1_6	AGAGGATGGACCGCATGGGA	88	46	27	6
ZNF135	ZNF135_4	AGAGGCAGAGCTGTGGGCGG	65	38	30	4
MESP2	MESP2_4	AGAGGCGCAGACGCAGGCGG	49	7	5	15
NKX6-1	NKX6-1_3	AGAGGCGGACGAGGAAGAGG	7	1	1	2
ZNF397	ZNF397_4	AGAGGGAGTTTGATGACCCA	165	51	31	24
ZNF648	ZNF648_6	AGAGGGCACCGCTGACCCGG	39	17	11	14
IRF3	IRF3_2	AGAGGGCCCCAGGTTTGGGA	105	23	31	7
ISX	ISX_3	AGAGGGCCCCGGAGAAGCTG	22	19	18	14
AKAP8L	AKAP8L_1	AGAGGGCCTTGAAGGCACCG	50	38	17	10
ZNF197	ZNF197_4	AGAGGGCCTTGTGAAGGGGA	14	7	5	2
CAMTA2	CAMTA2_7	AGAGGGGCCAGACATATGGA	42	31	12	5
AC138696.1/ZFP41	AC138696.1/ZFP41_2	AGAGGGGCCATGGATGCTGG	85	69	34	28
DZIP1	DZIP1_6	AGAGGGGCCCGACGTCGCTG	133	80	59	24
KCNIP3	KCNIP3_4	AGAGGGGCTGGACCAGCTGC	109	119	43	25
PRDM1	PRDM1_7	AGAGGGGCTTGGAGTGGTGG	35	29	15	10
MSANTD1	MSANTD1_4	AGAGGGGTGGACTTAGCGGG	165	40	25	16
ZNF503	ZNF503_2	AGAGGGTCCTTACCTCGATG	52	50	27	12
ZNF316	ZNF316_3	AGAGGTAGTGCAGGATGCGC	158	104	52	25
ZNF384	ZNF384_6	AGAGGTCAGGGACAACCTGC	63	17	22	7
FOXQ1	FOXQ1_6	AGAGGTGCAAGCAGGAGGGG	42	7	10	7
CUX1	CUX1_1	AGAGGTGGCTCAGAGAGAGG	2	11	1	3
ZBTB7C	ZBTB7C_7	AGAGGTGTGGAAAGAAGTCC	41	42	6	8
LIN28A	LIN28A_6	AGAGTAAGCTGCACATGGAA	47	26	22	13
ASCL3	ASCL3_1	AGAGTAAGGGGATGACACCG	36	78	19	7
ELF3	ELF3_6	AGAGTACTGGGACTGTCTCG	41	55	14	9
ZNF263	ZNF263_3	AGAGTCACCGAGCTTCAAGC	49	76	43	14
ZNF215	ZNF215_4	AGAGTCATGTGTCTCCACGA	102	58	30	7
TCF7	TCF7_6	AGAGTCCAAGGCAGAGAAGG	50	6	18	6
POU3F4	POU3F4_6	AGAGTCCGCATGGACTAGGG	44	16	19	10
ZBTB24	ZBTB24_3	AGAGTCGATACAGCAAGCGG	31	34	9	11
MITF	MITF_3	AGAGTCTGAAGCAAGAGCAC	53	21	8	6
TBX22	TBX22_2	AGAGTGAAAGAAGGCCTCCA	34	16	10	12
ZFP82	ZFP82_4	AGAGTGGGAATACCTGGACT	142	39	57	18
TFAP2D	TFAP2D_6	AGAGTTCAGAGAGTAGGCGT	25	14	14	13
POU5F2	POU5F2_1	AGAGTTGCAGCAATTGGCCA	63	51	30	21
SON	SON_5	AGAGTTGCCAGAGCAGCCTG	24	28	7	12
ZNF365	ZNF365_1	AGAGTTGGCCCAGAAAACTG	25	20	15	9
SP7	SP7_1	AGAGTTGTTGAGTCCCGCAG	20	30	13	9
SCMH1	SCMH1_2	AGAGTTTCTCCAGGAAGCGG	38	16	28	3
TEAD1	TEAD1_2	AGATACATCAAACTCAGGAC	21	4	7	7
ZNF25	ZNF25_6	AGATACCAGGAAAGCCAAGC	89	39	21	5
TBX1	TBX1_7	AGATAGCGAGAAATATGCCG	32	20	17	6
ELF5	ELF5_4	AGATCAGTCCACGACATCAG	77	49	37	16
ZNF619	ZNF619_4	AGATCCCTGGACACTTGCTG	76	22	21	17
PGR	PGR_3	AGATCCTACAAACACGTCAG	114	44	35	18
ZNF160	ZNF160_5	AGATCCTCTGAGCAGGGTCC	19	16	3	2
TFAP4	TFAP4_2	AGATCGCCAACAGCAACGAG	64	35	13	7
ZIM2	ZIM2_1	AGATCGGGACTCATAAGCCC	206	91	55	32
CENPBD1	CENPBD1_2	AGATCTTGCTATCTCTACAG	45	20	6	8
SP140	SP140_1	AGATGAAGGAGCGGTCTCGG	65	58	24	19
HES4	HES4_1	AGATGACCGTGAGACACCTG	29	29	10	12
PA2G4	PA2G4_4	AGATGAGAAGAAGGCTCGGA	42	34	20	4
SOX15	SOX15_7	AGATGAGGAGGCAGCAGCCG	29	16	11	5
KLF12	KLF12_7	AGATGCTGTCATGGAAACTG	108	60	23	8
NR1D2	NR1D2_4	AGATGGAACAGAAGAGGAGG	15	4	1	0
ZNF497	ZNF497_3	AGATGGAGTCCCCAAGAGGG	55	44	11	6
SPIB	SPIB_1	AGATGGCGTCTTCTATGACC	58	26	22	8
ELF1	ELF1_2	AGATGGGATTCCTGAAGTGA	36	43	14	17
ZNF563	ZNF563_5	AGATGGGCCGAATAAATGCA	85	57	39	14
SMAD4	SMAD4_5	AGATGGGGCTAACAGAGCTG	66	18	16	6
ZZZ3	ZZZ3_7	AGATGGTTCAGGTTCTCCGG	91	60	29	9
PURB	PURB_3	AGATGTGAAGCAGAACGCCA	125	75	42	26
KIN	KIN_5	AGATGTGCCAGAAGCAGTGC	101	40	27	9
TEF	TEF_1	AGATTCGCCATCATATGGGA	37	22	21	6
ZNF528	ZNF528_3	AGCAAACGATCCAGACGGCA	133	77	51	14
EEA1	EEA1_5	AGCAACTCCTATAAACACAG	99	33	16	11
ZNF160	ZNF160_3	AGCAAGAAAACCAAGAACGC	62	40	22	5
ZNF609	ZNF609_7	AGCAAGAAGGAGAGAAGCGA	49	54	17	7
ATF6	ATF6_5	AGCAAGGACTGGCTGAGCAG	146	105	40	18
ZNF645	ZNF645_5	AGCACAGGATAACGACAGCG	96	47	31	12
RFX4	RFX4_6	AGCACAGGCAGCATGTGGGG	24	42	11	6
ZNF782	ZNF782_3	AGCACATGGGCCCTGTTGAG	87	36	26	6
ZIC2	ZIC2_1	AGCACATTCTGCGAGCCGTG	106	65	18	12
ZNF843	ZNF843_1	AGCACCGGCAGATTCACCCA	123	58	37	26
HES1	HES1_4	AGCACCTCCGGAACCTGCAG	177	102	48	25
ZNF396	ZNF396_7	AGCACCTTCAGAAATCACTG	53	43	23	13
IRX4	IRX4_6	AGCACGTGCTGCGAGTCCGG	107	100	34	25
ZNF446	ZNF446_2	AGCAGAACCCTCGGAAGCGG	63	29	25	20
CXXC5	CXXC5_7	AGCAGCACCAATGGCAGCGG	46	6	20	7
ZNF598	ZNF598_1	AGCAGCGGTAGCACACCGGG	75	72	61	21
ZNF212	ZNF212_4	AGCAGGCGCCGACTCCGCCA	127	48	38	40
DNMT1	DNMT1_2	AGCAGGCTTGCCAAGAGCGG	43	42	10	32
ZBTB25	ZBTB25_2	AGCAGGGACACCGAATGGCA	70	35	30	21
SMYD3	SMYD3_7	AGCAGTCCGAGACATCGAGG	45	21	6	3
ZNF717	ZNF717_1	AGCATCAAGGTATTCACACG	71	31	16	11
ZNF286A	ZNF286A_1	AGCATCACATCCCTTTGTGC	118	91	42	24
PBX4	PBX4_1	AGCATGCTCTGAATTGCCAT	74	67	22	16
ZSCAN30	ZSCAN30_5	AGCATGGTAGGCCAAGACTG	55	39	34	13
STAT5B	STAT5B_5	AGCATTGTCCCAGAGAACAG	91	29	36	12
CGGBP1	CGGBP1_3	AGCCAACATCCCACTTGAGA	71	51	9	8
RAX2	RAX2_6	AGCCAAGGTGCACCTACCTG	51	97	26	23
TAL2	TAL2_6	AGCCACACTAAGGAATGTGG	94	52	31	17
ZNF157	ZNF157_4	AGCCACATCCTCGAATGACA	86	46	33	17
ZNF853	ZNF853_7	AGCCACCGAGACCTTCGTGC	149	67	47	16
ZBTB39	ZBTB39_4	AGCCAGCACAAATGCAACAG	81	40	12	11
ZNF146	ZNF146_3	AGCCAGCAGAGAATTTACAG	124	63	38	20
NKX1-2	NKX1-2_5	AGCCAGGAAAAGTTTGGCGG	45	27	17	20
HES1	HES1_2	AGCCAGTGTCAACACGACAC	94	67	32	16
ZNF814	ZNF814_3	AGCCATCAACGAGTTCACGC	129	65	26	22
ZNF417	ZNF417_7	AGCCATCAGCGTGTTCACAC	73	36	27	23
ATF5	ATF5_1	AGCCATCCCAGCCCACTAGC	11	11	3	2
ZNF789	ZNF789_5	AGCCATGTTCCCACCAGCCA	73	36	21	12
ZNF229	ZNF229_3	AGCCATTTCCCAAGATAGGG	17	15	19	10
THYN1	THYN1_7	AGCCCAAACAGACAACATGC	216	60	61	18
ZNF610	ZNF610_7	AGCCCAGAAGAGGAAAGCAA	78	18	18	12
ZNF629	ZNF629_2	AGCCCCAACGATGCTCACAG	104	62	39	26
ZNF768	ZNF768_1	AGCCCCGAAGGGTACCTCAG	53	33	12	7
FOXF2	FOXF2_3	AGCCCGCGGGCATCATGTCG	177	111	57	27
ZNF790	ZNF790_7	AGCCCTCACTCACCTGGGCA	171	149	86	29
FOXD2	FOXD2_2	AGCCGAGGCAGACTTAGCCG	160	102	53	21
KAT7	KAT7_5	AGCCGCCGGCAATGCCGCGA	38	58	16	47
NANOG	NANOG_7	AGCCTACCTGTTTGTAGCTG	81	45	8	13
EVX2	EVX2_3	AGCCTGCATGGAGGCAGCGG	45	73	15	11
SCMH1	SCMH1_3	AGCCTGCTGCAACACCACAG	78	72	33	17
CREB3L2	CREB3L2_5	AGCCTGGATGAGAGGCGCCG	114	78	44	23
THAP11	THAP11_6	AGCCTGTAACTCCGACGCGG	162	67	41	13
ZKSCAN1	ZKSCAN1_5	AGCCTGTGGGGACAGACCCG	31	46	15	6
ZNF234	ZNF234_5	AGCCTTATTCACCTTGAATG	83	53	35	6
ZNF611	ZNF611_1	AGCCTTGAGACACATAAGAT	116	81	24	17
ZNF652	ZNF652_5	AGCGAGTGTTAAATACCCTG	24	33	16	3
ZSCAN2	ZSCAN2_4	AGCGCCGGCAGAGCTCTCGG	129	46	21	13
ZNF394	ZNF394_7	AGCGCCTGGACCCAGCACGG	83	30	31	15
FOXC1	FOXC1_1	AGCGCGATGTAGCTATAGGG	19	11	7	5
FOXF1	FOXF1_4	AGCGCGATGTAGGAATAGGG	67	72	13	28
TLX3	TLX3_3	AGCGCGCTTGGCAGAGGCGG	86	48	25	9
BHLHA9	BHLHA9_5	AGCGCGGATGGCCCATCCCG	51	21	31	6
FOXG1	FOXG1_1	AGCGCGTTGTAGCTGAACGG	62	59	22	9
ZNF549	ZNF549_1	AGCGCTAGTGATTACGCCGC	151	68	25	19
USF2	USF2_1	AGCGGAGGAGCAGACAGCGG	11	29	3	7
CSRNP2	CSRNP2_3	AGCGGCAGAAGCAGCTGCGG	26	58	21	2
ZNF304	ZNF304_7	AGCGGCGGTGCTGATGGACC	121	78	40	22
SNAI2	SNAI2_3	AGCGGTAGTCCACACAGTGA	89	30	16	4
TLX3	TLX3_5	AGCGGTCTTTCACGAAGCGG	105	59	48	21
ZKSCAN8	ZKSCAN8_5	AGCGTAACTGCCTGAAGCGC	8	28	13	13
DLX2	DLX2_6	AGCGTAGGAGGTGTAGGCGG	23	26	11	10
SOX21	SOX21_1	AGCGTCTTGGGCTTGCGCCG	224	126	72	39
FOXN1	FOXN1_2	AGCGTGACGTCAGACTGCGG	75	20	32	17
DBP	DBP_5	AGCGTGCGCTCCCACAGCAG	149	86	76	29
FOXJ1	FOXJ1_1	AGCGTGGCATACGAGTAGGG	24	62	14	19
ZNF48	ZNF48_7	AGCGTGGTTCACCCAGGAGC	85	63	23	24
LBX1	LBX1_6	AGCGTTCTGCAGGCAGCCGA	114	46	28	21
ZNF730	ZNF730_2	AGCGTTGACATTTAGAGATG	82	120	36	15
ZNF3	ZNF3_5	AGCGTTTGGAACCTGCTCAG	78	53	12	14
HES5	HES5_2	AGCTACCTGAAGCACAGCAA	77	38	34	13
ZNF169	ZNF169_1	AGCTATTGAGTTCTGCTCAG	176	139	61	33
ZNF804A	ZNF804A_7	AGCTCCACGCATCTCAGCAA	114	91	37	28
DLX5	DLX5_7	AGCTCCTACCACCAGTACGG	52	41	29	7
ZSCAN18	ZSCAN18_6	AGCTCGCCTGGTAGCAGCAG	87	68	48	5
ZNF225	ZNF225_5	AGCTCTACTCACCTTCAACG	68	35	12	12
ZNF230	ZNF230_7	AGCTCTACTCACCTTGAATG	89	81	32	22
STAT4	STAT4_7	AGCTGCAAGACTGGAAGCGG	80	58	14	13
ZNF229	ZNF229_4	AGCTGCTGGACTCTACCCAG	69	21	23	12
CENPX/STRA13	CENPX/STRA13_5	AGCTGGATCCGGCTTCCGGA	144	91	38	14
GMEB1	GMEB1_2	AGCTGGGTCGGAGAACAACA	74	54	23	14
MECP2	MECP2_6	AGCTTCCGGCACAGCCGGGG	91	92	36	26
NR5A2	NR5A2_6	AGCTTGGATCACCTGAGACA	95	48	37	13
SMYD3	SMYD3_4	AGCTTGGCCAGACCACAAGC	33	30	12	1
ZEB2	ZEB2_5	AGCTTGGCTCACGTGTGGGG	118	92	33	30
STAT5B	STAT5B_6	AGCTTGTATCCACACAGCCA	139	66	47	16
DLX5	DLX5_5	AGCTTTGCCATAGGAAGCCG	20	16	18	5
TET1	TET1_7	AGGAAAACAAGAGGCCCCAG	20	18	8	2
ESR1	ESR1_4	AGGAAAGGCGACAGCTGCGG	115	75	51	19
INSM2	INSM2_4	AGGAAAGGGGTTGACGGCGG	74	38	11	12
ZNF205	ZNF205_6	AGGAAATGCCTTCTAAGCTG	68	43	21	15
CPXCR1	CPXCR1_7	AGGAACAACATCTTCCTGGG	9	20	5	1
ZNF491	ZNF491_2	AGGAACATCAGAACTGACAC	46	21	5	7
CEBPG	CEBPG_2	AGGAACCTGCTGTAAGCCGC	70	49	31	15
POGK	POGK_6	AGGAAGAAGAGATTCAGAGC	143	61	34	16
ZNF32	ZNF32_7	AGGAAGAGTTTCCACACCAG	44	33	14	8
ZNF816	ZNF816_6	AGGAAGATTCATACTGGAGA	108	53	35	21
ZNF266	ZNF266_5	AGGAAGCCACAACGGAGGGG	43	64	13	9
SMYD3	SMYD3_6	AGGAAGCCATCCCGTCAGAG	90	58	18	16
ZSCAN16	ZSCAN16_6	AGGAAGCTGGGAAACCACAA	51	24	16	6
HOXB5	HOXB5_6	AGGAAGCTTCACATCAGCCA	63	48	35	13
ZUFSP	ZUFSP_7	AGGAAGGTTTTGATCCTCAG	27	30	17	5
ZNF365	ZNF365_7	AGGAAGTTCAGAGACGAGAG	81	15	34	22
ZNF439	ZNF439_3	AGGAATATGGACCAAAGCCA	63	55	30	12
ZNF701	ZNF701_4	AGGACAAGGCAATACAGAAG	56	32	5	11
ZNF148	ZNF148_3	AGGACAATGGTTGTAATGGG	75	54	22	7
ZNF668	ZNF668_2	AGGACACGCACTTGTAGCGG	88	82	19	13
BATF2	BATF2_1	AGGACCCCAAGGAGCAACAA	88	46	34	10
TERF1	TERF1_7	AGGACCCGCAACAGCGCAGA	200	99	66	41
PITX2	PITX2_6	AGGACCCGTCTAAGAAGAAG	51	22	28	6
ZXDB	ZXDB_2	AGGACCGATCAACCTAGCGG	80	47	19	12
ATF5	ATF5_3	AGGACCTCATAGGGAGCCAG	26	20	4	1
FOXI3	FOXI3_2	AGGACCTGATGAAGATGGTG	93	36	22	12
NEUROG1	NEUROG1_4	AGGACGACGAGCAGGAGAGG	29	22	6	8
SP8	SP8_1	AGGACGAGGAGCGTTTCCAG	88	40	22	12
NKX2-8	NKX2-8_1	AGGACGCGCAACACCTGCCG	190	40	25	10
HES6	HES6_3	AGGACGGCTGGGAGACGCGA	52	34	17	10
ZNF169	ZNF169_2	AGGACTCCTGACAACCAGGA	128	59	45	19
KLF9	KLF9_2	AGGACTCGACCCAGATTCGG	98	80	62	26
MEIS3	MEIS3_3	AGGACTTGGACCAGGAGCGA	65	52	22	5
ZNF616	ZNF616_4	AGGAGAAAGGTTCCAAACAG	83	49	29	18
CBX2	CBX2_5	AGGAGAACATCCTGGACCCG	43	52	6	15
ZNF432	ZNF432_6	AGGAGAAGAACCATGGACAA	39	37	12	21
ZNF354C	ZNF354C_5	AGGAGAAGATCCCTGCATGG	44	31	8	9
FOSL2	FOSL2_1	AGGAGAAGCGTCGCATCCGG	18	9	4	5
ZNF688	ZNF688_1	AGGAGATGTCCCAAACAGGA	42	41	13	4
LMX1B	LMX1B_5	AGGAGCAGCAGAACTCCCAG	117	49	54	21
MEIS2	MEIS2_5	AGGAGCAGCATATAGTCCAG	16	28	16	6
ZBTB32	ZBTB32_7	AGGAGCCAGAGAAACCCTCA	67	61	19	12
ZNF292	ZNF292_7	AGGAGCTGGAGCTACAGCTG	33	27	10	4
POU1F1	POU1F1_4	AGGAGGAAATCCATGACTCA	80	29	18	22
SNAPC5	SNAPC5_7	AGGAGGAGGAGACGCTGCTG	129	82	42	28
HOXC11	HOXC11_7	AGGAGGAGTAGCTGTTCCGA	65	43	37	15
ZNF552	ZNF552_3	AGGAGGCGTTGTTTGCGAAG	116	47	29	7
ZNF587B	ZNF587B_7	AGGAGGCGTTGTTTGTGAAG	56	40	19	8
ZBTB32	ZBTB32_4	AGGAGGTCTGGCGGGAACAG	47	52	29	14
DRGX	DRGX_1	AGGAGGTGTCACCTCTGCCA	64	58	34	17
ZNF296	ZNF296_4	AGGAGGTGTCCTCGGCGGGG	52	38	17	12
ZNF581	ZNF581_5	AGGAGTCACAGAGGGAGCCA	47	25	18	8
MLX	MLX_1	AGGAGTCCTACAAAGACCGG	28	19	8	5
SCML4	SCML4_4	AGGATCCCGGGGAGAAAGCG	45	32	24	9
ETV3L	ETV3L_5	AGGATCCTGCATAAGACCAA	72	23	21	6
ZNF575	ZNF575_5	AGGATCGGTAGCCCCGGCCG	58	49	13	17
ZNF385B	ZNF385B_5	AGGATCTAAACACAAGACCA	85	41	19	14
BHLHE41	BHLHE41_2	AGGATGAAGCTGGATTCCCG	140	59	46	18
HMGA2	HMGA2_4	AGGATGAGCGCACGCGGTGA	201	106	73	26
GPBP1	GPBP1_7	AGGATGCTGGTCATTAAGAA	59	22	16	8
HIF1A	HIF1A_3	AGGATGCTTGCCAAAAGAGG	62	40	14	23
ZFP3	ZFP3_7	AGGATGTGAAGAAGACATGT	136	50	26	25
IRF8	IRF8_3	AGGATGTGTGACCGGAATGG	53	23	18	14
ZNF709	ZNF709_7	AGGATTTGGAGTCTGACTGA	189	79	35	31
ZNF582	ZNF582_4	AGGCAAAGAGCCCTGGATGG	55	54	12	10
IRF9	IRF9_2	AGGCAAGCAGGACTTCCGGG	81	37	16	12
SOX5	SOX5_7	AGGCAATCATGCGCAACAGG	123	76	52	30
ZNF432	ZNF432_1	AGGCACAGTCGAATCTGTCC	100	81	48	13
ZNF627	ZNF627_5	AGGCACATCAGAGATCACAC	25	11	6	5
ZNF433	ZNF433_2	AGGCACATCAGAGATGACAC	71	42	16	11
IKZF4	IKZF4_1	AGGCACCACACTGGTTGCAA	81	27	36	9
ZNF625	ZNF625_5	AGGCACCACAGAGCTGACAC	104	51	19	16
NRL	NRL_1	AGGCACTGAGCTGTAAGGTG	63	33	23	18
CTCFL	CTCFL_6	AGGCAGAGGTGACACAGGTG	62	27	12	11
VENTX	VENTX_1	AGGCAGATTTGAGGACCCGG	11	18	11	9
ZBTB7C	ZBTB7C_4	AGGCAGCCAGGACGGAGCGG	21	26	7	8
JAZF1	JAZF1_6	AGGCAGCGAGTATGACGAGG	48	55	29	16
RARB	RARB_5	AGGCAGGAGCTGGTTGGCAA	34	20	21	7
NEUROG1	NEUROG1_6	AGGCAGGGGACGCACTGCGG	62	45	20	6
ZNF148	ZNF148_5	AGGCATAAGAGAACTCATAG	62	55	39	14
AEBP2	AEBP2_6	AGGCATATGCTGACACACAG	52	64	35	20
E2F2	E2F2_4	AGGCCAAGAACAACATCCAG	42	34	14	4
ZNF428	ZNF428_4	AGGCCACCTTACCTGGGGAA	49	28	17	8
CUX1	CUX1_5	AGGCCAGCCTCACCAAGCTG	89	55	31	17
ZXDA	ZXDA_3	AGGCCCCATCAACCTAGCGG	37	33	10	4
IKZF1	IKZF1_7	AGGCCCCGCACTGATTGCAC	209	120	45	15
FOXI2	FOXI2_5	AGGCCCGGGACCCGAAGCGT	61	37	24	8
LHX2	LHX2_5	AGGCCGCCAGATCCGCACCG	98	50	25	18
ZNF318	ZNF318_3	AGGCCGGTGGGAAGAGACGG	21	2	10	0
ZSCAN21	ZSCAN21_5	AGGCCTAGGGCCCAGAACTG	0	7	5	4
NR2E3	NR2E3_3	AGGCCTGGCACTGGTTGCGG	69	53	22	17
GLIS3	GLIS3_4	AGGCCTGGTCAACCACATGG	134	134	56	24
ZNF264	ZNF264_3	AGGCCTTACCCAGAGACACC	41	15	34	6
FERD3L	FERD3L_6	AGGCCTTTGACCAGCTGCGG	137	93	68	27
ZNF169	ZNF169_7	AGGCGACGAACCTTGGAGAG	73	50	11	6
KCMF1	KCMF1_2	AGGCGATCCTAATCATGTCA	92	71	43	28
ZNF346	ZNF346_1	AGGCGCAGCAAACCTTACAC	32	29	21	11
TFEB	TFEB_6	AGGCGCAGCAGGAGGAGCAG	6	5	3	0
KLF13	KLF13_7	AGGCGCTGTCCTTACCGTCG	38	31	24	7
ZNF165	ZNF165_2	AGGCGGCTCAGTGCCTCGCG	100	117	47	28
ZNF79	ZNF79_2	AGGCGGGACTCAAATGCTGG	63	22	22	3
ETV3	ETV3_3	AGGCGGGTGAAAATGAAAGC	31	17	2	2
ZNF503	ZNF503_7	AGGCGGTTGGCCTGGCGCAG	71	43	18	16
OVOL1	OVOL1_5	AGGCTCATGTTCAAAGCCAG	73	57	11	15
DUX4	DUX4_1	AGGCTCGCAGGGCCTCGCTT	34	8	5	1
ZNF709	ZNF709_6	AGGCTCTGTGAAAGGAAAGA	52	45	20	6
ZNF175	ZNF175_6	AGGCTGAAGTCTCACATCAG	158	91	32	25
TCF4	TCF4_4	AGGCTGATTCATCCCACTGG	39	27	14	5
DLX6	DLX6_1	AGGCTGGAATAAATGGTCCG	110	56	9	13
FOXJ3	FOXJ3_1	AGGCTGGCATAACTGTATGG	75	19	24	12
TBX20	TBX20_6	AGGCTGGTCAGCTCACCCAG	105	72	53	9
AR	AR_4	AGGCTTCCGCAACTTACACG	70	55	42	20
ZNF133	ZNF133_3	AGGGAAAGAGACCTGGAGAG	34	12	8	9
PHF20	PHF20_4	AGGGAACCCAAAAGAAAACG	23	7	13	2
RBAK	RBAK_1	AGGGAACCCTCACTGTACAT	124	76	31	9
HMGN3	HMGN3_6	AGGGAAGAAGGAGGAAAAGC	62	38	22	3
FOXE3	FOXE3_1	AGGGAAGCCAGAGAACGCGG	50	24	17	7
ARNTL2	ARNTL2_5	AGGGACAAGACCAACAGCTA	79	57	26	17
ZNF710	ZNF710_4	AGGGACACAGACGGACGCCG	29	8	26	1
SOX3	SOX3_3	AGGGACACCCACACAAGCGG	65	34	17	6
ZNF805	ZNF805_2	AGGGAGAACGCTTGAGACCA	103	56	22	18
NFIL3	NFIL3_5	AGGGAGCCAAGAGATGACCG	121	46	25	18
JDP2	JDP2_5	AGGGAGCCTGTGGTCACCGA	68	77	23	22
AHCTF1	AHCTF1_6	AGGGAGGAAGGCGTGAATGA	4	2	1	0
MYBL1	MYBL1_1	AGGGATGGCTCATTGAACGA	92	40	13	15
ZNF420	ZNF420_5	AGGGATTATTTGGAAGCCAA	39	25	13	4
ETV3	ETV3_5	AGGGATTGGAGAGACAGCGA	13	12	4	12
RUNX3	RUNX3_5	AGGGCACCGGCAGAAGCTGG	23	23	10	7
BAZ2A	BAZ2A_2	AGGGCAGCCACCGATGGCAG	110	82	42	27
CENPA	CENPA_7	AGGGCAGCTTCCTTATCAAG	87	133	46	21
FOXD4L1	FOXD4L1_2	AGGGCAGGGGCCCCAAGCAG	14	20	4	5
ETV3L	ETV3L_7	AGGGCCACCAGAGACCTCTG	35	23	14	2
TCF23	TCF23_2	AGGGCCACCAGCCATGCCAG	56	50	16	18
SNAPC2	SNAPC2_4	AGGGCCACTGGAAGAAGCCC	33	26	5	2
ZBTB17	ZBTB17_6	AGGGCCAGCTGAGGTCAAGG	92	68	16	12
CCDC17	CCDC17_5	AGGGCCCCGCGAACACCCTG	74	32	19	15
ZNF574	ZNF574_2	AGGGCCCGGAGGAACAACAG	60	41	30	14
GZF1	GZF1_5	AGGGCCGGAGGAGGAAGAGG	2	3	4	0
KDM5B	KDM5B_2	AGGGCCTCTCCAGTGAGCGG	57	18	12	15
NCOA3	NCOA3_4	AGGGCCTGGTGAAATCCCCA	42	36	11	2
NFXL1	NFXL1_3	AGGGCGAGAGAAGGGGTCGG	54	36	6	6
MYC	MYC_4	AGGGCGAGCAGAGCCCGGAG	29	9	9	3
TCF3	TCF3_3	AGGGCGAGCAGGTGCCACGG	93	30	18	24
ZNF408	ZNF408_2	AGGGCGAGGGAGTAAAGCCA	28	35	4	3
SOX17	SOX17_1	AGGGCGAGTCCCGTATCCGG	28	37	17	9
ATOH8	ATOH8_5	AGGGCGCACAGTGGACTCCG	100	52	20	21
ASCL4	ASCL4_6	AGGGCGGAATGCAACAGCGA	45	32	16	6
FOXI1	FOXI1_5	AGGGCGTGCCCAGCCCTCAG	89	63	37	14
ZNF512	ZNF512_5	AGGGCTCCCTACCTTCAGCC	47	29	21	18
LCORL	LCORL_1	AGGGCTCCGGCACTGAGCGG	126	58	37	14
KLF14	KLF14_7	AGGGCTCCTGGGAGAACTCG	80	43	30	13
EVX2	EVX2_2	AGGGCTGCACAGCCCTACGG	72	27	41	15
TBR1	TBR1_3	AGGGCTGCCGATGGAGAAGG	34	24	21	9
HNF1B	HNF1B_2	AGGGCTGCTAAAATGATCAA	49	13	7	2
IRF5	IRF5_2	AGGGCTTCAGCCGCACGCGG	107	68	16	19
SON	SON_3	AGGGCTTCCAGCACCATCCA	80	51	12	10
PPARG	PPARG_2	AGGGCTTGATATCAAAGGAG	85	33	18	13
ZBTB9	ZBTB9_3	AGGGCTTTCAGTAGAAGCAG	75	24	19	8
KLF10	KLF10_3	AGGGGAAAACCCAGGAGCAG	98	40	44	9
TLX3	TLX3_1	AGGGGAAATTGAGACCGCCA	58	19	18	7
TP73	TP73_3	AGGGGAACTCACCGTCCAGG	54	48	28	14
ZNF79	ZNF79_6	AGGGGATACCAGGAAAGTCC	56	40	29	11
RAX2	RAX2_5	AGGGGCCGGCAACCGAGGGT	38	24	8	4
NR1I2	NR1I2_1	AGGGGCTGACAGAGGAGCAG	49	18	13	9
KIN	KIN_3	AGGGGCTGCAGAAGCTACGC	225	29	59	13
MTF2	MTF2_5	AGGGGTGGTGCACTTAAGAA	16	12	9	4
KLF17	KLF17_5	AGGGTAGCCAGGCCCTTCGG	63	21	21	15
MYC	MYC_2	AGGGTAGGGGAAGACCACCG	24	0	11	0
DLX6	DLX6_2	AGGGTAGTGCGCGCCTGCCA	222	200	99	31
FOSL2	FOSL2_7	AGGGTATGGGTTGGACATGG	73	44	23	9
MECOM	MECOM_5	AGGGTCCATAAAGAAAGGAG	93	50	17	6
ASCL4	ASCL4_3	AGGGTCCCCGGAACGCCCAG	58	22	14	6
IKZF4	IKZF4_3	AGGGTCTCACCGGCAAGGGA	92	40	29	8
TPRX1	TPRX1_1	AGGGTCTCAGCCCCAAGAGG	33	27	22	5
KLF8	KLF8_4	AGGGTCTGGGGAGAAGACTG	12	6	1	2
ZNF157	ZNF157_3	AGGGTGAACATGCCAGCTAA	61	54	36	6
ZFP69	ZFP69_5	AGGGTGATCAGGAGCTGCTG	57	46	27	19
ZKSCAN7	ZKSCAN7_4	AGGGTGATGCAGCTGCACCC	52	46	27	14
JDP2	JDP2_2	AGGGTGCAATCATGGCCCCG	105	92	30	26
MYCL	MYCL_5	AGGGTGCACCGGAGACGAAG	17	32	12	5
MLXIPL	MLXIPL_2	AGGGTGCTGGATACAAGTGG	36	12	6	8
LYL1	LYL1_3	AGGGTGGAGAGTTGCAGCAG	57	18	17	6
ZSCAN20	ZSCAN20_2	AGGGTGGCGTGCCTGCACCC	69	40	30	24
ZNF76	ZNF76_4	AGGGTGGTGAATGTAGGCAG	43	23	30	7
CPXCR1	CPXCR1_2	AGGGTGTCAGAATACCATGT	64	33	16	3
RAG1	RAG1_6	AGGGTTCATGGTAAACCCAG	56	15	24	6
MYRFL	MYRFL_3	AGGGTTGGGTAGCATGCACC	190	101	65	22
ZNF202	ZNF202_1	AGGGTTTGCAGAAACAACCC	83	65	10	12
CARF	CARF_5	AGGGTTTGCAGTTACAACCA	93	47	29	22
ZNF33B	ZNF33B_3	AGGTAGATCAGAAGTTCCAG	52	22	15	11
DACH2	DACH2_1	AGGTATAACAGCTGCAGCGA	70	57	37	13
ZNF768	ZNF768_6	AGGTATGAACCCCAAAGCCC	89	54	5	11
KLF5	KLF5_5	AGGTCCTCTGGAGGCAGCCG	116	39	49	20
RARA	RARA_7	AGGTCTACGTGCGGAAGCGG	67	44	19	12
PHF21A	PHF21A_2	AGGTCTCTGGCCCACCACAG	107	13	24	5
ZNF665	ZNF665_7	AGGTCTTCAGTCAAAACTCA	102	46	26	11
FOXL1	FOXL1_5	AGGTGCCCCGCGAGAAAGGG	22	11	7	1
ZNF273	ZNF273_5	AGGTGGACCTCTAGGAGCAG	49	22	6	3
ZFP64	ZFP64_7	AGGTGGCACAACGGTGCTGG	72	23	21	9
NEUROG3	NEUROG3_2	AGGTGGGCAGGACACCGCGC	34	46	38	12
E4F1	E4F1_2	AGGTGGTGGGCACATCAAAG	151	54	33	17
NR2F6	NR2F6_5	AGGTGTAGCTGAGGTTGCGG	0	0	0	0
SOHLH1	SOHLH1_3	AGGTGTGCCAGACCCTGGGA	182	85	76	33
CHAMP1	CHAMP1_3	AGGTTCAGGAGAAGAAACAG	6	15	5	14
ZFPM1	ZFPM1_7	AGGTTCCCTCGGAGACATGG	77	47	20	7
SIM1	SIM1_1	AGGTTCCTGGCGAAACACGG	81	49	11	9
GLYR1	GLYR1_5	AGGTTGAGACGACTTCAGCG	56	51	42	20
ZNF687	ZNF687_1	AGGTTGCACCATCACCACCG	80	50	20	14
OSR1	OSR1_4	AGGTTGGCAAAATCAAAGCG	60	25	24	7
LHX6	LHX6_1	AGGTTGGGTACCGTTCTCGG	154	71	21	10
ZNF547	ZNF547_6	AGGTTGTTGCCATGGAGCTG	113	76	45	23
ZNF134	ZNF134_6	AGGTTGTTGGCATGAAGTGA	80	63	14	34
ZNF772	ZNF772_1	AGGTTGTTGGCATGGAATGG	34	40	14	13
ZNF419	ZNF419_5	AGGTTGTTGGCATGGAGCCG	63	43	24	6
SNAPC4	SNAPC4_3	AGGTTTCTGGGTCTTCAGGG	139	50	44	10
TRPS1	TRPS1_5	AGGTTTTGCAACCTCAGAGG	45	31	29	5
ZNF408	ZNF408_5	AGTAAAGCCACGGCAGGAGG	24	35	12	10
CAMTA2	CAMTA2_2	AGTAAGCCCAGACTTCCCCG	128	28	21	8
NCOA1	NCOA1_6	AGTAATTCTAGCAACAGCCA	188	70	38	23
TGIF2LX	TGIF2LX_5	AGTACAAAGGGCTGCCGAGC	37	35	20	21
ZNF800	ZNF800_3	AGTACCGGTTACAGATACAG	117	58	44	19
ZNF182	ZNF182_4	AGTACCTGAACCCACCACAG	128	52	42	24
POU1F1	POU1F1_2	AGTACCTGTAGACATCACAT	203	103	76	45
ZNF493	ZNF493_1	AGTACGGTAGTCAAACCCCC	93	99	42	13
GSX1	GSX1_1	AGTACTGCGAGCCGAAGGGT	32	30	13	5
NR2F6	NR2F6_7	AGTACTGGCACTGGTTCCGG	85	25	33	15
ZNF157	ZNF157_1	AGTACTTACCTGAGTAACCA	101	34	27	15
POU4F2	POU4F2_7	AGTACTTGGGCTCCACGTGC	194	52	68	19
TOPORS	TOPORS_6	AGTAGAAACAAGGACAGGGA	102	37	41	21
CEBPZ	CEBPZ_4	AGTAGAAGATCCGGACGAGG	54	16	21	4
MYSM1	MYSM1_4	AGTAGACATCACAGATGAGG	120	101	44	13
NACC2	NACC2_5	AGTAGAGCTTGGGATGGCAG	43	46	28	11
ZNF442	ZNF442_5	AGTAGCCTTTGAGGATGTGG	75	45	18	20
ZNF579	ZNF579_4	AGTAGGGGAAACGGAAGAGG	20	24	22	11
FOXD4L1	FOXD4L1_4	AGTAGGTGCCCTTGCCTGGG	37	3	13	3
ZNF471	ZNF471_2	AGTAGTAAAAGTCATGCCCC	60	45	21	3
NRF1	NRF1_1	AGTAGTATATTCATCTAACG	15	15	6	4
ZNF250	ZNF250_6	AGTAGTCACTCCACAGGCCC	80	56	23	11
CEBPG	CEBPG_1	AGTATCGGCAACGCCGAGAG	62	37	13	10
ZNF160	ZNF160_7	AGTATGGATTGCCTGATGGG	118	100	43	21
NCOA3	NCOA3_1	AGTATTGCCAGAAGATGCCA	62	29	28	7
NR2F1	NR2F1_2	AGTATTGGCACTGGTTGCGG	48	45	13	13
CGGBP1	CGGBP1_4	AGTCAAAGACTCATACCAAG	90	46	37	8
ZNF639	ZNF639_3	AGTCAACCAGCAAACCCAAG	87	43	24	15
ZNF302	ZNF302_6	AGTCAATCCTCAGTCGCCAC	88	73	26	12
MBD1	MBD1_7	AGTCACAGCCTCCCTTGCGG	131	63	52	27
ZNF84	ZNF84_1	AGTCACATCTCATATCGCAT	77	27	19	8
THRB	THRB_1	AGTCACGCGAAATCAGTGCC	100	45	23	13
E2F1	E2F1_4	AGTCCAAGAACCACATCCAG	33	14	3	4
HOXD9	HOXD9_6	AGTCCACGTAGTAGTTGCTG	45	42	14	15
ATF4	ATF4_1	AGTCCCTCCAACAACAGCAA	116	53	32	13
KLF16	KLF16_7	AGTCCGGGAAGGGACAGCGG	10	15	3	1
TBX21	TBX21_6	AGTCCGGGTGGACGTACAGG	103	69	49	23
ZC3H8	ZC3H8_4	AGTCCGTGGCCGTTTTGCCG	285	104	76	51
ZNF224	ZNF224_5	AGTCCTACCCACCTTGAACG	42	21	22	7
ZNF223	ZNF223_6	AGTCCTACTTACCTTGGACA	80	78	15	9
ZNF35	ZNF35_6	AGTCCTGAAAGCAACTCAGG	105	78	35	17
ZNF275	ZNF275_1	AGTCCTGAATTCAGACAGCA	81	40	17	8
PAX4	PAX4_2	AGTCCTGCGGGCATTACAGG	48	35	11	20
FAM170A	FAM170A_7	AGTCCTTAGAAAAGCAGCCA	137	87	33	20
HINFP	HINFP_4	AGTCGGCAAGGACAACCCGG	128	65	45	18
ZNF446	ZNF446_6	AGTCTCAGGCTCCTCAAGGG	34	13	20	5
MXD3	MXD3_6	AGTCTGAGCGCTCAGAGGAG	24	16	20	2
ZKSCAN4	ZKSCAN4_6	AGTCTGCAGAAGACCAGACG	60	27	19	13
ZNF30	ZNF30_4	AGTCTGGACTCTTCCCAGAG	73	35	29	18
ZNF579	ZNF579_1	AGTCTGGGCACACGAAAGGG	36	15	15	15
TBX5	TBX5_2	AGTCTGGGTGCACGTACAGG	71	43	21	15
SP140L	SP140L_7	AGTCTGTATACACTTTGCCA	128	135	45	41
ZSCAN23	ZSCAN23_7	AGTCTTTGAAGAGCCTCCCG	78	68	26	32
ZNF507	ZNF507_6	AGTGAACTGAGTATCCACAA	123	48	23	10
ATF4	ATF4_7	AGTGAAGTGGATATCACTGA	45	15	16	10
GATAD2A	GATAD2A_4	AGTGAATGGGCTGACCACGG	99	73	42	38
ST18	ST18_2	AGTGACAGGACAGAGGACGA	81	35	23	17
NFIC	NFIC_6	AGTGACGCTGAACACGCCGG	74	68	26	21
ATF3	ATF3_4	AGTGACTGATTCCAGCGCAG	85	45	24	14
ALX1	ALX1_7	AGTGACTTTTACATGGGCGC	62	24	22	17
ZFX	ZFX_6	AGTGAGCCTGAGAATGATCA	57	54	22	10
HIC2	HIC2_6	AGTGAGGTGGGGACCTGGGG	24	27	12	5
IKZF3	IKZF3_3	AGTGATCAACAAGGAAGGGG	89	54	21	7
FOXN3	FOXN3_4	AGTGATCCAAAATGGAGCGC	41	42	27	5
TGIF2	TGIF2_5	AGTGATCTAGGTGAGGACGA	67	38	17	11
ZNF296	ZNF296_2	AGTGATGGCCTCCAACGGGA	44	50	21	11
DMRT1	DMRT1_1	AGTGCAACCTGATCGCCGAG	44	57	35	21
SREBF2	SREBF2_1	AGTGCAACGGTCATTCACCC	52	85	25	20
UBP1	UBP1_6	AGTGCAAGCGAGAATGGCAG	101	63	43	20
GLI1	GLI1_7	AGTGCAGCCAATACAGACAG	50	43	26	20
ZNF691	ZNF691_2	AGTGCCAGGAGAGCTTTCGG	37	40	27	3
ZNF75A	ZNF75A_7	AGTGCCGGAAAATCTCCTAC	69	40	21	17
ZNF540	ZNF540_2	AGTGCCTGGACACTACCCAG	91	55	31	12
ZNF138	ZNF138_3	AGTGCCTGGACACTGCACAG	37	26	7	3
ZNF677	ZNF677_3	AGTGCCTGGACCCTGCCCAG	21	15	4	2
ZNF790	ZNF790_3	AGTGCCTGGACCTGGAACAG	30	34	5	4
ZNF546	ZNF546_5	AGTGCCTGGACGCTGTGCAG	23	29	9	6
ZNF217	ZNF217_1	AGTGCGAACAGAACCTCCCA	101	72	39	26
ESRRB	ESRRB_1	AGTGCGAGATCACCAAACGG	107	69	33	14
NKX2-3	NKX2-3_7	AGTGCGCACCATGGAAGTGC	103	58	37	5
HIC2	HIC2_7	AGTGCGCAGAGCGGGAGCGA	42	42	11	11
RBCK1	RBCK1_1	AGTGCGCCCTGATATGACAG	67	46	36	30
SCML4	SCML4_3	AGTGCGGGGACCACCAGCGG	119	62	40	27
SPDEF	SPDEF_5	AGTGCTCAAGGACATCGAGA	154	45	23	6
PURA	PURA_7	AGTGCTCGATGAAGTCGCCC	183	114	52	25
MTF2	MTF2_3	AGTGCTGCAAATGTAAGCAG	47	25	26	7
PAX5	PAX5_3	AGTGCTGCCTCTCAAACACG	89	50	33	11
HOXC13	HOXC13_1	AGTGCTGGTAGCCTTCGACG	100	36	34	8
FOXP2	FOXP2_3	AGTGCTTTACTAACCTGCAG	77	42	25	21
CARF	CARF_4	AGTGGAAACAAATCAGACCA	113	31	25	13
ZNF534	ZNF534_4	AGTGGAAATGCCTGGACCCT	78	27	11	9
ZNF785	ZNF785_5	AGTGGAGGCGTGGAGCCCGG	75	29	15	5
ZFX	ZFX_5	AGTGGATGGCACTTGCCCTG	134	60	30	6
ZNF177	ZNF177_7	AGTGGCAGTGGACTTTTCCC	137	78	37	24
ZBED3	ZBED3_7	AGTGGCCACACCCCTACAGG	141	122	40	14
ZNF414	ZNF414_5	AGTGGCCAGCATGTCTGGGA	46	38	11	1
PAX2	PAX2_7	AGTGGCGACGCCCAAAGTGG	36	19	19	3
ARNTL2	ARNTL2_3	AGTGGCTCCTGCGATGGCGG	120	67	59	21
PAX4	PAX4_1	AGTGGCTCTGAGACTCCCCG	40	27	9	3
ZFP28	ZFP28_6	AGTGGCTGAACCCCATTCAG	98	43	20	8
ZNF202	ZNF202_3	AGTGGCTGAGACCAGAGAGG	13	7	1	6
THAP6	THAP6_7	AGTGGCTGGAACGGTTTTGA	86	63	51	13
ZNF513	ZNF513_4	AGTGGGACACGAAGGTGCAG	75	17	30	9
ZNF425	ZNF425_2	AGTGGGAGATCCTGGAGAAG	11	16	6	2
PRDM10	PRDM10_6	AGTGGGGACAGCAGACGGGA	127	37	35	10
ZFP42	ZFP42_3	AGTGGGGCTAAGCCCAGGCA	88	40	17	7
CAMTA2	CAMTA2_6	AGTGGGGCTATCAGTGGAGG	22	22	11	4
ZNF469	ZNF469_6	AGTGGGGTGGACACCAGCCC	61	43	24	8
PRDM1	PRDM1_5	AGTGGGGTTGAGCATGGGGT	36	43	12	6
ZNF229	ZNF229_5	AGTGGGTGAGAGGAATCCTC	55	27	26	8
ZNF281	ZNF281_3	AGTGGGTTCCTGAGTGGCGG	79	71	32	15
ZNF692	ZNF692_2	AGTGGTGCCTCCTCAAGGAG	61	38	23	13
NFKB1	NFKB1_4	AGTGGTGCTGGAGCTGGAGG	36	17	8	4
ZBTB33	ZBTB33_7	AGTGGTTCTTGAAGAAGTGT	76	41	50	14
ZNF576	ZNF576_4	AGTGGTTGCAACCGGCAGGG	59	46	26	4
ZNF582	ZNF582_2	AGTGGTTGGCACCTGCTCAG	117	94	27	16
TERB1/CCDC79	TERB1/CCDC79_5	AGTGGTTGTGACGAAGACTG	40	13	11	8
ZNF441	ZNF441_6	AGTGTAACAGGAACAACTGA	46	48	22	22
PAX3	PAX3_7	AGTGTCCACTCCCCTCGGCC	158	77	48	24
SPZ1	SPZ1_5	AGTGTCGGCTAAGCATGAGC	41	36	20	8
ZNF7	ZNF7_5	AGTGTCTGGACCCTGGCCAG	53	21	9	15
PRDM4	PRDM4_5	AGTGTGAATGGAGTCACTGA	65	28	32	13
ZNF791	ZNF791_6	AGTGTGACGAAGAAGACTGC	108	89	38	19
ZNF239	ZNF239_2	AGTGTGATGACTCTTCAAAG	56	27	10	5
FOSL2	FOSL2_3	AGTGTGCAAGATTAGCCCCG	91	53	32	10
MBD3	MBD3_4	AGTGTGCAGGGCGCTGGCGA	90	44	23	10
ZNF761	ZNF761_4	AGTGTGGAAAGACCTTTAGC	50	16	10	4
ZFP3	ZFP3_4	AGTGTGGAAAGGCTTTCAGG	71	65	35	22
ZNF766	ZNF766_4	AGTGTGGATTAACAGATGGG	18	16	10	7
ZNF765	ZNF765_7	AGTGTGGCAAGACCTTCAGC	84	19	30	14
ZNF761	ZNF761_1	AGTGTGGCAAGACCTTCAGT	25	6	4	9
ZNF628	ZNF628_2	AGTGTGGCAAGTCATTCCGG	97	55	28	14
HOXA11	HOXA11_2	AGTGTGGCCGGAAGACGACT	56	66	27	15
CIC	CIC_4	AGTGTGGCTGGGCTCAGGGG	45	41	18	8
ZSCAN26	ZSCAN26_3	AGTGTGGGAAAGCCTTTCAG	40	53	22	6
ZNF226	ZNF226_7	AGTGTGGGAAGAGCTTCAGG	36	13	14	10
NPAS2	NPAS2_7	AGTGTGTTAAAGTGCTGCCG	30	65	23	3
CENPBD1	CENPBD1_1	AGTGTTACGACGATTTGAAG	41	16	12	10
ZSCAN9	ZSCAN9_6	AGTGTTCCCTCACCCAGCCC	169	101	36	15
NFE2L2	NFE2L2_7	AGTTACCTGTAACTCAGGAA	22	10	10	1
ZNF490	ZNF490_7	AGTTCACAGCCACATCCTCA	8	3	1	0
ZNF200	ZNF200_3	AGTTCCGCCAGACTCCAAGC	47	27	18	9
ZNF804B	ZNF804B_2	AGTTCGAGACATCTCAGCAA	80	50	15	10
HOXC10	HOXC10_3	AGTTCGGAGTTACATTGCGA	49	37	20	15
HOXC12	HOXC12_2	AGTTCGTCCCTGCTCAACGA	20	18	3	3
ZNF565	ZNF565_4	AGTTCTAAAAGCCATGGCCC	50	24	23	3
ZNF230	ZNF230_1	AGTTCTCAAGCATCACGTCT	99	47	23	28
ZNF615	ZNF615_4	AGTTCTCCAACATCACGTCC	25	22	8	8
ZNF81	ZNF81_6	AGTTCTCCAACATTACATCC	77	26	14	10
ZNF788	ZNF788_2	AGTTCTGAGGCGCATCCAAA	115	53	48	11
BRF2	BRF2_5	AGTTCTGCCAAGCACAGAGA	80	20	36	18
ZSCAN32	ZSCAN32_1	AGTTGAGTTACCGCAAAGTG	65	19	32	6
CDC5L	CDC5L_2	AGTTGATGCCAACTCAGTGG	90	26	24	5
ZNF613	ZNF613_4	AGTTGGAACAAGGAGAGCCA	20	23	1	7
DACH1	DACH1_5	AGTTGGCCCAGAGGACGCCG	83	97	30	32
ZNF75D	ZNF75D_1	AGTTGGCTGATAGTCTCAAG	48	52	11	12
L3MBTL3	L3MBTL3_7	AGTTGGTACCATCCAAGTGG	41	40	16	7
NEUROD6	NEUROD6_1	AGTTGTCCAGAGCGTCGTTG	223	132	88	49
ZNF324	ZNF324_2	AGTTGTCTAGCATCACGCGG	56	40	9	6
ZNF572	ZNF572_1	AGTTTGAAAAGCCCTTTCAC	20	21	6	2
ZNF324B	ZNF324B_3	AGTTTTCCAGCATCACGTGG	76	44	19	17
ZNF470	ZNF470_5	ATAAAAGGAGGGATGAACAG	14	35	9	13
IRX5	IRX5_1	ATAAAATGACGTGGACGCCG	125	77	30	12
EN1	EN1_2	ATAACGTGTGCAGTACACCC	39	46	24	8
TERB1/CCDC79	TERB1/CCDC79_7	ATAATCTTGAAGAGCACTGG	69	23	24	14
ZFP64	ZFP64_5	ATACAAACTGGACCGTGCTG	107	66	35	21
AHR	AHR_7	ATACAACACAGCTTCTCCAG	210	134	61	36
ZNF580	ZNF580_3	ATACACGGTGCAGCTGGAGG	62	42	16	37
ZNF277	ZNF277_1	ATACACTTAAAGATCACATG	226	119	57	23
ZNF25	ZNF25_4	ATACAGAGTCCTCTGAGCAG	84	38	34	7
NR4A3	NR4A3_6	ATACAGCTCGGAATACACCA	48	25	15	7
ZNF441	ZNF441_7	ATACATGAAAGACCTCAGCA	99	44	15	10
L3MBTL3	L3MBTL3_1	ATACCAACTCGAAAGCCCGA	49	57	25	11
ZNF346	ZNF346_7	ATACCTAGCAATCCATGGAA	11	2	6	1
FOXD4L4	FOXD4L4_1	ATACCTCAGCAGCGCCGACG	73	26	16	17
FOXD4L6	FOXD4L6_2	ATACCTCAGCAGGGCCGACG	174	148	74	54
THAP9	THAP9_4	ATACGCACTGGTGGAAGGAG	60	32	18	13
MSANTD1	MSANTD1_5	ATACGGGAAGTACAGAGGGG	45	18	9	7
PLAGL2	PLAGL2_2	ATACTCGTAAGGATGTACGG	54	27	16	6
ZNF479	ZNF479_2	ATACTGGAGAGAAACCCTGC	139	52	25	16
HOXC6	HOXC6_6	ATACTGGCTTTCTGGTCCTG	48	83	21	14
SIX3	SIX3_1	ATACTTCTGGCGAGTAGCGG	46	29	21	3
ARID3A	ARID3A_1	ATAGACAGCAACCGACGGGA	67	57	33	42
ARID3C	ARID3C_4	ATAGACAGCAATCGGCGCGA	96	53	34	6
SETDB2	SETDB2_1	ATAGAGAAGAAACTCCACCA	126	51	28	13
ZNF311	ZNF311_4	ATAGAGATGCCTTTGAGCGT	64	41	37	7
GRHL1	GRHL1_3	ATAGAGCAGGCCCAGCGCAG	113	45	27	18
CPXCR1	CPXCR1_5	ATAGATCAAGATCCCACTCA	73	42	25	3
FOXD4L6	FOXD4L6_4	ATAGCAGCAGCATCAGGAGG	49	42	25	18
ARNTL2	ARNTL2_1	ATAGCCAAACTGAAAAGCGG	72	54	26	7
HOXB7	HOXB7_2	ATAGCCGGCCGCGTAGACGC	65	31	19	34
FOXM1	FOXM1_1	ATAGCCTATCCAACATCCAG	42	23	12	3
IRX1	IRX1_6	ATAGCGACCGGCGGCTGCGG	111	75	25	28
ZNF841	ZNF841_3	ATAGCGAGGAACCCAAACTG	39	30	15	15
HOXC4	HOXC4_7	ATAGCTGCACCAGTCTCCAG	30	24	9	8
ZNF563	ZNF563_2	ATAGGAACTGGAATCAGGCA	64	6	14	1
KLF5	KLF5_6	ATAGGAACTGGAGGAAGCTG	21	3	10	0
ZNF44	ZNF44_7	ATAGGAACTGTAAACAGGGA	29	23	13	10
MTERF4	MTERF4_1	ATAGGCAGTTTCAATAACTG	79	92	30	18
ZNF668	ZNF668_7	ATAGGGCCTAGGCTTGGCCG	55	49	4	17
NR4A1	NR4A1_5	ATAGTAGTCAGAGCCACTGG	59	38	25	10
THRB	THRB_5	ATAGTCAATGCCCCAGAAGG	51	35	13	8
NR6A1	NR6A1_7	ATAGTGACCACAGTTCCCCT	160	135	48	28
MBD6	MBD6_3	ATAGTGGCTGAAGACACTGG	48	40	23	6
ZNF611	ZNF611_6	ATATAAGGGATGAGCAGTGA	104	46	35	6
ZNF844	ZNF844_2	ATATATGCTGAGACAAGGGC	65	49	14	14
ZNF585A	ZNF585A_2	ATATCAAGTTCCTGAAGCAG	81	54	33	22
ZFP90	ZFP90_4	ATATCAAGTTTCCAAGCCAG	105	31	23	6
ZNF705G	ZNF705G_1	ATATCATGTGTGTTTTCTTA	113	56	30	14
ZNF589	ZNF589_5	ATATCTAGGCTTCTCTTCCC	67	36	23	16
ZFP69B	ZFP69B_7	ATATCTCTCTCCATCAGCCA	177	37	30	7
NFYB	NFYB_2	ATATCTTCCAATAGCAAACG	26	30	4	12
OLIG3	OLIG3_3	ATATGATGCAGAAGATGCCC	68	31	18	9
ZNF716	ZNF716_4	ATATGGAAAATGTGGACAGG	163	101	63	27
ZNF670	ZNF670_3	ATATGGAGAAACCTTCAGCC	72	31	11	7
GTF2I	GTF2I_7	ATATGGTACAGGTACCACTG	33	20	11	10
ZEB2	ZEB2_3	ATATGGTGACACACAAGCCA	12	9	3	4
MTF2	MTF2_2	ATATGTGACAAGTGTGGCCA	125	62	44	18
CENPA	CENPA_1	ATATGTGTTAAATTCACTCG	50	72	16	11
CREBL2	CREBL2_1	ATATGTTTCAGTACAAGCAG	74	38	34	9
ZNF658	ZNF658_2	ATATTGCATTACTAAACCTA	82	68	49	12
ZNF605	ZNF605_7	ATCAAACCTGGCAGAACCCA	57	45	29	12
PAX2	PAX2_6	ATCAAGCCGGGTGTGATCGG	42	15	19	8
SNAPC5	SNAPC5_4	ATCAATCAACCAAACAACCC	118	54	28	16
ETV4	ETV4_1	ATCAATGTACCTCCACACAG	58	47	18	12
SP1	SP1_6	ATCACAAATCGAGGAAGTGG	80	40	29	15
ZNF23	ZNF23_7	ATCACAGCAGGTTTGAGAAG	61	22	23	18
ARNT	ARNT_3	ATCACAGTGAAATTGAACGG	43	11	10	6
ZNF74	ZNF74_7	ATCACATCTGGCTTGTGCAG	73	48	28	6
POU3F2	POU3F2_1	ATCACCGCGCTGTCCCACGG	105	39	41	13
ZNF821	ZNF821_5	ATCAGAGGAAGATGGAGGGG	44	25	11	2
ZNF77	ZNF77_4	ATCAGCACCAAATCCCACAG	107	37	43	13
ZMAT1	ZMAT1_4	ATCAGGATTTCAACCAGAGA	107	49	21	14
ZNF821	ZNF821_2	ATCAGGGAAACATGTCCCGT	86	52	21	15
ZNF428	ZNF428_1	ATCATATTCAGGATCGTCAG	109	67	25	17
DR1	DR1_6	ATCATCATCGTTGCCAGACG	125	62	33	10
NFYC	NFYC_2	ATCATCGCACAGCCTCAGCA	47	89	16	28
EHF	EHF_7	ATCATGATTCTGGAAGGAGG	46	42	9	13
PURA	PURA_5	ATCATGGCGGACCGAGACAG	148	113	57	26
ZNF85	ZNF85_3	ATCATGGTGGCCAAACCCAC	84	47	29	8
MESP1	MESP1_2	ATCCAGGACTCGGAGAGCGG	100	52	29	27
FOXI2	FOXI2_7	ATCCCCTGGCTCATAGCCCG	114	35	20	11
ZNF774	ZNF774_2	ATCCCGAGGGAAAGCCACAC	55	70	16	13
ZNF654	ZNF654_3	ATCCGGACACAACCAAGAGC	116	68	54	27
ZNF391	ZNF391_7	ATCCTCTTTTGAGAACACAG	62	37	28	14
ZNF776	ZNF776_4	ATCGTACAGAAGCAATGCCA	51	39	23	21
ZNF721	ZNF721_6	ATCGTGACAGAGCCTTTGGA	48	52	17	23
FLI1	FLI1_6	ATCGTGAGGATTGGTCGGTG	67	28	10	11
ZNF471	ZNF471_1	ATCTCACTCGTCATCTCCCA	94	64	41	26
ZNF784	ZNF784_1	ATCTCGATGAGGTCACTCGG	172	86	33	13
HLX	HLX_1	ATCTCTAGATCCCATTAACG	54	50	16	7
NFYB	NFYB_1	ATCTCTGCAGACTATATTGG	26	26	0	8
ZNF705B	ZNF705B_1	ATCTCTGTACAGCTTTCTTT	113	71	40	9
ZNF233	ZNF233_6	ATCTTGGTACAGCTTTCTCT	74	48	33	15
TCF12	TCF12_6	ATGAAATATCCAGGAACCAG	142	46	36	16
ZNF571	ZNF571_6	ATGAAATGGAATCACTCCAG	115	37	32	16
[truncated: 9,365 more rows]

## Sheet: Raw counts related to Fig 5
gene	gRNAID	Gene	hTF-btm10-b1	hTF-btm10-b3	hTF-btm10-b2	hTF-btm10-b4	DMSO-1	DMSO-2	DMSO-3	DMSO-4
ZNF506	ZNF506_4	AAAAACCTTTAACTATGAAG	0	16	36	43	2	3	5	17
AC008770.3/ZNF700	AC008770.3/ZNF700_1	AAAACCCCAGAAGAAGCTTC	72	114	55	72	21	49	27	38
STAT3	STAT3_6	AAAACCCTCAAGAGTCAAGG	225	62	52	45	3	14	33	29
TLX3	TLX3_7	AAAACCGGAGGACCAAGTGG	54	55	66	29	4	19	14	15
ZNF101	ZNF101_5	AAAACCTGGGGATTAAGCTA	60	19	17	11	0	4	2	3
MSANTD4	MSANTD4_2	AAAACGACGACTGGATATCG	53	41	13	32	0	6	5	22
GTF2IRD2B	GTF2IRD2B_4	AAAACGCAAGATAGACCAGG	70	33	35	44	11	36	21	25
IRF9	IRF9_1	AAAACTCCGGAACTGGGTGG	135	88	67	37	11	28	20	29
TBX18	TBX18_2	AAAACTGGGCGCCGAAGAGG	41	56	31	41	10	31	21	53
FOSB	FOSB_5	AAAACTTACCTGGGAGGCGG	107	82	54	49	9	26	25	30
PRRX1	PRRX1_5	AAAAGAAGAGAAAGCAGCGA	77	8	9	26	1	8	6	18
ZNF331	ZNF331_2	AAAAGACCTGCTACTAGAGA	151	108	68	58	6	24	51	53
ZNF471	ZNF471_3	AAAAGACGAGCCATCACTGA	311	93	105	71	12	58	18	34
TIGD1	TIGD1_1	AAAAGAGTACGACTCACCGA	46	27	70	42	8	6	19	27
ZNF597	ZNF597_4	AAAAGAGTCTTTGGAGGATG	80	48	15	36	3	15	25	17
SHOX	SHOX_2	AAAAGCAAGGACGGTAACGG	115	97	130	61	16	39	48	48
ZNF552	ZNF552_7	AAAAGCCATTACAGCTGTGG	59	23	26	22	5	7	6	10
ZNF804A	ZNF804A_3	AAAAGCTCTGGAAGATCTGA	150	36	34	37	2	16	8	19
TP63	TP63_3	AAAAGCTGAGCACGTCACGG	164	207	209	147	16	58	39	75
ZNF92	ZNF92_7	AAAAGCTGAGGACCAGCTAA	40	73	87	60	13	25	22	25
ZNF732	ZNF732_6	AAAAGGAAGGTGCAGAAAGG	73	67	38	38	18	21	26	16
L3MBTL4	L3MBTL4_2	AAAAGGGTGGGCTGACACCG	141	102	70	60	20	25	29	24
ZNF350	ZNF350_7	AAAAGTCAGTTACCTGGGCC	20	54	57	71	7	20	26	29
LBX2	LBX2_2	AAAAGTGTCGAGGAGGGCGT	193	143	42	50	12	54	36	35
ZNF451	ZNF451_4	AAAAGTTCATTCCGAAGAGG	119	40	62	38	11	11	15	22
ZNF528	ZNF528_1	AAAATAGCAAACGATCCAGA	87	34	30	44	14	27	14	30
ZNF709	ZNF709_3	AAAATCAGGGGAGAAAGCTA	30	24	52	33	4	4	7	13
ZC3H8	ZC3H8_6	AAAATGAAGCGAAAATGGCC	89	45	0	30	9	24	29	8
ZNF805	ZNF805_7	AAAATGAGCCCCAAACATGA	133	73	63	60	16	24	28	75
ZNF460	ZNF460_1	AAAATGAGCCTTGAACACGA	49	64	56	31	13	16	1	12
ZNF728	ZNF728_4	AAAATGATCAGGTCTGGCTT	117	47	39	65	14	34	16	26
ZNF836	ZNF836_4	AAAATGCCAAACAGTGACGC	161	57	28	59	7	36	10	14
TCF7L2	TCF7L2_2	AAAATGCCGCAGCTGAACGG	78	76	21	49	22	29	27	34
HEYL	HEYL_6	AAAATGCTCCATGCCACTGG	151	85	45	45	11	17	28	36
HEY1	HEY1_4	AAAATGCTGCATACGGCAGG	207	139	143	81	20	56	44	43
ZBTB2	ZBTB2_2	AAAATGGATTTGGCCAACCA	57	67	7	9	9	18	10	8
SRY	SRY_5	AAAATGGCCATTCTTCCAGG	92	50	46	34	11	35	9	15
NEUROD6	NEUROD6_4	AAAATGGGTTGCCTAGAAGG	30	37	42	27	7	11	19	14
ZNF205	ZNF205_1	AAAATGTCTGCAGACGGCGG	127	92	151	68	13	33	22	32
ZNF286B	ZNF286B_5	AAAATTGGAGCTCTGGCTGA	45	50	75	27	9	25	14	19
SOX6	SOX6_1	AAAATTGGGATCATGAGCGG	131	70	55	39	10	20	20	29
ZBTB33	ZBTB33_4	AAACAAGGCCAATGAAGAGG	124	72	54	30	8	33	14	20
ZNF586	ZNF586_3	AAACACAGGAATGTTCGCAC	88	77	76	87	19	25	14	32
CASZ1	CASZ1_5	AAACAGACTCCATCACCACG	82	110	91	52	20	40	18	23
ZGLP1	ZGLP1_3	AAACAGCTGAACCCCTGCCG	148	86	95	78	9	23	22	34
REXO4	REXO4_1	AAACAGTTGGGTCAGAGCGA	114	75	54	69	1	12	12	28
ZNF674	ZNF674_6	AAACATCAGAGAAGTCACAC	78	43	56	19	9	11	4	4
ARNTL2	ARNTL2_4	AAACCACAGGAGCAATGCAC	105	78	37	43	12	11	18	21
ZNF92	ZNF92_6	AAACCCTGCAAACATGAATG	250	162	106	65	18	36	16	24
ELK3	ELK3_2	AAACCGACAAGCACGTCACC	174	57	56	81	6	19	23	55
BSX	BSX_3	AAACCGTGCGGGCTTTGCGG	111	37	72	34	7	9	18	31
ZNF823	ZNF823_1	AAACCTCCGAAGACACATGG	117	83	67	51	7	21	27	32
ZNF57	ZNF57_1	AAACCTTGCGAGTCCACATG	77	42	30	8	7	14	1	14
ZNF491	ZNF491_3	AAACGAAGTGGAACAAGTGA	60	58	12	35	13	36	12	17
TAL2	TAL2_7	AAACGGGAGTGGCTGCTCAG	91	95	44	63	7	25	6	18
ZNF280C	ZNF280C_7	AAACTCACTTTTGCTCCAGG	159	111	89	68	14	36	9	36
PHOX2B	PHOX2B_3	AAACTCTTCACGGACCACGG	76	75	30	14	9	14	8	11
ZNF615	ZNF615_6	AAACTGAGACAACTTGAGGA	110	73	85	16	2	9	4	9
ZBED9	ZBED9_1	AAACTGAGGATATCCGAAAG	40	24	34	63	4	13	23	52
CEBPZ	CEBPZ_7	AAACTGGAACAGTTGTCCAG	168	53	57	40	4	7	5	7
NR1D1	NR1D1_4	AAACTGGGAGAAGCCCACCA	68	35	31	37	9	18	10	13
TCF7L2	TCF7L2_4	AAACTTTCGGAGCGAGGCGG	58	94	91	22	2	20	7	30
ZNF727	ZNF727_4	AAAGAAAGACTACCAACGTG	119	94	68	46	4	9	12	30
RBPJ	RBPJ_2	AAAGAACAAATGGAACGCGA	28	58	9	40	4	15	13	27
SMAD9	SMAD9_5	AAAGAAGAAGAAGGGAGCCA	27	21	3	14	5	11	8	21
ZBED6	ZBED6_3	AAAGAAGTGCCACACAATGG	135	120	25	72	18	49	19	29
ZUFSP	ZUFSP_3	AAAGACAACACCCTACAGTG	141	166	73	76	11	76	39	57
ZFP62	ZFP62_1	AAAGACAGAACAGGAAGGTG	38	19	2	15	5	11	1	3
SP100	SP100_4	AAAGACATTTCCATTCCTCG	183	84	28	85	30	103	54	78
ZNF518A	ZNF518A_1	AAAGACTGTAAGCTGTGTAG	238	150	128	104	32	46	46	61
GCM2	GCM2_1	AAAGAGAATTCGAGAATCCG	117	39	12	29	11	2	10	21
PATZ1	PATZ1_4	AAAGAGCATTATATCGGCGC	94	44	74	50	1	9	18	35
SKOR1	SKOR1_4	AAAGAGCCTGGTCCAGGCAG	188	127	111	105	15	44	33	66
L3MBTL4	L3MBTL4_5	AAAGAGCGTTTGGATCAGGA	25	42	36	42	2	7	13	27
PHF20	PHF20_5	AAAGAGGCATGTCCAAACCA	75	101	84	64	9	13	16	21
ZIC1	ZIC1_5	AAAGAGGCTGTGCTGTGCGC	211	145	42	34	14	47	13	18
CREBZF	CREBZF_6	AAAGAGTCCCCGGAAGGCGG	196	189	143	108	28	59	62	66
ZNF136	ZNF136_1	AAAGATCACTACAAACACCG	86	24	18	36	7	16	20	19
BBX	BBX_3	AAAGCAAAAGAATCCGATGG	89	21	0	22	3	2	7	8
ZBTB21	ZBTB21_4	AAAGCACACAACACATTCCC	130	106	82	94	4	24	17	28
ZNF518B	ZNF518B_1	AAAGCACACCCTTCAACACG	113	69	19	46	21	40	7	10
TSHZ1	TSHZ1_6	AAAGCAGCCCGACTCTCCCG	111	119	98	60	7	35	31	35
ZNF865	ZNF865_7	AAAGCAGCGTCAAAGAGGGG	46	56	28	29	10	7	9	9
ZNF14	ZNF14_3	AAAGCAGTGGTGATAACTGA	84	42	33	25	5	22	6	13
MEIS1	MEIS1_6	AAAGCAGTTGGCACAAGACA	24	5	7	4	1	2	0	0
ZEB2	ZEB2_2	AAAGCATCTGGAGTTCCAGG	45	20	59	14	5	5	9	2
ZNF668	ZNF668_4	AAAGCCAGAGACAGAAGCTA	39	34	13	24	7	6	12	13
TTF1	TTF1_1	AAAGCCAGGACTCCTCCTGG	156	90	95	74	8	14	20	24
TMF1	TMF1_2	AAAGCCAGTTCGGAGGACTG	151	61	16	28	10	24	12	9
ZNF699	ZNF699_6	AAAGCCATGAGAGACATTTG	228	79	70	65	14	28	17	25
ZBTB43	ZBTB43_5	AAAGCCCAAGAACTGAGAGA	23	18	20	15	0	8	6	24
ZNF319	ZNF319_6	AAAGCCCTTCAAGCACCTGT	82	101	102	71	9	18	23	40
ZSCAN31	ZSCAN31_7	AAAGCCTTCAGTGCCAGCAA	52	45	18	47	5	22	18	12
ZNF189	ZNF189_5	AAAGCCTTTAGTAGAAGCTC	64	37	29	36	5	18	8	13
ZBTB24	ZBTB24_5	AAAGCGCCCTGGAGGCCCTG	60	44	57	60	8	21	16	12
NFIA	NFIA_5	AAAGCGCCTCAAGTCTGTGG	100	94	46	151	10	29	9	22
BHLHE40	BHLHE40_5	AAAGCGGAGCGAGGACAGCA	59	60	27	16	1	17	0	10
RUNX3	RUNX3_7	AAAGCGGTCAGGGAACGGCT	44	37	46	28	15	7	16	15
ZNF512	ZNF512_1	AAAGCTCAGGTGCATGCGTG	78	40	16	32	9	28	6	19
ZNF667	ZNF667_1	AAAGCTCCTACACGAAAGAG	43	39	37	4	8	8	10	18
NRF1	NRF1_2	AAAGCTGCAAGCCCATCTGG	29	12	16	6	0	0	0	0
STAT1	STAT1_6	AAAGCTGGTGAACCTGCTCC	49	81	57	76	10	40	32	41
ZNF45	ZNF45_6	AAAGCTGTGGATGATGAAGA	46	49	36	35	2	10	21	37
ZNF676	ZNF676_2	AAAGCTTGAGGACCAGGTGA	122	58	39	41	9	20	15	17
ZBTB7B	ZBTB7B_6	AAAGCTTTCCTGCAAACCAA	61	66	42	52	9	19	21	14
ZNF439	ZNF439_4	AAAGGAACCGGAACGAGTGA	78	69	73	47	11	9	10	20
ZNF709	ZNF709_5	AAAGGAACGTGAGCAACTGA	143	39	18	15	4	10	17	14
ZNF44	ZNF44_5	AAAGGAACTGAGAGAACTGA	213	128	164	113	27	53	37	26
ZNF844	ZNF844_7	AAAGGAACTGGAACGATTGA	85	64	38	69	14	27	10	16
ZNF266	ZNF266_7	AAAGGAACTGGAAGAACTGA	114	69	37	55	20	54	18	27
HOXD8	HOXD8_4	AAAGGAAGCCCAAGAGCTGG	170	107	54	151	14	20	50	44
ZNF844	ZNF844_3	AAAGGAATGGAACCATCTGA	111	92	60	56	14	33	17	34
ZNF433	ZNF433_6	AAAGGAATGGGAAGAGCTGA	117	56	30	46	2	7	17	15
AKAP8	AKAP8_6	AAAGGAGAAGAGACAGGACG	47	37	19	50	12	16	17	29
TFDP1	TFDP1_3	AAAGGAGAGAAGAATGGCAA	35	17	34	43	0	2	15	19
MYOD1	MYOD1_6	AAAGGAGCAGAGAGAGCCGT	138	52	40	23	6	12	14	22
BPTF	BPTF_1	AAAGGAGCAGAGCAAAACCG	104	62	56	16	5	7	5	7
ZNF175	ZNF175_5	AAAGGAGCCGCGTGTGGAGG	104	47	53	30	12	12	3	4
ZNF440	ZNF440_4	AAAGGAGGGGCGGTATCTGA	23	36	31	14	9	19	0	3
ZHX1	ZHX1_7	AAAGGATTCCAGGATTGCTT	138	91	75	60	14	37	39	41
RBPJL	RBPJL_6	AAAGGATTGGGAGGCACTGA	252	142	152	125	20	30	41	70
ZNF804B	ZNF804B_7	AAAGGCCCTGGAAGATGTAA	47	42	46	29	11	22	27	41
BARHL2	BARHL2_4	AAAGGCTGCAAACTTTGCGT	103	42	22	38	8	17	19	5
DMRTC2	DMRTC2_5	AAAGGGAACCACTCAGCCAC	91	58	36	18	6	20	12	17
YY2	YY2_5	AAAGGGAAGAAACTTCCTCC	105	143	97	63	9	12	6	6
MBD2	MBD2_3	AAAGGGACCGGCTCCCGCCG	78	81	92	46	10	35	17	14
ZBTB26	ZBTB26_5	AAAGGGCATAATTGTGGAGA	85	41	69	98	10	19	30	40
SKOR1	SKOR1_5	AAAGGGGAGACACGCCCCAG	258	112	53	36	14	23	24	21
PRDM9	PRDM9_1	AAAGGGTCATGCATACAAAG	32	68	84	63	8	25	17	23
ZNF682	ZNF682_2	AAAGGGTGAACACCAGTGAA	109	64	55	53	5	8	24	15
ZNF561	ZNF561_3	AAAGGTAGAAAGGATGGTGG	126	39	7	43	3	15	10	31
KLF7	KLF7_7	AAAGGTCTCTGAGATCCTCC	90	44	44	60	3	12	11	17
NFYB	NFYB_6	AAAGGTGCCATCAAGAGAAA	149	73	81	35	4	12	11	12
ZNF627	ZNF627_7	AAAGTAAGTGGATCGACTGA	61	43	19	44	6	21	6	16
THAP11	THAP11_1	AAAGTAGCGCGCAGACCCGC	104	29	57	18	3	10	6	10
SPDEF	SPDEF_3	AAAGTAGGAGAGGTAGAAGG	76	11	8	0	2	12	3	0
ZNF625	ZNF625_4	AAAGTAGGGGAGATCACTGA	41	32	7	2	7	3	2	0
HSF2	HSF2_2	AAAGTAGTACATATCGACTC	41	47	26	18	5	15	8	2
ZNF347	ZNF347_2	AAAGTCATCCTCACCCAGGG	143	63	73	85	9	39	19	34
KMT2A	KMT2A_6	AAAGTCCGGAAAGACAAGGA	80	20	44	12	0	7	0	1
ZNF488	ZNF488_1	AAAGTCGACCCCAACAAGCG	49	39	15	52	8	25	23	28
ZBTB18	ZBTB18_1	AAAGTCGAGAGTCTCTCCGA	188	113	73	76	9	31	14	44
ZNF180	ZNF180_4	AAAGTCGAGGGAGAAGACAC	104	43	26	18	2	1	13	14
IRF1	IRF1_6	AAAGTCTCCATAGACAGAGG	122	21	11	33	8	17	5	18
GBX1	GBX1_3	AAAGTCTCTGAGAAGTGCGG	221	151	152	78	31	38	22	44
ONECUT2	ONECUT2_6	AAAGTCTGGGCACTTTGCAC	12	44	22	28	13	36	12	19
ZNF562	ZNF562_7	AAAGTCTTCACCTTAACTCC	165	109	119	86	20	47	18	29
ZNF138	ZNF138_4	AAAGTGACACTGAGCAGATA	120	73	65	40	8	27	27	31
ZBED6	ZBED6_1	AAAGTGAGCGTGAAGACCGC	128	65	8	50	11	15	6	11
ZNF267	ZNF267_5	AAAGTGATATCGAGGAGACA	111	87	33	61	9	17	27	33
ZNF557	ZNF557_4	AAAGTGATGACAGAAGAGAG	67	35	10	35	3	8	30	22
NR3C1	NR3C1_2	AAAGTGATGGGAAATGACCT	234	155	162	156	22	52	40	72
ZSCAN16	ZSCAN16_3	AAAGTGCAGTCCTCACAGGA	67	66	28	33	7	23	9	13
ATF3	ATF3_3	AAAGTGCCGAAACAAGAAGA	23	21	16	20	4	12	7	9
ZNF138	ZNF138_5	AAAGTGCTGAAACAAATGGC	44	42	54	27	4	10	6	8
PGR	PGR_4	AAAGTGCTGTCAGGCTGGCA	212	102	55	121	20	22	62	64
MSX1	MSX1_2	AAAGTGGAGGACTCCGCCTT	174	134	153	103	16	40	33	54
HOXB5	HOXB5_4	AAAGTGGCTGGAGGAGGCCG	87	100	98	70	9	21	31	60
SMAD9	SMAD9_2	AAAGTGGGCAGAGAAGGCAG	81	16	21	15	5	9	7	7
NKX2-1	NKX2-1_2	AAAGTGGGCATGGAGGGCGG	41	32	17	42	1	9	0	7
KCMF1	KCMF1_3	AAAGTGGTGCAACAACAACA	97	44	64	23	5	11	7	18
PRDM14	PRDM14_5	AAAGTGTCAGGTCCACAACA	59	61	29	33	6	31	10	22
HOXA9	HOXA9_7	AAAGTGTGAGTGTCAAGCGT	76	45	31	49	12	38	16	14
ZBTB32	ZBTB32_6	AAAGTTCAGGAGCTGGGCAA	63	12	6	36	8	35	7	4
FOXD1	FOXD1_1	AAAGTTCTCGACACTGGACA	155	67	26	53	17	23	21	12
ZNF292	ZNF292_2	AAAGTTGACGACACCTCTCA	178	77	71	51	33	41	25	22
MEF2A	MEF2A_2	AAAGTTGACTGAAAATGGGG	61	39	28	19	2	14	14	10
ATOH1	ATOH1_5	AAAGTTGCAGGTGGCTGCGG	117	76	46	49	21	41	9	8
GPBP1L1	GPBP1L1_4	AAAGTTGCAGTTTGAAGAGG	57	31	14	33	3	10	10	7
GPBP1	GPBP1_5	AAAGTTGCCAACGCCAAATG	13	23	41	16	2	11	4	4
ZNF91	ZNF91_2	AAAGTTTTCCTTACCCAGGA	116	127	131	105	24	33	39	57
TFCP2	TFCP2_1	AAATACAGTGGAGTTCCTGT	80	56	22	30	12	29	16	24
TMF1	TMF1_5	AAATAGGCTGTGTAAACTGG	49	27	29	11	2	7	9	17
FOXB2	FOXB2_2	AAATAGTGTACCATGTGCGG	97	62	86	38	11	19	25	26
ZNF566	ZNF566_7	AAATATCAGAGCCATGGCTC	42	13	18	21	4	7	9	13
ARID5B	ARID5B_4	AAATATGTTTCCACTGACGG	213	93	61	49	13	32	9	28
ZHX3	ZHX3_7	AAATCAACCTGAAGAACCTG	72	93	70	47	15	22	16	23
OTX2	OTX2_3	AAATCAACTTGCCCGAGTCG	201	101	92	73	17	49	22	29
ZNF567	ZNF567_5	AAATCATTCCTTCAAAGGGG	61	70	86	81	9	10	29	44
ZIC5	ZIC5_2	AAATCCGCTAATCTCAGCGC	25	31	69	23	11	23	9	7
SP110	SP110_5	AAATGACCCAGAAGAGCCCC	187	88	120	73	3	14	13	10
ZNF426	ZNF426_7	AAATGCGACTTGAAACCCAG	108	58	61	56	25	29	22	25
JRKL	JRKL_4	AAATGGAGATGAGACTGCGG	130	73	56	45	5	20	18	52
CREB5	CREB5_3	AAATGGGAACATGAACACCA	155	115	76	100	19	55	26	40
ZNF823	ZNF823_5	AAATGGGAGGACCAGAACAT	131	78	38	29	12	21	19	23
ZBTB26	ZBTB26_7	AAATGTACAAGACCTCACAG	81	44	57	47	8	35	7	13
ZNF560	ZNF560_1	AAATTATCTTGCCAAAGGGC	63	25	66	43	6	8	10	9
KLF12	KLF12_5	AAATTCATGGGACTTGAAGG	87	28	38	15	3	28	8	20
POU4F3	POU4F3_5	AAATTCTCCAGTCTGCACTC	205	214	258	232	26	57	41	143
CREB3	CREB3_5	AAATTCTGAAACGTGTGCGG	4	41	6	31	6	7	14	31
ZNF181	ZNF181_5	AAATTGCAGAGTAATGCCTC	88	53	51	80	7	23	26	42
NKX2-3	NKX2-3_1	AAATTGCGTCCCCTCAGCGG	450	221	140	156	21	67	68	81
E2F6	E2F6_6	AACAAAAGGTCTGAAGGTGT	49	38	22	23	5	21	11	25
LMX1A	LMX1A_6	AACAAACTCATTGGGAGCGA	88	33	14	47	7	13	13	23
ZNF574	ZNF574_7	AACAACAGTGGAGAAGCAGG	12	17	39	19	2	8	2	10
ZFP1	ZFP1_2	AACAACTGGACCCCTCTCAG	521	240	188	141	15	43	25	40
NKX3-2	NKX3-2_1	AACAAGAAAGAGGAGCGCGG	200	92	85	101	15	40	28	32
UBP1	UBP1_7	AACAAGAATGTGAATACCGG	121	69	27	29	8	13	8	10
ARHGAP35	ARHGAP35_6	AACAAGAGAGGAGACACCAG	21	9	21	5	1	6	4	4
TFAP2A	TFAP2A_5	AACAAGGACAACCTCTTCGG	138	63	64	25	18	35	24	56
AIRE	AIRE_7	AACAAGGCCCGCAGCAGCAG	142	95	125	70	14	25	16	17
SP3	SP3_6	AACACACTTAAGAGTACAGG	155	57	42	35	1	3	20	24
CLOCK	CLOCK_3	AACACCAACCAAGATCCCGA	75	110	72	74	7	18	11	35
ZNF136	ZNF136_5	AACACCGAGGGAGAAATCTA	122	54	23	26	4	9	6	18
ZNF547	ZNF547_5	AACACTCCACTCACCTGTGC	251	131	49	73	5	52	11	22
DACH2	DACH2_5	AACACTCCCAAAGAACGCTT	257	161	116	211	10	26	35	65
TSC22D1	TSC22D1_6	AACACTGCTAACAGCAGCAG	120	77	53	81	7	33	37	50
MYRFL	MYRFL_1	AACAGACTTGTGTCCAGGGC	122	83	93	96	9	18	37	83
ZNF721	ZNF721_1	AACAGAGAGAAAGCTTACAC	57	87	67	46	10	28	23	20
TIGD6	TIGD6_1	AACAGATTTAGAGATCGCCA	58	57	38	34	19	34	11	13
HSF2	HSF2_1	AACAGGAAACTATTGAGTCC	148	49	28	46	5	20	31	17
REPIN1	REPIN1_5	AACAGGCACACTGGAAGGGG	10	39	32	17	2	9	2	4
FOXK1	FOXK1_1	AACAGGCATTCCGGAAACGG	288	210	153	186	65	113	101	85
CCDC169-SOHLH2	CCDC169-SOHLH2_1	AACAGGTGGATCAACTGCCT	124	116	48	63	10	12	15	25
TOPORS	TOPORS_2	AACAGTACTCCACTATCCGG	70	66	46	66	7	11	10	21
ZNF286A	ZNF286A_6	AACAGTGACATTCAAGGATG	22	22	13	11	0	5	1	3
ZNF790	ZNF790_2	AACATAAACAGTCAAGGCTG	32	102	15	85	10	23	13	13
ZNF804A	ZNF804A_4	AACATCAAGGGAGTTTTCCG	196	88	83	41	19	23	10	34
LHX3	LHX3_4	AACATGAAGCGCTCCCGCGG	54	46	41	60	7	20	25	46
GPBP1	GPBP1_4	AACATGTGCTCCCTTAACTG	69	48	32	43	7	13	8	10
ZNF107	ZNF107_1	AACATGTGGATGAGTGTACG	65	85	72	48	4	15	23	21
ZNF148	ZNF148_6	AACATTGACGACAAACTGGA	65	51	44	38	4	15	18	16
NR1H3	NR1H3_6	AACATTGTAGTGGAAGCCCG	13	24	19	4	9	25	1	0
THAP5	THAP5_4	AACCAAGATACAGGTAGAGG	99	52	30	46	12	21	15	38
FOXP1	FOXP1_6	AACCACCAGCATGCACACGG	105	68	132	94	4	38	53	63
ISL2	ISL2_1	AACCAGACGCGGATGACCCG	106	124	61	53	21	43	22	52
MITF	MITF_4	AACCATCTTAAAAGCATCCG	86	26	55	25	4	32	2	11
ETV2	ETV2_5	AACCCGGGGCTGCATGCGGG	30	17	7	15	1	3	4	10
ZNF599	ZNF599_7	AACCCTCCACTCACCAACGC	0	0	0	0	0	0	0	0
NEUROD6	NEUROD6_7	AACCGAGAAAGAAGAAGAGG	0	6	0	0	0	0	0	0
HOXC8	HOXC8_2	AACCGGCAGTCGTAATAGGC	49	21	2	7	6	13	1	10
USF3/KIAA2018	USF3/KIAA2018_2	AACCGGGAGACACACAATGC	59	45	30	38	7	13	6	6
TBPL1	TBPL1_2	AACCTAGTTTCTGCAGACTA	65	101	46	33	19	44	8	13
ZNF674	ZNF674_7	AACCTCAGTGCAGTGAACAT	114	105	127	57	11	31	39	55
RORB	RORB_1	AACCTGAACAACGAGACCAG	50	57	37	68	5	22	27	33
ZBTB47	ZBTB47_7	AACCTGAAGAAGCTGGGCGG	209	67	101	76	16	28	16	48
ZNF215	ZNF215_2	AACCTGAATTCATTGCGTAA	90	81	73	78	8	27	22	52
ZNF639	ZNF639_6	AACCTGTAGAAAAGGCAGTG	135	87	54	75	12	31	21	31
ZNF101	ZNF101_3	AACCTTCAGGAACCTGGCCT	171	68	12	41	8	24	9	14
ZNF177	ZNF177_6	AACCTTCCAGGAAGTGGCAG	70	51	37	29	4	2	14	41
ZNF558	ZNF558_7	AACCTTCGAGGATGTGGCCG	117	64	80	83	16	42	35	34
NR1I2	NR1I2_4	AACGCAGATGAGGAAGTCGG	185	128	155	106	31	50	29	66
ZNF644	ZNF644_7	AACGCTAATCTTCCACGGAC	79	63	67	32	11	49	6	9
ZNF625	ZNF625_7	AACGCTCGAGGCACATCCAA	84	53	25	18	5	17	15	21
YY1	YY1_4	AACGCTGGTCACCGTGGCGG	205	79	96	36	3	20	11	20
POU4F2	POU4F2_3	AACGCTGGTGGTGGCGGCGG	48	29	53	19	3	5	11	3
SOHLH1	SOHLH1_4	AACGGAGGCCAGGACAGGGG	5	3	19	8	0	3	0	1
RFX7	RFX7_1	AACGGATTCCTGCATTCAAC	151	74	113	80	17	34	38	49
PCGF2	PCGF2_2	AACGGCTCCAATGAGGACCG	56	35	23	31	1	14	15	30
PAX6	PAX6_6	AACGGGCAGACCGGAAGCTG	84	77	90	45	6	23	5	19
EGR1	EGR1_3	AACGGGTCAGAGATCTGCAG	136	136	64	61	16	33	18	20
ZNF721	ZNF721_3	AACGTGGCAAAGACTTTGGA	246	153	140	52	9	33	32	38
ZNF99	ZNF99_7	AACGTGGCAAAGCCTTTAAA	33	9	4	11	1	1	2	3
TRPS1	TRPS1_3	AACGTTGCAAGTGAAGGCGA	111	76	31	45	6	27	36	30
ZNF521	ZNF521_1	AACTAGAGGACAGAAACCCA	26	23	32	7	2	5	14	4
ZNF233	ZNF233_4	AACTCAACTCACCTGAAACT	188	106	108	82	23	39	47	87
ZBTB3	ZBTB3_2	AACTCCATAGTACCCCACGA	149	60	44	51	7	15	6	16
HOXA5	HOXA5_1	AACTCCCTAAGCAACTCCAG	201	52	55	39	15	30	20	42
DMRT3	DMRT3_7	AACTCGGCAGCAGGGCGCGG	72	89	39	31	4	19	4	20
TAL2	TAL2_1	AACTCTGCTTGAGAACTACC	55	52	98	88	3	16	29	8
SMAD4	SMAD4_1	AACTCTGTACAAAGACCGCG	23	45	31	17	4	9	15	4
ELF2	ELF2_7	AACTGAAGAGTCTGAACCCA	148	37	29	60	13	13	20	28
NR2C2	NR2C2_3	AACTGACAGCCCCATAGTGA	64	29	58	38	4	9	11	8
HOXC6	HOXC6_5	AACTGCAGACAAAACACCTT	176	101	57	63	17	49	21	33
RBAK	RBAK_3	AACTTACAGGGATGTGATGT	26	14	0	13	14	32	9	4
CDX4	CDX4_7	AACTTGGGCCCTGTGGGCGG	266	163	63	121	28	58	63	93
MYNN	MYNN_3	AACTTGTTCTACTACAGGTG	71	20	6	22	6	10	3	1
THAP2	THAP2_7	AAGAAAAGAATGGGTTCGCC	156	64	25	23	16	31	14	20
ZNF714	ZNF714_2	AAGAAAAGGCTCCGCAAATG	191	97	88	88	13	36	17	31
KIN	KIN_2	AAGAAAATCCGACTTCCCCA	8	17	26	34	5	13	6	9
HIC1	HIC1_1	AAGAAACGCCTCAAGCGCCA	89	56	10	52	9	36	13	27
EN2	EN2_4	AAGAAAGGCGGCGACCCCGG	225	118	44	76	26	35	31	51
PRR12	PRR12_4	AAGAAAGGGCCAGAGCGGGG	95	75	129	37	12	15	8	11
ZNF430	ZNF430_3	AAGAACAGGCTGTAAAAGTG	44	11	20	23	8	3	4	20
TIGD5	TIGD5_5	AAGAACCAGCCCCGCAGCAG	181	156	112	120	12	48	51	73
SP140	SP140_4	AAGAACCTGAAAATGGGCTC	66	49	69	42	3	15	13	24
AHCTF1	AHCTF1_3	AAGAACCTGAGAATGATCCT	46	7	4	23	2	2	5	0
CARF	CARF_1	AAGAACTTGGTAGATGCTGG	114	66	10	52	3	8	13	7
AKAP8L	AKAP8L_5	AAGAAGAAGAGAAAGCAGGG	10	7	9	5	0	0	0	2
ZNF280C	ZNF280C_5	AAGAAGAAGAGCTAGAGCCA	108	56	38	54	15	22	17	25
CXXC5	CXXC5_6	AAGAAGAAGCGGAAACGCTG	108	83	45	26	7	39	28	19
BARHL2	BARHL2_7	AAGAAGACGTGGAAGTCCTG	65	55	7	46	8	15	8	8
EEA1	EEA1_3	AAGAAGAGCAACAACTTCAG	106	76	37	34	5	33	18	12
ZNF280D	ZNF280D_4	AAGAAGAGGAGCTGGAACCA	97	51	54	49	6	13	7	19
YY1	YY1_5	AAGAAGAGTTACCTCAGCGG	185	68	118	29	3	10	1	8
HOXA4	HOXA4_6	AAGAAGATCCATGTCAGCGC	153	33	17	16	11	10	5	6
GLYR1	GLYR1_2	AAGAAGCATTTCTTTCCGCG	430	166	94	86	28	41	51	76
ZBTB7B	ZBTB7B_2	AAGAAGCTTTTCACTGAGGG	57	43	62	34	6	10	1	11
THAP7	THAP7_5	AAGAAGGACAACCCGAGGCG	123	95	35	47	15	38	6	28
GTF2IRD1	GTF2IRD1_7	AAGAAGGTGCAGCGGGGCGA	46	43	72	23	7	20	11	15
SOX3	SOX3_6	AAGAAGGTGCGCCAGCGTGG	189	80	50	78	25	36	24	29
PKNOX2	PKNOX2_1	AAGAAGTCCAAGAACAAACG	68	83	103	41	10	40	35	65
HIVEP1	HIVEP1_7	AAGAAGTCTCATCAAGGGCG	45	45	12	26	5	8	8	11
TWIST1	TWIST1_7	AAGAAGTCTGCGGGCTGTGG	232	86	98	105	8	23	29	39
MBD3	MBD3_2	AAGAAGTGCCCAGAAGGTCG	113	46	34	28	4	9	14	24
ZNF541	ZNF541_2	AAGAAGTTTAGAACCACAGG	267	52	49	76	13	21	37	43
ZNF66	ZNF66_1	AAGAATAGAGGACCGACTGA	71	66	28	60	6	22	12	40
SP1	SP1_3	AAGAATCGCACAGTCTCTGG	34	32	32	13	1	3	1	6
ZNF280D	ZNF280D_3	AAGAATGGTGCACTCAGTCG	91	64	52	26	8	32	17	38
POU2F2	POU2F2_3	AAGAATGTCTAAGCCCCTGG	50	24	45	16	3	7	7	7
ZNF17	ZNF17_4	AAGAATTCCCCACTCCTCCT	131	67	119	85	5	7	11	20
REL	REL_6	AAGAATTGTGGAAGTGTCAG	102	37	17	20	1	9	13	16
HBP1	HBP1_7	AAGACAAAGATGCACGACGC	43	70	46	31	4	36	17	31
ZNF221	ZNF221_4	AAGACAACAAGCCAAAGAGA	111	37	48	21	2	2	12	33
ZNF224	ZNF224_4	AAGACAGCAATCCAAAGGGA	130	27	58	24	2	11	6	8
ZNF727	ZNF727_7	AAGACAGTAGCCAAACACCC	53	7	9	27	3	13	0	3
ZNF564	ZNF564_2	AAGACCAGAGCATTGAAGAT	23	15	0	23	7	6	0	0
ZNF627	ZNF627_1	AAGACCCATTCAAAATTCCC	55	67	120	37	16	22	12	19
OTP	OTP_5	AAGACCCGGACAAGCAGCCC	188	33	33	39	9	29	21	39
NME2	NME2_1	AAGACCGACCATTCTTCCCT	111	80	3	40	4	9	12	46
EN2	EN2_2	AAGACGCTCTCGCTGCACGG	229	152	186	102	22	54	29	50
HMBOX1	HMBOX1_4	AAGACGGTCCAAAGTTTCCA	119	64	61	53	19	30	21	33
GATA2	GATA2_1	AAGACGTCCACCTCGTCTGG	17	63	34	30	2	17	11	19
FOXK2	FOXK2_5	AAGACTGGCTGACTGGACAG	89	25	26	25	2	19	22	30
ZNF561	ZNF561_5	AAGACTTGTGGATGTAGTGA	80	81	15	39	7	28	17	19
FOS	FOS_6	AAGAGAAAAGGAGAATCCGA	106	17	4	7	8	3	6	2
NFX1	NFX1_1	AAGAGAAATGCACTGTACGG	125	90	119	112	14	21	15	31
ZNF195	ZNF195_2	AAGAGACAGGAGGCAGCAGA	156	51	62	18	5	12	21	29
GMEB1	GMEB1_1	AAGAGAGCTATTCGTCTGGG	136	119	50	57	12	18	14	15
ZNF860	ZNF860_7	AAGAGATATCCACAGAATGC	74	61	28	41	2	25	5	9
ZNF578	ZNF578_4	AAGAGATGACCTGTGACTGA	35	30	18	18	2	6	12	12
ZSCAN25	ZSCAN25_4	AAGAGCACTGGAGGCCAAGG	48	54	65	24	7	10	7	11
ZFP82	ZFP82_2	AAGAGCCTTGGAAAGTTGTG	92	91	99	72	10	32	38	37
ZNF43	ZNF43_2	AAGAGCCTTGGGAGCCTATG	76	23	29	12	3	3	3	23
LHX4	LHX4_5	AAGAGCGTCAAGAGGAGCCG	26	17	38	21	3	14	8	20
ZNF614	ZNF614_2	AAGAGCGTGCAGCAATGCAA	231	138	35	134	33	55	58	49
RORA	RORA_4	AAGAGCTCCAGCAGATAACG	45	44	60	57	3	14	13	17
RFX5	RFX5_1	AAGAGGACGAACATGCACCT	115	71	48	85	8	17	11	16
FOXR2	FOXR2_7	AAGAGGAGACCCAGTCCTGA	126	54	17	44	7	18	10	26
NR0B1	NR0B1_7	AAGAGGCGCTACCAGGCGGG	202	106	82	67	20	63	19	39
TCF12	TCF12_7	AAGAGGCTCTTACCAGGGAG	33	56	64	23	0	19	12	24
ZNF24	ZNF24_2	AAGAGGGATCAAGTATCCCC	121	129	94	63	24	57	23	35
EBF1	EBF1_3	AAGAGGGCGTACCTTCCGAG	65	0	5	0	0	0	0	0
POU2F1	POU2F1_5	AAGAGGGGAGGACAAAGGAG	0	0	0	0	0	0	0	0
MBD1	MBD1_3	AAGAGGGTGAGATCACACGC	141	170	99	100	31	66	35	71
ZNF497	ZNF497_4	AAGAGGGTGGACCCTGCAGG	0	5	0	5	2	5	0	3
NFKB2	NFKB2_2	AAGAGGTGCAGCGGAAGCGG	38	62	108	45	14	41	12	13
ZNF208	ZNF208_7	AAGAGTCGAGACCTTACTAA	105	25	19	27	5	10	20	23
ZNF318	ZNF318_4	AAGAGTCGTCGGCCCCGCGG	125	78	18	55	9	42	18	16
ZNF280C	ZNF280C_1	AAGAGTGAGCCACACAGTCC	22	48	29	56	5	22	18	15
ZNF430	ZNF430_5	AAGAGTTGAAGACTGGCTAA	42	59	64	22	5	19	17	48
ZNF679	ZNF679_4	AAGAGTTGAGGAGAAGGCAA	99	73	84	53	11	23	22	27
MYSM1	MYSM1_3	AAGATAAAGGGACAAAGGCA	55	78	66	84	24	33	47	56
XPA	XPA_4	AAGATAATTGACACAGGAGG	73	89	39	65	10	18	20	39
ZNF155	ZNF155_2	AAGATACTTGCCACTTCCTA	31	16	13	36	7	12	8	6
THAP6	THAP6_6	AAGATAGAAGGTATGACTCC	31	20	12	8	6	21	3	7
ZNF136	ZNF136_2	AAGATCACTACAAACACCGA	61	78	42	38	2	13	23	30
ZNF442	ZNF442_2	AAGATCAGCACAGAAATCCC	111	172	88	130	15	61	28	49
LMX1A	LMX1A_1	AAGATCAGCAGAACACCCAG	107	46	33	44	6	13	24	34
ARID3B	ARID3B_3	AAGATCAGGATCAACGGCAG	52	55	60	31	6	18	10	22
KMT2A	KMT2A_1	AAGATCAGTAGCGGTCCCGG	92	53	26	31	5	22	16	27
ZNF141	ZNF141_3	AAGATCGTAGCCAGACCCCC	213	91	65	109	19	58	13	38
ZBTB14	ZBTB14_3	AAGATGAACAGACACCAGGC	75	57	33	32	19	44	19	20
ZNF14	ZNF14_2	AAGATGACCACAGAAACCAG	40	36	4	25	3	7	10	22
ZNF367	ZNF367_4	AAGATGACGGGCGGCGGCGG	88	54	16	76	12	10	13	14
ZNF878	ZNF878_1	AAGATGAGCACCAAAATCCT	141	139	85	129	21	37	39	72
ZNF80	ZNF80_1	AAGATGAGCCCTAAACGCGA	45	18	6	18	2	6	4	13
ZNF703	ZNF703_2	AAGATGCTGAGCGCTCACAC	80	53	67	63	8	5	21	57
PLAGL1	PLAGL1_1	AAGATGCTTCTACACCCGGA	166	66	44	35	12	34	13	11
CREB3L1	CREB3L1_4	AAGATGGAGGACACCACCCA	189	106	81	75	14	52	15	46
PURB	PURB_2	AAGATGGCGGACGGCGACAG	119	88	74	66	13	58	19	57
ARID5A	ARID5A_4	AAGATGGCTAAGGAGAACAG	22	12	7	7	1	9	6	5
BARX2	BARX2_2	AAGATGGTGCGACTCCGGCG	70	60	27	23	18	42	19	10
ZNF883	ZNF883_2	AAGATGTGCACTCCGATTGA	174	135	97	82	7	36	17	19
REPIN1	REPIN1_7	AAGATTCACAAGCGATCCGA	74	67	26	45	18	26	14	21
DUXA	DUXA_2	AAGATTCCTGAGGGACTGCA	156	51	92	29	6	16	22	46
ZNF439	ZNF439_6	AAGATTTGGGGCAGATCTGA	57	47	32	53	10	7	14	15
ZNF320	ZNF320_4	AAGCAACGAGCAACTCTTGC	1	23	15	28	2	6	8	6
ZFP1	ZFP1_6	AAGCAAGAGAAAACCCACAG	12	15	32	5	3	5	7	7
ZNF677	ZNF677_2	AAGCAAGGGATTATCACCAA	25	49	21	21	10	12	7	12
GZF1	GZF1_6	AAGCACAGCAAGCACCGCCA	102	85	69	77	14	29	31	65
SP6	SP6_3	AAGCACATGAAAACCCACGA	10	16	13	10	7	8	5	0
GRHL1	GRHL1_2	AAGCACTTTATCCACAGCGG	63	28	51	18	2	10	14	23
GABPA	GABPA_4	AAGCAGAGTGCACAGAAGAA	77	66	53	19	10	17	11	14
TERF2	TERF2_5	AAGCAGATTGGTCTTGGAGG	76	20	35	34	3	8	13	18
ZBTB25	ZBTB25_5	AAGCAGCAAGCACTGCTCTG	66	63	50	24	7	12	3	5
FOXF1	FOXF1_2	AAGCAGCAGCCACCGCACGG	92	65	14	43	14	34	19	22
ZSCAN31	ZSCAN31_6	AAGCAGCAGGCACATTCCAC	200	97	107	35	14	24	13	3
TCF7L2	TCF7L2_7	AAGCAGCCGGGAGAGACCAA	54	53	28	11	3	5	17	13
HMGA1	HMGA1_5	AAGCAGCCTCCGGTGAGTCC	118	39	43	40	16	12	12	10
GCM1	GCM1_1	AAGCAGGTCTCCACTACTGT	73	18	44	29	1	5	17	26
ZNF569	ZNF569_7	AAGCAGTGAGCACTGAGAGA	240	94	70	110	22	47	19	30
ZBTB33	ZBTB33_1	AAGCATCTCAGGTACAGCGC	133	52	68	50	8	29	35	29
ZNF266	ZNF266_6	AAGCATGCACGAACTCACAG	172	74	77	70	11	30	37	36
ZNF569	ZNF569_5	AAGCATGGAAAACTGAGAGA	37	26	0	16	7	13	6	10
ZNF878	ZNF878_6	AAGCATGTAAGGACTCACGC	66	18	38	14	3	7	7	20
ZNF35	ZNF35_5	AAGCCATGGCCCTAGCCCCA	11	34	0	35	3	11	4	4
ZNF410	ZNF410_7	AAGCCCCTGTCCCAATGGGA	367	230	160	125	16	57	25	75
ATOH8	ATOH8_7	AAGCCCTGCAGCAGACCCGG	233	202	136	154	14	39	20	37
JDP2	JDP2_6	AAGCCCTGGCAGGGAGCCTG	0	27	11	13	1	2	10	6
NME2	NME2_3	AAGCCGGACGGCGTGCAGCG	128	96	59	75	17	31	25	36
SP1	SP1_1	AAGCCGGTCGGAGGACCCGG	55	23	72	17	3	4	4	4
ZNF28	ZNF28_6	AAGCCTACGATGGCGTGCAA	182	55	33	35	14	27	15	28
ZNF28	ZNF28_4	AAGCCTATGATGGTATACGA	47	17	72	17	6	23	13	26
ZNF879	ZNF879_1	AAGCCTTCACTTCAATATCG	92	104	60	95	8	20	31	56
POU2AF1	POU2AF1_6	AAGCGAGGCCACGCCAGCAG	133	94	118	72	6	21	21	30
ZNF468	ZNF468_7	AAGCGATGATGTCTGACCGA	169	196	128	72	15	64	41	94
SEBOX	SEBOX_4	AAGCGGACCACCTTCAGCAA	54	73	24	23	22	32	7	21
ARX	ARX_7	AAGCGGAGTCGAGCGCCGGG	173	188	169	198	41	66	62	124
ZNF444	ZNF444_5	AAGCGGCGGAAGCGGTGCCA	79	107	65	52	13	35	8	18
ZNF493	ZNF493_5	AAGCGGTCCTCACACCTCGC	50	99	37	75	12	60	18	32
NFE2L3	NFE2L3_7	AAGCGGTGGTGGTCGGCCGG	264	183	166	135	29	86	42	70
TFAP4	TFAP4_7	AAGCTCAGGTACCTGCACGA	47	26	27	5	1	0	0	0
PURB	PURB_1	AAGCTCATAGACGACTACGG	112	46	49	22	2	14	9	14
IKZF2	IKZF2_3	AAGCTCCACACTGGTTACAG	41	42	47	15	7	11	10	15
MGA	MGA_7	AAGCTGATGGAAACAAGCAT	116	74	54	49	13	13	27	36
ZNF780B	ZNF780B_1	AAGCTGATTGAGGAGACTAA	197	134	69	55	24	44	15	30
SPDEF	SPDEF_1	AAGCTGCTCAACATCACCGC	138	93	41	32	15	26	26	54
AEBP2	AEBP2_4	AAGCTGGAATGAACAAAAGG	115	41	35	38	4	0	11	0
ZNF780A	ZNF780A_7	AAGCTGGTTGAGAAGACTAA	100	59	64	100	7	18	21	19
ZNF704	ZNF704_3	AAGCTGTCAGCCGAGAGCGG	94	13	40	22	4	14	15	17
MAFB	MAFB_2	AAGCTGTCGAAGCTTTGCAG	83	50	34	57	18	20	14	14
ZNF780B	ZNF780B_7	AAGCTGTGTCAGAAGACCAA	126	80	96	62	7	15	18	26
ZNF680	ZNF680_5	AAGGAAAAGAGCCCTGGAAT	165	59	68	79	6	16	12	18
SP140L	SP140L_2	AAGGAAAGTGACCAAGCATG	105	28	7	41	13	22	29	34
ZKSCAN5	ZKSCAN5_4	AAGGAACTTGGAGAACAGGA	8	7	12	4	0	0	5	5
MBD6	MBD6_4	AAGGAAGCCACCAAAAGCGA	22	37	27	25	1	21	5	6
FAM200B	FAM200B_7	AAGGAAGCTCATTGAATAGC	65	43	13	55	9	26	5	21
ISX	ISX_2	AAGGAAGGAAGAGCAAGCGG	84	63	54	18	4	4	11	4
ZNF682	ZNF682_5	AAGGAAGGATGGGGAAAATG	17	16	6	27	1	3	8	23
ZNF440	ZNF440_7	AAGGAATGTGGGAAACCCTT	6	19	25	23	4	13	7	7
ZFPM1	ZFPM1_2	AAGGACAGGAACCAGAACCC	37	6	0	8	0	5	1	2
DMTF1	DMTF1_5	AAGGACATAAATGGAAGCAG	94	50	19	28	9	30	0	4
ZNF90	ZNF90_4	AAGGACTAAGGAGCGCCTGA	204	118	92	86	17	25	31	63
ALX1	ALX1_6	AAGGACTGACAGCTACCCAC	112	126	88	81	26	37	41	57
ZSCAN29	ZSCAN29_6	AAGGAGAAAGAACTTCCAAG	11	9	19	18	1	4	16	14
ZFP37	ZFP37_5	AAGGAGAAGCACCATGGTTG	48	63	21	16	13	16	16	13
HOXC9	HOXC9_4	AAGGAGACGGCGCCGGACAG	185	64	69	65	16	24	11	8
ZNF418	ZNF418_3	AAGGAGACTCCACTCCTCCT	31	24	11	16	3	14	0	5
NFATC1	NFATC1_2	AAGGAGAGACGGACATCGGG	24	15	32	9	2	3	0	12
HEY1	HEY1_6	AAGGAGAGTGCGGACGAGAA	24	67	48	37	13	19	7	16
CREBZF	CREBZF_3	AAGGAGAGTTGGAAGCCGGG	44	42	18	25	5	16	14	11
ZNF383	ZNF383_5	AAGGAGATCACTTGAGGCTT	71	45	38	54	5	10	12	46
ZIM2	ZIM2_5	AAGGAGATGTACCAACCAGA	214	227	136	104	25	69	38	66
PRDM15	PRDM15_1	AAGGAGCAGGACACACCCCG	92	24	23	43	13	10	7	10
IRF8	IRF8_4	AAGGAGCCCTTCCCCGCCGG	72	66	67	25	14	25	6	3
HEYL	HEYL_4	AAGGAGCCGAGCGGCTCCGA	65	62	41	73	19	25	29	25
TBX2	TBX2_3	AAGGAGCCGGCCGAGAGCGG	124	57	48	34	8	21	4	8
ZNF480	ZNF480_7	AAGGAGCGCAATCCTATAGA	6	27	12	3	3	7	3	0
ZNF235	ZNF235_2	AAGGAGCTTCAAACCCAAAG	158	88	94	70	13	35	19	35
ZNF541	ZNF541_6	AAGGAGGAAGGGCCACCTCG	213	136	135	108	14	27	10	26
CIC	CIC_3	AAGGAGGAGCAAGAGGGCGG	10	15	12	8	1	5	1	0
ZNF687	ZNF687_2	AAGGAGGTCATCAAAATCAG	81	74	36	47	9	29	6	17
GRHL1	GRHL1_4	AAGGAGGTGAGCAGCAGTGA	116	73	72	50	4	17	23	19
KMT2B	KMT2B_4	AAGGAGTAGGGGCCTCCGGG	38	10	19	16	0	0	5	3
SETDB2	SETDB2_3	AAGGAGTCTACGAAACGTGG	157	68	117	72	7	34	19	34
ZNF660	ZNF660_1	AAGGAGTGTGGGAAAACATG	59	44	19	39	7	8	11	6
AHCTF1	AHCTF1_7	AAGGATAACATCGTTACCAC	103	92	85	51	17	20	22	52
ZC3H8	ZC3H8_1	AAGGATCAAATGCTTTGCTG	69	82	47	38	1	9	11	3
ZNF676	ZNF676_3	AAGGATCGAGGACCAGCTGA	153	74	21	62	10	29	8	10
GATAD2A	GATAD2A_5	AAGGATGATCAAGCAGCTGA	158	57	50	43	6	25	28	23
ZNF136	ZNF136_6	AAGGATGGTAGTCAGCGTGG	88	29	23	22	2	7	19	37
CDX1	CDX1_3	AAGGATTCGCCCGTGTACCC	30	45	21	38	2	15	8	18
ZNF440	ZNF440_6	AAGGATTGACACAGCTCTGA	145	98	95	83	12	18	24	48
ZNF729	ZNF729_6	AAGGATTGAGGACTGACTAA	113	66	23	28	8	13	9	6
ZMAT4	ZMAT4_2	AAGGCAAAATCCACGCCAAG	186	100	112	115	23	50	30	65
ZNF570	ZNF570_2	AAGGCAACCAGGTAATCAGA	39	25	27	11	2	11	1	1
STAT4	STAT4_1	AAGGCAATTGGAGAAACTAG	90	31	23	25	3	12	15	8
ZNF124	ZNF124_1	AAGGCAATTGGAGTAACGGA	70	32	19	63	8	22	11	19
ZSCAN16	ZSCAN16_1	AAGGCAGAGGACCATTACTG	22	43	24	30	7	6	13	11
GLI3	GLI3_4	AAGGCAGGGAAAAGATGAGG	44	29	37	34	0	2	3	9
FOXF1	FOXF1_7	AAGGCAGGTGGGGCACCGAG	77	49	60	23	10	25	5	14
ZNF501	ZNF501_4	AAGGCATATGCTCTGACTGA	95	114	108	51	19	16	23	30
ASCL3	ASCL3_3	AAGGCATCGGGAAAGAGAAG	17	21	22	16	5	15	7	6
FOXF1	FOXF1_1	AAGGCCAAGAAGACCAACGC	62	69	25	47	11	43	10	13
ZNF490	ZNF490_4	AAGGCCGCACAGGAACAGGA	212	67	74	76	7	16	20	30
MBD2	MBD2_7	AAGGCCGCTGCCGCCACTCG	274	121	104	97	29	74	68	65
RARB	RARB_1	AAGGCCGTCTGAGAAAGTCA	100	58	44	38	10	26	10	19
ZNF121	ZNF121_7	AAGGCCTGAGCGCCCAGCGA	14	47	55	25	5	26	9	13
ZNF559	ZNF559_5	AAGGCCTGATGAGATACTGA	84	54	64	31	13	16	15	9
ZEB2	ZEB2_7	AAGGCGAGACAGCTCCTCAG	39	5	44	26	0	5	0	5
HOXD10	HOXD10_6	AAGGCGGCCTTCCCGAAGAG	103	34	39	18	5	6	4	3
GBX2	GBX2_2	AAGGCGGTGCTACTCCCCAG	169	90	67	79	13	45	29	51
CRX	CRX_5	AAGGCGTTGACAGAATAGTG	118	37	37	21	9	15	27	43
E2F8	E2F8_2	AAGGCTCTCAGGGAGAGCCG	57	32	5	19	3	15	1	1
DMRTB1	DMRTB1_1	AAGGCTGGGCATCGCCACGG	119	53	41	45	3	39	6	14
ZNF142	ZNF142_7	AAGGCTGTGGATAAAGGCCA	95	29	16	26	5	11	3	11
ZNF283	ZNF283_7	AAGGCTTGAACCCCAACTAA	120	118	60	89	24	37	28	41
ZNF677	ZNF677_7	AAGGCTTGAACGTTCAGCAA	89	42	41	50	7	16	15	24
ZNF728	ZNF728_7	AAGGCTTGAGGACCGGGTGA	275	191	144	141	28	68	41	63
ZNF140	ZNF140_2	AAGGGAAAGAACCCTGGCTG	108	87	83	56	14	12	5	18
ZNF440	ZNF440_1	AAGGGAACTGGAATGAGGGA	34	72	12	42	3	9	16	19
ZNF124	ZNF124_5	AAGGGAACTGGCGTATCTGA	118	88	87	47	7	25	17	20
ZNF891	ZNF891_4	AAGGGAAGAGGAAACACTGA	135	80	21	37	8	30	3	8
ZNF501	ZNF501_6	AAGGGAAGAGTTCTGAGTGA	33	26	71	65	6	6	13	27
ZNF669	ZNF669_5	AAGGGAAGTGGAACAGCTGA	31	52	26	21	9	16	7	12
ZNF454	ZNF454_3	AAGGGAAGTGTGGATGCCAG	99	90	2	33	8	26	16	18
AC008770.3/ZNF700	AC008770.3/ZNF700_5	AAGGGAATTGCAACATCTGA	385	188	119	119	30	83	40	57
RORB	RORB_6	AAGGGACAGCCTGTATGCTG	251	135	69	56	27	52	41	66
ZNF816	ZNF816_5	AAGGGATGACATCTGAGTGA	264	168	179	198	54	74	103	103
ZNF611	ZNF611_5	AAGGGATGACCTGCGACTGA	125	80	88	124	14	51	8	21
ZNF808	ZNF808_7	AAGGGATGACCTGTTACTGA	124	101	48	58	7	21	21	23
ZNF761	ZNF761_6	AAGGGATGACGTCCGACTGA	148	81	38	38	11	31	24	23
ZNF813	ZNF813_6	AAGGGATGACGTCTGACTAA	331	218	96	155	44	95	54	88
ZNF791	ZNF791_7	AAGGGATGAGAGACGCATGA	59	34	67	37	3	13	5	26
ZNF600	ZNF600_1	AAGGGATGATACCTGACTGA	120	69	46	44	19	39	5	23
ZNF569	ZNF569_6	AAGGGATGCAATTCGAGGGA	145	49	18	23	7	21	6	12
ZNF808	ZNF808_5	AAGGGATGCCCGGTGACGGA	98	33	80	27	4	11	12	28
ZNF354A	ZNF354A_1	AAGGGATGTACTGAGAGTAA	208	153	150	96	27	51	63	62
FOXA2	FOXA2_2	AAGGGCACGAGCCGTCCGAC	111	57	46	20	6	15	10	7
FOXA1	FOXA1_5	AAGGGCATGAAACCAGCGAC	161	89	40	57	25	58	19	42
ZNF845	ZNF845_6	AAGGGCTGAATTTCGACCGA	42	40	34	23	5	22	34	37
MEF2A	MEF2A_7	AAGGGCTGACAGGTCAGCGC	94	73	103	39	17	13	37	34
ZNF90	ZNF90_7	AAGGGCTGAGGAGTACTTGA	53	37	70	43	8	12	18	26
ZFP37	ZFP37_1	AAGGGGAAAAGACCCAGTCA	41	40	43	36	11	22	6	13
ZBTB45	ZBTB45_5	AAGGGGAAGAGTGCAACGGG	49	13	14	18	1	2	0	0
CIC	CIC_6	AAGGGGACTAAGGAGTGCCA	33	36	20	11	3	9	6	5
CREB3L1	CREB3L1_5	AAGGGGCTGAGGCCCAGCAG	32	10	15	3	2	8	6	2
TCF7L2	TCF7L2_5	AAGGGGTAGCCGGGATACGG	93	72	38	41	14	37	22	35
ZIC5	ZIC5_3	AAGGGGTGGGAGGAAGAGGA	0	1	0	5	0	0	0	3
SETDB2	SETDB2_5	AAGGGGTTTTATAACTCACG	47	47	0	54	6	12	32	31
ZNF124	ZNF124_7	AAGGGTACTAGCACGACTAA	91	46	42	34	2	10	21	9
ZNF20	ZNF20_1	AAGGGTAGTGGAACGAGTAA	76	23	23	17	14	28	11	22
ZNF486	ZNF486_7	AAGGGTATAGGGGTACATAA	60	38	29	33	12	20	19	11
ANHX	ANHX_3	AAGGGTCACCAGCTCCGCCG	114	190	571	68	13	45	39	46
ZNF285	ZNF285_5	AAGGGTGACATTCAAGGATG	86	27	55	6	9	17	3	8
THAP11	THAP11_5	AAGGGTGAGAAGCACGGCCG	59	37	15	3	3	25	6	12
ZNF100	ZNF100_5	AAGGGTTGAGAACCAGTTGA	218	162	85	139	20	47	48	63
ZNF260	ZNF260_4	AAGGGTTGAGAACTGAGAAA	95	29	17	15	5	9	9	14
ZNF728	ZNF728_2	AAGGGTTGAGAAGTTACCAA	185	61	65	47	9	31	35	39
ZNF208	ZNF208_1	AAGGGTTGAGACCTTACTGA	71	25	25	15	5	13	6	5
ZNF91	ZNF91_7	AAGGGTTGAGGACCAATGAA	105	42	67	20	2	5	10	16
ZNF93	ZNF93_5	AAGGGTTGAGGATGCAACAA	224	151	116	130	20	46	41	51
PLAG1	PLAG1_2	AAGGTAAGGACATCACCGGA	163	106	109	57	18	49	11	26
ZNF765	ZNF765_2	AAGGTACGACTTCTGACTAA	129	50	57	49	17	19	17	38
ZNF573	ZNF573_6	AAGGTAGCCATACAAGCTAA	54	36	49	29	4	20	5	16
ZNF570	ZNF570_7	AAGGTAGGCAAACTGGCTGA	124	29	20	36	9	20	13	28
ZNF737	ZNF737_6	AAGGTATGAAAACCGGCTAA	106	113	17	60	10	26	18	31
ZNF600	ZNF600_5	AAGGTATGACCTCAGACGGA	130	71	66	63	6	12	22	37
ZNF611	ZNF611_3	AAGGTATGACCTGTGACTGA	147	87	59	68	15	42	35	51
ZNF845	ZNF845_7	AAGGTATGACGTTTGACTGA	58	33	26	43	5	10	19	13
DMRT1	DMRT1_6	AAGGTCCGGGGAGGCCCCGA	134	64	46	39	13	15	11	9
E2F1	E2F1_2	AAGGTCCTGACACGTCACGT	113	26	6	31	3	10	11	12
ZNF705E	ZNF705E_7	AAGGTCGGAAGACAGACTGA	47	56	43	25	7	12	7	13
ZNF705B	ZNF705B_5	AAGGTCGGAGGACAGACTGA	81	33	33	34	3	7	8	5
ZNF404	ZNF404_7	AAGGTCTCCAACACGACTGA	70	62	91	51	7	12	13	19
ZNF626	ZNF626_5	AAGGTCTGAAGACCGCTTGA	196	83	71	83	13	29	11	35
ZNF727	ZNF727_5	AAGGTCTGAGAACCACCTAA	146	55	18	43	5	20	7	5
ZFP14	ZFP14_2	AAGGTCTGGACCACATACGA	104	84	37	43	13	18	13	10
ZNF253	ZNF253_6	AAGGTCTGTGGATCGGTTGA	132	53	32	34	11	15	22	33
ZNF124	ZNF124_4	AAGGTGACTGGAACGACTGA	75	15	7	29	12	14	11	8
ZNF669	ZNF669_7	AAGGTGACTGGAACGAGTGT	59	51	32	32	12	23	11	18
ZNF750	ZNF750_4	AAGGTGAGCCGGCTTTCCAG	123	52	71	69	13	27	26	31
TBX15	TBX15_6	AAGGTGAGTGTGCGCACAGG	60	47	8	42	10	35	36	37
ZNF33A	ZNF33A_2	AAGGTGCGAAGTCACACGGA	191	129	35	83	24	56	45	61
TIGD6	TIGD6_7	AAGGTGCGGGAGGCATCCGT	68	24	23	16	3	5	5	5
AC008770.3/ZNF700	AC008770.3/ZNF700_4	AAGGTGCTTCACATATCTGA	528	240	263	221	32	81	127	120
FOXR2	FOXR2_5	AAGGTGGCTACAATTGAGAG	30	29	1	30	6	9	2	4
ZNF607	ZNF607_1	AAGGTGGGAAAACTGACGAA	76	25	18	51	3	10	8	15
ZNF329	ZNF329_4	AAGGTGGGAGATGTCAGTGA	152	42	38	19	12	10	13	9
ZNF492	ZNF492_1	AAGGTGGGATAACTGGCTAA	42	41	52	23	14	24	17	26
ZNF781	ZNF781_1	AAGGTGGGCACGCTTTCTAA	192	124	52	72	25	34	26	37
ZNF558	ZNF558_3	AAGGTGGTGACAGAGGAAAG	0	7	0	0	0	3	0	0
LIN28B	LIN28B_3	AAGGTGGTGGAGAAGAGCCC	0	3	0	0	0	0	0	0
SALL1	SALL1_5	AAGGTGGTGGCACTGCCCGC	113	93	55	60	13	23	8	19
ZSCAN20	ZSCAN20_3	AAGGTGTCAGGTGTTCACTG	113	26	20	16	6	2	3	9
ZFHX2	ZFHX2_5	AAGGTGTCCGAAGGCAGGGA	43	19	30	12	1	17	2	2
ZNF708	ZNF708_5	AAGGTGTGAAGATAGGGTAA	75	52	50	18	2	4	4	19
ZNF730	ZNF730_4	AAGGTGTGAGAACCGCCTAA	176	74	63	89	25	37	23	49
ZNF626	ZNF626_6	AAGGTGTGAGGACCGCTTGA	128	25	74	28	7	16	6	15
ZNF90	ZNF90_6	AAGGTGTGAGGACCTGTTGA	52	23	32	10	6	14	11	17
ZNF737	ZNF737_7	AAGGTGTGAGGACGAGTTGA	72	46	0	35	12	17	9	4
ZNF681	ZNF681_2	AAGGTGTGAGGACTGCCTAA	110	72	55	39	6	13	30	35
ZNF486	ZNF486_5	AAGGTGTGAGGAGCGGGTGA	16	7	5	5	1	3	10	0
ZNF253	ZNF253_7	AAGGTGTGAGGATAGGTGAA	136	93	89	49	11	9	14	22
ZNF844	ZNF844_5	AAGGTGTGAGGCAGATGTGA	57	9	42	5	4	10	0	2
ZNF502	ZNF502_5	AAGGTGTGCATACTTGCGGA	131	59	41	74	10	21	17	26
ZNF454	ZNF454_2	AAGGTGTGCCCTGCACACAA	42	64	6	38	11	13	20	22
ZNF883	ZNF883_5	AAGGTGTGTACTTCGACTGA	124	57	63	24	11	35	18	11
GATAD2B	GATAD2B_7	AAGGTTCATATAGATGGCAG	173	81	45	102	13	26	40	38
ZNF440	ZNF440_2	AAGGTTCTGGGCAGATCCGA	159	180	85	59	17	29	28	44
NFX1	NFX1_3	AAGGTTGATTCTGAAGGCCA	272	102	182	81	16	23	41	49
HSF2	HSF2_7	AAGGTTTAAAGCCAAGGGAG	152	34	54	42	4	18	36	29
ZNF44	ZNF44_6	AAGGTTTCCAGGAGAACTGA	34	28	4	27	0	2	6	4
ZNF844	ZNF844_6	AAGGTTTCTGACAGATCCAA	80	36	38	43	6	6	27	29
ZNF573	ZNF573_7	AAGGTTTGAAGCACGACTGA	173	180	103	79	23	77	24	52
AC008770.3/ZNF700	AC008770.3/ZNF700_6	AAGGTTTGAGGCACAACTGA	364	155	110	106	26	94	52	94
ZNF728	ZNF728_5	AAGGTTTGCAACCTTACTGA	62	55	73	43	7	20	10	21
ZBTB40	ZBTB40_5	AAGGTTTGCACAGCAGGGGA	21	6	11	10	5	6	3	13
ZNF345	ZNF345_1	AAGGTTTGCACCACTACCAA	120	76	122	61	12	37	26	19
ZNF479	ZNF479_6	AAGGTTTGCAGACCAGCTAA	133	101	112	63	10	18	8	20
DR1	DR1_3	AAGGTTTTCCAAACGAGAAC	33	40	7	12	2	9	14	4
VAX1	VAX1_6	AAGTAAATCCAATTCCGCAG	74	47	24	5	2	15	4	3
VEZF1	VEZF1_6	AAGTAGAAACACTGAGACTG	117	48	85	47	8	7	19	25
ZNF404	ZNF404_1	AAGTAGATAGCTGCGAACAA	166	48	5	28	14	16	8	7
ZNF420	ZNF420_2	AAGTAGTAAGCCACGCGCAA	133	73	42	37	4	27	19	39
HLF	HLF_3	AAGTATCTCCGTCATAGGGA	121	40	42	32	7	17	22	20
ZNF800	ZNF800_1	AAGTCAGCCTGCGACTCCTG	109	152	66	68	10	49	21	37
ZNF789	ZNF789_3	AAGTCATTAGGCGTAAGGCA	185	63	71	52	34	35	19	27
PAX6	PAX6_1	AAGTCCCCGGATACCAACCA	495	296	249	237	16	44	24	72
PRDM5	PRDM5_5	AAGTCCTCCCGGGTTCAGGA	180	182	95	136	34	51	21	59
SHOX2	SHOX2_1	AAGTCGGACCAATTTCACCC	119	59	23	48	4	34	12	13
RHOXF2	RHOXF2_4	AAGTCGGCAGGAGCCCAAGG	218	80	30	41	23	28	28	16
ZBTB40	ZBTB40_7	AAGTCGTCTTCACAGCCTGG	68	125	23	62	19	40	20	25
PHF20	PHF20_3	AAGTCTTCCCAAGAACGAGA	44	24	0	25	3	7	11	24
OVOL2	OVOL2_5	AAGTCTTCCTGGTGAAGAGG	17	2	27	3	0	0	0	0
ZNF728	ZNF728_6	AAGTCTTGAGGACCAGATGA	113	29	35	36	10	18	5	2
SP100	SP100_5	AAGTGAAGAAGAAGAGAGGG	19	15	13	15	1	3	1	0
LBX2	LBX2_6	AAGTGAGTCTTGGGGAGTTG	100	50	54	62	6	23	30	36
ZNF669	ZNF669_2	AAGTGATGCAGGAAACCTGC	195	97	75	70	17	32	33	38
ZNF589	ZNF589_7	AAGTGATGCTGGAAAATCTC	85	94	62	55	9	22	20	22
ZNF260	ZNF260_7	AAGTGATGTGATTCGAGAGA	0	15	28	10	4	9	5	7
ZNF146	ZNF146_2	AAGTGATGTTCGCTGAGAGA	40	32	13	23	10	31	5	6
ZFP37	ZFP37_2	AAGTGCGGAAACGACCAAAG	126	23	42	31	6	23	2	6
PGR	PGR_7	AAGTGGTCTAAATCATTGCC	84	93	92	57	13	36	10	32
HIF1A	HIF1A_1	AAGTGTACCCTAACTAGCCG	74	21	0	8	4	13	1	10
ZNF432	ZNF432_4	AAGTGTTCTCCAGAAAGTCC	99	81	52	51	3	17	18	25
LBX1	LBX1_4	AAGTTACTCGCTGTGCGGGG	164	74	54	67	22	57	41	16
NPAS3	NPAS3_3	AAGTTATAGGTGCACAGCGA	85	37	65	38	11	25	13	15
ZNF788	ZNF788_1	AAGTTCTGAGGCGCATCCAA	126	97	55	31	14	39	24	22
ZNF805	ZNF805_5	AAGTTCTTGGATGTTGACTG	162	125	82	40	27	33	39	56
ZNF24	ZNF24_6	AAGTTGGAGGAGGATCCTGA	68	35	70	31	7	15	14	15
ZNF280B	ZNF280B_4	AAGTTGGGAAGCTGGCAGGA	70	56	36	48	1	14	5	5
ZNF518A	ZNF518A_2	AATAACTGTTTCTGTTCAGA	92	49	66	44	4	12	29	34
ZNF573	ZNF573_1	AATACCTGGACCCTAATCAG	41	14	21	27	5	4	2	2
CCDC169-SOHLH2	CCDC169-SOHLH2_7	AATACCTGGGCCATAACGGC	133	100	49	85	34	41	25	53
ZNF383	ZNF383_4	AATACTAGAAGCCATGGCTG	54	45	62	51	8	27	8	13
ZNF12	ZNF12_4	AATAGAGAGAATCCAGGAAG	51	11	18	28	5	16	9	26
NR1H4	NR1H4_7	AATAGGTCAGAATGCCCAGA	50	71	33	38	14	19	18	12
ZNF385D	ZNF385D_1	AATATCAACGACGACAACTG	137	69	93	57	11	32	36	27
ZNF786	ZNF786_6	AATATCCTGGATTGAACACG	89	45	54	45	7	22	22	35
ZNF766	ZNF766_6	AATATCTCCAGTTCTGGCAG	203	89	16	36	11	32	19	29
HHEX	HHEX_3	AATATCTCTCTCCGCCCGAG	112	91	74	57	7	36	6	16
ZKSCAN1	ZKSCAN1_6	AATATCTCTGGGTCTGGAGG	105	74	85	104	1	40	36	53
ZNF529	ZNF529_4	AATATCTGGATTCTGCTCAG	72	80	83	67	16	38	13	35
TGIF2LY	TGIF2LY_1	AATATGGAGGCCGCTGCAGA	231	192	42	78	19	52	26	23
TGIF2LX	TGIF2LX_4	AATATGGAGGCCGCTGCGGA	123	71	51	41	8	30	29	28
ZNF83	ZNF83_5	AATCACTGGAGAATCCACAC	108	20	31	15	1	10	6	16
ZNF225	ZNF225_7	AATCATCAGAGAATCCACAG	73	17	20	23	2	12	4	9
ZNF587B	ZNF587B_2	AATCATCAGAGAGTTCACAG	126	43	13	43	5	13	13	22
MYBL1	MYBL1_4	AATCATGATCGGCATACTGA	279	138	173	173	27	54	66	83
NR2C2	NR2C2_1	AATCCAGATAGTCACCGCAG	85	59	67	61	10	24	13	22
NKX2-8	NKX2-8_4	AATCCAGCCAGGCGGCGCAG	71	109	83	81	8	45	46	52
NANOGNB	NANOGNB_1	AATCCCTCATGCATACTCTC	223	110	77	84	14	22	29	50
ZNF610	ZNF610_6	AATCCCTGGACCCTGGACAG	44	19	11	3	1	7	2	6
ZNF583	ZNF583_7	AATCCTTAAAGCCATGTCCA	39	21	11	43	9	0	16	15
POU2F1	POU2F1_7	AATCTCAACAGCCCAGGCGC	268	110	94	54	12	38	15	27
ZBTB6	ZBTB6_1	AATCTCAACCGACACATCCG	225	122	121	59	10	16	30	32
CREBL2	CREBL2_4	AATCTCAGCAGAACTCAAGC	122	60	23	49	8	29	12	23
GRHL2	GRHL2_6	AATCTCTCCGTCAGAAGCAG	42	58	43	30	4	7	13	20
SOX5	SOX5_4	AATCTGAGTGGAGATTCTGA	67	70	25	51	11	35	14	28
NFE2	NFE2_6	AATCTGGGTGGATTGAGCAG	383	38	6	14	9	44	12	13
FOXK2	FOXK2_4	AATGAAAAGGAAGCTTCAGG	61	33	24	50	10	9	14	12
ZNF613	ZNF613_7	AATGAAATGAACTTCCCCGA	101	69	25	31	3	15	9	5
ZNF285	ZNF285_4	AATGAAGCACTTCTTGCGAA	10	14	9	24	3	7	7	3
TERB1/CCDC79	TERB1/CCDC79_3	AATGAATCTACTACCCCTGG	74	40	45	30	4	19	22	16
ZNF10	ZNF10_2	AATGACAACTCTCTTACTCA	130	123	98	48	15	31	23	34
ZNF324B	ZNF324B_6	AATGACCACACGAGGTCGGG	79	83	123	65	6	37	43	60
ZFX	ZFX_4	AATGACCATGGACACAGAGT	63	4	9	14	0	4	5	2
RUNX2	RUNX2_3	AATGAGCGACGTGAGCCCGG	54	65	61	41	15	21	14	12
ZFP42	ZFP42_5	AATGAGGAGATGCTTTCTCA	13	18	32	33	1	3	20	7
ZNF596	ZNF596_5	AATGATATCCTCGAAGGTCA	159	59	72	94	8	43	21	15
ZNF845	ZNF845_4	AATGCAGCAGGACCTTTAGT	195	145	73	84	34	71	30	73
YY2	YY2_4	AATGCAGGTCAAAACGCTGG	40	18	33	20	0	15	8	4
ZNF148	ZNF148_7	AATGCAGTCTTCCAGGACAA	98	35	15	30	5	14	4	7
ZNF397	ZNF397_2	AATGCCAGAGTTGCACACAA	28	77	129	81	17	30	21	43
ZNF18	ZNF18_7	AATGCCCGTTGACTTGGGGC	56	60	55	48	9	26	13	25
ZNF461	ZNF461_1	AATGCCTGAACCCAGCGCAG	141	40	59	43	3	7	8	7
ZNF611	ZNF611_2	AATGCCTGAACCCTTCACAG	133	68	105	50	7	24	5	35
ZFP30	ZFP30_1	AATGCCTGAACTCATATCAG	133	93	156	77	33	54	32	41
ZNF415	ZNF415_5	AATGCCTGAACTCTACACAG	151	34	32	57	2	16	14	35
ZNF680	ZNF680_1	AATGCCTGGACACTGCACAA	128	32	66	36	9	27	14	10
ZNF695	ZNF695_6	AATGCCTGGACCCAGCTCAG	126	30	8	38	3	2	2	12
ZNF860	ZNF860_6	AATGCCTGGACCCTACGCAG	24	46	6	24	1	3	5	5
ZNF479	ZNF479_3	AATGCCTGGATTGTGCTCAG	15	6	0	13	0	0	2	5
CCDC17	CCDC17_4	AATGCGGCCCTGGATAACAG	63	20	63	58	6	7	8	6
ZNF575	ZNF575_7	AATGCGGGCAAGGATAGGGG	78	16	0	15	0	0	3	6
ZBTB3	ZBTB3_3	AATGCGTGAGGGAGATGCTT	171	41	67	55	5	15	16	34
ZNF556	ZNF556_7	AATGCTATCCTCACCTACTG	93	44	33	30	8	11	11	18
PRDM5	PRDM5_4	AATGCTGGGCATGTACGTGC	186	67	47	18	14	42	8	20
ZNF800	ZNF800_7	AATGCTTCCAATTCACCTGA	212	149	75	48	13	48	17	29
ZNF20	ZNF20_6	AATGGAACTGGAACAAGTGA	123	49	74	24	4	27	8	14
ZNF544	ZNF544_2	AATGGAAGCACGTTCTATGC	51	28	47	13	10	16	6	10
KCNIP3	KCNIP3_7	AATGGACCGGAACCAGGATG	139	88	54	36	17	39	14	30
HDX	HDX_5	AATGGAGACTGGAGATGCTG	136	59	22	32	2	6	11	12
DRGX	DRGX_4	AATGGAGGAAGACAGAGAGA	24	11	8	0	4	1	0	0
ZNF791	ZNF791_4	AATGGAGGTGGAACATCTGA	137	64	84	56	11	27	22	23
HOXA5	HOXA5_3	AATGGCATGGATCTCAGCGT	11	14	6	29	10	24	10	6
ZNF583	ZNF583_5	AATGGCTGAACCCTGCTCAG	51	24	0	18	6	14	9	13
ZNF282	ZNF282_4	AATGGGACATGGACGCCCGG	56	59	12	26	11	24	9	16
HINFP	HINFP_7	AATGGGACTTGATAGAGCAG	165	61	25	27	15	32	2	5
ZNF451	ZNF451_5	AATGGGCAGTGAGCTCCATG	67	7	18	11	0	1	8	6
SKIL	SKIL_2	AATGGGCCAGGAAGAACCTG	22	14	4	23	3	1	5	2
ETV7	ETV7_4	AATGGGCTCGCCAGACTCTG	271	84	21	76	14	28	20	37
PRDM10	PRDM10_4	AATGGGGAAAAGAGTGACGA	127	43	25	26	7	14	2	5
ZNF703	ZNF703_5	AATGGGGCTGACGGGAGTGG	127	68	87	58	6	16	35	30
NR4A2	NR4A2_3	AATGGGGTTGGGCACAGCGA	76	42	15	11	6	16	4	10
ZEB1	ZEB1_4	AATGGGGTTTTCACTGGTGG	191	120	95	53	15	46	28	25
HNF4G	HNF4G_7	AATGGGTCTTGAGACAAATG	17	38	2	52	3	7	9	15
TBX18	TBX18_7	AATGGGTTTGGAAGCCTTGG	81	40	20	39	11	22	15	10
NFAT5	NFAT5_3	AATGGTAGGGCTGGAAGAGG	38	11	0	1	0	2	4	0
GLI2	GLI2_4	AATGGTGGCAAGAGATGCTG	125	68	77	34	9	25	16	21
SKIL	SKIL_7	AATGTAATCAGCCCACAGGA	85	39	76	60	6	7	5	13
ZNF781	ZNF781_2	AATGTAGAAAGACGTTTAGG	53	53	55	79	10	21	25	27
ZNF639	ZNF639_7	AATGTAGTGACTGCTTGATG	121	77	31	80	10	46	22	43
ZBTB8A	ZBTB8A_3	AATGTATTATTCGCTAGTAG	142	108	60	58	13	11	54	84
ZNF609	ZNF609_3	AATGTCAGGCTCAAAGGAGG	92	46	14	18	5	9	19	14
ZNF101	ZNF101_6	AATGTCCTTCTTACCGACCG	74	76	50	42	8	11	7	23
DZIP1	DZIP1_5	AATGTGAACAAACCAGTCGG	38	26	30	28	6	6	4	14
ZNF462	ZNF462_1	AATGTGAATGAGCTACGATG	31	74	117	27	6	28	24	32
ZNF550	ZNF550_6	AATGTGACTCACAGCAACCA	119	85	123	87	11	37	38	57
TBX15	TBX15_4	AATGTGCTGACCTCTGGAAG	49	59	27	36	5	29	11	23
MTF1	MTF1_2	AATGTGCTGCACATAACCCT	64	68	62	73	7	7	4	18
THAP2	THAP2_6	AATGTGCTTGTTGTAGGTAG	122	111	60	76	5	23	25	24
ZNF682	ZNF682_6	AATGTGGAAAAGCCTTTCAC	40	24	54	55	4	19	7	23
ZNF736	ZNF736_3	AATGTGGCAAAGCATCGAGC	11	57	20	6	8	11	13	11
ZNF528	ZNF528_5	AATGTGGCAAAGCATTTCGA	14	25	27	50	5	15	10	28
ZNF493	ZNF493_7	AATGTGGCAAAGCCTTTATC	37	64	49	44	7	25	17	11
ZNF141	ZNF141_7	AATGTGGCAAAGCCTTTGGA	67	14	24	12	2	8	5	13
ZNF534	ZNF534_5	AATGTGGCAAGGTCTTCCGT	219	63	47	55	16	29	10	7
ZNF816	ZNF816_7	AATGTGGCAGGAGTTTCAGT	159	52	54	49	11	21	18	17
ZNF26	ZNF26_6	AATGTGGGAAAGCCTACAGT	113	64	39	56	9	31	11	31
ZNF222	ZNF222_5	AATGTGGGAAGAGCTTCAAA	87	38	20	33	10	16	11	18
ZNF98	ZNF98_6	AATGTGGTAAGGCCTTTAGC	45	33	22	9	1	5	9	16
SP2	SP2_1	AATGTGGTGAAGCTGACAGG	42	32	45	21	0	6	3	2
ZNF43	ZNF43_4	AATGTGGTGAAGCTTTTAGC	77	101	78	62	7	24	24	19
MTERF1	MTERF1_1	AATGTTAGCTTTCACCCGCT	191	196	114	72	26	60	22	34
VEZF1	VEZF1_3	AATGTTTCTGGTGCACCCTG	305	117	83	72	14	30	42	46
FAM200B	FAM200B_2	AATTCCACAGAATCTCATGG	18	23	6	4	0	6	8	12
ZNF578	ZNF578_2	AATTCCTGAACCCTGCGCAG	72	24	17	21	2	5	8	24
ZFP14	ZFP14_6	AATTCCTGGATCCTGCTCAG	0	15	15	8	1	1	3	4
DNTTIP1	DNTTIP1_7	AATTCGCCGGGAAGGCCCCA	287	141	146	115	21	46	28	35
MTERF2	MTERF2_1	AATTCGTAGATTAAAAGGAT	157	47	84	29	16	25	18	20
ZNF436	ZNF436_5	AATTCTCCTGCATAACATCC	100	89	81	104	11	39	12	22
ZNF729	ZNF729_2	AATTCTGCTGAACCGTGTCC	165	97	49	72	7	25	21	33
ZNF99	ZNF99_1	AATTCTGCTGAGCCATGTCC	196	161	107	62	28	55	27	62
ZNF195	ZNF195_5	AATTCTGCTGAGCGAGGTCC	127	69	21	24	3	31	10	21
ZNF679	ZNF679_2	AATTCTGCTGAGCGTGATCC	201	83	52	67	22	26	18	24
ZNF273	ZNF273_7	AATTCTGCTGTGAAGTGTCC	136	82	87	53	15	31	26	46
ZNF33B	ZNF33B_6	AATTCTTCCTCCAGTCTCCA	156	90	52	34	11	18	18	31
ZNF33A	ZNF33A_7	AATTCTTCCTCCTGTTTCCA	248	77	40	27	15	40	18	15
CDC5L	CDC5L_3	AATTGCACGTCAAACTGCCG	196	164	114	62	15	31	27	19
PAX5	PAX5_1	AATTGGAGGATCCAAACCAA	355	163	154	186	2	26	3	18
ZNF518B	ZNF518B_6	AATTGGGAGGAGCTGCACCG	182	76	71	92	7	26	19	19
ZNF286B	ZNF286B_2	AATTGGTTAGAGAAGCAGCA	80	105	43	41	15	44	21	34
ZNF596	ZNF596_4	AATTTCCCACTCACCGGTGA	165	80	52	60	7	7	20	36
ZNF14	ZNF14_7	AATTTGACTGGAACGAAGGA	21	13	9	4	1	0	2	7
POU4F3	POU4F3_7	AATTTGGGTTCTTGCAGCAC	35	46	35	16	3	18	9	11
GTF2B	GTF2B_2	ACAAAAGATCCATCTCGAGT	24	27	25	0	3	10	0	1
ZNF277	ZNF277_3	ACAAAATAAGCAGACTGCAG	193	111	52	71	30	56	34	48
ARID5A	ARID5A_6	ACAAAGCAGTGGAGAAGCTG	75	24	12	22	10	11	11	3
GTF2B	GTF2B_7	ACAAAGGTTGGAACAGAACC	57	11	23	4	2	7	0	2
ZNF70	ZNF70_5	ACAACAAGGGCTTTTCCCAG	57	48	62	31	3	8	4	13
EBF3	EBF3_6	ACAACAATTCCAAACACGGG	47	42	50	63	13	19	30	26
TFEC	TFEC_6	ACAACAGAGAGCCCGAGAAT	78	55	26	14	13	15	4	14
CCDC169-SOHLH2	CCDC169-SOHLH2_6	ACAACATGTCCCTCAAACAC	282	96	72	71	20	42	27	50
MXD4	MXD4_4	ACAACGAGCTAGAAAAGCAC	0	15	0	17	3	8	5	6
NFIL3	NFIL3_2	ACAACTACTTGACACCATCG	192	92	44	29	9	43	13	46
HSF5	HSF5_3	ACAACTTCCCCGCCAAGCTG	85	53	30	50	7	19	23	22
IRF2	IRF2_7	ACAACTTGGCAAATGTCTGG	45	59	84	33	8	16	23	21
ZNF443	ZNF443_1	ACAAGAACTGGAATCAGGGA	96	97	114	65	4	26	13	21
ZNF224	ZNF224_3	ACAAGACAGAAATCTTCCCA	72	35	37	19	2	5	11	20
ZNF684	ZNF684_5	ACAAGAGCCATGGATGGTGG	38	32	9	11	2	1	16	11
ZZZ3	ZZZ3_3	ACAAGGAGTCAGTAGAACAG	156	52	16	55	14	33	9	19
TIGD6	TIGD6_3	ACAAGGGGAACAAGAAGCGT	17	11	24	40	2	15	6	10
ZNF644	ZNF644_6	ACAAGGGTCCTCGAAAGACT	107	55	56	27	2	12	5	8
NPAS2	NPAS2_2	ACAAGTCTGAGAAGAAGCGT	72	11	9	22	0	16	18	13
SATB2	SATB2_6	ACAAGTTGTGGACTAAGCTG	42	53	42	22	17	21	19	11
STAT5B	STAT5B_3	ACAATATATGGCGGATGCAG	54	32	20	9	7	10	5	8
MXD3	MXD3_4	ACAATGAACTGGAGAAGCGC	41	60	39	51	3	8	12	22
ZKSCAN7	ZKSCAN7_6	ACAATGACCACTGCAGGCAG	165	73	48	48	11	24	19	26
DACH1	DACH1_1	ACAATGACTGCACCAACGCA	92	70	57	96	13	20	12	44
GABPA	GABPA_6	ACAATGGCCAAATCCAACTA	47	8	12	6	1	7	2	1
ZSCAN29	ZSCAN29_3	ACAATGTCCAGAAAATGGAG	73	18	6	5	3	12	5	7
NFE2L1	NFE2L1_1	ACAATTACTTCACTGCCCGG	97	118	58	106	12	30	42	60
ZNF827	ZNF827_5	ACACAAAGAAGACACTCCCG	150	104	115	94	27	67	21	28
ZNF763	ZNF763_2	ACACAAGAAAGGAATCACAC	0	0	0	0	0	0	0	0
HSFY2	HSFY2_1	ACACAATGGAGACCTAGTGG	219	117	140	115	24	45	54	79
NKX2-6	NKX2-6_1	ACACACACCACTGGCCAGCG	47	124	70	92	14	43	30	42
ZFPM2	ZFPM2_5	ACACACAGTCAGAGAAACCG	23	22	23	32	1	5	27	26
ZSCAN31	ZSCAN31_3	ACACAGAAGAATCCACACAG	85	72	41	41	10	18	7	6
ZNF581	ZNF581_6	ACACAGCATCACCCACTCGG	101	26	0	21	5	15	3	15
ZNF160	ZNF160_6	ACACAGCTCTTCACAGTCCA	160	95	61	54	2	40	44	72
ZNF177	ZNF177_3	ACACAGTCTGATCTCCAAGG	76	83	55	19	11	30	5	13
ZNF148	ZNF148_4	ACACATGAAAGACTTCCTCA	164	102	91	62	11	22	25	26
ZNF709	ZNF709_1	ACACATGAGAATGCACACAG	117	71	81	31	24	41	13	11
LIN54	LIN54_6	ACACCAGCTTTAAATAGTGG	36	29	34	47	2	2	5	9
GLIS2	GLIS2_1	ACACCATCCAAATAGCGCAG	18	39	39	19	2	7	8	17
DLX1	DLX1_6	ACACCGCCTTGCCCGACACG	99	72	61	48	6	32	24	24
NCOA1	NCOA1_2	ACACCTACCTCCAAAAGAAG	92	61	30	48	6	14	11	14
ZNF329	ZNF329_2	ACACCTGGGAGAGCAACCCA	85	63	123	84	18	18	35	45
HOXD9	HOXD9_2	ACACGAGGCGAACTCGGCGG	10	53	19	31	5	8	9	26
ZNF665	ZNF665_4	ACACGGATTTGCCACCAAAG	55	43	22	11	6	33	3	13
ZNF668	ZNF668_1	ACACGGGCTGCATGAAGCGG	141	43	85	34	7	14	7	12
ETV7	ETV7_1	ACACGTAATCCCACAGCAGG	135	35	49	30	7	9	8	7
CEBPG	CEBPG_3	ACACTAATTCCGTTCACCCC	88	68	56	37	12	18	11	27
FOXN1	FOXN1_1	ACACTATCAGTACCAGCGAA	79	22	54	18	0	11	10	4
ZSCAN5B	ZSCAN5B_7	ACACTCTCATGGGGTCAGGG	206	60	50	64	18	35	18	27
ZNF560	ZNF560_4	ACACTGCCAAGAGTTCTCCA	58	26	16	42	8	8	20	40
YBX3	YBX3_1	ACACTGCGCAGATATTTCCG	117	73	79	53	20	18	32	31
ZNF17	ZNF17_7	ACACTGTCATTCACAAACGA	102	66	53	74	9	21	15	34
ZNF277	ZNF277_2	ACACTTACCAAATGGAGCAG	215	86	134	66	15	25	18	37
ZNF654	ZNF654_6	ACACTTACTGCTTCTAGTGA	120	42	86	48	7	17	31	40
LHX2	LHX2_2	ACACTTCAACCATGCCGACG	99	46	70	45	21	21	25	23
ZNF660	ZNF660_7	ACACTTGAGAACCCACACTA	105	112	31	65	8	24	32	55
BATF	BATF_3	ACAGAACGCGGCTCTACGCA	10	48	9	30	12	16	9	20
ZNF385D	ZNF385D_6	ACAGAAGACAGCACATCCAC	17	72	31	56	4	14	21	48
ESX1	ESX1_2	ACAGAAGCGGAAAACAACGT	177	146	43	38	16	38	17	32
TEAD2	TEAD2_5	ACAGAATCAACTGCATCTGG	38	56	52	85	2	19	27	45
ZNF75D	ZNF75D_4	ACAGAATGTCAAACAGGCTC	88	71	34	22	8	18	15	19
STAT5A	STAT5A_2	ACAGAATGTGCCGGATGCAG	105	68	42	27	5	16	8	12
ZBTB21	ZBTB21_7	ACAGACAAAACAGGTGGCCG	206	59	41	49	6	23	23	15
KAT7	KAT7_3	ACAGACAGTTCAGAAAGTGA	35	17	20	4	6	6	1	4
ZNF792	ZNF792_1	ACAGACTCCGATGGCAGCGG	51	45	66	38	7	7	16	18
POU4F3	POU4F3_3	ACAGACTCGGCGCATGGCCT	94	74	70	41	10	33	10	28
TMF1	TMF1_3	ACAGACTGTGTTAGACAAGG	78	44	47	37	9	13	12	19
NFYC	NFYC_1	ACAGAGAAATGATATCGCCA	14	30	32	7	2	2	0	5
HOXA7	HOXA7_3	ACAGAGAAGCGGCTACGGGG	110	21	31	12	4	2	2	15
ZNF711	ZNF711_3	ACAGAGAGTGAGTACACCAG	58	86	87	57	23	45	25	25
LHX3	LHX3_7	ACAGAGATCCCGCTGTGCGC	83	89	66	42	18	43	24	40
MXD1	MXD1_1	ACAGAGATGCCTTAAAACGG	67	28	18	33	7	20	15	19
LHX4	LHX4_7	ACAGAGATTCCCCAGTGCGC	32	26	34	64	1	10	17	12
FLI1	FLI1_7	ACAGAGCAACGGCCCCAGCC	116	22	21	24	3	12	1	14
USF3/KIAA2018	USF3/KIAA2018_4	ACAGAGCAAGAATATGATCC	142	94	65	62	19	21	25	33
PBX4	PBX4_2	ACAGAGCAGGCTTCATCCGA	46	62	115	20	3	17	18	27
T	T_1	ACAGAGCGCGAACTGCGCGT	117	53	47	75	5	13	27	27
ZNF114	ZNF114_7	ACAGAGGAACCACACAGGCA	97	105	74	31	9	27	5	33
TBX6	TBX6_5	ACAGAGGCCTATGGGAGCGG	61	18	25	33	7	13	18	20
E2F7	E2F7_7	ACAGAGGCGCTTCTGAGCTG	53	14	42	50	4	11	35	29
ETV6	ETV6_6	ACAGAGGGTAGGACTCCTGG	32	7	13	6	6	19	2	0
PLSCR1	PLSCR1_4	ACAGAGGGTTTACTTTGCAG	79	54	70	39	12	16	19	21
NR2C1	NR2C1_3	ACAGATAATTCTCCAGACCA	155	63	61	53	12	12	28	40
BCL11A	BCL11A_2	ACAGATGATGAACCAGACCA	37	13	13	11	0	0	5	5
ESR2	ESR2_2	ACAGATGTGATAACTGGCGA	86	65	27	54	17	39	18	29
TIGD7	TIGD7_6	ACAGATTTCAAAGCTAGCAC	129	66	118	64	3	18	26	31
ZNF280A	ZNF280A_4	ACAGATTTTACAGACAGCAG	89	96	45	53	4	15	18	33
ST18	ST18_5	ACAGCAACCGCAACACCCAC	88	64	39	48	7	14	5	17
ZNF571	ZNF571_5	ACAGCAACTCACGTGGGGCA	68	85	84	31	14	23	12	23
ZBTB4	ZBTB4_1	ACAGCAATGTACACTCGTGG	165	37	21	16	9	4	11	13
STAT3	STAT3_2	ACAGCACCGGCCGATGCTGG	66	36	30	39	12	18	29	54
NCOA1	NCOA1_3	ACAGCACGGAAAAGAGGCGC	51	49	62	33	12	20	9	23
ZNF385B	ZNF385B_2	ACAGCAGAACTACTGTCCAC	110	105	66	78	20	45	19	46
NKX3-2	NKX3-2_2	ACAGCAGACAGCGGGAGCCG	99	85	61	67	14	61	17	12
RORC	RORC_3	ACAGCAGCAACAGGAACCAG	17	15	20	21	4	6	2	11
ZNF189	ZNF189_6	ACAGCAGGAAGTCTACCCTA	117	57	33	46	5	9	4	12
RAX	RAX_5	ACAGCATCGAGGCCATCCTG	66	45	46	24	3	6	0	4
CREB5	CREB5_6	ACAGCCACCCCAGCCCACAG	13	23	17	5	1	2	5	10
ZNF142	ZNF142_4	ACAGCCAGCCAGTAGCACCG	213	101	83	51	11	43	34	63
TRERF1	TRERF1_4	ACAGCCCACCAGTGAAACCA	134	111	67	48	16	44	19	43
DPF3	DPF3_4	ACAGCCCAGAAAGGACCGGA	89	56	20	57	13	43	10	18
ZNF629	ZNF629_7	ACAGCCCCTTAAGCCGCCGG	72	32	59	39	5	34	10	18
ERF	ERF_6	ACAGCCGGGCCACCTCATCA	93	64	40	22	18	43	28	34
FOXJ1	FOXJ1_2	ACAGCCTGACCAGCCTGCAG	70	61	6	17	4	17	2	2
FEZF2	FEZF2_3	ACAGCCTGGTTGATGACCTG	362	165	84	104	41	100	28	41
FOXP3	FOXP3_7	ACAGCCTGTTTGCTGTCCGG	137	138	140	98	39	56	40	87
MLXIPL	MLXIPL_1	ACAGCGACTCGCTGCCCCGG	114	92	31	41	8	15	15	22
ZNF837	ZNF837_4	ACAGCGAGCGGAGTCCCCGA	90	37	36	53	4	18	18	23
THAP9	THAP9_6	ACAGCGCTCAAAATGGATCA	95	81	77	57	7	22	16	23
THRB	THRB_3	ACAGCGGTAGTGATACCCGG	49	27	75	62	6	16	16	55
KLF16	KLF16_4	ACAGCGGTGGCTCTTGGCGG	93	43	22	19	1	10	15	20
GSX1	GSX1_3	ACAGCGTAGGGGAAGAGCGG	45	31	7	9	6	11	1	0
ZNF587	ZNF587_7	ACAGCGTGACTATACATCAG	65	71	44	48	13	23	13	14
TFAP4	TFAP4_1	ACAGCTCAAGCGCTTCATCC	129	86	67	50	9	6	16	24
DMBX1	DMBX1_2	ACAGCTCCAGAAGCAGAAGG	41	7	6	1	1	1	2	0
SIX2	SIX2_7	ACAGCTGCTGCAGCTTGGCG	89	59	93	22	4	21	4	11
C11orf95	C11orf95_7	ACAGCTGGGATGCACACCTG	54	35	42	17	2	4	13	13
STAT3	STAT3_4	ACAGCTTCCCAATGGAGCTG	23	22	11	31	8	20	6	15
SCML4	SCML4_2	ACAGCTTGGCGAGGAAGCGG	127	58	92	51	6	5	25	17
OSR1	OSR1_2	ACAGCTTGGTCACGTCGAGG	38	44	25	9	5	6	4	5
SETDB1	SETDB1_2	ACAGCTTGTCAGCAGGAGGG	117	43	26	23	15	11	10	13
SRY	SRY_3	ACAGCTTTCAGTGCAAAGGA	198	179	116	119	34	58	60	46
ZNF248	ZNF248_4	ACAGGAACAAGTGTCATTCA	147	62	38	44	18	45	27	23
TBPL1	TBPL1_7	ACAGGAAGTATCACAGTAAC	174	78	39	56	16	52	25	38
ZNF432	ZNF432_5	ACAGGAATTGCTGACACTGG	101	28	54	13	3	19	16	20
ZNF235	ZNF235_6	ACAGGACAGAAAACCTACCA	138	83	31	24	17	38	7	7
ZNF155	ZNF155_3	ACAGGACAGAAACCTTCCCA	62	29	36	35	2	12	10	8
PRDM12	PRDM12_4	ACAGGAGCAGAACCTGGAGG	22	31	30	8	5	5	0	0
FOXM1	FOXM1_3	ACAGGAGTCTAATCAAGCAG	136	80	33	65	9	54	44	75
ARNT2	ARNT2_3	ACAGGGAACAAGTCCACCGA	50	46	41	35	5	6	8	12
ZIM3	ZIM3_3	ACAGGGAAGAGTGACCTTCG	76	53	107	37	9	40	20	24
FOXB1	FOXB1_5	ACAGGGAGAACACGCAGCGC	132	71	67	36	5	20	22	19
HOXC12	HOXC12_5	ACAGGGAGCACACGTTGTCG	38	26	77	46	4	7	7	24
ZNF474	ZNF474_5	ACAGGGCAGCAGCTGAGCCT	105	42	60	40	10	8	18	9
SNAI3	SNAI3_1	ACAGGGTCCCCAACTACCGG	263	133	108	82	12	32	46	74
ZNF770	ZNF770_4	ACAGGTCAGAAGATTGCTGG	9	24	5	22	3	2	0	0
ZSCAN4	ZSCAN4_2	ACAGGTCCACGTCCACATGC	147	99	72	60	3	11	18	20
BCL11B	BCL11B_5	ACAGGTGAGCAGGTCAGGGT	52	38	47	18	7	13	11	18
ZNF444	ZNF444_3	ACAGGTGGAAAGGAGGACAG	17	1	0	1	2	2	0	3
TEAD3	TEAD3_7	ACAGGTGGTAGAGAAGGTGG	14	3	0	2	0	0	0	0
ZNF354B	ZNF354B_3	ACAGGTGTCACTGACATTCG	110	81	30	94	17	49	16	28
ZNF211	ZNF211_1	ACAGGTTCCCATAGCTACAG	120	79	71	63	13	23	38	47
ZBTB11	ZBTB11_3	ACAGGTTGACACCAAAGGAG	140	31	39	16	1	0	3	5
FOXO1	FOXO1_1	ACAGGTTGCCCCACGCGTTG	283	122	125	68	17	64	30	52
TGIF2	TGIF2_2	ACAGGTTGGTCTGTCCAGAA	80	50	35	45	2	21	18	18
SATB1	SATB1_6	ACAGGTTTCGACCAACACAG	134	73	73	19	5	15	12	12
ZNF491	ZNF491_4	ACAGTAACTGGAACGAATGA	67	53	4	33	1	0	25	24
ZNF654	ZNF654_4	ACAGTAATGAAGTGGAGCAA	32	35	24	40	10	23	11	16
ATF2	ATF2_4	ACAGTACTTGAGGTTGGTGA	143	57	52	30	17	33	16	25
ZNF566	ZNF566_3	ACAGTATCTCACCTGAGCCA	92	39	7	23	3	11	7	13
KLF11	KLF11_1	ACAGTCCCCACAGACAACTG	40	26	27	22	3	18	9	24
HOXC4	HOXC4_1	ACAGTCCGGAATATTACGGC	97	26	31	15	3	6	13	10
HOXC9	HOXC9_2	ACAGTCCGGCACCAAACCGC	149	59	116	72	3	21	20	35
CENPA	CENPA_4	ACAGTCGGCGGAGACAAGGT	48	25	30	27	1	19	1	2
VDR	VDR_4	ACAGTGATCTGAGCAGGAGG	0	17	14	7	0	0	0	6
GLI2	GLI2_2	ACAGTGGCGTGGAGATGCCG	102	45	48	43	17	19	2	12
PBX2	PBX2_4	ACAGTGGGATCCACCTGCAG	97	39	31	43	4	13	2	8
SREBF1	SREBF1_4	ACAGTGGTGCCAGAGACCAG	45	15	9	11	3	0	5	0
ZNF516	ZNF516_1	ACAGTGGTGTTTGAGTCCGA	47	19	56	14	4	8	3	3
NKX1-1	NKX1-1_1	ACAGTGTCGCTGGCCGCGAG	52	78	14	60	13	42	4	21
BHLHE23	BHLHE23_1	ACAGTGTTTGCAAAGCGCGG	58	69	27	44	7	31	24	20
JUND	JUND_3	ACAGTTCCTCTACCCCAAGG	22	23	7	9	2	2	5	16
SIX1	SIX1_7	ACAGTTGCTGCAGTTTGGGG	77	49	92	31	11	41	12	23
RORB	RORB_4	ACAGTTTCTCTGCCTTGGGC	159	79	67	73	7	16	26	26
HSFX1	HSFX1_2	ACAGTTTCTGTGGAAAGGGG	11	37	20	8	6	24	5	14
CBX2	CBX2_4	ACATAACAGCTGGGAGCCGG	190	65	35	50	5	12	18	13
ZNF397	ZNF397_1	ACATAATCCAGAAAGCGGCG	48	52	63	96	20	25	39	63
ZNF721	ZNF721_7	ACATAGGAGAGTTCACACTA	90	49	65	14	10	29	12	8
GTF2B	GTF2B_4	ACATATAGCCCGTAAAGCTG	39	24	47	18	7	7	4	5
CREBL2	CREBL2_3	ACATATAGCTCTTTCTCGAC	76	7	17	24	3	15	2	11
ZNF404	ZNF404_4	ACATCAACTCACCCGGGCCA	169	89	84	63	18	52	13	45
ZNF232	ZNF232_5	ACATCACCCTAAGAGTGGAG	54	83	55	38	12	16	8	4
TBPL1	TBPL1_5	ACATCACTGTCTGCATCCAT	273	176	141	117	17	52	43	68
ZFP41	ZFP41_4	ACATCAGAAGACGCACACCG	279	214	209	167	34	59	45	68
ZKSCAN8	ZKSCAN8_2	ACATCAGCTAGAGAACGGAG	139	67	75	36	10	18	9	2
ZNF883	ZNF883_6	ACATCAGGGAATTCATTCTG	149	25	38	20	2	8	9	20
ZFP3	ZFP3_1	ACATCAGGGAGATACAACAG	170	32	15	53	3	6	22	33
LIN28B	LIN28B_5	ACATCGACTGGAATATCCAA	244	133	75	57	13	40	28	44
NFATC1	NFATC1_5	ACATCGGGAGGAAGAACACA	36	60	37	68	11	14	21	40
ZNF354A	ZNF354A_6	ACATCTAAGAACCCATACTG	27	20	72	8	6	9	8	23
ZNF578	ZNF578_6	ACATCTACGATGGCATGTCA	232	150	47	144	18	43	50	73
ZNF2	ZNF2_1	ACATCTGATGTCACACACTG	333	213	116	133	21	58	53	44
TEAD1	TEAD1_1	ACATGGTGGATAGATAGCCA	19	8	0	15	1	8	8	4
ZNF696	ZNF696_5	ACATGTCCCCTCACCTGCAA	122	79	32	47	4	10	8	20
ELF1	ELF1_1	ACATGTTCCACAATTACGGC	91	64	23	23	8	28	17	5
THAP2	THAP2_4	ACATTAACATCAGCTTCCAC	82	61	66	76	12	33	16	38
ZFP14	ZFP14_7	ACATTAACTTACATGGGCCA	68	49	30	48	5	8	8	14
ZNF165	ZNF165_5	ACATTACCCAGAGAGTGGAG	64	16	32	14	7	4	3	19
ZNF559	ZNF559_7	ACATTCTCTGAGGTGTGAGG	107	29	30	28	5	8	5	1
ZNF28	ZNF28_5	ACATTCTTCTCAACAGGGCA	145	62	60	20	4	11	10	18
ZNF853	ZNF853_1	ACATTGAAGTTCCAGCACGA	191	183	37	57	41	90	16	17
NFATC2	NFATC2_1	ACATTGGAAGAAAGAACACG	41	29	24	27	7	2	7	28
ZNF182	ZNF182_3	ACCAAACCTCATCCTCAAGT	139	51	60	39	2	20	13	28
MBD4	MBD4_1	ACCAAACTGAGCAGAAGCGA	260	154	56	110	13	56	38	35
ZNF112	ZNF112_1	ACCAAAGGGTTCATGTGGAA	163	81	84	58	22	48	17	27
NKX1-1	NKX1-1_2	ACCAACGGCTACAGCAGCGG	156	109	85	66	10	39	11	24
ZNF454	ZNF454_7	ACCAAGACAGAAGCCTCCAG	75	42	36	30	6	21	11	32
ZSCAN4	ZSCAN4_6	ACCACAAGAGAAGCAAACAT	122	71	54	84	14	32	28	22
HINFP	HINFP_3	ACCACACCAAGCTGAAACAG	114	49	37	46	1	2	36	56
ZNF658	ZNF658_1	ACCACATGAGAACTGACACA	162	62	131	49	9	17	11	23
EBF2	EBF2_7	ACCACGCCTGGGATGTGCCG	33	33	11	36	6	9	12	15
ZNF587B	ZNF587B_3	ACCACGTGGTTCGATGGCGG	69	55	6	56	10	23	40	32
ZNF782	ZNF782_1	ACCAGAACTGATCTTCACAT	51	67	59	62	14	26	14	16
ZNF543	ZNF543_4	ACCAGAGCTGATCTACCAGT	98	87	16	29	12	41	7	19
ZNF33B	ZNF33B_5	ACCAGAGGTGATCTTCAGGC	28	28	30	33	3	16	5	13
E2F6	E2F6_3	ACCAGCGATACATCAAAACG	240	146	120	77	14	43	22	36
ZBED5	ZBED5_1	ACCAGCTTCATTAGTAGCAC	142	136	50	47	9	33	13	36
ZNF418	ZNF418_4	ACCATCATAGCAGGGCACTG	212	96	30	83	14	35	6	29
RORA	RORA_1	ACCATCTCGAGACATCCCTA	125	60	33	23	8	19	5	8
TCF7L1	TCF7L1_7	ACCATGCCCCAGCTCGGCGG	204	145	108	111	20	43	41	37
ZFP90	ZFP90_2	ACCATGTCGACCCTGCTCAG	96	53	95	44	7	15	7	15
HOXA2	HOXA2_6	ACCATTCCCAGCCTGAACCC	185	83	55	50	18	37	38	38
ZNF626	ZNF626_1	ACCATTGCAATTTAGAGATG	37	20	24	11	3	6	6	3
ZNF98	ZNF98_4	ACCATTTCTAGGCTTCCAAG	46	26	11	16	7	16	9	6
ZNF486	ZNF486_2	ACCATTTCTAGGCTTCTAAG	42	37	0	22	5	12	7	3
ZNF697	ZNF697_6	ACCCACAGGACTCAAGGCAC	55	48	72	21	2	13	8	9
ZNF316	ZNF316_7	ACCCAGGAGCGACTTAGCCG	70	21	36	52	3	18	14	23
ZNF43	ZNF43_7	ACCCATAAGATAATTCGCAC	105	40	42	34	9	34	7	10
LHX5	LHX5_7	ACCCCGTACACCTACTACGG	255	45	66	85	8	37	20	29
LYL1	LYL1_1	ACCCCTTACAGTGTCTACAT	124	60	63	90	8	12	33	45
ZNF408	ZNF408_3	ACCCGGAATGGAGGAGGCGG	11	8	43	4	1	6	5	2
SETBP1	SETBP1_1	ACCCGTTGCTCTATCTTCGT	150	111	36	46	10	48	16	32
NFE2	NFE2_3	ACCCTGTTCCTGCTCTGCTG	104	14	16	25	14	21	13	17
SOX1	SOX1_1	ACCGACCTGCACTCGCCCGG	452	320	239	273	44	74	90	113
TCF3	TCF3_2	ACCGAGGATGGAAGACCCGG	72	24	7	28	2	14	7	19
ZBTB45	ZBTB45_3	ACCGATGGCGAGGATGGCGA	57	51	9	27	5	4	5	16
CENPX/STRA13	CENPX/STRA13_6	ACCGCAGAAGCAGCAGTCCG	74	74	91	85	5	19	23	40
HES7	HES7_5	ACCGCAGCCTGGAAGAGCTG	50	31	36	47	5	8	20	25
INSM1	INSM1_1	ACCGCCGCTGGCACAAACCG	120	87	96	53	14	48	20	35
ZNF250	ZNF250_7	ACCGCCTGTGCCCTGCTCAG	73	38	20	47	9	14	4	7
ZNF568	ZNF568_7	ACCGGATGTGATATTCAAGT	112	42	59	69	9	23	33	31
LHX1	LHX1_6	ACCGGCGCTCCAAGGAGCGG	32	49	25	31	2	13	13	14
NR2F6	NR2F6_2	ACCGGGCGTGAAGAGCGCGA	203	125	113	76	17	48	15	21
ZBTB7A	ZBTB7A_1	ACCGTCAGCACAGCCAACGT	94	36	80	12	2	1	1	8
ZNF264	ZNF264_5	ACCGTCCACTCACCTGGGCC	345	150	135	80	27	47	47	60
NR1H4	NR1H4_5	ACCGTGAATGAAGACAGTGA	52	97	51	35	17	38	43	28
ZSCAN5B	ZSCAN5B_6	ACCGTGGAGTGTCTGACCCA	19	7	2	7	5	11	1	9
ZHX2	ZHX2_7	ACCGTGTCGGGAGGCCGCGA	75	88	42	73	23	56	50	59
SPIC	SPIC_1	ACCGTTCTCCAATTATAGAC	46	36	18	44	5	7	11	15
ATF7	ATF7_2	ACCGTTTGTGTGCAATGCCC	47	45	49	56	14	16	19	45
ZFP92	ZFP92_7	ACCTATGTGCAATCCTGCGG	239	204	231	85	38	49	31	63
OSR2	OSR2_4	ACCTATTCCACCCCAAGCAG	115	72	27	41	11	22	19	35
SNAI2	SNAI2_5	ACCTCCTCCAAGGACCACAG	46	31	16	39	2	10	17	18
MNX1	MNX1_7	ACCTCCTGGGGAAGTGCCGC	68	35	34	31	7	18	6	17
ZNF597	ZNF597_6	ACCTCGACTCACCTGGGCCT	252	110	120	95	23	62	36	59
SNAPC2	SNAPC2_6	ACCTCGCCCAGATAGCGCGC	99	56	37	3	0	19	1	3
NFIC	NFIC_1	ACCTCGCTCACGCACGAAGT	22	37	30	15	10	26	2	3
BBX	BBX_1	ACCTCGGCAAACTGAAACAA	223	96	62	33	5	25	17	20
FOXB2	FOXB2_7	ACCTCGGCCGAAAGCAAGGG	45	46	27	50	13	36	13	27
MKX	MKX_5	ACCTCGGCCTGAGACACCGG	99	64	47	51	11	27	6	25
ZNF696	ZNF696_6	ACCTGCAAGGGACTCCATCA	78	46	44	32	5	33	7	21
NOBOX	NOBOX_1	ACCTGGAAAGGTATCCAGAG	55	49	40	35	16	13	21	23
ZNF112	ZNF112_2	ACCTGGCAACAAAGTGCAGG	139	51	71	67	7	39	22	29
BCL6B	BCL6B_4	ACCTGGCCTGGATGAAGCGG	204	125	78	33	9	31	7	14
SETBP1	SETBP1_5	ACCTGGGAAGGGGATCCCGG	50	27	10	7	3	3	1	0
THAP7	THAP7_7	ACCTGTGGAAGGAGATGCCG	68	35	7	20	4	10	6	14
ZNF793	ZNF793_7	ACCTGTGTCATTCAAAGATG	150	72	61	45	19	33	25	13
ZBTB33	ZBTB33_3	ACCTTCTCACAGTAACGGCA	106	46	90	51	20	37	15	33
E2F5	E2F5_3	ACCTTCTGGTACACAACTGG	59	47	53	63	16	30	32	31
ZNF549	ZNF549_4	ACCTTTGAGCTTCATCAAGG	153	64	87	49	9	18	31	35
ZNF317	ZNF317_1	ACGAACAGGTCCAAATTCTG	168	150	210	83	21	66	33	58
LTF	LTF_1	ACGAACTCACTATTATGCCG	139	38	59	65	6	12	16	21
ZNF367	ZNF367_7	ACGAAGCCCCGAGTGCTCGG	150	97	72	116	22	67	37	81
OVOL2	OVOL2_2	ACGACACCTTCGACCTGAAG	36	25	6	17	5	9	8	16
ZNF226	ZNF226_5	ACGACAGCAACCCGAAGACA	0	19	41	3	1	6	0	8
HES6	HES6_5	ACGAGAGCCTGCAGGAGCTG	49	26	47	28	6	16	14	17
TGIF1	TGIF1_1	ACGAGCCAAAACTGATCCCG	205	107	151	48	8	3	20	19
GRHL3	GRHL3_4	ACGAGCGGAAGCAGTTCCGG	103	45	26	36	11	26	27	33
TWIST1	TWIST1_3	ACGAGGAGCTGCAGACGCAG	27	13	5	20	1	2	2	0
ZNF691	ZNF691_1	ACGCACCAGCAAGATCACCT	74	78	110	32	10	23	18	23
ZNF575	ZNF575_1	ACGCACCGCTTAGCACACGG	292	88	100	36	18	33	15	15
NACC2	NACC2_4	ACGCAGGAGCGGCTCTCCAG	102	91	22	39	11	50	13	8
EGR1	EGR1_1	ACGCCCTTACGCTTGCCCAG	92	74	110	38	9	18	18	36
NKX6-2	NKX6-2_6	ACGCCGGGCCAGAAGATGGG	53	47	35	56	6	22	20	23
TCF24	TCF24_1	ACGCGAGTCGCGGATGGCGG	144	51	39	69	10	29	24	32
THAP7	THAP7_2	ACGCGCGAGACGCGCAACCG	103	16	11	7	6	8	6	5
ZNF17	ZNF17_5	ACGCGGCACCCACCTCAGTC	133	116	52	72	9	38	10	24
ZNF180	ZNF180_3	ACGCGGGAAGCTGGAAGCGG	84	39	38	38	1	11	10	6
LCORL	LCORL_7	ACGCGGGACGCAGATGGACA	111	42	78	38	31	38	32	26
FOXE3	FOXE3_7	ACGCTGAACAGACGCGCGGG	169	162	69	82	29	73	49	53
MSX1	MSX1_7	ACGCTGAAGGGCAGGAGCGA	74	43	20	45	5	28	3	16
TFCP2L1	TFCP2L1_4	ACGCTGACCTACCTCAACCA	107	69	99	116	8	22	46	61
ZNF749	ZNF749_7	ACGCTGCACGCACCTCGGTC	257	145	72	89	25	33	45	33
NKX3-1	NKX3-1_3	ACGCTGGCAGAGACCGAGCC	38	26	42	30	7	18	23	10
HOXA10	HOXA10_7	ACGCTGGCTTGCGGCAGCGG	87	28	40	32	1	0	11	24
OSR1	OSR1_6	ACGCTGTGCACCTGCATCAG	133	79	77	44	18	34	17	5
UBP1	UBP1_1	ACGCTTACTTATTTGAACCA	99	68	27	31	10	23	7	13
ZNF610	ZNF610_1	ACGCTTGACATTCATGGACG	153	80	193	46	11	39	35	44
ZFP91	ZFP91_3	ACGGACAAGCCCCGATGCCG	53	23	23	21	6	11	13	26
ZNF644	ZNF644_3	ACGGACTGGAGCTGGCATGG	111	37	61	27	10	14	9	31
DPF1	DPF1_3	ACGGAGACTCAACATCCTGG	39	37	28	23	1	7	7	12
HOXC11	HOXC11_3	ACGGAGAGCAGAAGTTGCCC	163	86	60	44	13	30	41	48
NEUROD2	NEUROD2_1	ACGGCGAAGACGACGAGCCG	56	32	56	28	4	6	11	15
MXD3	MXD3_5	ACGGCGCAGCAGGCTCAGCG	129	99	56	49	20	19	18	7
XPA	XPA_3	ACGGCGGCTGCGGCTACTGG	104	63	12	16	10	21	15	19
NFATC4	NFATC4_6	ACGGCGGGACAGAGCTGGGG	50	9	12	16	1	3	5	13
ATOH1	ATOH1_7	ACGGCTAGCAGCCAACGCCA	118	94	78	43	16	42	18	41
ZNF296	ZNF296_6	ACGGGAAGGTCTGCAGGCAG	292	57	45	91	7	31	45	59
ZNF548	ZNF548_4	ACGGGACACCCACCTCAGTC	422	283	171	207	35	97	81	130
ZNF791	ZNF791_3	ACGGGAGAGAGACTCTGTGA	63	18	38	39	3	15	16	12
MAX	MAX_6	ACGGGCTCATCATAATGCAC	103	16	38	10	3	2	1	6
MLX	MLX_3	ACGGGGCTTGCCTTGACCCA	43	57	33	23	6	13	11	11
POU4F1	POU4F1_4	ACGGGTACTTGTGCTCAGGG	117	79	69	67	18	31	13	15
BHLHA15	BHLHA15_3	ACGGGTCCCTGCCGAACCCG	93	92	55	4	13	11	5	9
ZBTB44	ZBTB44_1	ACGGGTGAATCGCACCCCGC	142	67	17	14	13	37	10	21
THAP9	THAP9_5	ACGGGTGCTGCAGCCCACTG	25	26	28	16	3	12	9	22
ZBED9	ZBED9_2	ACGGTATTACTTACACAGTG	75	87	71	45	24	26	18	26
ATMIN	ATMIN_6	ACGGTCTCTCAGGGCCTCTG	159	125	77	113	7	24	26	43
HMGN3	HMGN3_5	ACGGTCTGCCAGATTGTCAG	186	100	38	100	16	40	24	48
ATF7	ATF7_3	ACGTACCTGTCCACAGCCCG	91	29	12	18	3	4	9	3
DBP	DBP_1	ACGTACTCCACATCGCCGAA	122	73	47	29	19	37	20	13
ZNF846	ZNF846_5	ACGTAGTCTCATGTCTGGAT	160	111	131	54	14	18	29	34
TBX22	TBX22_1	ACGTCTATCACAGCTCACAG	20	56	19	20	5	23	13	8
PRDM12	PRDM12_3	ACGTCTTGGAGAAGATGCCG	89	51	82	35	8	22	30	46
ZNF814	ZNF814_1	ACGTGGTTCGATGGCTGCCG	136	108	44	46	16	50	18	23
MBD1	MBD1_1	ACGTTGTGCAAAGACTGTCG	160	91	45	34	14	39	38	43
CHCHD3	CHCHD3_7	ACTAAAGCAAGCCAAAGAGC	16	30	10	13	8	12	1	2
BHLHE23	BHLHE23_3	ACTAAGCCACGGCTACGCGG	69	81	45	32	5	2	13	28
NFYB	NFYB_4	ACTAAGTGAAGAGCTTACAG	113	74	79	19	8	23	12	12
HOXC9	HOXC9_1	ACTACATGTACGGCTCGCCC	62	76	51	48	11	32	4	14
ALX4	ALX4_1	ACTACCCAGACGTGTATGCG	90	23	35	47	3	17	9	9
ZNF287	ZNF287_2	ACTACGATGATAGACTAGAG	77	48	19	31	9	18	13	8
SP1	SP1_7	ACTACTACCACCAGCAACAT	171	92	76	61	9	17	20	19
MTERF3	MTERF3_1	ACTACTTGAGCTAGTAGACT	23	56	40	27	6	10	9	6
ASH1L	ASH1L_7	ACTAGAGACACACATACTGG	83	48	30	35	13	12	20	21
ZNF107	ZNF107_3	ACTCAAACCTAATTAACCAT	145	106	100	45	16	37	17	27
THAP12/PRKRIR	THAP12/PRKRIR_6	ACTCAAATTCAATACGTCGG	42	87	44	29	13	25	16	17
WIZ	WIZ_7	ACTCACCACAGAACTCGCAG	124	80	80	37	7	20	14	11
ZNF77	ZNF77_7	ACTCACCTCAGATGCCTCTG	242	79	60	85	15	29	21	45
NFE2	NFE2_1	ACTCACCTGCAGCTCGGTGA	90	87	68	34	10	39	21	11
SNAI2	SNAI2_1	ACTCACTCGCCCCAAAGATG	252	158	85	142	14	39	53	86
ZNF772	ZNF772_2	ACTCAGAAGGCTTACCCCTG	61	33	14	47	14	18	4	7
ZNF594	ZNF594_7	ACTCCAAAGACAAATCACCC	86	38	31	22	11	33	9	10
ZNF420	ZNF420_3	ACTCCAATTTACCCGAGCCA	53	98	71	79	12	27	17	31
ZNF747	ZNF747_1	ACTCCACACGCAGCTCCCAG	109	58	15	20	8	25	6	10
FOXD4L5	FOXD4L5_5	ACTCCAGCCGGGGCTGCAGG	12	5	0	6	0	0	0	2
ZFP69	ZFP69_1	ACTCCCGACAGCAGAATCCC	194	104	119	81	21	45	22	31
TSHZ1	TSHZ1_4	ACTCCGAGAAGACCAAGAGG	148	32	57	26	5	23	8	13
ZNF396	ZNF396_5	ACTCCTAACACAAACTTCAG	193	129	102	82	19	30	49	45
TSC22D1	TSC22D1_1	ACTCCTAGATCCATCGCCAC	232	102	75	90	13	28	23	47
ZNF770	ZNF770_2	ACTCCTAGCACGCTTAAGCT	168	140	144	106	7	40	33	52
GTF2I	GTF2I_1	ACTCCTCATCTTCAACGGGG	122	45	67	37	5	9	16	6
ATF5	ATF5_5	ACTCCTGGCGACCCTGGGGC	109	65	44	31	6	37	7	18
TIGD2	TIGD2_1	ACTCGATTTAAGCAGCGCCA	97	64	90	54	16	30	23	22
ZBTB20	ZBTB20_5	ACTCGGGCCAGGACACGCCG	83	37	75	77	7	36	29	25
ZNF69	ZNF69_6	ACTCTACAAGGAAGTGATGC	26	12	1	9	0	5	3	4
ZNF214	ZNF214_5	ACTCTACAGGGAGGTCATGT	136	91	40	44	13	32	24	29
POU3F4	POU3F4_7	ACTCTGCGGGCATGCAGCAG	2	9	51	26	3	14	14	12
ZNF562	ZNF562_6	ACTCTGTGAGAATTGTGGAG	14	14	13	44	5	14	9	12
DR1	DR1_1	ACTCTTCTTCAGGAATGCCA	85	34	89	34	4	5	6	17
ZSCAN22	ZSCAN22_4	ACTGACAGCACAGCGCTCGG	188	115	80	42	15	35	13	20
ZNF165	ZNF165_3	ACTGACAGCAGAGCTCCCGG	86	40	32	39	8	20	6	10
IKZF4	IKZF4_5	ACTGACCTGAGTGTGTGCGG	54	40	34	44	8	24	10	20
SMAD3	SMAD3_2	ACTGACCTGCGTCCATGCTG	214	100	118	106	14	52	37	34
LBX1	LBX1_1	ACTGACGCCGTTCAGCATCG	15	28	26	22	8	13	15	18
ZFP2	ZFP2_3	ACTGAGATGAGAGTATGTGG	116	71	9	33	11	35	18	36
PHF1	PHF1_2	ACTGATGGGCTGCTATACTT	145	61	56	37	13	29	11	33
ZNF554	ZNF554_6	ACTGATGTGGGGATTAAAGA	23	18	29	20	2	6	2	14
MEF2D	MEF2D_6	ACTGCACTCACCAACAGGGC	168	74	51	33	10	22	1	13
PITX1	PITX1_1	ACTGCAGAGAAGGAGCGCGG	55	63	43	17	8	12	20	11
SP3	SP3_1	ACTGCAGGCATTAATGCCGA	89	17	3	9	6	22	4	3
USF3/KIAA2018	USF3/KIAA2018_7	ACTGCCACTAAAGTGCACCA	279	135	130	188	13	63	45	71
ZSCAN1	ZSCAN1_2	ACTGCCGGAAGCGCAGACGC	27	47	26	64	5	16	12	35
ZNF383	ZNF383_3	ACTGCCTGGACCCTGTTCAG	63	25	40	37	2	2	6	11
AKAP8L	AKAP8L_2	ACTGCGGGCCACCATGAGGG	61	30	18	40	11	13	11	4
ESX1	ESX1_4	ACTGCGTGAACGCGGTGCGG	117	140	120	96	12	29	37	46
ZNF417	ZNF417_6	ACTGCGTGACTATACATCAG	181	64	40	49	4	30	32	60
DLX4	DLX4_2	ACTGCGTGTGCTGGAAACGC	14	17	22	7	5	5	7	6
ZNF143	ZNF143_2	ACTGCTAAATCTCAACAGAG	142	71	52	27	8	25	15	21
ELK4	ELK4_5	ACTGCTCGTGATCACAAGGG	66	29	45	27	7	26	7	9
ZNF696	ZNF696_3	ACTGCTCTCTTTAGCACCTG	280	143	45	45	29	62	26	27
ZXDC	ZXDC_6	ACTGCTGGCTCCAATCAAGG	88	67	30	43	3	13	13	18
ARNT	ARNT_4	ACTGGCAACACATCCACTGA	9	45	18	32	6	16	29	27
MBD1	MBD1_6	ACTGGCGCCTGAGACCAGGG	4	7	11	3	2	1	0	2
SP2	SP2_2	ACTGGGACTCACAGCAGCAG	62	46	15	45	11	23	9	15
MYF6	MYF6_7	ACTGGGAGCTGCAGGTGCGC	183	61	73	69	6	18	35	38
TFE3	TFE3_2	ACTGGGGAAGGGAGCCGCGG	73	22	25	8	2	7	4	3
CRX	CRX_6	ACTGGGGCCACTTAGGGCCA	129	61	99	46	10	28	29	39
EPAS1	EPAS1_5	ACTGGGGCTGCAGGTTGCGA	131	43	41	36	11	20	5	14
MYBL2	MYBL2_7	ACTGGGGTGGATGTCAGCGA	23	27	32	10	10	7	8	20
T	T_5	ACTGGGTCTCAGGGAAGCAG	47	30	29	11	3	6	3	0
ARGFX	ARGFX_2	ACTGGTAGAACTCTCAGTGA	50	21	0	21	5	10	0	5
ZNF529	ZNF529_6	ACTGGTGACACTCAGGGATG	88	6	19	19	0	6	4	21
ZNF565	ZNF565_7	ACTGGTGACATTCAGGGACG	42	25	22	9	0	1	2	0
ZNF225	ZNF225_1	ACTGTACCGAGAAGTGATGC	4	14	47	20	3	1	3	3
ZBTB38	ZBTB38_4	ACTGTAGCTGATCACAGAGG	3	4	23	44	0	6	0	2
ZNF865	ZNF865_5	ACTGTATGGGGAACACGCCA	60	73	35	48	8	21	13	43
ATF3	ATF3_5	ACTGTCAGCGACAGACCCCT	135	97	30	55	26	28	14	35
ELF1	ELF1_6	ACTGTCCTCAAAACTTCTGA	115	76	42	31	6	27	13	14
SNAI1	SNAI1_6	ACTGTCCTCATCTGACAGGG	85	56	37	35	5	25	27	32
ZFP57	ZFP57_4	ACTGTCTAGATGCCAGCCAG	44	48	77	58	5	19	16	14
ZNF540	ZNF540_3	ACTGTGACTTACATGGGCCA	36	34	13	29	3	11	10	8
ZNF711	ZNF711_5	ACTGTGATTCAAGCAGCTGG	90	85	61	35	22	45	14	18
ZNF488	ZNF488_7	ACTGTGGCTGGAGCATACCC	47	50	21	24	7	7	13	8
ZNF345	ZNF345_4	ACTGTGGGAAGGCTTATGGG	42	9	21	2	2	0	0	0
ZNF510	ZNF510_5	ACTGTGGGCCAACTTGCAGA	60	45	23	45	4	12	15	60
HOXA3	HOXA3_4	ACTGTGGGTGAGTTGAGCAG	14	7	0	2	1	3	0	4
POU2AF1	POU2AF1_1	ACTGTGGTGTAGGTCGCCAG	89	76	57	28	22	29	5	6
IRF9	IRF9_4	ACTGTGTCCGCAGGAGGAGG	69	27	72	14	7	11	6	8
DLX6	DLX6_4	ACTGTGTCTGCTGAAAGCGA	12	45	30	46	7	19	16	23
ZNF707	ZNF707_2	ACTGTTCCAGGCGAGAGACG	91	35	28	64	15	26	11	11
HNF4G	HNF4G_3	ACTGTTGAGAGCTCACGCAG	26	82	24	37	14	39	21	40
NR3C2	NR3C2_4	ACTGTTGTTTGGAATAGCAC	241	105	128	88	14	56	34	43
ZNF155	ZNF155_1	ACTGTTTACACTTCCCACCC	0	0	0	0	0	0	0	0
SP9	SP9_1	ACTTACCCCGAGTATAGACG	35	21	0	9	7	7	6	9
WT1	WT1_6	ACTTCAAGGACTGTGAACGA	182	112	35	78	24	46	52	71
HOXA11	HOXA11_1	ACTTCAAGTTCGGACAGCGG	100	86	49	68	12	18	27	35
ZNF480	ZNF480_5	ACTTCACTCTCACCAGACCA	198	140	78	72	18	54	15	35
ZNF880	ZNF880_4	ACTTCACTCTGCAGATTCCG	123	141	71	46	27	53	10	17
MYRFL	MYRFL_2	ACTTCAGAGCAGGAGAGCAC	45	81	20	31	11	21	19	8
THAP8	THAP8_3	ACTTCAGGTTGTGACCGCTC	156	104	54	44	20	34	35	54
RFX8	RFX8_6	ACTTCAGTCATGCCTAGAGG	112	53	54	39	10	24	20	25
SP110	SP110_2	ACTTCATGCACCAGAAGCTG	85	29	52	22	0	0	2	4
ZNF140	ZNF140_7	ACTTCCCTTTTCCCCAGCCA	209	118	78	85	8	30	12	25
ZNF829	ZNF829_3	ACTTCTACAAGCAGTATCCA	216	128	45	57	22	45	32	23
ZNF354C	ZNF354C_7	ACTTCTCTTTCCACCATGCA	178	71	103	64	6	36	12	23
RFX3	RFX3_6	ACTTGCTGTACCACCTGCGT	179	114	133	48	20	79	21	23
ZNF219	ZNF219_3	ACTTGGCAGCGGAACTCCGG	159	123	67	50	15	23	38	35
ZNF841	ZNF841_5	ACTTGGCTCACCACAGTCCA	81	52	47	75	4	11	25	25
ZSCAN23	ZSCAN23_1	ACTTGGGTATAATTTGCGAG	52	56	36	79	6	27	22	30
MITF	MITF_6	ACTTGGTGGGGTTTTCGAGG	113	49	18	33	12	11	2	8
PGR	PGR_2	ACTTGTCAGCAAAGAACTGG	83	23	50	8	3	22	7	14
ATF1	ATF1_3	ACTTGTGCCCAGCAATCAGG	140	63	18	73	12	29	14	22
ZNF223	ZNF223_7	ACTTTTCCTCCCTTAGAAAG	110	21	49	18	13	22	7	8
ZNF221	ZNF221_5	ACTTTTCCTTCCCTAAGAAG	28	25	29	31	10	21	5	9
ZNF394	ZNF394_5	ACTTTTGCCCGTGAAAGTGG	115	31	16	26	2	4	8	11
ZNF345	ZNF345_5	AGAAAACAGGGATCTCAGGA	75	75	50	38	8	10	15	10
ZEB2	ZEB2_6	AGAAAACTGGAGGAACGCGA	35	5	0	15	2	1	1	0
ZNF331	ZNF331_5	AGAAAAGTCTATGGCTACGT	92	61	33	20	9	17	2	2
NANOGNB	NANOGNB_3	AGAAACAATCAGCTATGCCT	47	72	67	20	9	15	8	24
GCM1	GCM1_7	AGAAACCAAGTTAGAAGCTG	217	141	157	119	30	53	66	100
ZMAT1	ZMAT1_7	AGAAAGAAGAACGTAAGCAC	22	27	23	17	2	0	3	5
ZSCAN16	ZSCAN16_2	AGAAAGACGGGACATACTCA	52	41	33	21	7	10	3	12
SRCAP	SRCAP_6	AGAAAGAGGAACGGGCCCGG	114	43	137	77	1	5	5	9
PITX2	PITX2_2	AGAAAGATAAAAGCCAGCAG	17	7	16	2	1	4	5	0
TMF1	TMF1_4	AGAAAGATGAGCAGATCCGA	126	31	10	26	5	8	10	24
SP140L	SP140L_5	AGAAAGCCCGGAAGCAAGGA	101	55	31	54	14	28	58	70
ZNF652	ZNF652_1	AGAAAGTCAGCGTTACACAA	152	34	57	38	4	15	21	30
EEA1	EEA1_2	AGAAAGTCATAAACAAGCCC	55	33	19	62	11	17	2	18
ZNF121	ZNF121_5	AGAAAGTGTCTCTCCAGCAG	113	57	20	43	8	15	27	25
ZNF141	ZNF141_4	AGAAAGTTCATACTGGAGAG	89	40	60	41	4	23	5	20
MYB	MYB_1	AGAAATACGGTCCGAAACGT	80	37	21	32	7	11	13	4
ONECUT2	ONECUT2_4	AGAAATCAACACCAAAGAGG	0	20	2	5	1	2	12	1
ZNF22	ZNF22_1	AGAACAAGCGCAAAACAGGC	51	60	42	17	1	5	12	3
TBPL1	TBPL1_1	AGAACAATAGACCTCATGCC	132	94	34	89	20	31	48	65
STAT1	STAT1_1	AGAACACGAGACCAATGGTG	102	55	13	60	13	15	11	22
CHCHD3	CHCHD3_3	AGAACAGCTGGCTAGACTGG	65	64	51	7	5	19	3	3
NR1I3	NR1I3_4	AGAACAGTCAGCAAAAGCAT	13	10	5	10	5	8	8	9
NCOA2	NCOA2_4	AGAACCACCAAACCTGCCCA	307	219	340	144	22	61	39	66
PHF20	PHF20_1	AGAACCACTCATCATAACGA	154	48	32	57	5	25	12	39
NR1D2	NR1D2_7	AGAACCCTCACTGTGACAAG	81	38	29	32	6	35	12	24
TLX2	TLX2_7	AGAACCGACGCACCAAGTGG	24	12	0	3	0	3	1	6
TLX1	TLX1_4	AGAACCGGCGGACAAAGTGG	95	74	80	49	17	43	40	45
THRB	THRB_2	AGAACCGGGAGAAAAGACGG	136	40	50	32	3	20	9	12
PBX3	PBX3_3	AGAACCTCCAGAGGCTGCCG	154	97	51	60	13	27	20	30
LHX1	LHX1_4	AGAACCTGGGCGCCAAGCGG	151	66	136	53	13	19	29	50
ZNF770	ZNF770_3	AGAACGACCACAAGGGAAAG	239	142	62	117	23	49	37	79
ZNF160	ZNF160_2	AGAACGCCGGAATGTGTCAA	313	101	79	82	13	20	22	45
TFDP2	TFDP2_6	AGAACGGATAAAGCAGAAGC	44	20	6	26	18	29	15	10
MAZ	MAZ_2	AGAACGGCTACAATCTCCGG	68	74	45	19	8	31	6	6
TBP	TBP_3	AGAACTGAAAATCAGTGCCG	0	25	19	3	1	7	0	0
ZNF695	ZNF695_1	AGAACTGATCATCTGTCTGG	69	54	29	55	9	42	25	37
EBF4	EBF4_1	AGAACTGCCTGAAGAATGCG	42	55	30	28	2	4	3	9
ZNF500	ZNF500_1	AGAACTGTCCCCCTATCCCG	100	60	67	38	13	29	10	16
ATF2	ATF2_5	AGAACTTGTAAGCAGCACAT	191	119	50	33	27	56	16	23
CEBPZ	CEBPZ_3	AGAAGAAAGCCAAATACCAG	98	10	6	15	5	3	0	0
ZNF33B	ZNF33B_4	AGAAGAACCATGGAGACTGG	104	69	37	71	13	20	46	36
ZNF207	ZNF207_4	AGAAGAAGCAGCTGAAGCCG	64	65	68	16	9	17	15	16
L3MBTL1	L3MBTL1_6	AGAAGAAGGAAAGGACCCAG	31	51	63	22	1	11	8	13
STAT5A	STAT5A_7	AGAAGACCTCATCCTTGGGG	16	24	29	27	9	10	16	17
NFIL3	NFIL3_7	AGAAGACTCCACAACAGGTG	47	83	33	50	9	15	29	38
ZNF33A	ZNF33A_4	AGAAGAGCCATGGAAACAGG	52	39	41	35	6	16	2	10
ZNF334	ZNF334_4	AGAAGAGCCATGGATAGTGG	47	65	21	49	5	15	14	33
ZNF300	ZNF300_4	AGAAGAGCCATGGATCATAA	201	73	93	38	7	28	23	6
USF2	USF2_2	AGAAGAGCCCAGCACAACGA	94	49	32	42	2	6	5	10
ZNF500	ZNF500_7	AGAAGAGCCGGAAGAGCTGG	26	43	13	28	11	8	9	8
ZNF268	ZNF268_3	AGAAGAGCTGTGTATGGTGC	31	37	11	9	8	14	10	23
ZNF837	ZNF837_6	AGAAGAGGCCCGAGGAGCCG	58	39	50	16	1	18	9	5
PURA	PURA_4	AGAAGATTCAAGAGAAGCAG	44	26	10	33	6	14	17	8
MNT	MNT_6	AGAAGATTGCCACGCAGCAG	121	50	123	66	2	11	9	14
ZNF793	ZNF793_6	AGAAGCACCATGGATTGGTG	41	25	35	12	9	13	5	4
ZNF503	ZNF503_3	AGAAGCAGTAAGCACAGCGG	170	114	140	119	23	50	49	66
MSX1	MSX1_5	AGAAGCCCGAGAGGACCCCG	130	90	48	27	5	20	9	15
CDX2	CDX2_5	AGAAGCGCAGGAAGGCGCGG	26	31	19	34	1	13	12	13
SMAD3	SMAD3_1	AGAAGCGCTCCGAATTGGAG	45	39	64	28	2	7	14	19
PITX2	PITX2_4	AGAAGCGGCAAAGGCGGCAG	97	58	17	51	9	21	26	19
RORA	RORA_7	AGAAGCTATACAGTATGTGG	32	49	45	62	11	29	36	38
ZNF268	ZNF268_1	AGAAGCTGTCCGGACCCTGG	152	103	100	104	15	27	32	54
ZFP82	ZFP82_1	AGAAGCTTAATAGTGCTGAC	97	46	75	31	9	9	18	22
ATF3	ATF3_6	AGAAGGCACTCACTTTCTGC	126	44	72	33	10	21	22	14
ZNF398	ZNF398_3	AGAAGGGGAACATAATACAG	73	19	30	5	5	14	7	0
MECP2	MECP2_5	AGAAGGGTCAGGCTCCGCCC	121	46	29	19	7	10	8	8
MYBL2	MYBL2_1	AGAAGTATGGCACAAAGCAG	7	38	8	10	3	1	2	6
MSX1	MSX1_6	AGAAGTCATGTCAGCAGCCG	156	97	116	54	15	41	37	52
POU2F1	POU2F1_2	AGAATCAACCCACCAAGCAG	29	21	39	35	4	12	13	10
ISX	ISX_1	AGAATCAGCGAGCCAAGTGG	208	118	116	131	25	46	45	67
HHEX	HHEX_6	AGAATCGACGCGCTAAATGG	21	59	45	25	9	21	1	11
HSFY2	HSFY2_5	AGAATCGTCTGTCTTAAGCA	288	141	85	104	29	44	26	35
ZNF101	ZNF101_4	AGAATCTGTACCAAAACCTG	47	52	62	57	12	25	5	32
CDC5L	CDC5L_6	AGAATGGTCCAGAGAAGAAG	15	0	7	3	1	0	4	0
ZHX1	ZHX1_6	AGAATTAACAACTGGGACAG	146	108	56	46	20	33	25	17
FOXJ1	FOXJ1_6	AGAATTCCTGCAGCCACTGC	173	78	29	47	10	23	13	19
SOX5	SOX5_1	AGAATTTATAGGGAATCCCG	181	49	39	24	6	11	19	13
FOXD4L3	FOXD4L3_3	AGAATTTGTCCCCGACCGCG	77	16	43	4	2	3	0	0
ZSCAN18	ZSCAN18_1	AGACAAATTCCCGGAAACGC	75	27	40	57	3	5	15	24
ZNF404	ZNF404_2	AGACAACAGAGACCTAAAGT	10	12	35	37	3	7	6	11
YBX3	YBX3_2	AGACAACGTACATTCCGGGG	46	33	0	19	2	8	1	6
ZNF234	ZNF234_7	AGACAAGATCCAAAGTGAGG	80	59	56	27	13	39	14	15
ZNF433	ZNF433_1	AGACACAGGATAATGCACCG	163	135	214	91	23	71	33	41
ZNF442	ZNF442_1	AGACACATAATAGTACAACG	87	94	80	60	13	38	29	30
ZNF136	ZNF136_7	AGACACATCAAAGATCACAG	61	38	59	28	11	25	4	33
ZNF563	ZNF563_4	AGACACATGGTAGTGCAAGG	103	32	38	59	11	25	16	19
ZNF439	ZNF439_1	AGACACATGGTAGTGCACAG	0	15	0	8	4	12	3	4
TBX15	TBX15_5	AGACACCTGGATGAGACAGG	2	23	5	13	5	3	1	6
GLMP	GLMP_1	AGACACCTGTCAGCTAGAGG	107	46	53	57	7	7	4	13
HNF1A	HNF1A_1	AGACACGCACCTCCGTGACG	66	45	67	43	23	59	30	64
ZNF562	ZNF562_2	AGACAGCATCAGTGTGCACA	186	123	47	71	26	49	44	50
ZNF670	ZNF670_1	AGACAGGATGTGCCTATGAA	158	98	60	24	33	60	16	13
ZNF132	ZNF132_1	AGACAGGGCATTACCAAGTG	0	0	0	0	1	0	0	1
MEIS3	MEIS3_2	AGACAGTGCCCGCAGTACCA	262	59	8	76	8	26	16	24
HIVEP1	HIVEP1_4	AGACAGTGGGGAGAGCGAGG	5	8	13	18	0	3	2	14
ZNF502	ZNF502_3	AGACATCAGAAACTTCACAG	105	32	46	10	12	11	8	2
ZNF441	ZNF441_5	AGACATGAAAGAACACACAG	52	31	32	14	8	11	12	15
ZNF813	ZNF813_3	AGACATGAAAGTCATCACAC	108	62	61	11	9	30	6	15
ZNF705E	ZNF705E_2	AGACATGAGAAAACTCACAC	42	19	0	3	0	2	0	0
ZNF280C	ZNF280C_3	AGACCCACCATCAAATCCAG	239	82	72	36	19	35	14	17
HMGA2	HMGA2_5	AGACCCAGGGGAAGACCCAA	80	93	52	26	8	11	20	14
NFE2L1	NFE2L1_7	AGACCCAGTTCCACAACCTG	139	85	23	87	12	41	16	17
DBX1	DBX1_1	AGACCCTTCGAAGTAGGGAA	2	13	42	38	4	21	2	3
BHLHE40	BHLHE40_6	AGACCTACAAATTGCCGCAC	61	59	8	35	15	32	3	11
ZNF214	ZNF214_7	AGACCTACTGAGAGATTCAA	147	87	34	46	10	35	18	25
NKX3-2	NKX3-2_4	AGACCTAGAGGAGGAAGCCG	14	7	21	4	1	1	0	1
TEAD4	TEAD4_7	AGACCTCAACACCAACATCG	283	166	112	165	29	80	73	107
ETV3L	ETV3L_3	AGACCTCTGGGGATAAGAAG	9	6	0	0	1	2	0	0
SPI1	SPI1_1	AGACCTGGTGCCCTATGACA	66	64	53	44	17	36	9	17
GATA1	GATA1_3	AGACGACCACCACGACACTG	176	142	30	68	24	29	33	60
YBX1	YBX1_1	AGACGCTATCCACGTCGTAG	12	6	0	3	0	1	2	3
DLX5	DLX5_1	AGACGGATGGTGCATAGCTG	52	19	6	9	4	12	2	0
ZSCAN1	ZSCAN1_3	AGACTCACCCAGCAAGCCAG	16	46	34	15	4	11	5	24
ZNF624	ZNF624_3	AGACTCCACTCTTTCCAGAG	81	69	19	31	6	13	9	6
ZHX1	ZHX1_5	AGACTCCAGTGATGAAACCA	147	63	29	42	11	20	8	7
ZNF317	ZNF317_7	AGACTCCATCTAAAACCAAG	88	71	86	87	11	20	14	31
ZNF14	ZNF14_5	AGACTCTGTGAAAGTAGAAG	117	48	43	35	14	32	3	5
KLF8	KLF8_5	AGACTGCACTACCACTGGGA	107	120	76	44	17	15	27	47
REST	REST_6	AGACTGCCCCATTACCTGGG	216	136	86	24	18	30	10	35
ZNF608	ZNF608_5	AGACTGCTGGAAATCGGCGG	119	103	150	74	13	27	30	24
ZNF827	ZNF827_7	AGACTGGGAGCTAAAAGGGG	38	7	5	2	0	7	5	1
ZNF688	ZNF688_3	AGACTGGGAGGAGCTCGGAG	122	45	31	20	15	19	13	17
TTF1	TTF1_4	AGACTGTTCATTCACCAGGG	241	123	191	93	25	81	51	90
ZNF284	ZNF284_5	AGACTTACTCACCTTGAACA	63	51	10	62	11	28	24	43
ZFP82	ZFP82_3	AGACTTCTCTCCAGAAGAGT	0	18	57	14	0	2	8	2
PHF19	PHF19 _5	AGACTTGATGTCCAAACTGA	129	41	14	11	15	11	10	16
THAP6	THAP6_1	AGACTTGATGTGAATGCAGC	48	20	25	42	10	14	6	20
ZNF549	ZNF549_6	AGAGAAACACATCAGAAAGG	62	46	73	31	5	6	14	13
FAM170A	FAM170A_6	AGAGAAACCAGAAGCAAAGG	28	51	7	14	1	6	7	5
ZFAT	ZFAT_2	AGAGAAGCACATGGAAGAAG	72	30	8	42	10	4	10	7
HMG20B	HMG20B_7	AGAGAAGCAGCAGTACATGA	121	45	18	32	8	11	16	17
REST	REST_5	AGAGAAGCAGGCAAAAGCCA	67	42	62	45	8	20	15	13
GLIS2	GLIS2_6	AGAGAAGCGGGAGAGGACGC	72	26	16	9	7	13	0	2
ZNF366	ZNF366_7	AGAGACACCTCACCACGCAC	228	209	168	126	20	30	56	76
ZNF415	ZNF415_2	AGAGACCAACGCGATAGAAG	49	64	70	55	10	25	33	26
NAIF1	NAIF1_2	AGAGACCACCTATCACACGC	113	53	35	62	19	43	9	28
ZGPAT	ZGPAT_7	AGAGACCGTTCCTAAAGCAG	62	37	67	17	9	12	11	8
ZNF496	ZNF496_4	AGAGACGCCGAGAGGACTCG	66	65	34	33	6	25	18	28
THAP10	THAP10_3	AGAGACGTCAAAACAGGCTG	63	60	62	47	7	19	11	25
ZNF343	ZNF343_5	AGAGACTGAGTCCAGAGCAG	236	127	97	73	9	53	69	22
MYNN	MYNN_1	AGAGAGACTGAACAAACAGC	12	13	8	15	1	2	2	2
HNF1B	HNF1B_4	AGAGAGAGAGGCCTTAGTGG	0	0	0	0	0	0	0	0
SAFB2	SAFB2_7	AGAGAGAGCGCCAGAGGCAG	0	14	8	6	0	0	0	0
ZNF135	ZNF135_3	AGAGAGCCTGGCAGTGCCGG	129	122	88	69	15	28	32	26
HOXD10	HOXD10_7	AGAGAGGAGCTGCCTGGCTG	98	63	22	45	15	33	25	22
FBXL19	FBXL19_4	AGAGAGGCACCTGAAGAAGG	62	19	14	32	2	8	7	1
FOXO3	FOXO3_1	AGAGAGGCGCATCATCGTCC	40	48	46	33	7	25	30	40
FOS	FOS_7	AGAGAGGCTATCCCCGGCCG	170	125	40	59	20	39	20	17
HESX1	HESX1_1	AGAGAGTTGAGTTGGTATAG	78	75	27	46	7	34	18	22
VEZF1	VEZF1_4	AGAGATAAGGGGAACCACCG	90	46	64	35	0	7	2	2
ZNF449	ZNF449_3	AGAGATAGAGACCTGGGTGA	28	14	18	11	0	0	7	12
ONECUT1	ONECUT1_1	AGAGATCAATACCAAAGAGG	28	9	35	11	1	13	6	9
ZNF500	ZNF500_5	AGAGATCCTGATTGTGAAGG	57	21	3	44	10	14	20	30
KLF16	KLF16_5	AGAGATGGCCATGAGCACGT	80	70	18	31	12	24	10	39
HNF4G	HNF4G_4	AGAGCAACAGGAAAACACTA	34	19	26	8	5	16	2	7
ZNF675	ZNF675_2	AGAGCAACCCTACAAATGTG	18	12	12	15	0	0	9	17
ZNF75A	ZNF75A_4	AGAGCAAGGGGAAGAGCCAT	23	29	10	28	5	9	8	8
NR2F2	NR2F2_5	AGAGCAAGTGGAGAAGCTCA	53	9	14	14	0	2	0	3
TGIF2LY	TGIF2LY_6	AGAGCACAAGAAGAAGCGCA	157	123	105	91	17	35	37	53
RBPJL	RBPJL_7	AGAGCACACCACCATTCTGA	49	47	88	76	5	8	10	19
MYOD1	MYOD1_3	AGAGCACTCGCACTTCCCCG	193	123	90	59	19	51	12	25
TERB1/CCDC79	TERB1/CCDC79_1	AGAGCACTGGAGGAAAGCAA	0	1	0	2	2	1	0	0
GATA1	GATA1_5	AGAGCAGGATCCACAAACTG	50	38	52	4	10	12	7	6
DUXA	DUXA_3	AGAGCAGGGCAAGATTCCTG	91	60	87	42	9	41	18	23
KAT7	KAT7_2	AGAGCCAAACGATACTCCGC	50	4	13	7	0	0	0	0
ZNF667	ZNF667_5	AGAGCCAGTAAGAAGACGCC	57	35	54	18	11	25	26	20
ZNF607	ZNF607_2	AGAGCCATGGATGATTGTGA	24	14	13	9	0	2	1	2
UNCX	UNCX_4	AGAGCCCGGGCTGCAAGCGG	170	65	72	40	14	22	28	10
ZNF546	ZNF546_2	AGAGCCCTGGATAGTAATGA	75	40	35	25	5	13	15	28
NFAT5	NFAT5_7	AGAGCCCTGTAACACAGCAA	156	59	85	53	15	23	17	43
FOXI1	FOXI1_2	AGAGCCGAGTAGGAATAGGG	42	6	14	15	1	1	2	3
FEZF1	FEZF1_6	AGAGCCTCGGCTGAAATCCG	124	140	100	98	34	47	56	66
OLIG1	OLIG1_1	AGAGCGAACTGGCCGCACGG	78	25	58	48	9	14	19	19
HOXC4	HOXC4_2	AGAGCGACTGTGATTTCTCG	107	33	44	45	5	25	18	18
ZNF671	ZNF671_4	AGAGCGAGGAGAAGAGCCCT	65	28	21	24	2	3	2	0
SETBP1	SETBP1_3	AGAGCGCATGGAGCCAGAGG	40	40	41	16	2	2	9	9
DPF3	DPF3_5	AGAGCGTCCACAGTCTGCGC	62	132	109	70	22	53	30	56
ZNF232	ZNF232_3	AGAGCTAGTGCAGACTAGGA	63	16	11	21	8	19	3	8
ZNF628	ZNF628_7	AGAGCTCAGGCACCACGGGC	76	42	68	15	9	21	4	10
FOXO6	FOXO6_1	AGAGCTCTCGGCGGAACGCG	114	66	60	69	0	26	16	22
ZNF785	ZNF785_6	AGAGCTCTGCAGCTTTCAGC	142	56	97	31	3	16	13	34
SP6	SP6_4	AGAGCTGCAGAGCCTCCCGC	92	30	84	27	1	2	5	2
BARHL1	BARHL1_6	AGAGCTGCCCGGGCTGCAGG	79	65	60	38	10	17	19	25
STAT4	STAT4_5	AGAGCTGTAGTGTTTACCGA	16	18	35	11	3	7	4	9
SP8	SP8_2	AGAGCTGTCCGAGAGGGAGG	0	4	5	3	1	0	0	1
SATB2	SATB2_1	AGAGCTGTGAGAATACCCCA	23	29	24	5	5	7	4	11
ZNF157	ZNF157_5	AGAGCTGTGGATATTAGAGG	119	17	23	32	6	9	10	21
MYSM1	MYSM1_2	AGAGCTGTTTGAACAAGGGC	9	53	54	38	12	18	14	11
NPAS4	NPAS4_4	AGAGCTTGAGGACATCGTAG	14	39	28	31	2	6	18	13
ZNF484	ZNF484_1	AGAGCTTGCTTATGATGCAG	40	56	19	19	5	8	3	16
VEZF1	VEZF1_1	AGAGCTTGTGTCGATTGAGA	94	46	43	48	6	17	4	1
ZNF569	ZNF569_3	AGAGGAAATGACTGAGTCCC	163	129	76	95	18	24	17	30
ZNF396	ZNF396_6	AGAGGAACCTATGAACAAGA	20	17	10	10	1	1	3	3
ZNF100	ZNF100_4	AGAGGACACATTCCATACCT	273	168	194	138	13	35	47	39
ZNF398	ZNF398_7	AGAGGACCAGGCAGGGCCAG	34	14	44	1	1	1	1	4
KLF11	KLF11_4	AGAGGACTGGAGAACATCCG	70	46	22	47	6	40	14	17
HKR1	HKR1_3	AGAGGAGAGAAAATGTCCAC	161	70	45	26	12	21	11	11
ZUFSP	ZUFSP_5	AGAGGAGCACAGTGAAGATA	63	53	21	36	3	19	17	19
SPIB	SPIB_3	AGAGGAGGAAGACTTACCGT	153	90	89	25	5	23	18	7
FOXP1	FOXP1_3	AGAGGAGGAGACACATGTCG	171	109	123	99	22	48	55	76
CSRNP1	CSRNP1_1	AGAGGAGGAGGAGGAGACCG	4	4	0	4	3	8	0	0
ZNF623	ZNF623_7	AGAGGATCCATACTGGGGAG	54	29	32	15	5	10	2	6
LEF1	LEF1_6	AGAGGATGGACCGCATGGGA	129	44	73	60	5	6	10	17
ZNF135	ZNF135_4	AGAGGCAGAGCTGTGGGCGG	33	43	19	9	2	0	1	9
MESP2	MESP2_4	AGAGGCGCAGACGCAGGCGG	48	34	18	33	5	9	3	2
NKX6-1	NKX6-1_3	AGAGGCGGACGAGGAAGAGG	0	0	4	4	0	0	0	0
ZNF397	ZNF397_4	AGAGGGAGTTTGATGACCCA	130	110	101	158	23	60	43	62
ZNF648	ZNF648_6	AGAGGGCACCGCTGACCCGG	36	49	26	5	0	9	4	18
IRF3	IRF3_2	AGAGGGCCCCAGGTTTGGGA	150	48	70	50	6	26	7	18
ISX	ISX_3	AGAGGGCCCCGGAGAAGCTG	41	46	24	20	3	6	4	13
AKAP8L	AKAP8L_1	AGAGGGCCTTGAAGGCACCG	70	31	37	39	5	14	12	27
ZNF197	ZNF197_4	AGAGGGCCTTGTGAAGGGGA	21	5	20	7	0	0	4	7
CAMTA2	CAMTA2_7	AGAGGGGCCAGACATATGGA	58	17	21	6	3	4	4	1
AC138696.1/ZFP41	AC138696.1/ZFP41_2	AGAGGGGCCATGGATGCTGG	45	47	23	37	4	7	13	20
DZIP1	DZIP1_6	AGAGGGGCCCGACGTCGCTG	239	158	176	112	22	49	117	116
KCNIP3	KCNIP3_4	AGAGGGGCTGGACCAGCTGC	228	100	64	60	17	46	11	10
PRDM1	PRDM1_7	AGAGGGGCTTGGAGTGGTGG	83	18	7	34	4	1	1	11
MSANTD1	MSANTD1_4	AGAGGGGTGGACTTAGCGGG	158	92	29	31	10	20	34	26
ZNF503	ZNF503_2	AGAGGGTCCTTACCTCGATG	98	23	34	68	5	15	16	21
ZNF316	ZNF316_3	AGAGGTAGTGCAGGATGCGC	171	131	174	133	23	41	29	54
ZNF384	ZNF384_6	AGAGGTCAGGGACAACCTGC	75	11	34	9	0	0	4	10
FOXQ1	FOXQ1_6	AGAGGTGCAAGCAGGAGGGG	45	17	9	12	0	1	1	3
CUX1	CUX1_1	AGAGGTGGCTCAGAGAGAGG	0	0	0	0	0	0	2	9
ZBTB7C	ZBTB7C_7	AGAGGTGTGGAAAGAAGTCC	27	28	7	20	2	5	9	16
LIN28A	LIN28A_6	AGAGTAAGCTGCACATGGAA	99	37	12	61	1	8	17	19
ASCL3	ASCL3_1	AGAGTAAGGGGATGACACCG	108	46	12	33	7	19	11	20
ELF3	ELF3_6	AGAGTACTGGGACTGTCTCG	62	52	38	44	11	33	9	20
ZNF263	ZNF263_3	AGAGTCACCGAGCTTCAAGC	192	64	24	52	16	22	23	34
ZNF215	ZNF215_4	AGAGTCATGTGTCTCCACGA	141	70	77	52	7	30	9	28
TCF7	TCF7_6	AGAGTCCAAGGCAGAGAAGG	33	24	32	6	4	4	1	1
POU3F4	POU3F4_6	AGAGTCCGCATGGACTAGGG	36	34	40	14	8	15	4	9
ZBTB24	ZBTB24_3	AGAGTCGATACAGCAAGCGG	36	29	25	29	7	21	5	3
MITF	MITF_3	AGAGTCTGAAGCAAGAGCAC	67	45	46	16	6	8	4	7
TBX22	TBX22_2	AGAGTGAAAGAAGGCCTCCA	33	63	10	19	7	12	8	11
ZFP82	ZFP82_4	AGAGTGGGAATACCTGGACT	182	45	59	74	10	16	18	27
TFAP2D	TFAP2D_6	AGAGTTCAGAGAGTAGGCGT	0	17	27	9	6	7	4	18
POU5F2	POU5F2_1	AGAGTTGCAGCAATTGGCCA	173	141	123	69	29	69	35	38
SON	SON_5	AGAGTTGCCAGAGCAGCCTG	56	26	24	9	3	8	4	9
ZNF365	ZNF365_1	AGAGTTGGCCCAGAAAACTG	21	29	9	15	0	4	6	3
SP7	SP7_1	AGAGTTGTTGAGTCCCGCAG	34	49	9	15	1	10	4	10
SCMH1	SCMH1_2	AGAGTTTCTCCAGGAAGCGG	49	19	19	12	7	3	7	5
TEAD1	TEAD1_2	AGATACATCAAACTCAGGAC	47	25	21	26	5	5	15	28
ZNF25	ZNF25_6	AGATACCAGGAAAGCCAAGC	99	63	29	29	11	25	12	11
TBX1	TBX1_7	AGATAGCGAGAAATATGCCG	71	36	86	42	5	10	8	23
ELF5	ELF5_4	AGATCAGTCCACGACATCAG	229	69	59	41	9	48	43	53
ZNF619	ZNF619_4	AGATCCCTGGACACTTGCTG	101	65	11	42	5	13	5	30
PGR	PGR_3	AGATCCTACAAACACGTCAG	136	80	79	60	11	30	23	30
ZNF160	ZNF160_5	AGATCCTCTGAGCAGGGTCC	9	22	3	23	3	5	5	7
TFAP4	TFAP4_2	AGATCGCCAACAGCAACGAG	70	35	89	36	7	12	16	11
ZIM2	ZIM2_1	AGATCGGGACTCATAAGCCC	260	186	131	70	20	35	23	58
CENPBD1	CENPBD1_2	AGATCTTGCTATCTCTACAG	60	32	6	13	1	5	1	4
SP140	SP140_1	AGATGAAGGAGCGGTCTCGG	153	81	73	34	12	46	21	24
HES4	HES4_1	AGATGACCGTGAGACACCTG	21	28	57	10	3	9	3	4
PA2G4	PA2G4_4	AGATGAGAAGAAGGCTCGGA	90	28	27	12	0	0	5	10
SOX15	SOX15_7	AGATGAGGAGGCAGCAGCCG	88	42	15	29	7	4	6	13
KLF12	KLF12_7	AGATGCTGTCATGGAAACTG	132	76	54	51	8	35	45	63
NR1D2	NR1D2_4	AGATGGAACAGAAGAGGAGG	0	5	10	3	0	0	2	2
ZNF497	ZNF497_3	AGATGGAGTCCCCAAGAGGG	49	26	24	34	4	11	20	23
SPIB	SPIB_1	AGATGGCGTCTTCTATGACC	74	25	0	21	4	2	2	4
ELF1	ELF1_2	AGATGGGATTCCTGAAGTGA	71	90	1	18	6	21	11	10
ZNF563	ZNF563_5	AGATGGGCCGAATAAATGCA	244	91	60	104	10	53	25	59
SMAD4	SMAD4_5	AGATGGGGCTAACAGAGCTG	81	23	48	23	3	8	3	10
ZZZ3	ZZZ3_7	AGATGGTTCAGGTTCTCCGG	61	25	77	24	4	8	15	20
PURB	PURB_3	AGATGTGAAGCAGAACGCCA	171	117	34	34	25	32	19	26
KIN	KIN_5	AGATGTGCCAGAAGCAGTGC	20	23	3	9	2	5	3	1
TEF	TEF_1	AGATTCGCCATCATATGGGA	65	41	23	34	12	16	20	35
ZNF528	ZNF528_3	AGCAAACGATCCAGACGGCA	177	102	75	56	17	21	30	57
EEA1	EEA1_5	AGCAACTCCTATAAACACAG	58	36	49	21	3	5	17	13
ZNF160	ZNF160_3	AGCAAGAAAACCAAGAACGC	53	56	4	20	12	20	10	6
ZNF609	ZNF609_7	AGCAAGAAGGAGAGAAGCGA	77	76	41	57	5	15	14	29
ATF6	ATF6_5	AGCAAGGACTGGCTGAGCAG	144	70	105	53	14	34	29	31
ZNF645	ZNF645_5	AGCACAGGATAACGACAGCG	88	78	28	26	15	38	11	18
RFX4	RFX4_6	AGCACAGGCAGCATGTGGGG	137	23	45	17	1	13	10	12
ZNF782	ZNF782_3	AGCACATGGGCCCTGTTGAG	167	92	45	19	3	10	8	8
ZIC2	ZIC2_1	AGCACATTCTGCGAGCCGTG	70	50	37	40	16	36	27	34
ZNF843	ZNF843_1	AGCACCGGCAGATTCACCCA	158	124	57	42	12	40	27	33
HES1	HES1_4	AGCACCTCCGGAACCTGCAG	252	97	92	95	18	29	11	41
ZNF396	ZNF396_7	AGCACCTTCAGAAATCACTG	51	84	18	39	8	18	23	19
IRX4	IRX4_6	AGCACGTGCTGCGAGTCCGG	61	86	25	65	3	32	11	9
ZNF446	ZNF446_2	AGCAGAACCCTCGGAAGCGG	27	60	44	30	5	16	8	12
CXXC5	CXXC5_7	AGCAGCACCAATGGCAGCGG	71	42	73	28	5	26	22	21
ZNF598	ZNF598_1	AGCAGCGGTAGCACACCGGG	140	74	32	20	12	17	9	30
ZNF212	ZNF212_4	AGCAGGCGCCGACTCCGCCA	190	90	42	45	25	38	22	39
DNMT1	DNMT1_2	AGCAGGCTTGCCAAGAGCGG	28	4	14	3	0	1	0	0
ZBTB25	ZBTB25_2	AGCAGGGACACCGAATGGCA	100	36	47	60	2	25	12	23
SMYD3	SMYD3_7	AGCAGTCCGAGACATCGAGG	27	28	39	44	4	3	7	25
ZNF717	ZNF717_1	AGCATCAAGGTATTCACACG	123	30	73	18	1	7	14	12
ZNF286A	ZNF286A_1	AGCATCACATCCCTTTGTGC	119	82	123	78	17	16	21	39
PBX4	PBX4_1	AGCATGCTCTGAATTGCCAT	85	59	30	11	8	11	7	18
ZSCAN30	ZSCAN30_5	AGCATGGTAGGCCAAGACTG	78	14	48	44	3	3	25	28
STAT5B	STAT5B_5	AGCATTGTCCCAGAGAACAG	70	35	27	38	7	22	13	16
CGGBP1	CGGBP1_3	AGCCAACATCCCACTTGAGA	92	45	12	38	5	21	28	29
RAX2	RAX2_6	AGCCAAGGTGCACCTACCTG	39	70	33	35	8	13	1	9
TAL2	TAL2_6	AGCCACACTAAGGAATGTGG	61	71	33	53	8	17	41	36
ZNF157	ZNF157_4	AGCCACATCCTCGAATGACA	92	91	53	33	9	38	10	15
ZNF853	ZNF853_7	AGCCACCGAGACCTTCGTGC	333	160	94	88	9	24	26	25
ZBTB39	ZBTB39_4	AGCCAGCACAAATGCAACAG	106	74	32	52	12	36	18	39
ZNF146	ZNF146_3	AGCCAGCAGAGAATTTACAG	154	75	93	54	6	20	17	31
NKX1-2	NKX1-2_5	AGCCAGGAAAAGTTTGGCGG	73	20	13	17	1	13	12	10
HES1	HES1_2	AGCCAGTGTCAACACGACAC	151	103	109	73	11	32	25	48
ZNF814	ZNF814_3	AGCCATCAACGAGTTCACGC	30	64	98	58	15	37	23	26
ZNF417	ZNF417_7	AGCCATCAGCGTGTTCACAC	87	89	36	40	11	34	19	15
ATF5	ATF5_1	AGCCATCCCAGCCCACTAGC	66	13	7	30	0	0	13	15
ZNF789	ZNF789_5	AGCCATGTTCCCACCAGCCA	114	83	80	38	1	28	7	22
ZNF229	ZNF229_3	AGCCATTTCCCAAGATAGGG	72	39	13	17	14	13	6	25
THYN1	THYN1_7	AGCCCAAACAGACAACATGC	260	111	73	101	12	25	29	33
ZNF610	ZNF610_7	AGCCCAGAAGAGGAAAGCAA	29	29	46	24	5	8	2	18
ZNF629	ZNF629_2	AGCCCCAACGATGCTCACAG	224	134	130	102	17	41	34	60
ZNF768	ZNF768_1	AGCCCCGAAGGGTACCTCAG	111	80	29	51	13	22	14	16
FOXF2	FOXF2_3	AGCCCGCGGGCATCATGTCG	320	153	135	107	34	90	53	74
ZNF790	ZNF790_7	AGCCCTCACTCACCTGGGCA	144	127	108	99	26	55	27	50
FOXD2	FOXD2_2	AGCCGAGGCAGACTTAGCCG	211	143	58	79	24	77	55	67
KAT7	KAT7_5	AGCCGCCGGCAATGCCGCGA	60	29	32	17	2	4	17	20
NANOG	NANOG_7	AGCCTACCTGTTTGTAGCTG	88	36	20	17	8	24	8	12
EVX2	EVX2_3	AGCCTGCATGGAGGCAGCGG	118	17	12	39	2	7	11	7
SCMH1	SCMH1_3	AGCCTGCTGCAACACCACAG	276	124	129	44	22	37	23	16
CREB3L2	CREB3L2_5	AGCCTGGATGAGAGGCGCCG	56	62	45	31	17	36	0	16
THAP11	THAP11_6	AGCCTGTAACTCCGACGCGG	210	51	84	51	10	15	8	13
ZKSCAN1	ZKSCAN1_5	AGCCTGTGGGGACAGACCCG	15	13	21	19	7	5	9	23
ZNF234	ZNF234_5	AGCCTTATTCACCTTGAATG	167	135	129	112	29	59	33	46
ZNF611	ZNF611_1	AGCCTTGAGACACATAAGAT	166	106	76	66	11	57	35	48
ZNF652	ZNF652_5	AGCGAGTGTTAAATACCCTG	60	33	24	28	3	2	4	10
ZSCAN2	ZSCAN2_4	AGCGCCGGCAGAGCTCTCGG	87	130	43	48	19	61	24	37
ZNF394	ZNF394_7	AGCGCCTGGACCCAGCACGG	66	39	46	27	6	17	9	8
FOXC1	FOXC1_1	AGCGCGATGTAGCTATAGGG	20	4	54	15	2	5	9	13
FOXF1	FOXF1_4	AGCGCGATGTAGGAATAGGG	52	61	49	32	7	26	21	11
TLX3	TLX3_3	AGCGCGCTTGGCAGAGGCGG	25	47	46	52	12	17	20	13
BHLHA9	BHLHA9_5	AGCGCGGATGGCCCATCCCG	16	56	77	16	8	17	14	2
FOXG1	FOXG1_1	AGCGCGTTGTAGCTGAACGG	143	60	50	25	7	6	6	9
ZNF549	ZNF549_1	AGCGCTAGTGATTACGCCGC	132	114	84	60	21	38	21	52
USF2	USF2_1	AGCGGAGGAGCAGACAGCGG	0	4	26	1	0	0	0	0
CSRNP2	CSRNP2_3	AGCGGCAGAAGCAGCTGCGG	52	36	43	19	5	14	8	7
ZNF304	ZNF304_7	AGCGGCGGTGCTGATGGACC	169	147	124	62	22	53	20	43
SNAI2	SNAI2_3	AGCGGTAGTCCACACAGTGA	104	41	24	49	15	27	18	37
TLX3	TLX3_5	AGCGGTCTTTCACGAAGCGG	218	115	56	66	16	26	22	22
ZKSCAN8	ZKSCAN8_5	AGCGTAACTGCCTGAAGCGC	96	30	0	8	2	5	14	6
DLX2	DLX2_6	AGCGTAGGAGGTGTAGGCGG	18	29	20	14	0	14	4	11
SOX21	SOX21_1	AGCGTCTTGGGCTTGCGCCG	252	179	91	52	18	42	32	45
FOXN1	FOXN1_2	AGCGTGACGTCAGACTGCGG	72	46	35	26	10	32	6	17
DBP	DBP_5	AGCGTGCGCTCCCACAGCAG	175	96	106	60	21	45	29	22
FOXJ1	FOXJ1_1	AGCGTGGCATACGAGTAGGG	22	31	77	26	11	28	11	7
ZNF48	ZNF48_7	AGCGTGGTTCACCCAGGAGC	68	45	57	35	5	12	6	15
LBX1	LBX1_6	AGCGTTCTGCAGGCAGCCGA	60	32	19	31	4	27	9	5
ZNF730	ZNF730_2	AGCGTTGACATTTAGAGATG	109	66	54	101	19	28	24	24
ZNF3	ZNF3_5	AGCGTTTGGAACCTGCTCAG	31	29	36	41	3	7	18	28
HES5	HES5_2	AGCTACCTGAAGCACAGCAA	70	44	53	48	16	67	18	17
ZNF169	ZNF169_1	AGCTATTGAGTTCTGCTCAG	251	97	120	130	26	40	26	50
ZNF804A	ZNF804A_7	AGCTCCACGCATCTCAGCAA	172	67	42	48	10	15	10	17
DLX5	DLX5_7	AGCTCCTACCACCAGTACGG	80	59	92	66	9	19	20	14
ZSCAN18	ZSCAN18_6	AGCTCGCCTGGTAGCAGCAG	113	84	198	56	12	38	27	31
ZNF225	ZNF225_5	AGCTCTACTCACCTTCAACG	108	28	55	14	6	19	22	13
ZNF230	ZNF230_7	AGCTCTACTCACCTTGAATG	127	121	75	65	19	22	14	23
STAT4	STAT4_7	AGCTGCAAGACTGGAAGCGG	31	25	76	37	7	14	19	17
ZNF229	ZNF229_4	AGCTGCTGGACTCTACCCAG	35	21	25	8	0	3	2	7
CENPX/STRA13	CENPX/STRA13_5	AGCTGGATCCGGCTTCCGGA	203	53	48	61	16	44	6	9
GMEB1	GMEB1_2	AGCTGGGTCGGAGAACAACA	48	20	7	38	11	25	20	14
MECP2	MECP2_6	AGCTTCCGGCACAGCCGGGG	130	82	45	54	7	20	7	21
NR5A2	NR5A2_6	AGCTTGGATCACCTGAGACA	74	60	53	33	3	23	4	6
SMYD3	SMYD3_4	AGCTTGGCCAGACCACAAGC	26	56	0	3	7	12	4	5
ZEB2	ZEB2_5	AGCTTGGCTCACGTGTGGGG	71	62	86	33	6	22	2	21
STAT5B	STAT5B_6	AGCTTGTATCCACACAGCCA	50	80	95	74	12	39	27	31
DLX5	DLX5_5	AGCTTTGCCATAGGAAGCCG	56	63	29	27	3	22	7	12
TET1	TET1_7	AGGAAAACAAGAGGCCCCAG	27	34	15	11	7	10	13	20
ESR1	ESR1_4	AGGAAAGGCGACAGCTGCGG	93	68	33	39	19	48	9	8
INSM2	INSM2_4	AGGAAAGGGGTTGACGGCGG	28	47	35	63	6	10	12	21
ZNF205	ZNF205_6	AGGAAATGCCTTCTAAGCTG	58	45	21	28	6	8	15	8
CPXCR1	CPXCR1_7	AGGAACAACATCTTCCTGGG	12	5	8	16	1	1	4	10
ZNF491	ZNF491_2	AGGAACATCAGAACTGACAC	19	33	47	31	6	10	11	17
CEBPG	CEBPG_2	AGGAACCTGCTGTAAGCCGC	145	46	61	53	7	29	14	35
POGK	POGK_6	AGGAAGAAGAGATTCAGAGC	93	83	98	82	15	46	20	21
ZNF32	ZNF32_7	AGGAAGAGTTTCCACACCAG	42	9	53	34	3	8	3	18
ZNF816	ZNF816_6	AGGAAGATTCATACTGGAGA	89	67	19	35	6	4	8	18
ZNF266	ZNF266_5	AGGAAGCCACAACGGAGGGG	141	32	104	49	8	20	13	28
SMYD3	SMYD3_6	AGGAAGCCATCCCGTCAGAG	131	85	123	34	10	29	21	19
ZSCAN16	ZSCAN16_6	AGGAAGCTGGGAAACCACAA	140	50	38	16	7	31	14	4
HOXB5	HOXB5_6	AGGAAGCTTCACATCAGCCA	69	54	10	26	13	13	11	14
ZUFSP	ZUFSP_7	AGGAAGGTTTTGATCCTCAG	33	40	15	17	2	8	10	8
ZNF365	ZNF365_7	AGGAAGTTCAGAGACGAGAG	158	54	54	57	20	56	29	37
ZNF439	ZNF439_3	AGGAATATGGACCAAAGCCA	27	40	48	32	9	31	21	14
ZNF701	ZNF701_4	AGGACAAGGCAATACAGAAG	83	94	58	67	8	33	17	10
ZNF148	ZNF148_3	AGGACAATGGTTGTAATGGG	81	49	25	27	14	36	4	13
ZNF668	ZNF668_2	AGGACACGCACTTGTAGCGG	93	48	64	76	4	10	33	87
BATF2	BATF2_1	AGGACCCCAAGGAGCAACAA	66	45	43	23	10	13	8	4
TERF1	TERF1_7	AGGACCCGCAACAGCGCAGA	162	168	221	142	22	58	52	73
PITX2	PITX2_6	AGGACCCGTCTAAGAAGAAG	54	33	7	19	1	8	12	21
ZXDB	ZXDB_2	AGGACCGATCAACCTAGCGG	57	68	46	32	8	9	19	20
ATF5	ATF5_3	AGGACCTCATAGGGAGCCAG	23	22	16	19	5	15	5	19
FOXI3	FOXI3_2	AGGACCTGATGAAGATGGTG	21	50	52	50	10	23	17	27
NEUROG1	NEUROG1_4	AGGACGACGAGCAGGAGAGG	26	53	21	11	27	38	8	13
SP8	SP8_1	AGGACGAGGAGCGTTTCCAG	102	49	99	73	6	14	18	22
NKX2-8	NKX2-8_1	AGGACGCGCAACACCTGCCG	69	32	33	46	10	45	23	60
HES6	HES6_3	AGGACGGCTGGGAGACGCGA	60	32	74	24	2	10	15	14
ZNF169	ZNF169_2	AGGACTCCTGACAACCAGGA	151	72	113	35	13	24	29	45
KLF9	KLF9_2	AGGACTCGACCCAGATTCGG	159	63	160	84	12	35	46	44
MEIS3	MEIS3_3	AGGACTTGGACCAGGAGCGA	58	35	37	30	2	8	15	14
ZNF616	ZNF616_4	AGGAGAAAGGTTCCAAACAG	82	27	24	37	5	9	14	26
CBX2	CBX2_5	AGGAGAACATCCTGGACCCG	75	74	52	57	5	26	7	10
ZNF432	ZNF432_6	AGGAGAAGAACCATGGACAA	89	32	45	42	9	14	40	47
ZNF354C	ZNF354C_5	AGGAGAAGATCCCTGCATGG	49	50	41	25	8	16	14	12
FOSL2	FOSL2_1	AGGAGAAGCGTCGCATCCGG	11	5	0	0	9	9	0	0
ZNF688	ZNF688_1	AGGAGATGTCCCAAACAGGA	71	15	12	13	8	15	7	13
LMX1B	LMX1B_5	AGGAGCAGCAGAACTCCCAG	169	85	81	60	12	31	34	52
MEIS2	MEIS2_5	AGGAGCAGCATATAGTCCAG	78	25	0	44	12	20	5	6
ZBTB32	ZBTB32_7	AGGAGCCAGAGAAACCCTCA	99	39	80	40	2	9	20	17
ZNF292	ZNF292_7	AGGAGCTGGAGCTACAGCTG	18	1	9	16	1	0	1	2
POU1F1	POU1F1_4	AGGAGGAAATCCATGACTCA	125	54	49	46	12	17	26	20
SNAPC5	SNAPC5_7	AGGAGGAGGAGACGCTGCTG	110	10	55	11	0	1	1	0
HOXC11	HOXC11_7	AGGAGGAGTAGCTGTTCCGA	69	32	66	36	5	14	24	41
ZNF552	ZNF552_3	AGGAGGCGTTGTTTGCGAAG	145	47	39	19	7	23	8	20
ZNF587B	ZNF587B_7	AGGAGGCGTTGTTTGTGAAG	107	52	64	27	11	17	8	11
ZBTB32	ZBTB32_4	AGGAGGTCTGGCGGGAACAG	26	62	31	58	16	24	19	39
DRGX	DRGX_1	AGGAGGTGTCACCTCTGCCA	169	30	54	54	6	20	5	16
ZNF296	ZNF296_4	AGGAGGTGTCCTCGGCGGGG	4	13	28	18	0	1	0	0
ZNF581	ZNF581_5	AGGAGTCACAGAGGGAGCCA	28	35	9	42	0	1	7	29
MLX	MLX_1	AGGAGTCCTACAAAGACCGG	95	25	0	1	2	5	8	10
SCML4	SCML4_4	AGGATCCCGGGGAGAAAGCG	48	31	2	24	7	5	6	12
ETV3L	ETV3L_5	AGGATCCTGCATAAGACCAA	42	66	83	45	9	13	21	26
ZNF575	ZNF575_5	AGGATCGGTAGCCCCGGCCG	50	76	45	37	11	36	29	54
ZNF385B	ZNF385B_5	AGGATCTAAACACAAGACCA	132	114	73	50	18	38	42	71
BHLHE41	BHLHE41_2	AGGATGAAGCTGGATTCCCG	227	90	90	77	24	42	33	43
HMGA2	HMGA2_4	AGGATGAGCGCACGCGGTGA	359	168	53	94	35	109	30	41
GPBP1	GPBP1_7	AGGATGCTGGTCATTAAGAA	45	60	22	29	2	11	6	12
HIF1A	HIF1A_3	AGGATGCTTGCCAAAAGAGG	108	70	87	58	14	24	49	27
ZFP3	ZFP3_7	AGGATGTGAAGAAGACATGT	232	74	136	69	15	17	32	26
IRF8	IRF8_3	AGGATGTGTGACCGGAATGG	48	53	17	19	3	28	21	11
ZNF709	ZNF709_7	AGGATTTGGAGTCTGACTGA	137	139	77	55	27	49	44	45
ZNF582	ZNF582_4	AGGCAAAGAGCCCTGGATGG	156	42	56	25	4	13	8	12
IRF9	IRF9_2	AGGCAAGCAGGACTTCCGGG	74	62	36	58	6	15	11	12
SOX5	SOX5_7	AGGCAATCATGCGCAACAGG	202	99	107	69	13	37	49	64
ZNF432	ZNF432_1	AGGCACAGTCGAATCTGTCC	117	139	116	118	8	26	19	29
ZNF627	ZNF627_5	AGGCACATCAGAGATCACAC	29	34	35	14	1	6	2	6
ZNF433	ZNF433_2	AGGCACATCAGAGATGACAC	61	19	45	28	7	8	6	24
IKZF4	IKZF4_1	AGGCACCACACTGGTTGCAA	79	78	47	45	13	25	15	16
ZNF625	ZNF625_5	AGGCACCACAGAGCTGACAC	115	74	43	46	13	26	9	9
NRL	NRL_1	AGGCACTGAGCTGTAAGGTG	63	30	45	63	7	12	12	13
CTCFL	CTCFL_6	AGGCAGAGGTGACACAGGTG	27	22	28	22	1	5	9	8
VENTX	VENTX_1	AGGCAGATTTGAGGACCCGG	31	18	12	23	1	10	4	7
ZBTB7C	ZBTB7C_4	AGGCAGCCAGGACGGAGCGG	8	17	24	21	0	10	5	8
JAZF1	JAZF1_6	AGGCAGCGAGTATGACGAGG	157	72	88	51	9	23	31	41
RARB	RARB_5	AGGCAGGAGCTGGTTGGCAA	46	30	45	44	2	13	26	23
NEUROG1	NEUROG1_6	AGGCAGGGGACGCACTGCGG	132	25	51	24	4	9	19	42
ZNF148	ZNF148_5	AGGCATAAGAGAACTCATAG	94	49	46	69	6	11	12	12
AEBP2	AEBP2_6	AGGCATATGCTGACACACAG	122	70	34	57	10	9	10	14
E2F2	E2F2_4	AGGCCAAGAACAACATCCAG	64	20	34	13	10	26	0	5
ZNF428	ZNF428_4	AGGCCACCTTACCTGGGGAA	71	33	19	16	12	17	11	7
CUX1	CUX1_5	AGGCCAGCCTCACCAAGCTG	114	130	86	92	12	19	35	86
ZXDA	ZXDA_3	AGGCCCCATCAACCTAGCGG	79	15	16	10	2	8	4	8
IKZF1	IKZF1_7	AGGCCCCGCACTGATTGCAC	253	39	59	7	1	9	0	0
FOXI2	FOXI2_5	AGGCCCGGGACCCGAAGCGT	44	29	6	10	1	6	12	18
LHX2	LHX2_5	AGGCCGCCAGATCCGCACCG	116	99	71	57	10	18	25	17
ZNF318	ZNF318_3	AGGCCGGTGGGAAGAGACGG	24	8	18	1	0	12	0	0
ZSCAN21	ZSCAN21_5	AGGCCTAGGGCCCAGAACTG	14	8	36	1	0	0	0	0
NR2E3	NR2E3_3	AGGCCTGGCACTGGTTGCGG	73	27	74	48	7	30	29	21
GLIS3	GLIS3_4	AGGCCTGGTCAACCACATGG	175	77	94	74	8	20	17	30
ZNF264	ZNF264_3	AGGCCTTACCCAGAGACACC	91	80	28	18	8	16	2	11
FERD3L	FERD3L_6	AGGCCTTTGACCAGCTGCGG	122	120	108	86	18	38	34	36
ZNF169	ZNF169_7	AGGCGACGAACCTTGGAGAG	76	59	41	51	10	8	13	21
KCMF1	KCMF1_2	AGGCGATCCTAATCATGTCA	60	17	8	24	4	6	18	11
ZNF346	ZNF346_1	AGGCGCAGCAAACCTTACAC	68	70	0	17	13	15	2	12
TFEB	TFEB_6	AGGCGCAGCAGGAGGAGCAG	0	2	0	1	0	1	0	6
KLF13	KLF13_7	AGGCGCTGTCCTTACCGTCG	111	47	51	23	11	39	10	24
ZNF165	ZNF165_2	AGGCGGCTCAGTGCCTCGCG	162	122	106	63	8	35	28	36
ZNF79	ZNF79_2	AGGCGGGACTCAAATGCTGG	0	28	48	20	5	13	4	18
ETV3	ETV3_3	AGGCGGGTGAAAATGAAAGC	24	30	18	17	13	11	6	2
ZNF503	ZNF503_7	AGGCGGTTGGCCTGGCGCAG	73	52	5	22	4	17	9	14
OVOL1	OVOL1_5	AGGCTCATGTTCAAAGCCAG	44	44	10	12	5	4	1	6
DUX4	DUX4_1	AGGCTCGCAGGGCCTCGCTT	10	8	3	0	1	2	0	0
ZNF709	ZNF709_6	AGGCTCTGTGAAAGGAAAGA	21	47	20	31	5	14	12	3
ZNF175	ZNF175_6	AGGCTGAAGTCTCACATCAG	158	86	74	82	8	40	38	30
TCF4	TCF4_4	AGGCTGATTCATCCCACTGG	34	38	32	7	9	12	12	11
DLX6	DLX6_1	AGGCTGGAATAAATGGTCCG	125	65	126	24	15	16	18	29
FOXJ3	FOXJ3_1	AGGCTGGCATAACTGTATGG	35	39	47	68	8	8	12	13
TBX20	TBX20_6	AGGCTGGTCAGCTCACCCAG	124	82	80	72	15	31	9	21
AR	AR_4	AGGCTTCCGCAACTTACACG	77	53	32	57	11	24	28	33
ZNF133	ZNF133_3	AGGGAAAGAGACCTGGAGAG	8	6	15	9	6	8	1	3
PHF20	PHF20_4	AGGGAACCCAAAAGAAAACG	27	33	35	8	4	4	2	2
RBAK	RBAK_1	AGGGAACCCTCACTGTACAT	146	82	43	52	11	20	2	17
HMGN3	HMGN3_6	AGGGAAGAAGGAGGAAAAGC	45	39	35	14	6	7	10	6
FOXE3	FOXE3_1	AGGGAAGCCAGAGAACGCGG	69	32	54	31	3	3	22	16
ARNTL2	ARNTL2_5	AGGGACAAGACCAACAGCTA	223	103	78	105	23	42	61	42
ZNF710	ZNF710_4	AGGGACACAGACGGACGCCG	83	50	56	22	10	18	27	20
SOX3	SOX3_3	AGGGACACCCACACAAGCGG	124	66	70	40	16	21	17	19
ZNF805	ZNF805_2	AGGGAGAACGCTTGAGACCA	108	54	29	39	12	24	16	23
NFIL3	NFIL3_5	AGGGAGCCAAGAGATGACCG	99	23	23	24	0	11	16	17
JDP2	JDP2_5	AGGGAGCCTGTGGTCACCGA	164	43	85	95	11	18	41	51
AHCTF1	AHCTF1_6	AGGGAGGAAGGCGTGAATGA	0	0	0	0	0	0	0	0
MYBL1	MYBL1_1	AGGGATGGCTCATTGAACGA	64	65	26	32	9	8	11	22
ZNF420	ZNF420_5	AGGGATTATTTGGAAGCCAA	20	28	25	18	3	6	18	10
ETV3	ETV3_5	AGGGATTGGAGAGACAGCGA	0	12	14	7	2	3	1	3
RUNX3	RUNX3_5	AGGGCACCGGCAGAAGCTGG	44	4	13	32	1	3	7	7
BAZ2A	BAZ2A_2	AGGGCAGCCACCGATGGCAG	195	89	54	65	13	21	8	19
CENPA	CENPA_7	AGGGCAGCTTCCTTATCAAG	170	89	139	25	6	16	7	11
FOXD4L1	FOXD4L1_2	AGGGCAGGGGCCCCAAGCAG	0	14	0	9	5	4	2	4
ETV3L	ETV3L_7	AGGGCCACCAGAGACCTCTG	18	17	0	15	1	10	0	19
TCF23	TCF23_2	AGGGCCACCAGCCATGCCAG	47	36	34	29	3	4	15	9
SNAPC2	SNAPC2_4	AGGGCCACTGGAAGAAGCCC	53	4	21	2	0	7	7	1
ZBTB17	ZBTB17_6	AGGGCCAGCTGAGGTCAAGG	58	36	84	17	0	19	5	17
CCDC17	CCDC17_5	AGGGCCCCGCGAACACCCTG	98	48	9	36	10	26	14	10
ZNF574	ZNF574_2	AGGGCCCGGAGGAACAACAG	18	23	20	15	0	2	1	1
GZF1	GZF1_5	AGGGCCGGAGGAGGAAGAGG	0	4	5	0	1	0	0	0
KDM5B	KDM5B_2	AGGGCCTCTCCAGTGAGCGG	69	38	34	66	1	3	18	37
NCOA3	NCOA3_4	AGGGCCTGGTGAAATCCCCA	25	27	10	29	0	0	7	14
NFXL1	NFXL1_3	AGGGCGAGAGAAGGGGTCGG	11	39	32	23	5	12	7	15
MYC	MYC_4	AGGGCGAGCAGAGCCCGGAG	9	10	76	9	0	0	2	4
TCF3	TCF3_3	AGGGCGAGCAGGTGCCACGG	95	48	16	40	6	19	21	17
ZNF408	ZNF408_2	AGGGCGAGGGAGTAAAGCCA	21	27	19	9	9	12	6	5
SOX17	SOX17_1	AGGGCGAGTCCCGTATCCGG	40	38	81	35	5	11	8	21
ATOH8	ATOH8_5	AGGGCGCACAGTGGACTCCG	128	63	12	55	16	41	19	21
ASCL4	ASCL4_6	AGGGCGGAATGCAACAGCGA	37	90	30	52	9	8	27	30
FOXI1	FOXI1_5	AGGGCGTGCCCAGCCCTCAG	142	69	33	46	22	33	26	37
ZNF512	ZNF512_5	AGGGCTCCCTACCTTCAGCC	150	51	3	21	12	45	6	10
LCORL	LCORL_1	AGGGCTCCGGCACTGAGCGG	138	129	113	52	21	35	18	28
KLF14	KLF14_7	AGGGCTCCTGGGAGAACTCG	50	56	38	18	9	7	2	7
EVX2	EVX2_2	AGGGCTGCACAGCCCTACGG	148	72	42	18	17	19	7	5
TBR1	TBR1_3	AGGGCTGCCGATGGAGAAGG	62	28	43	17	9	10	14	10
HNF1B	HNF1B_2	AGGGCTGCTAAAATGATCAA	12	54	24	24	0	11	22	45
IRF5	IRF5_2	AGGGCTTCAGCCGCACGCGG	53	94	67	45	11	18	12	17
SON	SON_3	AGGGCTTCCAGCACCATCCA	37	34	31	37	3	7	5	0
PPARG	PPARG_2	AGGGCTTGATATCAAAGGAG	90	42	26	27	4	19	14	26
ZBTB9	ZBTB9_3	AGGGCTTTCAGTAGAAGCAG	30	41	54	38	12	23	24	31
KLF10	KLF10_3	AGGGGAAAACCCAGGAGCAG	165	65	11	47	8	18	6	7
TLX3	TLX3_1	AGGGGAAATTGAGACCGCCA	27	29	32	17	6	5	9	5
TP73	TP73_3	AGGGGAACTCACCGTCCAGG	36	58	44	52	9	32	18	16
ZNF79	ZNF79_6	AGGGGATACCAGGAAAGTCC	89	28	19	54	4	16	27	17
RAX2	RAX2_5	AGGGGCCGGCAACCGAGGGT	26	22	39	19	0	9	0	6
NR1I2	NR1I2_1	AGGGGCTGACAGAGGAGCAG	22	20	30	12	2	2	1	4
KIN	KIN_3	AGGGGCTGCAGAAGCTACGC	32	8	0	7	3	6	0	0
MTF2	MTF2_5	AGGGGTGGTGCACTTAAGAA	42	29	54	25	1	0	24	44
KLF17	KLF17_5	AGGGTAGCCAGGCCCTTCGG	116	36	31	8	6	19	5	16
MYC	MYC_2	AGGGTAGGGGAAGACCACCG	0	0	9	4	0	0	0	3
DLX6	DLX6_2	AGGGTAGTGCGCGCCTGCCA	272	164	135	120	33	73	57	77
FOSL2	FOSL2_7	AGGGTATGGGTTGGACATGG	93	54	16	44	10	26	10	0
MECOM	MECOM_5	AGGGTCCATAAAGAAAGGAG	43	48	38	79	5	0	8	25
ASCL4	ASCL4_3	AGGGTCCCCGGAACGCCCAG	120	38	33	41	6	9	30	39
IKZF4	IKZF4_3	AGGGTCTCACCGGCAAGGGA	124	61	96	81	4	18	15	39
TPRX1	TPRX1_1	AGGGTCTCAGCCCCAAGAGG	94	32	9	2	4	2	4	5
KLF8	KLF8_4	AGGGTCTGGGGAGAAGACTG	0	0	0	0	0	0	0	0
ZNF157	ZNF157_3	AGGGTGAACATGCCAGCTAA	84	57	107	33	9	22	5	23
ZFP69	ZFP69_5	AGGGTGATCAGGAGCTGCTG	35	35	121	28	4	13	17	20
ZKSCAN7	ZKSCAN7_4	AGGGTGATGCAGCTGCACCC	41	7	5	27	0	13	2	13
JDP2	JDP2_2	AGGGTGCAATCATGGCCCCG	290	101	63	69	24	38	23	44
MYCL	MYCL_5	AGGGTGCACCGGAGACGAAG	102	46	21	50	11	32	24	18
MLXIPL	MLXIPL_2	AGGGTGCTGGATACAAGTGG	40	23	45	16	2	11	3	9
LYL1	LYL1_3	AGGGTGGAGAGTTGCAGCAG	95	32	14	19	5	6	3	12
ZSCAN20	ZSCAN20_2	AGGGTGGCGTGCCTGCACCC	41	26	35	40	9	12	20	44
ZNF76	ZNF76_4	AGGGTGGTGAATGTAGGCAG	164	50	47	22	12	7	25	41
CPXCR1	CPXCR1_2	AGGGTGTCAGAATACCATGT	76	42	47	19	5	18	7	19
RAG1	RAG1_6	AGGGTTCATGGTAAACCCAG	62	17	24	27	8	14	18	33
MYRFL	MYRFL_3	AGGGTTGGGTAGCATGCACC	244	169	103	102	21	49	28	45
ZNF202	ZNF202_1	AGGGTTTGCAGAAACAACCC	96	51	35	33	5	20	14	29
CARF	CARF_5	AGGGTTTGCAGTTACAACCA	130	69	76	86	16	33	28	62
ZNF33B	ZNF33B_3	AGGTAGATCAGAAGTTCCAG	40	18	32	11	17	2	8	1
DACH2	DACH2_1	AGGTATAACAGCTGCAGCGA	147	84	67	43	9	27	7	11
ZNF768	ZNF768_6	AGGTATGAACCCCAAAGCCC	58	64	51	26	11	14	5	15
KLF5	KLF5_5	AGGTCCTCTGGAGGCAGCCG	156	93	106	60	14	25	15	16
RARA	RARA_7	AGGTCTACGTGCGGAAGCGG	63	59	49	49	9	8	9	12
PHF21A	PHF21A_2	AGGTCTCTGGCCCACCACAG	55	52	60	58	5	10	19	32
ZNF665	ZNF665_7	AGGTCTTCAGTCAAAACTCA	101	100	81	38	19	32	19	19
FOXL1	FOXL1_5	AGGTGCCCCGCGAGAAAGGG	14	30	55	5	8	6	7	4
ZNF273	ZNF273_5	AGGTGGACCTCTAGGAGCAG	18	12	3	12	4	8	7	14
ZFP64	ZFP64_7	AGGTGGCACAACGGTGCTGG	140	64	39	51	4	24	3	3
NEUROG3	NEUROG3_2	AGGTGGGCAGGACACCGCGC	48	29	54	26	3	4	15	23
E4F1	E4F1_2	AGGTGGTGGGCACATCAAAG	153	78	106	54	7	12	6	4
NR2F6	NR2F6_5	AGGTGTAGCTGAGGTTGCGG	0	0	0	0	0	0	0	0
SOHLH1	SOHLH1_3	AGGTGTGCCAGACCCTGGGA	148	108	76	47	23	37	17	43
CHAMP1	CHAMP1_3	AGGTTCAGGAGAAGAAACAG	18	11	10	5	2	5	6	2
ZFPM1	ZFPM1_7	AGGTTCCCTCGGAGACATGG	49	49	15	32	5	5	17	19
SIM1	SIM1_1	AGGTTCCTGGCGAAACACGG	112	39	52	68	9	19	14	35
GLYR1	GLYR1_5	AGGTTGAGACGACTTCAGCG	121	68	46	60	19	37	11	11
ZNF687	ZNF687_1	AGGTTGCACCATCACCACCG	58	130	102	70	12	22	37	24
OSR1	OSR1_4	AGGTTGGCAAAATCAAAGCG	87	23	27	22	9	19	28	25
LHX6	LHX6_1	AGGTTGGGTACCGTTCTCGG	132	122	137	73	11	27	27	33
ZNF547	ZNF547_6	AGGTTGTTGCCATGGAGCTG	199	106	134	69	14	36	43	61
ZNF134	ZNF134_6	AGGTTGTTGGCATGAAGTGA	52	39	21	50	4	6	22	14
ZNF772	ZNF772_1	AGGTTGTTGGCATGGAATGG	68	50	39	47	1	13	28	42
ZNF419	ZNF419_5	AGGTTGTTGGCATGGAGCCG	49	44	26	31	7	31	24	23
SNAPC4	SNAPC4_3	AGGTTTCTGGGTCTTCAGGG	104	53	39	14	5	12	13	3
TRPS1	TRPS1_5	AGGTTTTGCAACCTCAGAGG	120	54	32	28	11	9	13	39
ZNF408	ZNF408_5	AGTAAAGCCACGGCAGGAGG	25	24	39	11	15	11	6	11
CAMTA2	CAMTA2_2	AGTAAGCCCAGACTTCCCCG	177	91	36	51	14	40	13	34
NCOA1	NCOA1_6	AGTAATTCTAGCAACAGCCA	169	199	90	114	27	44	26	43
TGIF2LX	TGIF2LX_5	AGTACAAAGGGCTGCCGAGC	28	28	55	54	15	20	13	12
ZNF800	ZNF800_3	AGTACCGGTTACAGATACAG	87	79	11	23	14	30	12	21
ZNF182	ZNF182_4	AGTACCTGAACCCACCACAG	67	38	77	54	7	11	17	43
POU1F1	POU1F1_2	AGTACCTGTAGACATCACAT	259	136	93	112	45	77	57	104
ZNF493	ZNF493_1	AGTACGGTAGTCAAACCCCC	157	112	71	75	10	43	12	39
GSX1	GSX1_1	AGTACTGCGAGCCGAAGGGT	0	29	7	17	11	16	9	8
NR2F6	NR2F6_7	AGTACTGGCACTGGTTCCGG	46	57	13	63	23	35	27	41
ZNF157	ZNF157_1	AGTACTTACCTGAGTAACCA	83	85	49	31	8	36	12	10
POU4F2	POU4F2_7	AGTACTTGGGCTCCACGTGC	143	117	66	58	17	44	21	35
TOPORS	TOPORS_6	AGTAGAAACAAGGACAGGGA	170	68	93	49	1	12	19	12
CEBPZ	CEBPZ_4	AGTAGAAGATCCGGACGAGG	66	37	11	24	2	2	13	20
MYSM1	MYSM1_4	AGTAGACATCACAGATGAGG	127	76	36	50	10	32	5	9
NACC2	NACC2_5	AGTAGAGCTTGGGATGGCAG	46	14	33	9	1	4	1	3
ZNF442	ZNF442_5	AGTAGCCTTTGAGGATGTGG	118	46	31	75	11	18	39	46
ZNF579	ZNF579_4	AGTAGGGGAAACGGAAGAGG	60	3	15	1	1	5	2	10
FOXD4L1	FOXD4L1_4	AGTAGGTGCCCTTGCCTGGG	61	8	14	5	0	0	7	2
ZNF471	ZNF471_2	AGTAGTAAAAGTCATGCCCC	130	50	28	51	11	13	14	31
NRF1	NRF1_1	AGTAGTATATTCATCTAACG	0	6	21	37	7	13	3	18
ZNF250	ZNF250_6	AGTAGTCACTCCACAGGCCC	132	43	128	79	10	9	23	23
CEBPG	CEBPG_1	AGTATCGGCAACGCCGAGAG	92	42	22	53	4	8	15	23
ZNF160	ZNF160_7	AGTATGGATTGCCTGATGGG	156	145	89	55	13	35	17	13
NCOA3	NCOA3_1	AGTATTGCCAGAAGATGCCA	127	51	56	18	3	15	6	3
NR2F1	NR2F1_2	AGTATTGGCACTGGTTGCGG	118	42	60	18	7	6	17	14
CGGBP1	CGGBP1_4	AGTCAAAGACTCATACCAAG	220	119	85	49	11	33	14	27
ZNF639	ZNF639_3	AGTCAACCAGCAAACCCAAG	320	100	115	47	10	32	37	40
ZNF302	ZNF302_6	AGTCAATCCTCAGTCGCCAC	118	77	38	54	8	24	12	27
MBD1	MBD1_7	AGTCACAGCCTCCCTTGCGG	206	102	56	77	19	67	38	110
ZNF84	ZNF84_1	AGTCACATCTCATATCGCAT	54	67	37	21	6	6	13	16
THRB	THRB_1	AGTCACGCGAAATCAGTGCC	56	57	69	25	12	31	6	9
E2F1	E2F1_4	AGTCCAAGAACCACATCCAG	25	9	54	16	3	5	8	12
HOXD9	HOXD9_6	AGTCCACGTAGTAGTTGCTG	4	41	28	27	7	10	9	21
ATF4	ATF4_1	AGTCCCTCCAACAACAGCAA	116	36	55	84	3	20	30	39
KLF16	KLF16_7	AGTCCGGGAAGGGACAGCGG	20	9	25	3	0	0	5	0
TBX21	TBX21_6	AGTCCGGGTGGACGTACAGG	162	93	63	74	17	50	26	34
ZC3H8	ZC3H8_4	AGTCCGTGGCCGTTTTGCCG	363	142	136	74	17	33	27	43
ZNF224	ZNF224_5	AGTCCTACCCACCTTGAACG	85	53	49	46	6	10	8	26
ZNF223	ZNF223_6	AGTCCTACTTACCTTGGACA	75	50	44	31	9	20	8	11
ZNF35	ZNF35_6	AGTCCTGAAAGCAACTCAGG	103	59	73	109	8	29	24	46
ZNF275	ZNF275_1	AGTCCTGAATTCAGACAGCA	77	35	23	35	7	23	14	19
PAX4	PAX4_2	AGTCCTGCGGGCATTACAGG	95	28	22	46	8	19	12	40
FAM170A	FAM170A_7	AGTCCTTAGAAAAGCAGCCA	139	87	90	69	7	11	13	51
HINFP	HINFP_4	AGTCGGCAAGGACAACCCGG	148	66	74	49	12	22	14	23
ZNF446	ZNF446_6	AGTCTCAGGCTCCTCAAGGG	36	52	19	10	3	13	7	7
MXD3	MXD3_6	AGTCTGAGCGCTCAGAGGAG	87	22	48	28	0	6	1	23
ZKSCAN4	ZKSCAN4_6	AGTCTGCAGAAGACCAGACG	80	65	12	35	3	28	8	21
ZNF30	ZNF30_4	AGTCTGGACTCTTCCCAGAG	56	13	10	36	6	37	15	24
ZNF579	ZNF579_1	AGTCTGGGCACACGAAAGGG	36	52	47	47	9	12	17	16
TBX5	TBX5_2	AGTCTGGGTGCACGTACAGG	90	28	22	17	10	13	3	12
SP140L	SP140L_7	AGTCTGTATACACTTTGCCA	224	139	74	137	35	84	84	115
ZSCAN23	ZSCAN23_7	AGTCTTTGAAGAGCCTCCCG	106	152	98	55	13	43	10	23
ZNF507	ZNF507_6	AGTGAACTGAGTATCCACAA	161	50	26	35	2	20	13	12
ATF4	ATF4_7	AGTGAAGTGGATATCACTGA	25	40	10	13	4	8	7	2
GATAD2A	GATAD2A_4	AGTGAATGGGCTGACCACGG	62	22	33	18	13	24	3	0
ST18	ST18_2	AGTGACAGGACAGAGGACGA	75	30	31	29	1	11	10	11
NFIC	NFIC_6	AGTGACGCTGAACACGCCGG	114	40	42	64	14	33	27	42
ATF3	ATF3_4	AGTGACTGATTCCAGCGCAG	68	78	82	28	6	9	0	10
ALX1	ALX1_7	AGTGACTTTTACATGGGCGC	140	44	62	43	16	32	21	31
ZFX	ZFX_6	AGTGAGCCTGAGAATGATCA	148	29	65	30	1	7	4	0
HIC2	HIC2_6	AGTGAGGTGGGGACCTGGGG	34	11	8	0	1	2	0	0
IKZF3	IKZF3_3	AGTGATCAACAAGGAAGGGG	78	37	29	41	2	6	14	49
FOXN3	FOXN3_4	AGTGATCCAAAATGGAGCGC	138	43	7	39	6	29	20	29
TGIF2	TGIF2_5	AGTGATCTAGGTGAGGACGA	77	59	62	40	3	20	25	21
ZNF296	ZNF296_2	AGTGATGGCCTCCAACGGGA	44	95	30	59	6	31	8	26
DMRT1	DMRT1_1	AGTGCAACCTGATCGCCGAG	96	53	62	50	20	24	34	32
SREBF2	SREBF2_1	AGTGCAACGGTCATTCACCC	169	82	60	50	6	11	5	10
UBP1	UBP1_6	AGTGCAAGCGAGAATGGCAG	159	95	68	73	15	33	26	61
GLI1	GLI1_7	AGTGCAGCCAATACAGACAG	96	44	80	82	14	34	33	52
ZNF691	ZNF691_2	AGTGCCAGGAGAGCTTTCGG	20	45	42	39	2	11	12	19
ZNF75A	ZNF75A_7	AGTGCCGGAAAATCTCCTAC	85	61	34	30	7	21	10	18
ZNF540	ZNF540_2	AGTGCCTGGACACTACCCAG	82	45	63	18	2	24	9	17
ZNF138	ZNF138_3	AGTGCCTGGACACTGCACAG	125	16	44	12	2	13	11	8
ZNF677	ZNF677_3	AGTGCCTGGACCCTGCCCAG	9	15	12	8	0	2	0	0
ZNF790	ZNF790_3	AGTGCCTGGACCTGGAACAG	28	25	6	19	0	0	9	13
ZNF546	ZNF546_5	AGTGCCTGGACGCTGTGCAG	15	19	0	8	3	1	5	13
ZNF217	ZNF217_1	AGTGCGAACAGAACCTCCCA	118	94	48	30	8	14	9	13
ESRRB	ESRRB_1	AGTGCGAGATCACCAAACGG	78	77	89	21	17	27	25	31
NKX2-3	NKX2-3_7	AGTGCGCACCATGGAAGTGC	148	104	57	89	19	30	30	47
HIC2	HIC2_7	AGTGCGCAGAGCGGGAGCGA	107	41	65	58	12	8	9	18
RBCK1	RBCK1_1	AGTGCGCCCTGATATGACAG	94	67	39	18	20	25	5	25
SCML4	SCML4_3	AGTGCGGGGACCACCAGCGG	222	158	120	61	18	74	7	20
SPDEF	SPDEF_5	AGTGCTCAAGGACATCGAGA	91	82	48	64	6	23	16	32
PURA	PURA_7	AGTGCTCGATGAAGTCGCCC	211	92	70	66	10	17	29	12
MTF2	MTF2_3	AGTGCTGCAAATGTAAGCAG	62	51	29	53	11	20	35	59
PAX5	PAX5_3	AGTGCTGCCTCTCAAACACG	51	54	79	44	0	3	3	3
HOXC13	HOXC13_1	AGTGCTGGTAGCCTTCGACG	133	42	53	29	4	19	24	14
FOXP2	FOXP2_3	AGTGCTTTACTAACCTGCAG	71	47	26	49	7	13	13	21
CARF	CARF_4	AGTGGAAACAAATCAGACCA	149	78	29	43	7	16	29	28
ZNF534	ZNF534_4	AGTGGAAATGCCTGGACCCT	77	87	87	49	7	24	29	36
ZNF785	ZNF785_5	AGTGGAGGCGTGGAGCCCGG	108	62	2	13	15	26	1	2
ZFX	ZFX_5	AGTGGATGGCACTTGCCCTG	68	70	37	39	10	21	6	16
ZNF177	ZNF177_7	AGTGGCAGTGGACTTTTCCC	23	34	34	47	8	15	6	9
ZBED3	ZBED3_7	AGTGGCCACACCCCTACAGG	118	63	54	46	8	19	19	46
ZNF414	ZNF414_5	AGTGGCCAGCATGTCTGGGA	45	45	22	16	7	12	0	0
PAX2	PAX2_7	AGTGGCGACGCCCAAAGTGG	61	47	33	33	10	6	15	15
ARNTL2	ARNTL2_3	AGTGGCTCCTGCGATGGCGG	321	92	51	63	17	60	32	50
PAX4	PAX4_1	AGTGGCTCTGAGACTCCCCG	45	15	0	9	0	3	0	4
ZFP28	ZFP28_6	AGTGGCTGAACCCCATTCAG	103	60	10	30	9	21	3	8
ZNF202	ZNF202_3	AGTGGCTGAGACCAGAGAGG	8	11	0	0	1	1	0	0
THAP6	THAP6_7	AGTGGCTGGAACGGTTTTGA	199	80	70	36	8	11	15	19
ZNF513	ZNF513_4	AGTGGGACACGAAGGTGCAG	89	65	30	23	8	20	17	17
ZNF425	ZNF425_2	AGTGGGAGATCCTGGAGAAG	0	0	0	3	0	0	2	3
PRDM10	PRDM10_6	AGTGGGGACAGCAGACGGGA	35	15	81	31	2	2	0	1
ZFP42	ZFP42_3	AGTGGGGCTAAGCCCAGGCA	14	36	23	22	12	30	15	34
CAMTA2	CAMTA2_6	AGTGGGGCTATCAGTGGAGG	37	38	45	21	7	21	24	21
ZNF469	ZNF469_6	AGTGGGGTGGACACCAGCCC	156	24	58	37	9	14	8	10
PRDM1	PRDM1_5	AGTGGGGTTGAGCATGGGGT	0	14	38	14	0	2	2	1
ZNF229	ZNF229_5	AGTGGGTGAGAGGAATCCTC	33	30	17	5	9	15	1	2
ZNF281	ZNF281_3	AGTGGGTTCCTGAGTGGCGG	167	103	40	42	18	59	15	25
ZNF692	ZNF692_2	AGTGGTGCCTCCTCAAGGAG	59	53	30	23	4	10	12	12
NFKB1	NFKB1_4	AGTGGTGCTGGAGCTGGAGG	0	2	13	4	0	5	0	0
ZBTB33	ZBTB33_7	AGTGGTTCTTGAAGAAGTGT	48	131	49	36	20	45	3	20
ZNF576	ZNF576_4	AGTGGTTGCAACCGGCAGGG	59	47	47	21	11	12	22	43
ZNF582	ZNF582_2	AGTGGTTGGCACCTGCTCAG	124	77	73	67	23	39	19	59
TERB1/CCDC79	TERB1/CCDC79_5	AGTGGTTGTGACGAAGACTG	0	29	33	36	7	9	5	4
ZNF441	ZNF441_6	AGTGTAACAGGAACAACTGA	122	60	44	29	4	36	8	12
PAX3	PAX3_7	AGTGTCCACTCCCCTCGGCC	337	112	30	71	26	89	13	27
SPZ1	SPZ1_5	AGTGTCGGCTAAGCATGAGC	11	16	4	10	12	14	1	3
ZNF7	ZNF7_5	AGTGTCTGGACCCTGGCCAG	99	13	12	8	1	16	7	1
PRDM4	PRDM4_5	AGTGTGAATGGAGTCACTGA	156	37	46	88	9	28	34	39
ZNF791	ZNF791_6	AGTGTGACGAAGAAGACTGC	49	62	81	51	19	23	18	18
ZNF239	ZNF239_2	AGTGTGATGACTCTTCAAAG	107	66	84	47	6	15	23	17
FOSL2	FOSL2_3	AGTGTGCAAGATTAGCCCCG	109	64	63	35	3	7	5	16
MBD3	MBD3_4	AGTGTGCAGGGCGCTGGCGA	89	127	69	50	10	13	14	30
ZNF761	ZNF761_4	AGTGTGGAAAGACCTTTAGC	9	63	65	37	3	2	9	14
ZFP3	ZFP3_4	AGTGTGGAAAGGCTTTCAGG	85	41	17	6	5	19	3	5
ZNF766	ZNF766_4	AGTGTGGATTAACAGATGGG	4	7	0	0	1	0	5	13
ZNF765	ZNF765_7	AGTGTGGCAAGACCTTCAGC	99	36	54	21	4	9	6	12
ZNF761	ZNF761_1	AGTGTGGCAAGACCTTCAGT	37	9	6	7	0	1	6	7
ZNF628	ZNF628_2	AGTGTGGCAAGTCATTCCGG	147	47	70	44	7	20	11	23
HOXA11	HOXA11_2	AGTGTGGCCGGAAGACGACT	101	69	18	67	14	22	20	17
CIC	CIC_4	AGTGTGGCTGGGCTCAGGGG	11	38	41	21	3	6	8	22
ZSCAN26	ZSCAN26_3	AGTGTGGGAAAGCCTTTCAG	31	30	9	4	4	7	6	8
ZNF226	ZNF226_7	AGTGTGGGAAGAGCTTCAGG	0	3	6	6	2	5	0	0
NPAS2	NPAS2_7	AGTGTGTTAAAGTGCTGCCG	74	67	43	11	9	18	10	19
CENPBD1	CENPBD1_1	AGTGTTACGACGATTTGAAG	67	32	76	30	10	15	10	12
ZSCAN9	ZSCAN9_6	AGTGTTCCCTCACCCAGCCC	147	122	95	101	5	48	29	50
NFE2L2	NFE2L2_7	AGTTACCTGTAACTCAGGAA	62	17	9	7	3	11	0	2
ZNF490	ZNF490_7	AGTTCACAGCCACATCCTCA	0	0	0	3	0	1	0	0
ZNF200	ZNF200_3	AGTTCCGCCAGACTCCAAGC	32	61	108	8	3	4	3	14
ZNF804B	ZNF804B_2	AGTTCGAGACATCTCAGCAA	134	45	48	42	11	33	27	45
HOXC10	HOXC10_3	AGTTCGGAGTTACATTGCGA	61	46	70	39	6	12	31	36
HOXC12	HOXC12_2	AGTTCGTCCCTGCTCAACGA	26	23	20	13	4	3	8	5
ZNF565	ZNF565_4	AGTTCTAAAAGCCATGGCCC	34	26	34	48	6	15	13	19
ZNF230	ZNF230_1	AGTTCTCAAGCATCACGTCT	186	122	131	98	4	7	13	20
ZNF615	ZNF615_4	AGTTCTCCAACATCACGTCC	54	23	11	14	3	7	18	14
ZNF81	ZNF81_6	AGTTCTCCAACATTACATCC	83	76	12	31	11	22	3	13
ZNF788	ZNF788_2	AGTTCTGAGGCGCATCCAAA	186	95	118	35	22	47	27	21
BRF2	BRF2_5	AGTTCTGCCAAGCACAGAGA	14	17	24	8	1	3	6	3
ZSCAN32	ZSCAN32_1	AGTTGAGTTACCGCAAAGTG	61	34	41	30	10	12	12	4
CDC5L	CDC5L_2	AGTTGATGCCAACTCAGTGG	59	25	55	3	1	7	0	0
ZNF613	ZNF613_4	AGTTGGAACAAGGAGAGCCA	48	23	0	4	3	16	3	5
DACH1	DACH1_5	AGTTGGCCCAGAGGACGCCG	284	107	121	113	14	38	23	72
ZNF75D	ZNF75D_1	AGTTGGCTGATAGTCTCAAG	103	55	55	36	21	35	6	27
L3MBTL3	L3MBTL3_7	AGTTGGTACCATCCAAGTGG	120	63	24	7	3	19	1	5
NEUROD6	NEUROD6_1	AGTTGTCCAGAGCGTCGTTG	459	291	290	151	44	65	39	91
ZNF324	ZNF324_2	AGTTGTCTAGCATCACGCGG	147	40	74	47	8	7	6	24
ZNF572	ZNF572_1	AGTTTGAAAAGCCCTTTCAC	12	19	19	15	0	1	7	7
ZNF324B	ZNF324B_3	AGTTTTCCAGCATCACGTGG	170	75	104	58	12	19	38	41
ZNF470	ZNF470_5	ATAAAAGGAGGGATGAACAG	99	49	37	50	3	18	19	46
IRX5	IRX5_1	ATAAAATGACGTGGACGCCG	116	81	68	55	12	28	15	25
EN1	EN1_2	ATAACGTGTGCAGTACACCC	46	69	83	58	11	39	14	26
TERB1/CCDC79	TERB1/CCDC79_7	ATAATCTTGAAGAGCACTGG	134	43	44	38	8	25	26	31
ZFP64	ZFP64_5	ATACAAACTGGACCGTGCTG	150	57	62	44	2	11	5	13
AHR	AHR_7	ATACAACACAGCTTCTCCAG	371	190	167	126	19	63	41	73
ZNF580	ZNF580_3	ATACACGGTGCAGCTGGAGG	91	86	41	18	14	25	20	13
ZNF277	ZNF277_1	ATACACTTAAAGATCACATG	196	163	177	134	17	44	24	29
ZNF25	ZNF25_4	ATACAGAGTCCTCTGAGCAG	127	56	47	30	7	18	7	19
NR4A3	NR4A3_6	ATACAGCTCGGAATACACCA	32	48	22	15	4	1	17	26
ZNF441	ZNF441_7	ATACATGAAAGACCTCAGCA	79	113	79	92	4	29	31	43
L3MBTL3	L3MBTL3_1	ATACCAACTCGAAAGCCCGA	53	63	38	43	7	15	5	14
ZNF346	ZNF346_7	ATACCTAGCAATCCATGGAA	32	42	13	13	1	20	4	1
FOXD4L4	FOXD4L4_1	ATACCTCAGCAGCGCCGACG	22	20	7	15	2	4	2	13
FOXD4L6	FOXD4L6_2	ATACCTCAGCAGGGCCGACG	370	176	246	123	12	16	35	39
THAP9	THAP9_4	ATACGCACTGGTGGAAGGAG	142	40	17	44	10	9	18	17
MSANTD1	MSANTD1_5	ATACGGGAAGTACAGAGGGG	32	30	33	19	12	6	20	20
PLAGL2	PLAGL2_2	ATACTCGTAAGGATGTACGG	103	11	36	29	1	4	14	16
ZNF479	ZNF479_2	ATACTGGAGAGAAACCCTGC	111	33	41	45	12	15	18	22
HOXC6	HOXC6_6	ATACTGGCTTTCTGGTCCTG	108	52	21	31	22	63	12	22
SIX3	SIX3_1	ATACTTCTGGCGAGTAGCGG	10	34	23	57	5	23	16	14
ARID3A	ARID3A_1	ATAGACAGCAACCGACGGGA	56	77	56	64	32	50	30	39
ARID3C	ARID3C_4	ATAGACAGCAATCGGCGCGA	110	62	97	19	3	14	19	25
SETDB2	SETDB2_1	ATAGAGAAGAAACTCCACCA	74	98	44	62	8	26	19	26
ZNF311	ZNF311_4	ATAGAGATGCCTTTGAGCGT	106	46	74	31	15	14	22	25
GRHL1	GRHL1_3	ATAGAGCAGGCCCAGCGCAG	142	53	37	62	8	18	12	41
CPXCR1	CPXCR1_5	ATAGATCAAGATCCCACTCA	91	97	20	43	5	11	6	7
FOXD4L6	FOXD4L6_4	ATAGCAGCAGCATCAGGAGG	82	57	117	35	11	25	16	10
ARNTL2	ARNTL2_1	ATAGCCAAACTGAAAAGCGG	49	48	75	32	8	17	14	22
HOXB7	HOXB7_2	ATAGCCGGCCGCGTAGACGC	56	38	63	53	9	20	24	42
FOXM1	FOXM1_1	ATAGCCTATCCAACATCCAG	77	19	13	20	2	21	8	7
IRX1	IRX1_6	ATAGCGACCGGCGGCTGCGG	138	91	104	97	11	44	49	58
ZNF841	ZNF841_3	ATAGCGAGGAACCCAAACTG	80	54	53	25	9	11	17	15
HOXC4	HOXC4_7	ATAGCTGCACCAGTCTCCAG	35	55	15	42	3	4	13	6
ZNF563	ZNF563_2	ATAGGAACTGGAATCAGGCA	32	41	10	15	7	24	14	22
KLF5	KLF5_6	ATAGGAACTGGAGGAAGCTG	33	8	18	24	2	2	3	3
ZNF44	ZNF44_7	ATAGGAACTGTAAACAGGGA	35	47	60	9	9	19	10	14
MTERF4	MTERF4_1	ATAGGCAGTTTCAATAACTG	231	83	27	49	3	6	19	12
ZNF668	ZNF668_7	ATAGGGCCTAGGCTTGGCCG	104	63	86	43	20	24	11	15
NR4A1	NR4A1_5	ATAGTAGTCAGAGCCACTGG	81	22	32	12	11	22	9	15
THRB	THRB_5	ATAGTCAATGCCCCAGAAGG	82	57	50	17	1	5	3	7
NR6A1	NR6A1_7	ATAGTGACCACAGTTCCCCT	139	118	90	130	13	31	26	42
MBD6	MBD6_3	ATAGTGGCTGAAGACACTGG	68	45	64	12	6	2	14	21
ZNF611	ZNF611_6	ATATAAGGGATGAGCAGTGA	132	64	45	79	14	28	19	18
ZNF844	ZNF844_2	ATATATGCTGAGACAAGGGC	123	31	32	24	9	20	9	1
ZNF585A	ZNF585A_2	ATATCAAGTTCCTGAAGCAG	107	59	39	65	15	27	30	32
ZFP90	ZFP90_4	ATATCAAGTTTCCAAGCCAG	47	63	41	52	2	14	18	17
ZNF705G	ZNF705G_1	ATATCATGTGTGTTTTCTTA	102	63	77	38	19	24	18	24
ZNF589	ZNF589_5	ATATCTAGGCTTCTCTTCCC	16	69	67	41	5	13	22	15
ZFP69B	ZFP69B_7	ATATCTCTCTCCATCAGCCA	189	81	80	66	12	28	26	40
NFYB	NFYB_2	ATATCTTCCAATAGCAAACG	22	17	0	7	1	0	0	0
OLIG3	OLIG3_3	ATATGATGCAGAAGATGCCC	38	12	2	36	0	5	9	14
ZNF716	ZNF716_4	ATATGGAAAATGTGGACAGG	140	119	51	91	28	38	39	41
ZNF670	ZNF670_3	ATATGGAGAAACCTTCAGCC	89	94	33	11	7	15	6	5
GTF2I	GTF2I_7	ATATGGTACAGGTACCACTG	55	27	11	6	2	18	2	11
ZEB2	ZEB2_3	ATATGGTGACACACAAGCCA	0	8	3	0	0	0	0	0
MTF2	MTF2_2	ATATGTGACAAGTGTGGCCA	145	111	78	70	12	56	37	54
CENPA	CENPA_1	ATATGTGTTAAATTCACTCG	99	54	12	19	5	3	1	10
CREBL2	CREBL2_1	ATATGTTTCAGTACAAGCAG	170	54	23	62	5	9	18	33
ZNF658	ZNF658_2	ATATTGCATTACTAAACCTA	187	72	60	55	20	43	12	34
ZNF605	ZNF605_7	ATCAAACCTGGCAGAACCCA	139	90	85	109	8	28	16	27
PAX2	PAX2_6	ATCAAGCCGGGTGTGATCGG	97	49	70	68	7	13	12	35
SNAPC5	SNAPC5_4	ATCAATCAACCAAACAACCC	116	55	104	52	7	19	13	13
ETV4	ETV4_1	ATCAATGTACCTCCACACAG	145	108	94	30	14	29	21	26
SP1	SP1_6	ATCACAAATCGAGGAAGTGG	127	68	58	38	17	12	12	11
ZNF23	ZNF23_7	ATCACAGCAGGTTTGAGAAG	37	53	35	15	6	14	11	16
ARNT	ARNT_3	ATCACAGTGAAATTGAACGG	56	63	11	10	7	18	17	21
ZNF74	ZNF74_7	ATCACATCTGGCTTGTGCAG	121	71	68	32	7	35	13	10
POU3F2	POU3F2_1	ATCACCGCGCTGTCCCACGG	160	114	83	40	8	32	26	27
ZNF821	ZNF821_5	ATCAGAGGAAGATGGAGGGG	25	8	10	11	0	2	4	3
ZNF77	ZNF77_4	ATCAGCACCAAATCCCACAG	128	131	48	60	13	29	13	23
ZMAT1	ZMAT1_4	ATCAGGATTTCAACCAGAGA	59	66	53	63	13	42	21	13
ZNF821	ZNF821_2	ATCAGGGAAACATGTCCCGT	62	68	73	39	18	36	4	20
ZNF428	ZNF428_1	ATCATATTCAGGATCGTCAG	70	104	56	60	11	31	20	36
DR1	DR1_6	ATCATCATCGTTGCCAGACG	141	91	117	26	5	3	8	19
NFYC	NFYC_2	ATCATCGCACAGCCTCAGCA	90	30	21	22	5	8	3	4
EHF	EHF_7	ATCATGATTCTGGAAGGAGG	54	31	26	37	2	6	1	5
PURA	PURA_5	ATCATGGCGGACCGAGACAG	92	129	137	90	20	46	27	29
ZNF85	ZNF85_3	ATCATGGTGGCCAAACCCAC	85	38	40	24	0	9	11	24
MESP1	MESP1_2	ATCCAGGACTCGGAGAGCGG	121	88	47	84	9	22	23	44
FOXI2	FOXI2_7	ATCCCCTGGCTCATAGCCCG	119	54	20	15	5	24	6	3
ZNF774	ZNF774_2	ATCCCGAGGGAAAGCCACAC	100	30	24	2	7	27	0	5
ZNF654	ZNF654_3	ATCCGGACACAACCAAGAGC	144	123	43	80	21	44	52	61
ZNF391	ZNF391_7	ATCCTCTTTTGAGAACACAG	67	65	23	35	1	11	12	11
ZNF776	ZNF776_4	ATCGTACAGAAGCAATGCCA	56	70	9	32	12	23	19	7
ZNF721	ZNF721_6	ATCGTGACAGAGCCTTTGGA	68	31	30	24	7	20	10	19
FLI1	FLI1_6	ATCGTGAGGATTGGTCGGTG	176	111	37	70	15	48	13	19
ZNF471	ZNF471_1	ATCTCACTCGTCATCTCCCA	76	57	31	38	9	21	19	28
ZNF784	ZNF784_1	ATCTCGATGAGGTCACTCGG	168	147	218	95	17	67	28	68
HLX	HLX_1	ATCTCTAGATCCCATTAACG	35	56	39	24	8	28	12	14
NFYB	NFYB_1	ATCTCTGCAGACTATATTGG	0	4	0	7	3	5	3	2
ZNF705B	ZNF705B_1	ATCTCTGTACAGCTTTCTTT	204	95	57	99	20	76	12	34
ZNF233	ZNF233_6	ATCTTGGTACAGCTTTCTCT	48	80	81	53	13	47	26	58
TCF12	TCF12_6	ATGAAATATCCAGGAACCAG	49	48	74	28	21	30	19	21
ZNF571	ZNF571_6	ATGAAATGGAATCACTCCAG	34	42	32	23	7	19	11	24
[truncated: 9,364 more rows]
